# Supplementary material for: Lyophilizing SERS biosensors to enable translation into an easy-to-use assay
Source: Royal Society of Chemistry journal article supplement (doi:10.1039/d4ay01667j), 2024-01-01
Supplement: d4ay01667j1.zip [file d4ay01667j1.zip]

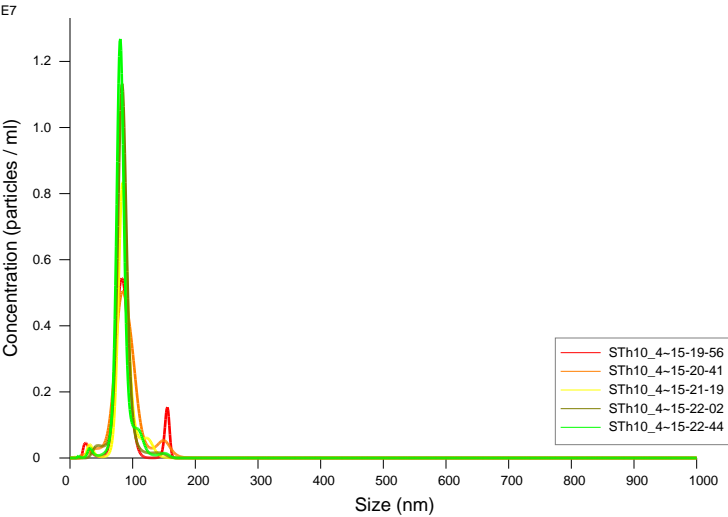

FTLA Concentration / Size graph for Experiment:  
STh10\_40x FD35 2023-06-28 15-19-12

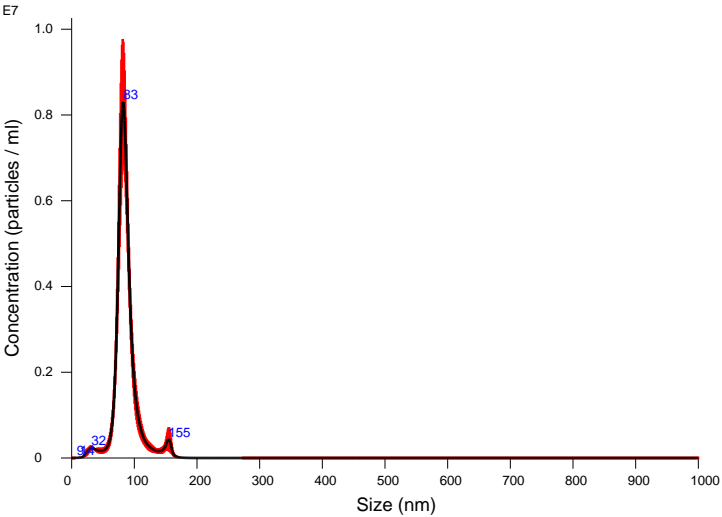

Averaged FTLA Concentration / Size for Experiment:  
STh10\_40x FD35 2023-06-28 15-19-12  
Error bars indicate + / - 1 standard error of the mean

|                                                                                                                                                                                                                                                                                                                                                                                                                                                                                                                                                                                                                                                                                                                                                                                                                                                                                                                                                                                                                                                                                                          |                                                                                                                                                                                                                                                                                                                                                                                                                                                                                                                                                                                                                                                                                                                                                                |
|----------------------------------------------------------------------------------------------------------------------------------------------------------------------------------------------------------------------------------------------------------------------------------------------------------------------------------------------------------------------------------------------------------------------------------------------------------------------------------------------------------------------------------------------------------------------------------------------------------------------------------------------------------------------------------------------------------------------------------------------------------------------------------------------------------------------------------------------------------------------------------------------------------------------------------------------------------------------------------------------------------------------------------------------------------------------------------------------------------|----------------------------------------------------------------------------------------------------------------------------------------------------------------------------------------------------------------------------------------------------------------------------------------------------------------------------------------------------------------------------------------------------------------------------------------------------------------------------------------------------------------------------------------------------------------------------------------------------------------------------------------------------------------------------------------------------------------------------------------------------------------|
| <div><div>Included Files</div><div>STh10_40x FD35 2023-06-28 15-19-56<br/>STh10_40x FD35 2023-06-28 15-20-41<br/>STh10_40x FD35 2023-06-28 15-21-19<br/>STh10_40x FD35 2023-06-28 15-22-02<br/>STh10_40x FD35 2023-06-28 15-22-44</div><div><div>Details</div><div><div>NTA Version:NTA 3.4 Build 3.4.4</div><div>Script Used:SOP Standard Measurement 03-19-12PM 28Jun2023.txt</div><div>Time Captured:15:19:12 28/06/2023</div><div>Operator:LN</div><div>Pre-treatment:</div><div>Sample Name:STh10_40x FD35</div><div>Diluent:</div><div>Remarks:</div></div><div><div>Capture Settings</div><div><div>Camera Type:sCMOS</div><div>Laser Type:Green</div><div>Camera Level:6</div><div>Slider Shutter:64</div><div>Slider Gain:5</div><div>FPS25.0</div><div>Number of Frames:749</div><div>Temperature:25.4 °C</div><div>Viscosity:(Water) 0.879 - 0.880 cP</div><div>Dilution factor:Dilution not recorded</div></div><div><div>Analysis Settings</div><div><div>Detect Threshold:5</div><div>Blur Size:Auto</div><div>Max Jump Distance:Auto: 21.7 - 24.8 pix</div></div></div></div></div></div> | <div><div>Results</div><div><div>Stats: Merged Data</div><div><div>Mean:86.2 nm</div><div>Mode:82.0 nm</div><div>SD:19.3 nm</div><div>D10:70.9 nm</div><div>D50:83.8 nm</div><div>D90:104.8 nm</div></div><div><div>Stats: Mean +/- Standard Error</div><div><div>Mean:86.5 +/- 1.4 nm</div><div>Mode:82.9 +/- 0.7 nm</div><div>SD:18.9 +/- 2.3 nm</div><div>D10:70.8 +/- 1.2 nm</div><div>D50:84.4 +/- 1.1 nm</div><div>D90:104.9 +/- 3.8 nm</div></div><div><div>Concentration (Upgrade):</div><div>2.00e+08 +/- 1.31e+07 particles/ml</div><div>33.1 +/- 2.1 particles/frame</div><div>112.2 +/- 4.3 centres/frame</div></div><div><div>Concentration measurements may be unreliable</div><div>See summary file for more info</div></div></div></div></div> |
|----------------------------------------------------------------------------------------------------------------------------------------------------------------------------------------------------------------------------------------------------------------------------------------------------------------------------------------------------------------------------------------------------------------------------------------------------------------------------------------------------------------------------------------------------------------------------------------------------------------------------------------------------------------------------------------------------------------------------------------------------------------------------------------------------------------------------------------------------------------------------------------------------------------------------------------------------------------------------------------------------------------------------------------------------------------------------------------------------------|----------------------------------------------------------------------------------------------------------------------------------------------------------------------------------------------------------------------------------------------------------------------------------------------------------------------------------------------------------------------------------------------------------------------------------------------------------------------------------------------------------------------------------------------------------------------------------------------------------------------------------------------------------------------------------------------------------------------------------------------------------------|

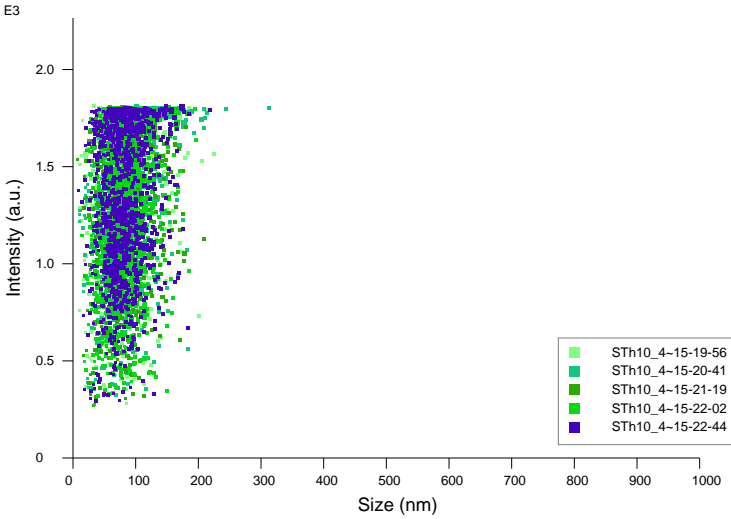

Intensity / Size graph for Experiment:  
STh10\_40x FD35 2023-06-28 15-19-12
