# Supplementary material for: Lyophilizing SERS biosensors to enable translation into an easy-to-use assay
Source: Royal Society of Chemistry journal article supplement (doi:10.1039/d4ay01667j), 2024-01-01
Supplement: d4ay01667j1.zip [file d4ay01667j1.zip]

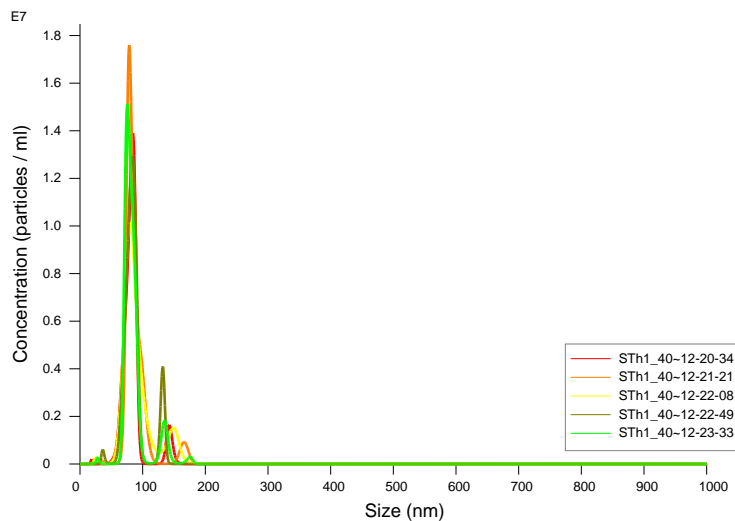

FTLA Concentration / Size graph for Experiment:  
STh1\_40x RT13 2023-05-31 12-20-16

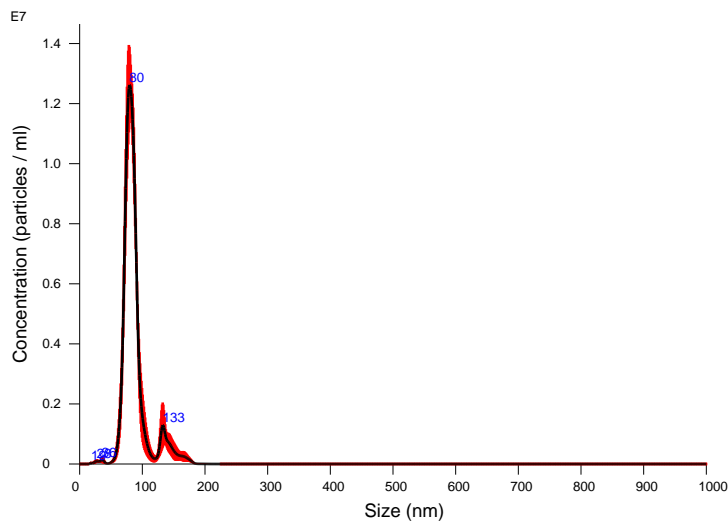

Averaged FTLA Concentration / Size for Experiment:  
STh1\_40x RT13 2023-05-31 12-20-16  
Error bars indicate + / - 1 standard error of the mean

### Included Files

STh1\_40x RT13 2023-05-31 12-20-34  
STh1\_40x RT13 2023-05-31 12-21-21  
STh1\_40x RT13 2023-05-31 12-22-08  
STh1\_40x RT13 2023-05-31 12-22-49  
STh1\_40x RT13 2023-05-31 12-23-33

### Details

NTA Version: NTA 3.4 Build 3.4.4  
Script Used: SOP Standard Measurement 12-20-16PM 31May2023.txt  
Time Captured: 12:20:16 31/05/2023  
Operator: LN  
Pre-treatment:  
Sample Name: STh1\_40x RT13  
Diluent:  
Remarks:

### Capture Settings

Camera Type: sCMOS  
Laser Type: Green  
Camera Level: 7  
Slider Shutter: 121  
Slider Gain: 24  
FPS: 25.0  
Number of Frames: 749  
Temperature: 24.5 - 24.5 °C  
Viscosity: (Water) 0.898 - 0.900 cP  
Dilution factor: Dilution not recorded

### Analysis Settings

Detect Threshold: 5  
Blur Size: Auto  
Max Jump Distance: Auto: 19.2 - 20.6 pix

### Results

#### Stats: Merged Data

Mean: 87.2 nm  
Mode: 79.9 nm  
SD: 20.9 nm  
D10: 70.8 nm  
D50: 82.3 nm  
D90: 110.6 nm

#### Stats: Mean +/- Standard Error

Mean: 87.1 +/- 1.2 nm  
Mode: 80.5 +/- 1.6 nm  
SD: 20.5 +/- 1.1 nm  
D10: 70.5 +/- 1.0 nm  
D50: 82.4 +/- 0.7 nm  
D90: 111.9 +/- 8.5 nm  
Concentration (Upgrade): 3.12e+08 +/- 9.81e+06 particles/ml  
49.4 +/- 1.3 particles/frame  
103.9 +/- 4.3 centres/frame

Concentration measurements may be unreliable  
See summary file for more info

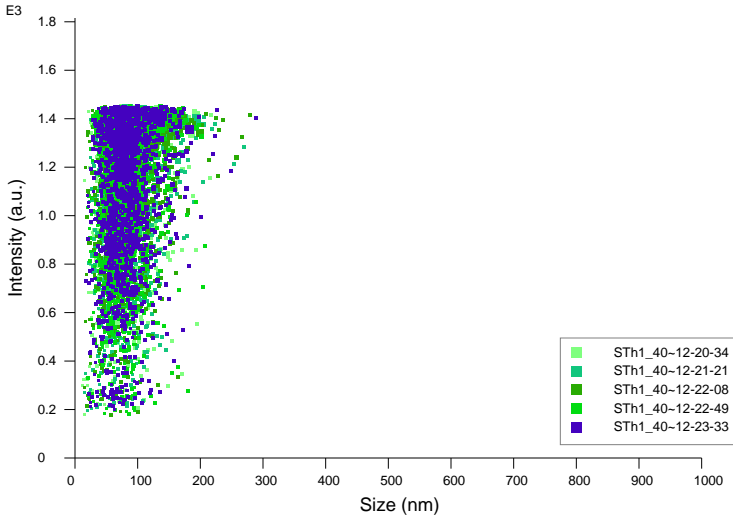

Intensity / Size graph for Experiment:  
STh1\_40x RT13 2023-05-31 12-20-16
