# Supplementary material for: Lyophilizing SERS biosensors to enable translation into an easy-to-use assay
Source: Royal Society of Chemistry journal article supplement (doi:10.1039/d4ay01667j), 2024-01-01
Supplement: d4ay01667j1.zip [file d4ay01667j1.zip]

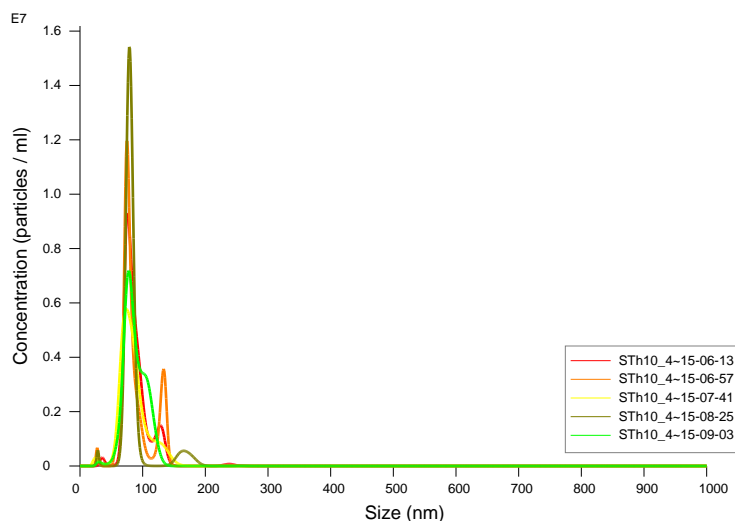

FTLA Concentration / Size graph for Experiment:  
STh10\_40x RT34 2023-06-21 15-05-59

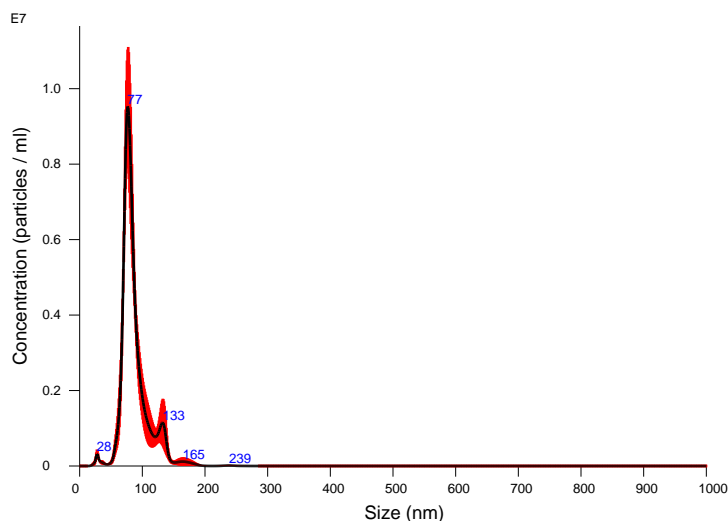

Averaged FTLA Concentration / Size for Experiment:  
STh10\_40x RT34 2023-06-21 15-05-59  
Error bars indicate + / - 1 standard error of the mean

### Included Files

STh10\_40x RT34 2023-06-21 15-06-13  
STh10\_40x RT34 2023-06-21 15-06-57  
STh10\_40x RT34 2023-06-21 15-07-41  
STh10\_40x RT34 2023-06-21 15-08-25  
STh10\_40x RT34 2023-06-21 15-09-03

### Details

NTA Version: NTA 3.4 Build 3.4.4  
Script Used: SOP Standard Measurement 03-05-59PM 21Jun2023.txt  
Time Captured: 15:05:59 21/06/2023  
Operator: LN  
Pre-treatment:  
Sample Name: STh10\_40x RT34  
Diluent:  
Remarks:

### Capture Settings

Camera Type: sCMOS  
Laser Type: Green  
Camera Level: 6  
Slider Shutter: 64  
Slider Gain: 5  
FPS: 25.0  
Number of Frames: 749  
Temperature: 25.0 °C  
Viscosity: (Water) 0.9 cP  
Dilution factor: Dilution not recorded

### Analysis Settings

Detect Threshold: 5  
Blur Size: Auto  
Max Jump Distance: Auto: 20.5 - 22.5 pix

### Results

#### Stats: Merged Data

Mean: 86.9 nm  
Mode: 76.8 nm  
SD: 22.2 nm  
D10: 68.6 nm  
D50: 81.1 nm  
D90: 119.0 nm

#### Stats: Mean +/- Standard Error

Mean: 86.9 +/- 0.7 nm  
Mode: 76.3 +/- 0.9 nm  
SD: 22.0 +/- 1.3 nm  
D10: 68.5 +/- 1.4 nm  
D50: 81.5 +/- 1.0 nm  
D90: 114.8 +/- 6.6 nm  
Concentration (Upgrade): 2.50e+08 +/- 5.48e+06 particles/ml  
39.5 +/- 0.9 particles/frame  
131.2 +/- 4.3 centres/frame

Concentration measurements may be unreliable  
See summary file for more info

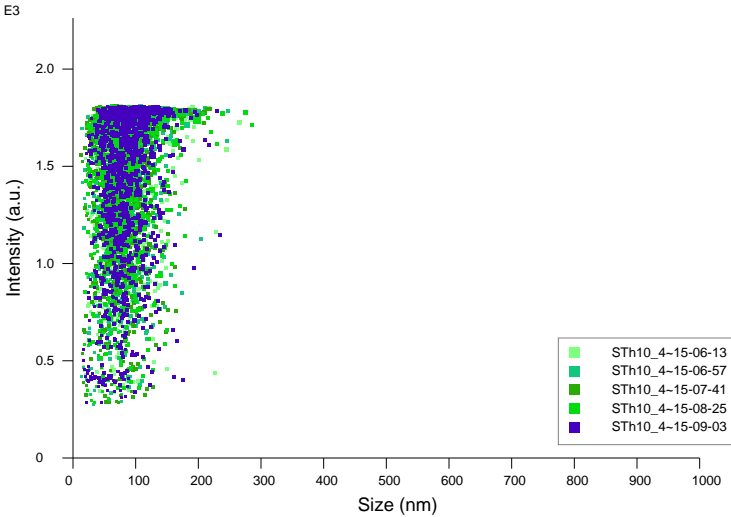

Intensity / Size graph for Experiment:  
STh10\_40x RT34 2023-06-21 15-05-59
