# Supplementary material for: Lyophilizing SERS biosensors to enable translation into an easy-to-use assay
Source: Royal Society of Chemistry journal article supplement (doi:10.1039/d4ay01667j), 2024-01-01
Supplement: d4ay01667j1.zip [file d4ay01667j1.zip]

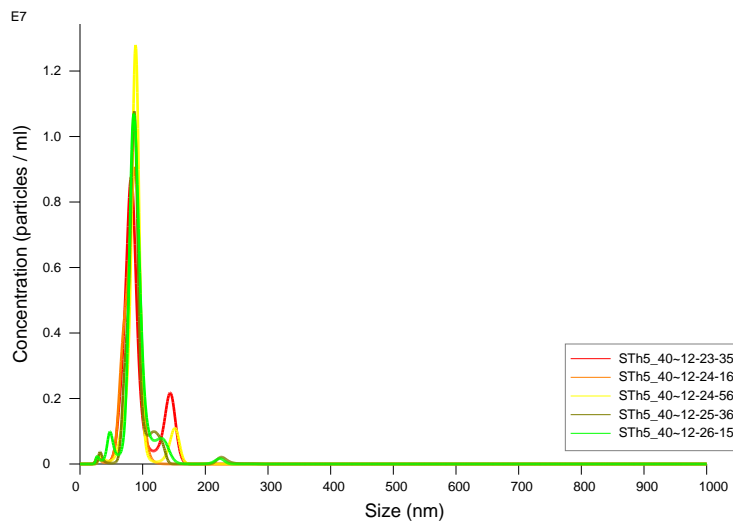

FTLA Concentration / Size graph for Experiment:  
STh5\_40x RT27 2023-06-14 12-23-20

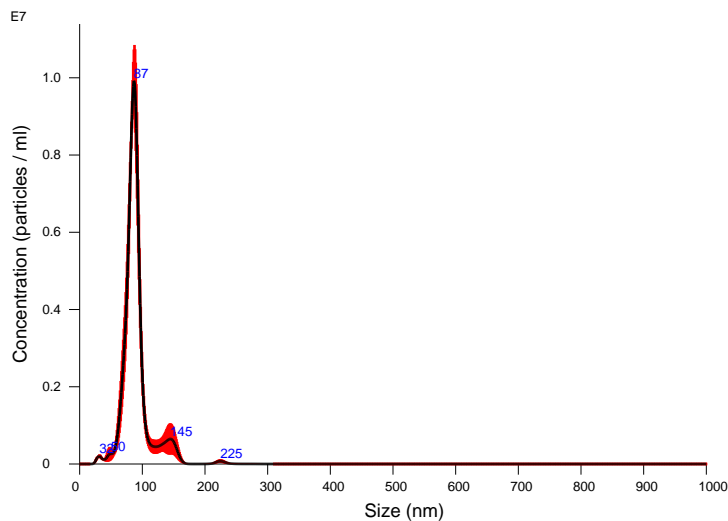

Averaged FTLA Concentration / Size for Experiment:  
STh5\_40x RT27 2023-06-14 12-23-20  
Error bars indicate + / - 1 standard error of the mean

### Included Files

STh5\_40x RT27 2023-06-14 12-23-35  
STh5\_40x RT27 2023-06-14 12-24-16  
STh5\_40x RT27 2023-06-14 12-24-56  
STh5\_40x RT27 2023-06-14 12-25-36  
STh5\_40x RT27 2023-06-14 12-26-15

### Details

NTA Version: NTA 3.4 Build 3.4.4  
Script Used: SOP Standard Measurement 12-23-20PM 14Jun2023.txt  
Time Captured: 12:23:20 14/06/2023  
Operator: LN  
Pre-treatment:  
Sample Name: STh5\_40x RT27  
Diluent:  
Remarks:

### Capture Settings

Camera Type: sCMOS  
Laser Type: Green  
Camera Level: 6  
Slider Shutter: 64  
Slider Gain: 5  
FPS: 25.0  
Number of Frames: 749  
Temperature: 24.7 °C  
Viscosity: (Water) 0.893 - 0.895 cP  
Dilution factor: Dilution not recorded

### Analysis Settings

Detect Threshold: 5  
Blur Size: Auto  
Max Jump Distance: Auto: 19.9 - 21.0 pix

### Results

#### Stats: Merged Data

Mean: 89.8 nm  
Mode: 86.8 nm  
SD: 22.6 nm  
D10: 70.4 nm  
D50: 86.5 nm  
D90: 113.8 nm

#### Stats: Mean +/- Standard Error

Mean: 89.8 +/- 1.7 nm  
Mode: 86.1 +/- 1.2 nm  
SD: 21.8 +/- 2.5 nm  
D10: 71.4 +/- 1.7 nm  
D50: 86.3 +/- 0.9 nm  
D90: 114.5 +/- 7.6 nm  
Concentration (Upgrade): 2.52e+08 +/- 5.51e+06 particles/ml  
40.6 +/- 0.6 particles/frame  
121.6 +/- 11.8 centres/frame

Concentration measurements may be unreliable  
See summary file for more info

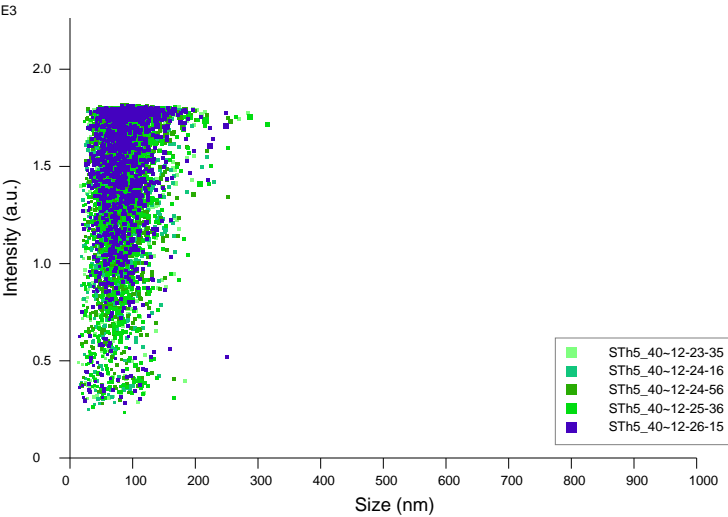

Intensity / Size graph for Experiment:  
STh5\_40x RT27 2023-06-14 12-23-20
