# Supplementary material for: Lyophilizing SERS biosensors to enable translation into an easy-to-use assay
Source: Royal Society of Chemistry journal article supplement (doi:10.1039/d4ay01667j), 2024-01-01
Supplement: d4ay01667j1.zip [file d4ay01667j1.zip]

## Sheet: Sheet1
Wavelength	D1	D2	D3	D4	D5	D6	D7	D8	D9	D10	D11	D12		Wavelength	Th0% RT6
300	0.093	0.085	0.081	0.082	0.073	0.079	0.064	0.081	0.041	0.082	0.078	0.082		300	0.08
301	0.089	0.082	0.079	0.079	0.07	0.076	0.063	0.077	0.041	0.081	0.076	0.079		301	0.075
302	0.089	0.08	0.079	0.078	0.07	0.076	0.065	0.077	0.041	0.079	0.074	0.076		302	0.075
303	0.088	0.079	0.078	0.076	0.069	0.075	0.064	0.075	0.042	0.077	0.073	0.076		303	0.073
304	0.086	0.077	0.077	0.075	0.067	0.075	0.064	0.074	0.041	0.076	0.072	0.073		304	0.071
305	0.085	0.076	0.076	0.074	0.067	0.074	0.063	0.072	0.041	0.075	0.07	0.072		305	0.07
306	0.085	0.074	0.074	0.072	0.066	0.073	0.062	0.071	0.041	0.074	0.069	0.07		306	0.068
307	0.083	0.073	0.072	0.07	0.064	0.071	0.061	0.069	0.04	0.072	0.067	0.068		307	0.067
308	0.081	0.07	0.07	0.067	0.062	0.069	0.06	0.066	0.039	0.069	0.065	0.066		308	0.065
309	0.08	0.069	0.069	0.067	0.06	0.068	0.059	0.065	0.039	0.069	0.064	0.065		309	0.064
310	0.078	0.068	0.068	0.065	0.059	0.066	0.057	0.064	0.039	0.067	0.062	0.063		310	0.063
311	0.077	0.067	0.066	0.064	0.058	0.065	0.056	0.063	0.039	0.066	0.061	0.062		311	0.061
312	0.076	0.065	0.065	0.062	0.057	0.064	0.055	0.061	0.038	0.065	0.06	0.061		312	0.06
313	0.075	0.064	0.064	0.061	0.056	0.063	0.054	0.06	0.038	0.064	0.059	0.06		313	0.059
314	0.074	0.063	0.062	0.059	0.054	0.061	0.053	0.058	0.037	0.062	0.057	0.058		314	0.058
315	0.073	0.062	0.062	0.058	0.053	0.061	0.052	0.057	0.037	0.061	0.056	0.057		315	0.057
316	0.072	0.061	0.061	0.057	0.053	0.06	0.052	0.056	0.037	0.06	0.056	0.056		316	0.057
317	0.072	0.06	0.06	0.057	0.052	0.059	0.051	0.056	0.037	0.06	0.055	0.055		317	0.055
318	0.071	0.06	0.059	0.056	0.052	0.058	0.051	0.055	0.037	0.059	0.055	0.055		318	0.054
319	0.07	0.059	0.058	0.055	0.051	0.058	0.05	0.054	0.036	0.058	0.054	0.054		319	0.054
320	0.07	0.059	0.059	0.055	0.051	0.057	0.05	0.054	0.036	0.058	0.053	0.054		320	0.053
321	0.07	0.059	0.058	0.055	0.051	0.057	0.05	0.054	0.036	0.057	0.053	0.054		321	0.053
322	0.07	0.058	0.058	0.054	0.051	0.057	0.05	0.054	0.036	0.057	0.053	0.053		322	0.052
323	0.07	0.059	0.058	0.055	0.051	0.057	0.051	0.054	0.037	0.057	0.053	0.053		323	0.052
324	0.07	0.059	0.058	0.055	0.051	0.057	0.051	0.054	0.037	0.057	0.053	0.053		324	0.052
325	0.071	0.06	0.059	0.056	0.052	0.058	0.052	0.055	0.037	0.058	0.054	0.054		325	0.052
326	0.072	0.06	0.06	0.056	0.053	0.059	0.053	0.055	0.037	0.058	0.055	0.055		326	0.053
327	0.073	0.061	0.061	0.057	0.054	0.06	0.054	0.057	0.038	0.059	0.056	0.056		327	0.054
328	0.074	0.063	0.063	0.059	0.055	0.061	0.056	0.058	0.039	0.06	0.057	0.057		328	0.054
329	0.076	0.065	0.064	0.06	0.057	0.063	0.057	0.06	0.039	0.062	0.059	0.059		329	0.056
330	0.077	0.066	0.066	0.062	0.059	0.065	0.059	0.062	0.04	0.063	0.061	0.06		330	0.057
331	0.079	0.068	0.068	0.064	0.061	0.067	0.061	0.064	0.041	0.065	0.063	0.062		331	0.058
332	0.081	0.071	0.07	0.067	0.064	0.07	0.064	0.066	0.042	0.067	0.065	0.065		332	0.059
333	0.084	0.073	0.072	0.069	0.065	0.072	0.066	0.068	0.042	0.069	0.067	0.067		333	0.061
334	0.086	0.075	0.075	0.071	0.068	0.074	0.068	0.07	0.043	0.071	0.069	0.068		334	0.062
335	0.088	0.077	0.077	0.073	0.069	0.076	0.071	0.072	0.044	0.072	0.071	0.071		335	0.063
336	0.09	0.079	0.079	0.075	0.072	0.078	0.073	0.075	0.044	0.074	0.073	0.073		336	0.065
337	0.092	0.081	0.081	0.077	0.074	0.08	0.075	0.077	0.045	0.076	0.075	0.075		337	0.066
338	0.094	0.083	0.083	0.079	0.076	0.082	0.077	0.079	0.046	0.078	0.077	0.077		338	0.067
339	0.096	0.085	0.085	0.081	0.077	0.084	0.08	0.08	0.046	0.079	0.079	0.078		339	0.068
340	0.098	0.087	0.087	0.083	0.079	0.086	0.081	0.082	0.047	0.081	0.081	0.08		340	0.069
341	0.1	0.089	0.089	0.085	0.081	0.088	0.084	0.084	0.047	0.082	0.082	0.082		341	0.071
342	0.102	0.091	0.091	0.087	0.083	0.09	0.086	0.086	0.048	0.084	0.084	0.084		342	0.072
343	0.104	0.092	0.093	0.088	0.085	0.091	0.087	0.088	0.048	0.085	0.086	0.085		343	0.073
344	0.105	0.094	0.094	0.09	0.086	0.093	0.089	0.089	0.048	0.087	0.087	0.087		344	0.074
345	0.107	0.095	0.096	0.092	0.088	0.095	0.091	0.091	0.049	0.088	0.089	0.088		345	0.075
346	0.108	0.097	0.098	0.093	0.089	0.096	0.093	0.092	0.049	0.089	0.09	0.089		346	0.076
347	0.11	0.098	0.099	0.094	0.09	0.097	0.094	0.093	0.049	0.09	0.091	0.091		347	0.077
348	0.111	0.099	0.1	0.095	0.091	0.099	0.096	0.095	0.05	0.091	0.093	0.092		348	0.078
349	0.113	0.101	0.102	0.097	0.093	0.1	0.097	0.097	0.05	0.093	0.094	0.093		349	0.078
350	0.113	0.102	0.103	0.098	0.094	0.101	0.098	0.098	0.051	0.093	0.095	0.094		350	0.079
351	0.115	0.103	0.104	0.099	0.095	0.102	0.1	0.099	0.051	0.094	0.096	0.095		351	0.08
352	0.116	0.104	0.105	0.1	0.096	0.104	0.101	0.1	0.051	0.095	0.097	0.096		352	0.081
353	0.117	0.105	0.106	0.101	0.097	0.104	0.102	0.101	0.052	0.096	0.098	0.097		353	0.081
354	0.118	0.106	0.107	0.102	0.098	0.105	0.103	0.102	0.052	0.097	0.099	0.098		354	0.082
355	0.119	0.107	0.109	0.103	0.099	0.107	0.104	0.103	0.052	0.097	0.1	0.099		355	0.083
356	0.12	0.108	0.109	0.104	0.1	0.108	0.106	0.104	0.053	0.098	0.101	0.1		356	0.083
357	0.121	0.109	0.111	0.106	0.101	0.109	0.107	0.106	0.053	0.099	0.102	0.101		357	0.084
358	0.121	0.11	0.112	0.107	0.102	0.11	0.108	0.106	0.053	0.1	0.102	0.102		358	0.084
359	0.122	0.111	0.113	0.108	0.103	0.111	0.109	0.107	0.054	0.1	0.103	0.102		359	0.085
360	0.123	0.112	0.114	0.109	0.104	0.112	0.11	0.108	0.054	0.101	0.104	0.103		360	0.085
361	0.124	0.113	0.115	0.11	0.105	0.113	0.111	0.11	0.054	0.102	0.105	0.104		361	0.086
362	0.124	0.114	0.116	0.111	0.106	0.113	0.112	0.11	0.055	0.102	0.106	0.105		362	0.086
363	0.125	0.114	0.117	0.112	0.107	0.114	0.113	0.111	0.055	0.103	0.107	0.105		363	0.087
364	0.125	0.115	0.118	0.112	0.108	0.115	0.114	0.112	0.055	0.104	0.108	0.106		364	0.087
365	0.126	0.116	0.119	0.114	0.109	0.116	0.115	0.113	0.055	0.104	0.108	0.107		365	0.088
366	0.127	0.118	0.12	0.115	0.11	0.117	0.116	0.115	0.056	0.105	0.11	0.108		366	0.088
367	0.127	0.118	0.121	0.116	0.111	0.117	0.117	0.115	0.056	0.106	0.11	0.109		367	0.089
368	0.127	0.119	0.122	0.116	0.112	0.118	0.118	0.116	0.056	0.106	0.111	0.11		368	0.089
369	0.127	0.12	0.123	0.118	0.113	0.119	0.119	0.117	0.056	0.107	0.112	0.11		369	0.09
370	0.128	0.121	0.124	0.119	0.114	0.119	0.12	0.118	0.057	0.107	0.113	0.111		370	0.09
371	0.128	0.122	0.125	0.12	0.115	0.12	0.12	0.119	0.056	0.108	0.114	0.112		371	0.091
372	0.129	0.123	0.126	0.121	0.116	0.121	0.121	0.12	0.057	0.109	0.115	0.113		372	0.091
373	0.129	0.123	0.126	0.121	0.117	0.121	0.122	0.121	0.057	0.109	0.115	0.114		373	0.092
374	0.129	0.124	0.127	0.122	0.118	0.122	0.123	0.122	0.057	0.11	0.116	0.114		374	0.092
375	0.13	0.125	0.128	0.123	0.119	0.123	0.124	0.123	0.057	0.111	0.117	0.116		375	0.093
376	0.13	0.126	0.129	0.124	0.12	0.124	0.125	0.124	0.058	0.111	0.118	0.116		376	0.094
377	0.131	0.127	0.13	0.125	0.12	0.124	0.126	0.125	0.058	0.112	0.119	0.117		377	0.094
378	0.131	0.128	0.131	0.126	0.121	0.125	0.127	0.125	0.058	0.113	0.12	0.118		378	0.094
379	0.132	0.128	0.132	0.126	0.122	0.125	0.127	0.126	0.058	0.113	0.12	0.118		379	0.095
380	0.132	0.129	0.133	0.127	0.123	0.126	0.129	0.127	0.058	0.114	0.121	0.119		380	0.095
381	0.132	0.13	0.133	0.128	0.123	0.127	0.13	0.128	0.059	0.114	0.122	0.12		381	0.096
382	0.132	0.131	0.134	0.129	0.124	0.128	0.13	0.129	0.059	0.115	0.123	0.121		382	0.096
383	0.132	0.131	0.135	0.13	0.125	0.128	0.131	0.129	0.059	0.116	0.123	0.121		383	0.096
384	0.132	0.132	0.136	0.13	0.125	0.129	0.132	0.13	0.059	0.116	0.124	0.122		384	0.097
385	0.132	0.132	0.136	0.131	0.126	0.13	0.133	0.131	0.059	0.117	0.125	0.123		385	0.098
386	0.131	0.133	0.137	0.132	0.127	0.131	0.134	0.132	0.06	0.118	0.126	0.124		386	0.098
387	0.131	0.133	0.138	0.133	0.127	0.131	0.134	0.132	0.06	0.118	0.126	0.124		387	0.099
388	0.13	0.134	0.139	0.133	0.128	0.132	0.135	0.133	0.06	0.119	0.127	0.125		388	0.099
389	0.129	0.134	0.139	0.134	0.128	0.133	0.136	0.134	0.06	0.119	0.128	0.125		389	0.1
390	0.129	0.135	0.14	0.135	0.129	0.134	0.137	0.135	0.06	0.12	0.128	0.126		390	0.1
391	0.129	0.135	0.141	0.135	0.13	0.134	0.137	0.135	0.061	0.12	0.129	0.127		391	0.1
392	0.129	0.136	0.141	0.136	0.13	0.135	0.138	0.136	0.06	0.12	0.129	0.127		392	0.101
393	0.129	0.136	0.142	0.137	0.131	0.135	0.138	0.136	0.061	0.121	0.13	0.128		393	0.101
394	0.129	0.137	0.142	0.137	0.132	0.136	0.139	0.137	0.061	0.121	0.13	0.128		394	0.102
395	0.129	0.138	0.143	0.138	0.132	0.137	0.14	0.138	0.061	0.122	0.131	0.129		395	0.101
396	0.129	0.138	0.143	0.138	0.133	0.137	0.14	0.138	0.061	0.122	0.132	0.129		396	0.102
397	0.129	0.139	0.144	0.139	0.133	0.138	0.141	0.139	0.061	0.123	0.132	0.13		397	0.102
398	0.13	0.139	0.145	0.14	0.134	0.138	0.141	0.139	0.061	0.123	0.133	0.131		398	0.103
399	0.13	0.14	0.145	0.14	0.134	0.139	0.142	0.14	0.061	0.124	0.133	0.131		399	0.103
400	0.131	0.14	0.146	0.141	0.135	0.14	0.142	0.141	0.061	0.124	0.134	0.132		400	0.104
401	0.131	0.141	0.147	0.141	0.135	0.14	0.143	0.141	0.061	0.125	0.134	0.132		401	0.104
402	0.131	0.141	0.147	0.142	0.136	0.141	0.143	0.142	0.061	0.125	0.135	0.133		402	0.104
403	0.132	0.142	0.148	0.142	0.136	0.141	0.144	0.142	0.061	0.126	0.135	0.133		403	0.105
404	0.132	0.142	0.148	0.143	0.137	0.142	0.144	0.143	0.062	0.126	0.136	0.134		404	0.105
405	0.132	0.143	0.149	0.143	0.137	0.142	0.144	0.143	0.062	0.126	0.136	0.134		405	0.106
406	0.133	0.143	0.149	0.144	0.138	0.143	0.145	0.143	0.062	0.127	0.136	0.134		406	0.105
407	0.133	0.144	0.15	0.144	0.138	0.143	0.145	0.144	0.062	0.127	0.137	0.135		407	0.106
408	0.134	0.144	0.15	0.145	0.139	0.144	0.146	0.144	0.062	0.128	0.137	0.135		408	0.106
409	0.134	0.144	0.151	0.145	0.139	0.144	0.146	0.145	0.062	0.128	0.137	0.136		409	0.107
410	0.135	0.145	0.151	0.146	0.14	0.145	0.147	0.145	0.062	0.129	0.138	0.137		410	0.107
411	0.135	0.146	0.152	0.147	0.14	0.146	0.148	0.146	0.062	0.129	0.139	0.137		411	0.108
412	0.136	0.146	0.152	0.147	0.141	0.146	0.148	0.147	0.062	0.129	0.139	0.137		412	0.108
413	0.136	0.146	0.153	0.147	0.141	0.146	0.148	0.147	0.062	0.13	0.14	0.138		413	0.108
414	0.136	0.147	0.153	0.148	0.141	0.146	0.149	0.147	0.062	0.13	0.14	0.138		414	0.109
415	0.137	0.148	0.154	0.148	0.142	0.147	0.15	0.148	0.062	0.131	0.141	0.139		415	0.109
416	0.138	0.148	0.154	0.149	0.142	0.147	0.15	0.148	0.062	0.131	0.141	0.139		416	0.11
417	0.138	0.148	0.155	0.149	0.143	0.148	0.15	0.149	0.062	0.132	0.142	0.14		417	0.11
418	0.138	0.149	0.155	0.15	0.143	0.148	0.151	0.149	0.062	0.132	0.142	0.14		418	0.111
419	0.139	0.149	0.156	0.15	0.144	0.149	0.151	0.15	0.062	0.132	0.142	0.14		419	0.111
420	0.139	0.15	0.156	0.151	0.144	0.149	0.152	0.15	0.062	0.133	0.143	0.141		420	0.111
421	0.139	0.15	0.156	0.151	0.144	0.149	0.152	0.15	0.062	0.133	0.143	0.141		421	0.112
422	0.14	0.15	0.157	0.152	0.145	0.15	0.153	0.151	0.062	0.133	0.143	0.141		422	0.112
423	0.141	0.151	0.157	0.152	0.145	0.15	0.154	0.152	0.062	0.134	0.144	0.142		423	0.113
424	0.141	0.151	0.158	0.152	0.146	0.151	0.154	0.152	0.062	0.134	0.144	0.142		424	0.113
425	0.141	0.152	0.158	0.153	0.146	0.151	0.154	0.152	0.062	0.134	0.145	0.143		425	0.113
426	0.142	0.152	0.159	0.153	0.146	0.151	0.155	0.152	0.062	0.135	0.145	0.143		426	0.114
427	0.142	0.153	0.159	0.154	0.147	0.152	0.156	0.153	0.063	0.135	0.146	0.144		427	0.115
428	0.143	0.153	0.16	0.155	0.147	0.152	0.156	0.154	0.063	0.136	0.146	0.144		428	0.115
429	0.143	0.153	0.16	0.155	0.148	0.153	0.157	0.155	0.063	0.136	0.147	0.144		429	0.115
430	0.144	0.155	0.161	0.155	0.149	0.154	0.158	0.155	0.063	0.137	0.147	0.145		430	0.116
431	0.143	0.154	0.161	0.156	0.148	0.154	0.158	0.154	0.063	0.137	0.147	0.145		431	0.116
432	0.144	0.155	0.162	0.156	0.149	0.154	0.159	0.155	0.063	0.137	0.148	0.146		432	0.116
433	0.145	0.155	0.162	0.157	0.15	0.155	0.159	0.156	0.063	0.137	0.149	0.146		433	0.117
434	0.145	0.156	0.163	0.158	0.15	0.156	0.16	0.158	0.064	0.138	0.149	0.148		434	0.117
435	0.146	0.156	0.163	0.157	0.15	0.155	0.16	0.158	0.063	0.138	0.149	0.147		435	0.117
436	0.146	0.157	0.163	0.158	0.151	0.156	0.161	0.158	0.063	0.139	0.15	0.148		436	0.117
437	0.147	0.157	0.164	0.159	0.151	0.157	0.161	0.159	0.063	0.139	0.151	0.149		437	0.118
438	0.147	0.158	0.165	0.16	0.152	0.158	0.162	0.159	0.064	0.14	0.152	0.149		438	0.118
439	0.148	0.159	0.165	0.16	0.152	0.158	0.162	0.16	0.064	0.14	0.151	0.15		439	0.119
440	0.148	0.159	0.166	0.16	0.153	0.159	0.163	0.161	0.064	0.141	0.152	0.15		440	0.119
441	0.149	0.159	0.166	0.16	0.153	0.159	0.163	0.161	0.064	0.141	0.152	0.15		441	0.119
442	0.149	0.16	0.166	0.162	0.154	0.16	0.164	0.161	0.064	0.141	0.153	0.151		442	0.12
443	0.149	0.161	0.167	0.161	0.154	0.16	0.164	0.161	0.064	0.141	0.153	0.151		443	0.12
444	0.15	0.161	0.168	0.162	0.155	0.161	0.165	0.162	0.064	0.142	0.154	0.152		444	0.12
445	0.15	0.161	0.168	0.162	0.155	0.161	0.165	0.163	0.064	0.142	0.154	0.152		445	0.12
446	0.151	0.162	0.168	0.163	0.155	0.162	0.165	0.163	0.064	0.143	0.155	0.153		446	0.121
447	0.151	0.162	0.169	0.164	0.156	0.162	0.166	0.164	0.064	0.143	0.155	0.153		447	0.121
448	0.152	0.163	0.169	0.164	0.156	0.163	0.167	0.164	0.064	0.143	0.156	0.153		448	0.121
449	0.152	0.163	0.17	0.164	0.157	0.163	0.167	0.165	0.064	0.144	0.156	0.154		449	0.121
450	0.153	0.163	0.17	0.165	0.157	0.164	0.168	0.165	0.064	0.144	0.157	0.154		450	0.122
451	0.153	0.164	0.171	0.166	0.158	0.165	0.168	0.166	0.065	0.144	0.157	0.155		451	0.122
452	0.154	0.164	0.171	0.166	0.158	0.165	0.169	0.167	0.065	0.145	0.158	0.156		452	0.122
453	0.154	0.165	0.171	0.166	0.158	0.165	0.169	0.167	0.064	0.145	0.158	0.156		453	0.123
454	0.154	0.165	0.172	0.167	0.159	0.166	0.169	0.167	0.065	0.146	0.158	0.156		454	0.123
455	0.155	0.166	0.172	0.167	0.159	0.166	0.17	0.168	0.065	0.146	0.159	0.157		455	0.123
456	0.155	0.166	0.173	0.168	0.16	0.167	0.17	0.169	0.065	0.146	0.159	0.158		456	0.124
457	0.155	0.167	0.173	0.168	0.16	0.167	0.171	0.169	0.065	0.146	0.16	0.157		457	0.124
458	0.157	0.167	0.174	0.169	0.161	0.168	0.172	0.17	0.065	0.147	0.16	0.158		458	0.124
459	0.157	0.168	0.174	0.169	0.161	0.169	0.171	0.17	0.065	0.147	0.161	0.159		459	0.124
460	0.157	0.168	0.175	0.169	0.162	0.169	0.172	0.171	0.065	0.148	0.162	0.16		460	0.125
461	0.158	0.169	0.175	0.17	0.162	0.169	0.173	0.171	0.065	0.148	0.162	0.159		461	0.125
462	0.158	0.169	0.176	0.17	0.162	0.17	0.173	0.171	0.065	0.148	0.162	0.16		462	0.125
463	0.158	0.169	0.177	0.172	0.163	0.171	0.174	0.172	0.065	0.149	0.163	0.161		463	0.126
464	0.16	0.171	0.177	0.172	0.163	0.172	0.174	0.173	0.065	0.15	0.164	0.161		464	0.126
465	0.16	0.171	0.178	0.173	0.165	0.173	0.175	0.174	0.066	0.151	0.164	0.163		465	0.125
466	0.161	0.171	0.178	0.173	0.165	0.173	0.174	0.173	0.066	0.151	0.164	0.163		466	0.127
467	0.161	0.172	0.178	0.174	0.165	0.173	0.176	0.174	0.066	0.151	0.165	0.163		467	0.127
468	0.162	0.173	0.179	0.175	0.166	0.174	0.176	0.175	0.066	0.152	0.165	0.164		468	0.128
469	0.162	0.173	0.18	0.175	0.167	0.174	0.177	0.175	0.066	0.152	0.166	0.165		469	0.127
470	0.163	0.175	0.181	0.176	0.168	0.175	0.178	0.177	0.067	0.154	0.167	0.166		470	0.128
471	0.164	0.175	0.181	0.177	0.168	0.176	0.178	0.177	0.067	0.154	0.168	0.166		471	0.128
472	0.164	0.175	0.182	0.177	0.168	0.176	0.178	0.177	0.066	0.154	0.168	0.166		472	0.128
473	0.165	0.176	0.183	0.177	0.169	0.177	0.178	0.178	0.067	0.155	0.168	0.167		473	0.129
474	0.165	0.176	0.184	0.178	0.17	0.177	0.18	0.178	0.066	0.155	0.168	0.167		474	0.13
475	0.166	0.177	0.184	0.179	0.17	0.178	0.18	0.179	0.067	0.155	0.169	0.168		475	0.13
476	0.167	0.178	0.185	0.18	0.171	0.178	0.181	0.18	0.067	0.156	0.171	0.169		476	0.129
477	0.168	0.178	0.186	0.18	0.172	0.179	0.182	0.181	0.067	0.157	0.171	0.169		477	0.131
478	0.168	0.179	0.186	0.181	0.172	0.18	0.182	0.181	0.067	0.157	0.171	0.17		478	0.132
479	0.169	0.179	0.187	0.182	0.173	0.18	0.183	0.182	0.067	0.158	0.172	0.171		479	0.132
480	0.169	0.181	0.187	0.182	0.174	0.181	0.184	0.182	0.067	0.158	0.173	0.172		480	0.132
481	0.171	0.182	0.189	0.184	0.174	0.182	0.185	0.183	0.068	0.159	0.174	0.173		481	0.133
482	0.172	0.183	0.19	0.185	0.176	0.183	0.186	0.184	0.068	0.16	0.175	0.174		482	0.133
483	0.172	0.183	0.19	0.185	0.176	0.183	0.186	0.185	0.068	0.161	0.175	0.174		483	0.134
484	0.173	0.183	0.191	0.186	0.176	0.184	0.187	0.186	0.068	0.162	0.176	0.175		484	0.135
485	0.172	0.184	0.191	0.186	0.177	0.184	0.187	0.186	0.068	0.161	0.176	0.175		485	0.135
486	0.174	0.185	0.192	0.187	0.178	0.185	0.188	0.187	0.068	0.163	0.177	0.176		486	0.136
487	0.175	0.186	0.194	0.189	0.179	0.186	0.19	0.188	0.069	0.163	0.178	0.177		487	0.136
488	0.176	0.187	0.194	0.189	0.179	0.187	0.19	0.189	0.069	0.164	0.178	0.178		488	0.137
489	0.176	0.187	0.195	0.19	0.18	0.187	0.191	0.189	0.069	0.164	0.179	0.178		489	0.137
490	0.177	0.189	0.196	0.191	0.181	0.188	0.192	0.19	0.069	0.166	0.18	0.18		490	0.138
491	0.178	0.189	0.196	0.192	0.182	0.189	0.193	0.191	0.069	0.166	0.181	0.18		491	0.139
492	0.179	0.19	0.197	0.192	0.182	0.189	0.194	0.192	0.069	0.167	0.181	0.181		492	0.14
493	0.179	0.191	0.198	0.193	0.183	0.19	0.194	0.192	0.069	0.167	0.182	0.182		493	0.14
494	0.18	0.191	0.199	0.194	0.183	0.191	0.195	0.193	0.069	0.168	0.183	0.182		494	0.14
495	0.181	0.193	0.2	0.195	0.184	0.192	0.196	0.194	0.07	0.169	0.184	0.183		495	0.141
496	0.181	0.193	0.201	0.196	0.185	0.192	0.197	0.195	0.07	0.169	0.184	0.184		496	0.142
497	0.182	0.194	0.201	0.196	0.186	0.193	0.198	0.196	0.07	0.17	0.185	0.185		497	0.142
498	0.183	0.194	0.202	0.197	0.186	0.193	0.198	0.196	0.07	0.171	0.185	0.185		498	0.143
499	0.183	0.195	0.202	0.197	0.186	0.194	0.199	0.197	0.071	0.171	0.186	0.186		499	0.143
500	0.184	0.195	0.203	0.198	0.187	0.194	0.199	0.197	0.071	0.172	0.186	0.186		500	0.144
501	0.184	0.196	0.203	0.198	0.187	0.195	0.2	0.197	0.07	0.172	0.187	0.186		501	0.144
502	0.185	0.196	0.204	0.199	0.188	0.195	0.2	0.198	0.071	0.172	0.187	0.187		502	0.144
503	0.185	0.197	0.204	0.199	0.188	0.196	0.201	0.199	0.071	0.173	0.188	0.188		503	0.145
504	0.185	0.197	0.204	0.2	0.188	0.196	0.201	0.199	0.071	0.173	0.188	0.188		504	0.145
505	0.185	0.197	0.205	0.2	0.189	0.196	0.202	0.2	0.072	0.173	0.188	0.188		505	0.145
506	0.186	0.197	0.205	0.2	0.189	0.196	0.202	0.2	0.072	0.174	0.188	0.188		506	0.145
507	0.186	0.198	0.205	0.201	0.189	0.197	0.202	0.2	0.072	0.174	0.189	0.189		507	0.146
508	0.186	0.198	0.205	0.201	0.189	0.197	0.203	0.2	0.072	0.174	0.189	0.189		508	0.146
509	0.186	0.198	0.205	0.201	0.189	0.196	0.203	0.2	0.072	0.174	0.189	0.189		509	0.145
510	0.186	0.198	0.205	0.201	0.189	0.196	0.203	0.2	0.072	0.174	0.189	0.189		510	0.146
511	0.186	0.198	0.205	0.201	0.189	0.196	0.203	0.2	0.073	0.174	0.189	0.189		511	0.146
512	0.186	0.197	0.205	0.201	0.189	0.196	0.202	0.2	0.072	0.174	0.189	0.189		512	0.146
513	0.186	0.197	0.205	0.2	0.189	0.196	0.202	0.199	0.073	0.173	0.188	0.188		513	0.145
514	0.185	0.196	0.204	0.2	0.188	0.195	0.202	0.199	0.073	0.173	0.188	0.188		514	0.146
515	0.185	0.196	0.204	0.199	0.188	0.195	0.202	0.199	0.073	0.173	0.188	0.188		515	0.145
516	0.184	0.196	0.204	0.199	0.188	0.195	0.201	0.198	0.073	0.173	0.187	0.188		516	0.145
517	0.184	0.195	0.203	0.198	0.187	0.194	0.201	0.198	0.073	0.172	0.187	0.187		517	0.145
518	0.183	0.194	0.202	0.197	0.186	0.193	0.2	0.197	0.073	0.172	0.186	0.186		518	0.144
519	0.183	0.194	0.202	0.197	0.186	0.193	0.199	0.197	0.073	0.171	0.185	0.186		519	0.144
520	0.182	0.193	0.201	0.196	0.185	0.192	0.199	0.196	0.073	0.171	0.185	0.185		520	0.143
521	0.181	0.192	0.2	0.196	0.185	0.191	0.198	0.196	0.073	0.17	0.184	0.184		521	0.143
522	0.18	0.191	0.199	0.195	0.184	0.191	0.197	0.195	0.073	0.169	0.183	0.183		522	0.142
523	0.18	0.19	0.198	0.194	0.183	0.19	0.196	0.194	0.074	0.169	0.182	0.183		523	0.141
524	0.179	0.19	0.197	0.193	0.182	0.189	0.196	0.193	0.074	0.168	0.182	0.182		524	0.141
525	0.178	0.189	0.196	0.192	0.181	0.188	0.194	0.192	0.074	0.167	0.181	0.181		525	0.14
526	0.176	0.187	0.195	0.191	0.18	0.187	0.193	0.191	0.073	0.167	0.18	0.18		526	0.14
527	0.176	0.186	0.194	0.19	0.179	0.186	0.192	0.19	0.074	0.166	0.179	0.179		527	0.139
528	0.174	0.185	0.193	0.188	0.178	0.185	0.191	0.188	0.074	0.165	0.178	0.178		528	0.138
529	0.173	0.184	0.192	0.188	0.177	0.184	0.19	0.188	0.073	0.164	0.177	0.177		529	0.138
530	0.173	0.183	0.191	0.187	0.177	0.183	0.189	0.187	0.074	0.163	0.176	0.176		530	0.137
531	0.171	0.182	0.189	0.185	0.175	0.182	0.188	0.185	0.074	0.162	0.175	0.175		531	0.136
532	0.17	0.18	0.188	0.184	0.174	0.18	0.186	0.184	0.074	0.161	0.173	0.174		532	0.135
533	0.169	0.179	0.187	0.183	0.173	0.179	0.185	0.183	0.074	0.16	0.172	0.172		533	0.134
534	0.168	0.178	0.186	0.182	0.172	0.178	0.184	0.182	0.073	0.159	0.171	0.172		534	0.134
535	0.166	0.177	0.184	0.18	0.171	0.177	0.183	0.18	0.074	0.158	0.17	0.17		535	0.133
536	0.165	0.176	0.183	0.179	0.17	0.176	0.181	0.179	0.074	0.157	0.169	0.169		536	0.131
537	0.164	0.174	0.182	0.178	0.168	0.175	0.18	0.178	0.074	0.156	0.168	0.168		537	0.131
538	0.163	0.173	0.18	0.176	0.167	0.173	0.179	0.177	0.073	0.155	0.167	0.167		538	0.13
539	0.161	0.171	0.179	0.175	0.166	0.172	0.177	0.175	0.073	0.154	0.165	0.165		539	0.129
540	0.16	0.17	0.177	0.173	0.165	0.17	0.175	0.173	0.073	0.153	0.164	0.164		540	0.127
541	0.158	0.168	0.176	0.172	0.163	0.169	0.174	0.172	0.073	0.152	0.162	0.163		541	0.127
542	0.157	0.167	0.174	0.171	0.162	0.168	0.173	0.171	0.073	0.151	0.161	0.161		542	0.126
543	0.156	0.166	0.173	0.169	0.161	0.166	0.171	0.169	0.073	0.15	0.16	0.16		543	0.125
544	0.155	0.164	0.171	0.167	0.159	0.165	0.17	0.168	0.073	0.148	0.159	0.159		544	0.124
545	0.153	0.163	0.17	0.166	0.158	0.163	0.169	0.167	0.073	0.147	0.158	0.157		545	0.123
546	0.152	0.161	0.168	0.164	0.157	0.162	0.167	0.165	0.073	0.146	0.156	0.156		546	0.122
547	0.15	0.16	0.167	0.163	0.155	0.161	0.165	0.164	0.073	0.145	0.155	0.155		547	0.121
548	0.149	0.159	0.166	0.162	0.155	0.16	0.164	0.162	0.073	0.144	0.154	0.154		548	0.12
549	0.147	0.157	0.164	0.16	0.153	0.158	0.163	0.161	0.073	0.143	0.152	0.152		549	0.119
550	0.146	0.155	0.163	0.159	0.152	0.157	0.161	0.159	0.073	0.141	0.151	0.151		550	0.118
551	0.145	0.154	0.161	0.157	0.151	0.155	0.16	0.158	0.073	0.141	0.15	0.149		551	0.116
552	0.143	0.152	0.159	0.156	0.149	0.154	0.158	0.156	0.073	0.139	0.148	0.147		552	0.115
553	0.142	0.151	0.158	0.155	0.148	0.152	0.157	0.155	0.073	0.138	0.147	0.146		553	0.114
554	0.141	0.15	0.157	0.153	0.147	0.151	0.155	0.154	0.073	0.137	0.146	0.145		554	0.114
555	0.139	0.148	0.155	0.151	0.145	0.149	0.153	0.152	0.072	0.136	0.144	0.144		555	0.112
556	0.138	0.147	0.154	0.15	0.144	0.148	0.152	0.151	0.072	0.134	0.143	0.142		556	0.111
557	0.137	0.145	0.152	0.148	0.143	0.147	0.151	0.149	0.072	0.134	0.141	0.141		557	0.11
558	0.135	0.144	0.151	0.147	0.141	0.145	0.149	0.148	0.072	0.132	0.14	0.14		558	0.109
559	0.134	0.143	0.149	0.145	0.14	0.144	0.147	0.146	0.072	0.131	0.139	0.138		559	0.108
560	0.132	0.141	0.147	0.144	0.138	0.142	0.146	0.144	0.072	0.13	0.137	0.137		560	0.107
561	0.131	0.139	0.146	0.143	0.137	0.141	0.144	0.143	0.072	0.129	0.136	0.136		561	0.106
562	0.13	0.138	0.145	0.141	0.136	0.139	0.143	0.141	0.072	0.128	0.135	0.134		562	0.105
563	0.128	0.137	0.143	0.14	0.135	0.138	0.141	0.14	0.072	0.126	0.134	0.133		563	0.104
564	0.127	0.135	0.141	0.138	0.133	0.136	0.139	0.138	0.071	0.125	0.132	0.131		564	0.103
565	0.126	0.134	0.14	0.137	0.132	0.135	0.138	0.137	0.071	0.124	0.131	0.13		565	0.102
566	0.124	0.132	0.138	0.135	0.13	0.134	0.136	0.135	0.071	0.123	0.129	0.129		566	0.101
567	0.123	0.131	0.137	0.134	0.13	0.132	0.135	0.134	0.071	0.122	0.128	0.127		567	0.1
568	0.121	0.129	0.136	0.132	0.128	0.131	0.134	0.133	0.071	0.12	0.127	0.126		568	0.099
569	0.12	0.128	0.134	0.131	0.127	0.129	0.132	0.131	0.071	0.119	0.126	0.124		569	0.098
570	0.119	0.127	0.133	0.13	0.126	0.129	0.131	0.13	0.071	0.118	0.124	0.123		570	0.097
571	0.118	0.126	0.132	0.128	0.124	0.127	0.13	0.128	0.071	0.117	0.123	0.122		571	0.096
572	0.116	0.124	0.13	0.127	0.123	0.126	0.128	0.127	0.071	0.116	0.122	0.121		572	0.095
573	0.115	0.123	0.129	0.126	0.122	0.124	0.127	0.126	0.07	0.115	0.121	0.12		573	0.094
574	0.114	0.121	0.127	0.124	0.12	0.122	0.125	0.124	0.07	0.114	0.119	0.118		574	0.093
575	0.112	0.12	0.126	0.122	0.119	0.121	0.124	0.123	0.07	0.113	0.118	0.117		575	0.092
576	0.111	0.119	0.125	0.121	0.118	0.12	0.122	0.121	0.07	0.112	0.117	0.115		576	0.091
577	0.111	0.118	0.123	0.12	0.117	0.119	0.121	0.121	0.07	0.111	0.116	0.115		577	0.09
578	0.109	0.116	0.122	0.119	0.116	0.118	0.12	0.119	0.07	0.11	0.115	0.113		578	0.089
579	0.108	0.115	0.121	0.118	0.115	0.116	0.119	0.118	0.069	0.109	0.113	0.112		579	0.089
580	0.107	0.114	0.119	0.116	0.113	0.115	0.117	0.116	0.069	0.108	0.112	0.111		580	0.088
581	0.105	0.113	0.118	0.115	0.112	0.114	0.116	0.115	0.069	0.107	0.111	0.11		581	0.087
582	0.105	0.112	0.117	0.114	0.112	0.113	0.115	0.114	0.069	0.106	0.11	0.109		582	0.086
583	0.103	0.11	0.116	0.113	0.11	0.112	0.114	0.113	0.069	0.105	0.109	0.107		583	0.085
584	0.102	0.109	0.115	0.111	0.109	0.11	0.112	0.112	0.069	0.104	0.108	0.106		584	0.084
585	0.101	0.108	0.113	0.11	0.108	0.109	0.111	0.11	0.069	0.103	0.107	0.105		585	0.084
586	0.1	0.107	0.113	0.109	0.107	0.108	0.11	0.109	0.069	0.102	0.106	0.104		586	0.082
587	0.099	0.106	0.111	0.108	0.106	0.107	0.109	0.108	0.069	0.101	0.104	0.103		587	0.081
588	0.098	0.104	0.11	0.107	0.105	0.106	0.108	0.107	0.069	0.1	0.104	0.102		588	0.081
589	0.097	0.103	0.109	0.105	0.104	0.105	0.106	0.105	0.068	0.099	0.102	0.101		589	0.08
590	0.096	0.102	0.107	0.104	0.103	0.103	0.105	0.104	0.068	0.098	0.101	0.1		590	0.079
591	0.095	0.101	0.106	0.103	0.102	0.102	0.104	0.103	0.068	0.097	0.1	0.099		591	0.079
592	0.094	0.1	0.105	0.102	0.101	0.102	0.103	0.102	0.068	0.097	0.099	0.098		592	0.077
593	0.092	0.098	0.104	0.101	0.099	0.1	0.101	0.1	0.067	0.095	0.098	0.096		593	0.077
594	0.092	0.098	0.103	0.1	0.099	0.099	0.101	0.1	0.067	0.094	0.097	0.095		594	0.076
595	0.09	0.097	0.102	0.099	0.098	0.098	0.099	0.099	0.067	0.094	0.096	0.094		595	0.075
596	0.089	0.096	0.1	0.097	0.097	0.097	0.098	0.097	0.068	0.093	0.095	0.093		596	0.074
597	0.089	0.095	0.1	0.097	0.096	0.096	0.097	0.096	0.067	0.092	0.094	0.092		597	0.074
598	0.088	0.094	0.099	0.096	0.095	0.095	0.096	0.096	0.067	0.091	0.094	0.092		598	0.074
599	0.087	0.093	0.098	0.095	0.094	0.094	0.096	0.095	0.067	0.09	0.092	0.091		599	0.072
600	0.086	0.092	0.097	0.094	0.093	0.093	0.095	0.094	0.067	0.089	0.091	0.09		600	0.071
601	0.085	0.091	0.096	0.093	0.092	0.092	0.094	0.093	0.067	0.089	0.091	0.089		601	0.071
602	0.084	0.09	0.095	0.092	0.092	0.091	0.093	0.092	0.067	0.088	0.09	0.088		602	0.07
603	0.083	0.089	0.093	0.091	0.091	0.09	0.092	0.09	0.066	0.087	0.089	0.087		603	0.07
604	0.082	0.088	0.093	0.09	0.09	0.089	0.091	0.09	0.067	0.087	0.088	0.086		604	0.069
605	0.082	0.088	0.092	0.089	0.089	0.088	0.09	0.089	0.066	0.086	0.087	0.085		605	0.068
606	0.081	0.087	0.091	0.088	0.088	0.087	0.089	0.088	0.066	0.085	0.086	0.085		606	0.068
607	0.08	0.085	0.09	0.087	0.087	0.086	0.088	0.087	0.066	0.084	0.085	0.084		607	0.067
608	0.079	0.085	0.09	0.087	0.087	0.086	0.088	0.086	0.066	0.084	0.085	0.083		608	0.067
609	0.078	0.084	0.088	0.085	0.086	0.085	0.086	0.085	0.066	0.083	0.084	0.082		609	0.066
610	0.077	0.083	0.088	0.085	0.085	0.084	0.086	0.084	0.066	0.082	0.083	0.081		610	0.065
611	0.076	0.082	0.087	0.084	0.084	0.083	0.085	0.083	0.066	0.081	0.082	0.08		611	0.065
612	0.076	0.081	0.086	0.083	0.084	0.082	0.084	0.083	0.065	0.081	0.081	0.08		612	0.064
613	0.075	0.081	0.085	0.082	0.082	0.081	0.083	0.081	0.066	0.08	0.08	0.079		613	0.063
614	0.074	0.08	0.084	0.082	0.082	0.081	0.082	0.081	0.066	0.08	0.08	0.078		614	0.063
615	0.074	0.079	0.084	0.08	0.082	0.08	0.082	0.08	0.066	0.079	0.079	0.078		615	0.062
616	0.073	0.079	0.083	0.08	0.081	0.08	0.081	0.08	0.065	0.078	0.079	0.077		616	0.062
617	0.073	0.078	0.082	0.079	0.08	0.079	0.08	0.079	0.066	0.078	0.078	0.076		617	0.062
618	0.072	0.077	0.081	0.078	0.08	0.078	0.08	0.078	0.065	0.077	0.077	0.075		618	0.061
619	0.071	0.076	0.081	0.077	0.079	0.077	0.079	0.077	0.065	0.076	0.076	0.074		619	0.06
620	0.07	0.076	0.08	0.077	0.078	0.076	0.078	0.076	0.065	0.076	0.076	0.074		620	0.06
621	0.07	0.075	0.079	0.076	0.078	0.076	0.077	0.076	0.065	0.075	0.074	0.073		621	0.059
622	0.069	0.074	0.078	0.075	0.077	0.075	0.077	0.075	0.065	0.075	0.074	0.072		622	0.059
623	0.068	0.073	0.077	0.074	0.076	0.074	0.076	0.074	0.065	0.074	0.073	0.071		623	0.058
624	0.068	0.073	0.077	0.073	0.075	0.074	0.075	0.073	0.065	0.074	0.073	0.071		624	0.057
625	0.067	0.072	0.076	0.073	0.075	0.073	0.074	0.073	0.065	0.073	0.072	0.07		625	0.057
626	0.066	0.071	0.075	0.072	0.074	0.072	0.074	0.072	0.064	0.072	0.071	0.069		626	0.057
627	0.066	0.071	0.075	0.072	0.074	0.072	0.073	0.071	0.064	0.072	0.071	0.069		627	0.056
628	0.065	0.07	0.074	0.071	0.073	0.071	0.073	0.071	0.064	0.071	0.07	0.068		628	0.056
629	0.065	0.07	0.073	0.07	0.073	0.071	0.072	0.07	0.064	0.071	0.069	0.068		629	0.055
630	0.064	0.069	0.073	0.07	0.072	0.07	0.071	0.07	0.064	0.07	0.069	0.067		630	0.055
631	0.064	0.069	0.072	0.07	0.072	0.07	0.071	0.069	0.064	0.07	0.069	0.067		631	0.054
632	0.063	0.068	0.071	0.068	0.071	0.069	0.07	0.068	0.064	0.069	0.068	0.066		632	0.054
633	0.062	0.067	0.071	0.068	0.071	0.069	0.07	0.068	0.064	0.069	0.067	0.066		633	0.053
634	0.062	0.067	0.07	0.067	0.07	0.068	0.069	0.067	0.064	0.069	0.067	0.065		634	0.053
635	0.061	0.066	0.07	0.067	0.07	0.068	0.069	0.067	0.064	0.068	0.066	0.065		635	0.053
636	0.061	0.065	0.069	0.066	0.069	0.067	0.068	0.066	0.064	0.067	0.066	0.064		636	0.052
637	0.06	0.065	0.069	0.066	0.069	0.067	0.068	0.066	0.064	0.067	0.066	0.063		637	0.052
638	0.06	0.065	0.068	0.066	0.069	0.067	0.068	0.065	0.064	0.067	0.065	0.063		638	0.052
639	0.059	0.064	0.068	0.065	0.068	0.066	0.067	0.065	0.064	0.066	0.064	0.062		639	0.051
640	0.059	0.064	0.067	0.064	0.068	0.065	0.067	0.064	0.064	0.066	0.064	0.062		640	0.051
641	0.058	0.063	0.067	0.064	0.067	0.065	0.066	0.064	0.064	0.066	0.063	0.061		641	0.051
642	0.058	0.062	0.066	0.063	0.067	0.064	0.066	0.063	0.064	0.065	0.062	0.061		642	0.05
643	0.057	0.062	0.066	0.063	0.066	0.064	0.065	0.062	0.063	0.065	0.062	0.06		643	0.05
644	0.057	0.062	0.066	0.062	0.066	0.064	0.065	0.062	0.064	0.065	0.062	0.06		644	0.05
645	0.057	0.061	0.065	0.062	0.066	0.063	0.065	0.062	0.064	0.064	0.061	0.059		645	0.049
646	0.056	0.061	0.064	0.061	0.065	0.063	0.064	0.061	0.063	0.064	0.061	0.059		646	0.049
647	0.055	0.06	0.064	0.061	0.065	0.063	0.064	0.061	0.063	0.063	0.06	0.058		647	0.049
648	0.055	0.06	0.064	0.061	0.065	0.062	0.063	0.061	0.064	0.063	0.06	0.058		648	0.048
649	0.055	0.059	0.063	0.06	0.064	0.062	0.063	0.06	0.063	0.063	0.06	0.058		649	0.048
650	0.055	0.059	0.062	0.06	0.064	0.062	0.063	0.06	0.063	0.062	0.059	0.057		650	0.048
651	0.054	0.059	0.062	0.059	0.063	0.061	0.062	0.059	0.063	0.062	0.059	0.057		651	0.048
652	0.054	0.058	0.062	0.059	0.063	0.061	0.062	0.059	0.063	0.062	0.058	0.056		652	0.047
653	0.053	0.058	0.061	0.058	0.063	0.06	0.061	0.058	0.063	0.061	0.058	0.056		653	0.047
654	0.053	0.058	0.061	0.057	0.063	0.06	0.061	0.058	0.063	0.061	0.058	0.056		654	0.047
655	0.052	0.057	0.06	0.057	0.062	0.06	0.06	0.058	0.063	0.06	0.057	0.055		655	0.046
656	0.052	0.057	0.06	0.057	0.062	0.059	0.06	0.058	0.063	0.06	0.057	0.054		656	0.046
657	0.052	0.056	0.059	0.056	0.061	0.059	0.06	0.057	0.063	0.059	0.056	0.054		657	0.046
658	0.051	0.056	0.059	0.056	0.061	0.059	0.06	0.057	0.063	0.059	0.056	0.054		658	0.046
659	0.051	0.056	0.059	0.056	0.061	0.059	0.059	0.056	0.063	0.059	0.056	0.053		659	0.045
660	0.051	0.055	0.059	0.055	0.061	0.059	0.059	0.056	0.063	0.059	0.055	0.053		660	0.045
661	0.05	0.055	0.058	0.055	0.06	0.058	0.058	0.055	0.063	0.058	0.055	0.053		661	0.045
662	0.05	0.055	0.057	0.055	0.06	0.058	0.058	0.055	0.063	0.058	0.055	0.052		662	0.044
663	0.05	0.054	0.057	0.054	0.059	0.057	0.058	0.055	0.063	0.058	0.054	0.052		663	0.044
664	0.049	0.054	0.057	0.053	0.059	0.057	0.057	0.054	0.063	0.057	0.053	0.051		664	0.044
665	0.049	0.053	0.057	0.053	0.059	0.057	0.057	0.054	0.063	0.057	0.053	0.051		665	0.044
666	0.049	0.053	0.056	0.053	0.059	0.057	0.057	0.054	0.063	0.057	0.053	0.051		666	0.044
667	0.048	0.053	0.056	0.053	0.058	0.056	0.056	0.053	0.063	0.057	0.052	0.051		667	0.044
668	0.048	0.052	0.055	0.052	0.058	0.056	0.056	0.053	0.063	0.056	0.052	0.05		668	0.043
669	0.048	0.052	0.055	0.052	0.058	0.056	0.056	0.053	0.063	0.056	0.052	0.05		669	0.043
670	0.047	0.051	0.054	0.051	0.057	0.055	0.055	0.052	0.063	0.056	0.051	0.05		670	0.043
671	0.047	0.051	0.054	0.051	0.057	0.055	0.055	0.052	0.063	0.055	0.051	0.049		671	0.042
672	0.046	0.051	0.054	0.051	0.057	0.055	0.054	0.051	0.063	0.055	0.051	0.049		672	0.042
673	0.046	0.051	0.054	0.051	0.057	0.055	0.055	0.052	0.063	0.055	0.051	0.049		673	0.042
674	0.046	0.05	0.053	0.05	0.056	0.055	0.054	0.051	0.063	0.055	0.05	0.048		674	0.041
675	0.046	0.05	0.053	0.049	0.056	0.054	0.054	0.051	0.063	0.054	0.05	0.048		675	0.042
676	0.045	0.05	0.053	0.05	0.056	0.054	0.054	0.05	0.063	0.054	0.05	0.048		676	0.042
677	0.045	0.049	0.052	0.049	0.055	0.053	0.053	0.05	0.062	0.053	0.049	0.047		677	0.041
678	0.045	0.049	0.052	0.049	0.055	0.053	0.053	0.05	0.062	0.053	0.049	0.047		678	0.041
679	0.045	0.049	0.052	0.048	0.055	0.053	0.053	0.05	0.063	0.053	0.049	0.047		679	0.041
680	0.044	0.048	0.051	0.048	0.055	0.053	0.053	0.049	0.063	0.053	0.048	0.046		680	0.041
681	0.044	0.048	0.051	0.048	0.055	0.053	0.052	0.049	0.063	0.053	0.048	0.046		681	0.04
682	0.044	0.048	0.051	0.048	0.054	0.053	0.052	0.049	0.063	0.053	0.048	0.046		682	0.041
683	0.044	0.048	0.05	0.047	0.054	0.052	0.052	0.049	0.062	0.052	0.047	0.045		683	0.04
684	0.043	0.047	0.05	0.047	0.054	0.052	0.052	0.048	0.062	0.052	0.047	0.045		684	0.04
685	0.043	0.048	0.05	0.047	0.054	0.052	0.052	0.048	0.063	0.052	0.047	0.045		685	0.04
686	0.043	0.047	0.05	0.047	0.054	0.052	0.051	0.048	0.062	0.052	0.047	0.045		686	0.04
687	0.043	0.047	0.049	0.046	0.054	0.052	0.051	0.048	0.063	0.051	0.047	0.045		687	0.04
688	0.043	0.047	0.049	0.046	0.053	0.052	0.051	0.047	0.062	0.051	0.046	0.044		688	0.039
689	0.042	0.046	0.049	0.046	0.053	0.051	0.05	0.048	0.062	0.051	0.046	0.044		689	0.039
690	0.042	0.046	0.048	0.045	0.053	0.051	0.05	0.047	0.062	0.051	0.046	0.044		690	0.039
691	0.042	0.046	0.049	0.045	0.053	0.051	0.05	0.047	0.062	0.05	0.046	0.044		691	0.039
692	0.042	0.046	0.049	0.045	0.053	0.051	0.05	0.047	0.063	0.05	0.046	0.044		692	0.039
693	0.041	0.045	0.048	0.045	0.052	0.051	0.049	0.046	0.062	0.05	0.045	0.043		693	0.039
694	0.041	0.045	0.047	0.044	0.052	0.05	0.049	0.046	0.062	0.049	0.045	0.043		694	0.038
695	0.041	0.045	0.047	0.044	0.052	0.05	0.049	0.046	0.063	0.049	0.044	0.043		695	0.039
696	0.041	0.045	0.047	0.044	0.051	0.05	0.049	0.046	0.062	0.049	0.044	0.042		696	0.038
697	0.04	0.045	0.047	0.044	0.051	0.05	0.049	0.046	0.062	0.049	0.044	0.042		697	0.038
698	0.04	0.045	0.047	0.044	0.051	0.05	0.048	0.045	0.063	0.049	0.044	0.042		698	0.038
699	0.04	0.044	0.047	0.044	0.051	0.05	0.048	0.045	0.062	0.049	0.044	0.042		699	0.038
700	0.04	0.044	0.046	0.043	0.051	0.05	0.048	0.045	0.062	0.048	0.043	0.042		700	0.038
701	0.039	0.044	0.046	0.043	0.051	0.049	0.047	0.044	0.062	0.048	0.043	0.041		701	0.038
702	0.039	0.043	0.046	0.042	0.05	0.05	0.047	0.044	0.062	0.048	0.043	0.041		702	0.037
703	0.04	0.043	0.046	0.043	0.05	0.05	0.047	0.044	0.062	0.047	0.043	0.041		703	0.037
704	0.039	0.044	0.045	0.043	0.05	0.049	0.047	0.044	0.062	0.048	0.043	0.041		704	0.037
705	0.04	0.043	0.046	0.041	0.05	0.049	0.048	0.044	0.062	0.048	0.043	0.041		705	0.037
706	0.039	0.043	0.045	0.041	0.049	0.048	0.047	0.043	0.062	0.047	0.041	0.039		706	0.037
707	0.039	0.043	0.045	0.042	0.05	0.048	0.048	0.043	0.062	0.047	0.042	0.04		707	0.036
708	0.036	0.04	0.044	0.04	0.048	0.047	0.046	0.042	0.061	0.045	0.04	0.038		708	0.037
709	0.037	0.042	0.044	0.04	0.049	0.048	0.045	0.042	0.061	0.046	0.041	0.039		709	0.036
710	0.037	0.041	0.044	0.041	0.048	0.048	0.046	0.042	0.062	0.045	0.04	0.039		710	0.037
711	0.038	0.042	0.044	0.04	0.049	0.048	0.045	0.042	0.06	0.046	0.04	0.038		711	0.037
712	0.036	0.039	0.042	0.04	0.047	0.047	0.045	0.041	0.061	0.045	0.039	0.039		712	0.037
713	0.037	0.04	0.043	0.04	0.047	0.047	0.045	0.043	0.061	0.045	0.039	0.037		713	0.036
714	0.036	0.038	0.041	0.038	0.046	0.045	0.043	0.041	0.059	0.044	0.038	0.036		714	0.037
715	0.036	0.04	0.042	0.039	0.047	0.047	0.045	0.042	0.061	0.044	0.039	0.037		715	0.037
716	0.036	0.04	0.043	0.038	0.047	0.048	0.045	0.042	0.061	0.045	0.039	0.038		716	0.036
717	0.036	0.039	0.043	0.038	0.047	0.047	0.044	0.041	0.061	0.044	0.039	0.037		717	0.037
718	0.035	0.039	0.041	0.038	0.046	0.046	0.045	0.041	0.061	0.044	0.038	0.037		718	0.035
719	0.036	0.039	0.042	0.039	0.046	0.047	0.045	0.041	0.061	0.044	0.038	0.037		719	0.035
720	0.035	0.039	0.041	0.038	0.046	0.046	0.044	0.041	0.061	0.043	0.038	0.037		720	0.035
721	0.034	0.039	0.041	0.037	0.046	0.046	0.044	0.04	0.061	0.043	0.038	0.036		721	0.035
722	0.035	0.039	0.041	0.037	0.046	0.047	0.044	0.041	0.061	0.043	0.038	0.036		722	0.036
723	0.034	0.038	0.041	0.037	0.046	0.047	0.044	0.04	0.061	0.043	0.038	0.036		723	0.035
724	0.034	0.038	0.04	0.037	0.045	0.046	0.043	0.04	0.061	0.043	0.038	0.036		724	0.035
725	0.034	0.038	0.04	0.037	0.045	0.046	0.043	0.04	0.061	0.043	0.037	0.036		725	0.035
726	0.034	0.038	0.04	0.037	0.045	0.046	0.043	0.04	0.061	0.042	0.037	0.036		726	0.035
727	0.034	0.038	0.04	0.037	0.045	0.046	0.043	0.04	0.061	0.043	0.037	0.035		727	0.035
728	0.034	0.037	0.04	0.036	0.044	0.045	0.043	0.04	0.061	0.042	0.037	0.035		728	0.035
729	0.033	0.038	0.04	0.036	0.045	0.045	0.042	0.039	0.06	0.042	0.037	0.035		729	0.034
730	0.033	0.037	0.039	0.036	0.044	0.045	0.042	0.039	0.06	0.042	0.037	0.035		730	0.035
731	0.033	0.037	0.04	0.036	0.044	0.045	0.042	0.039	0.061	0.042	0.036	0.035		731	0.035
732	0.033	0.037	0.039	0.036	0.044	0.045	0.042	0.039	0.061	0.042	0.036	0.035		732	0.034
733	0.033	0.037	0.039	0.036	0.044	0.045	0.042	0.039	0.06	0.041	0.036	0.035		733	0.034
734	0.033	0.037	0.039	0.036	0.044	0.045	0.042	0.039	0.061	0.041	0.036	0.034		734	0.034
735	0.032	0.037	0.039	0.035	0.043	0.045	0.041	0.038	0.06	0.041	0.036	0.034		735	0.033
736	0.033	0.037	0.039	0.035	0.043	0.044	0.041	0.038	0.06	0.041	0.036	0.034		736	0.034
737	0.032	0.037	0.039	0.035	0.043	0.045	0.041	0.038	0.06	0.041	0.036	0.034		737	0.034
738	0.032	0.036	0.038	0.035	0.043	0.044	0.041	0.038	0.06	0.041	0.036	0.034		738	0.034
739	0.032	0.037	0.038	0.035	0.043	0.044	0.041	0.038	0.06	0.041	0.036	0.034		739	0.034
740	0.032	0.036	0.038	0.035	0.043	0.044	0.04	0.038	0.06	0.04	0.036	0.034		740	0.034
741	0.032	0.036	0.038	0.035	0.043	0.044	0.041	0.038	0.061	0.041	0.036	0.034		741	0.033
742	0.032	0.036	0.038	0.035	0.043	0.044	0.04	0.038	0.06	0.04	0.035	0.034		742	0.034
743	0.032	0.036	0.037	0.035	0.043	0.044	0.04	0.037	0.06	0.04	0.035	0.034		743	0.033
744	0.032	0.036	0.038	0.035	0.042	0.044	0.04	0.037	0.06	0.04	0.035	0.033		744	0.033
745	0.032	0.036	0.038	0.035	0.043	0.044	0.04	0.037	0.06	0.04	0.035	0.033		745	0.033
746	0.032	0.036	0.038	0.034	0.043	0.043	0.04	0.037	0.06	0.04	0.035	0.034		746	0.033
747	0.032	0.035	0.037	0.034	0.042	0.043	0.04	0.037	0.06	0.04	0.035	0.033		747	0.033
748	0.032	0.036	0.038	0.035	0.042	0.043	0.039	0.037	0.06	0.039	0.035	0.033		748	0.033
749	0.031	0.035	0.037	0.034	0.042	0.043	0.039	0.037	0.06	0.039	0.034	0.033		749	0.033
750	0.031	0.035	0.037	0.034	0.042	0.043	0.039	0.037	0.06	0.039	0.034	0.033		750	0.033
751	0.032	0.035	0.037	0.034	0.042	0.043	0.039	0.037	0.06	0.039	0.034	0.033		751	0.032
752	0.031	0.035	0.037	0.034	0.042	0.043	0.039	0.036	0.06	0.039	0.034	0.033		752	0.033
753	0.031	0.035	0.037	0.034	0.041	0.042	0.038	0.036	0.06	0.039	0.034	0.033		753	0.033
754	0.031	0.035	0.037	0.034	0.042	0.042	0.039	0.036	0.06	0.039	0.034	0.033		754	0.032
755	0.031	0.035	0.036	0.033	0.041	0.042	0.038	0.036	0.06	0.039	0.034	0.032		755	0.032
756	0.031	0.034	0.036	0.033	0.041	0.042	0.038	0.036	0.06	0.038	0.034	0.032		756	0.032
757	0.031	0.034	0.036	0.033	0.041	0.042	0.038	0.036	0.06	0.039	0.034	0.032		757	0.032
758	0.031	0.035	0.037	0.033	0.041	0.042	0.038	0.036	0.06	0.038	0.034	0.032		758	0.032
759	0.031	0.034	0.036	0.033	0.041	0.042	0.038	0.035	0.06	0.038	0.034	0.032		759	0.032
760	0.03	0.034	0.036	0.033	0.041	0.042	0.038	0.035	0.06	0.038	0.034	0.032		760	0.032
761	0.03	0.034	0.036	0.033	0.041	0.041	0.037	0.036	0.06	0.038	0.033	0.032		761	0.032
762	0.03	0.034	0.036	0.033	0.041	0.042	0.037	0.035	0.06	0.038	0.033	0.032		762	0.032
763	0.03	0.034	0.036	0.033	0.04	0.041	0.037	0.035	0.06	0.038	0.034	0.032		763	0.032
764	0.03	0.034	0.036	0.033	0.04	0.041	0.037	0.035	0.06	0.038	0.033	0.032		764	0.032
765	0.03	0.034	0.036	0.033	0.04	0.041	0.037	0.035	0.06	0.038	0.033	0.032		765	0.031
766	0.03	0.034	0.036	0.032	0.04	0.041	0.037	0.035	0.06	0.037	0.033	0.031		766	0.031
767	0.03	0.034	0.036	0.033	0.04	0.041	0.037	0.035	0.06	0.038	0.033	0.031		767	0.031
768	0.03	0.033	0.036	0.033	0.04	0.04	0.037	0.035	0.06	0.038	0.033	0.031		768	0.031
769	0.03	0.033	0.035	0.032	0.04	0.04	0.037	0.035	0.06	0.037	0.033	0.031		769	0.031
770	0.03	0.034	0.035	0.033	0.04	0.041	0.036	0.034	0.06	0.037	0.032	0.031		770	0.031
771	0.03	0.034	0.035	0.032	0.04	0.04	0.037	0.035	0.06	0.037	0.033	0.031		771	0.031
772	0.03	0.034	0.035	0.033	0.039	0.04	0.036	0.034	0.06	0.037	0.033	0.032		772	0.031
773	0.029	0.033	0.035	0.032	0.039	0.04	0.035	0.034	0.06	0.037	0.032	0.031		773	0.031
774	0.029	0.033	0.035	0.032	0.039	0.04	0.036	0.034	0.059	0.036	0.032	0.031		774	0.031
775	0.03	0.033	0.035	0.032	0.039	0.04	0.036	0.033	0.06	0.036	0.032	0.031		775	0.031
776	0.029	0.033	0.035	0.032	0.039	0.04	0.035	0.033	0.06	0.036	0.032	0.03		776	0.031
777	0.029	0.033	0.034	0.032	0.039	0.04	0.035	0.033	0.059	0.036	0.032	0.031		777	0.03
778	0.03	0.033	0.035	0.032	0.039	0.04	0.036	0.034	0.06	0.036	0.032	0.031		778	0.03
779	0.029	0.032	0.035	0.032	0.039	0.039	0.035	0.034	0.059	0.036	0.032	0.03		779	0.03
780	0.029	0.032	0.034	0.032	0.038	0.039	0.035	0.033	0.059	0.036	0.032	0.031		780	0.03
781	0.029	0.032	0.035	0.032	0.039	0.039	0.035	0.033	0.059	0.036	0.032	0.03		781	0.03
782	0.029	0.033	0.035	0.032	0.038	0.039	0.035	0.033	0.06	0.036	0.032	0.031		782	0.03
783	0.029	0.032	0.034	0.031	0.038	0.039	0.035	0.033	0.059	0.036	0.032	0.03		783	0.03
784	0.029	0.032	0.034	0.031	0.038	0.038	0.034	0.033	0.059	0.036	0.031	0.03		784	0.03
785	0.029	0.032	0.035	0.031	0.038	0.038	0.035	0.033	0.059	0.036	0.032	0.03		785	0.03
786	0.029	0.032	0.035	0.032	0.038	0.039	0.035	0.033	0.059	0.036	0.032	0.03		786	0.03
787	0.029	0.032	0.034	0.031	0.038	0.038	0.035	0.033	0.06	0.036	0.032	0.03		787	0.03
788	0.028	0.032	0.034	0.031	0.037	0.038	0.034	0.032	0.059	0.035	0.031	0.03		788	0.03
789	0.028	0.032	0.034	0.031	0.037	0.038	0.034	0.032	0.059	0.035	0.032	0.03		789	0.03
790	0.029	0.032	0.033	0.031	0.037	0.038	0.034	0.032	0.059	0.035	0.031	0.03		790	0.03
791	0.029	0.032	0.034	0.031	0.037	0.038	0.034	0.032	0.059	0.035	0.031	0.03		791	0.029
792	0.028	0.032	0.034	0.031	0.037	0.038	0.034	0.032	0.059	0.035	0.031	0.03		792	0.029
793	0.029	0.032	0.034	0.031	0.037	0.037	0.033	0.032	0.059	0.035	0.031	0.03		793	0.029
794	0.028	0.032	0.034	0.031	0.037	0.037	0.034	0.032	0.059	0.035	0.031	0.03		794	0.029
795	0.028	0.032	0.033	0.031	0.037	0.037	0.033	0.032	0.059	0.035	0.031	0.03		795	0.029
796	0.028	0.032	0.034	0.031	0.037	0.037	0.034	0.032	0.059	0.035	0.031	0.03		796	0.03
797	0.028	0.031	0.033	0.03	0.036	0.037	0.034	0.031	0.059	0.035	0.031	0.03		797	0.029
798	0.028	0.031	0.033	0.03	0.036	0.036	0.033	0.031	0.059	0.034	0.031	0.029		798	0.029
799	0.028	0.031	0.033	0.03	0.036	0.037	0.033	0.031	0.058	0.034	0.031	0.029		799	0.029
800	0.028	0.031	0.034	0.03	0.036	0.037	0.033	0.031	0.059	0.035	0.031	0.03		800	0.029
801	0.028	0.032	0.034	0.03	0.037	0.037	0.033	0.031	0.059	0.034	0.031	0.029		801	0.029
802	0.028	0.031	0.033	0.03	0.036	0.036	0.033	0.031	0.059	0.034	0.031	0.029		802	0.029
803	0.028	0.031	0.033	0.03	0.036	0.037	0.033	0.031	0.058	0.034	0.031	0.029		803	0.028
804	0.028	0.032	0.033	0.03	0.036	0.036	0.033	0.031	0.059	0.035	0.031	0.029		804	0.028
805	0.028	0.031	0.033	0.03	0.036	0.036	0.032	0.031	0.058	0.034	0.03	0.029		805	0.028
806	0.028	0.031	0.033	0.03	0.036	0.036	0.033	0.031	0.059	0.034	0.03	0.029		806	0.028
807	0.028	0.031	0.033	0.03	0.036	0.036	0.032	0.031	0.058	0.034	0.03	0.029		807	0.028
808	0.028	0.031	0.033	0.03	0.036	0.036	0.033	0.031	0.058	0.034	0.03	0.029		808	0.028
809	0.027	0.03	0.033	0.029	0.035	0.035	0.032	0.03	0.058	0.034	0.03	0.029		809	0.028
810	0.027	0.031	0.032	0.029	0.035	0.035	0.032	0.03	0.058	0.033	0.03	0.028		810	0.028
811	0.027	0.031	0.033	0.029	0.035	0.035	0.032	0.03	0.059	0.034	0.03	0.029		811	0.028
812	0.028	0.031	0.033	0.029	0.035	0.035	0.032	0.03	0.058	0.034	0.03	0.029		812	0.028
813	0.028	0.03	0.032	0.029	0.035	0.035	0.032	0.03	0.058	0.034	0.03	0.029		813	0.028
814	0.028	0.03	0.032	0.029	0.035	0.035	0.032	0.03	0.059	0.034	0.03	0.029		814	0.028
815	0.027	0.03	0.032	0.029	0.035	0.034	0.032	0.03	0.058	0.033	0.03	0.028		815	0.028
816	0.027	0.03	0.032	0.029	0.034	0.034	0.031	0.03	0.058	0.033	0.03	0.028		816	0.027
817	0.027	0.03	0.032	0.029	0.035	0.035	0.031	0.03	0.058	0.033	0.03	0.028		817	0.027
818	0.027	0.03	0.032	0.029	0.035	0.035	0.032	0.03	0.059	0.033	0.03	0.028		818	0.027
819	0.027	0.03	0.032	0.029	0.034	0.034	0.032	0.03	0.059	0.033	0.03	0.028		819	0.027
820	0.027	0.03	0.032	0.029	0.034	0.034	0.031	0.029	0.058	0.033	0.029	0.028		820	0.027
821	0.027	0.03	0.032	0.029	0.034	0.034	0.031	0.03	0.058	0.033	0.03	0.028		821	0.027
822	0.027	0.029	0.032	0.029	0.034	0.034	0.031	0.029	0.058	0.033	0.029	0.028		822	0.027
823	0.027	0.029	0.031	0.029	0.034	0.034	0.031	0.029	0.058	0.033	0.029	0.028		823	0.027
824	0.027	0.029	0.031	0.028	0.034	0.033	0.031	0.029	0.058	0.033	0.029	0.028		824	0.027
825	0.027	0.029	0.031	0.028	0.033	0.033	0.03	0.029	0.058	0.033	0.029	0.028		825	0.027
826	0.026	0.029	0.031	0.028	0.033	0.033	0.03	0.029	0.058	0.033	0.029	0.028		826	0.027
827	0.026	0.029	0.031	0.028	0.033	0.033	0.03	0.029	0.058	0.032	0.029	0.027		827	0.027
828	0.026	0.029	0.031	0.028	0.033	0.033	0.03	0.029	0.058	0.032	0.029	0.027		828	0.027
829	0.026	0.029	0.031	0.028	0.033	0.033	0.03	0.029	0.058	0.032	0.029	0.028		829	0.026
830	0.026	0.029	0.031	0.028	0.033	0.033	0.03	0.028	0.057	0.032	0.029	0.027		830	0.026
831	0.026	0.029	0.031	0.028	0.033	0.033	0.03	0.029	0.058	0.032	0.029	0.028		831	0.026
832	0.026	0.029	0.03	0.028	0.033	0.032	0.029	0.028	0.057	0.032	0.028	0.027		832	0.026
833	0.026	0.029	0.031	0.028	0.033	0.032	0.03	0.028	0.058	0.032	0.029	0.028		833	0.025
834	0.026	0.029	0.031	0.028	0.033	0.032	0.029	0.028	0.058	0.032	0.029	0.027		834	0.026
835	0.026	0.028	0.03	0.027	0.032	0.032	0.03	0.028	0.057	0.032	0.029	0.027		835	0.025
836	0.026	0.028	0.03	0.027	0.032	0.032	0.029	0.028	0.058	0.032	0.029	0.027		836	0.026
837	0.025	0.028	0.03	0.027	0.032	0.032	0.029	0.027	0.057	0.032	0.028	0.027		837	0.025
838	0.025	0.028	0.029	0.027	0.032	0.031	0.029	0.027	0.057	0.031	0.028	0.026		838	0.025
839	0.025	0.028	0.03	0.027	0.032	0.031	0.029	0.027	0.057	0.031	0.028	0.027		839	0.025
840	0.025	0.028	0.03	0.027	0.032	0.031	0.029	0.027	0.057	0.031	0.028	0.026		840	0.025
841	0.026	0.028	0.03	0.028	0.032	0.031	0.029	0.028	0.057	0.032	0.028	0.027		841	0.025
842	0.025	0.028	0.03	0.027	0.032	0.031	0.029	0.027	0.057	0.031	0.028	0.027		842	0.025
843	0.025	0.028	0.03	0.027	0.031	0.031	0.029	0.027	0.057	0.031	0.028	0.026		843	0.025
844	0.025	0.028	0.03	0.027	0.031	0.031	0.029	0.027	0.057	0.031	0.028	0.026		844	0.025
845	0.025	0.028	0.03	0.027	0.031	0.031	0.029	0.027	0.058	0.031	0.028	0.027		845	0.025
846	0.025	0.028	0.03	0.027	0.031	0.031	0.028	0.027	0.057	0.031	0.028	0.027		846	0.024
847	0.025	0.027	0.029	0.027	0.03	0.03	0.028	0.027	0.057	0.03	0.028	0.026		847	0.025
848	0.025	0.028	0.029	0.027	0.031	0.03	0.028	0.027	0.057	0.031	0.027	0.027		848	0.025
849	0.025	0.028	0.03	0.027	0.031	0.03	0.028	0.027	0.057	0.031	0.028	0.027		849	0.024
850	0.025	0.027	0.029	0.027	0.031	0.03	0.028	0.026	0.057	0.03	0.028	0.026		850	0.024
851	0.025	0.027	0.029	0.026	0.03	0.029	0.028	0.026	0.056	0.03	0.027	0.026		851	0.024
852	0.024	0.027	0.029	0.026	0.031	0.03	0.028	0.026	0.056	0.03	0.027	0.026		852	0.024
853	0.024	0.028	0.029	0.026	0.031	0.03	0.028	0.026	0.056	0.03	0.027	0.026		853	0.024
854	0.024	0.027	0.029	0.026	0.03	0.029	0.028	0.026	0.056	0.03	0.027	0.026		854	0.024
855	0.024	0.027	0.029	0.026	0.03	0.029	0.028	0.026	0.056	0.03	0.027	0.026		855	0.024
856	0.024	0.027	0.029	0.026	0.03	0.029	0.028	0.026	0.056	0.03	0.027	0.026		856	0.024
857	0.024	0.027	0.029	0.026	0.03	0.029	0.027	0.026	0.057	0.03	0.027	0.026		857	0.023
858	0.024	0.027	0.029	0.026	0.03	0.029	0.028	0.026	0.056	0.03	0.027	0.026		858	0.023
859	0.024	0.027	0.029	0.026	0.03	0.028	0.028	0.026	0.056	0.03	0.027	0.026		859	0.024
860	0.024	0.027	0.029	0.026	0.03	0.029	0.027	0.026	0.056	0.03	0.027	0.026		860	0.023
861	0.024	0.027	0.028	0.025	0.029	0.029	0.027	0.026	0.056	0.03	0.026	0.025		861	0.023
862	0.024	0.027	0.028	0.025	0.029	0.028	0.027	0.025	0.056	0.029	0.026	0.025		862	0.022
863	0.024	0.027	0.028	0.026	0.029	0.028	0.028	0.025	0.056	0.03	0.027	0.026		863	0.023
864	0.023	0.026	0.028	0.026	0.029	0.028	0.027	0.025	0.056	0.029	0.026	0.025		864	0.023
865	0.024	0.026	0.028	0.026	0.029	0.028	0.027	0.025	0.056	0.03	0.026	0.025		865	0.023
866	0.023	0.026	0.028	0.025	0.029	0.028	0.027	0.025	0.056	0.029	0.026	0.025		866	0.023
867	0.024	0.026	0.028	0.025	0.028	0.027	0.027	0.025	0.056	0.029	0.026	0.025		867	0.023
868	0.023	0.026	0.028	0.025	0.028	0.027	0.027	0.025	0.056	0.029	0.026	0.025		868	0.022
869	0.023	0.026	0.028	0.025	0.029	0.028	0.027	0.025	0.055	0.029	0.026	0.025		869	0.022
870	0.023	0.026	0.028	0.025	0.028	0.027	0.026	0.025	0.055	0.029	0.026	0.025		870	0.022
871	0.023	0.026	0.027	0.024	0.028	0.027	0.027	0.024	0.055	0.029	0.026	0.024		871	0.022
872	0.023	0.026	0.028	0.025	0.029	0.027	0.026	0.024	0.055	0.029	0.026	0.025		872	0.022
873	0.023	0.026	0.027	0.025	0.028	0.027	0.026	0.024	0.056	0.029	0.026	0.025		873	0.022
874	0.023	0.026	0.027	0.025	0.027	0.027	0.026	0.024	0.055	0.029	0.025	0.024		874	0.022
875	0.024	0.026	0.027	0.025	0.028	0.027	0.026	0.025	0.055	0.029	0.026	0.025		875	0.022
876	0.023	0.026	0.027	0.025	0.028	0.027	0.026	0.024	0.055	0.028	0.025	0.024		876	0.022
877	0.023	0.025	0.027	0.024	0.028	0.026	0.026	0.024	0.055	0.029	0.025	0.024		877	0.022
878	0.023	0.026	0.028	0.025	0.028	0.027	0.026	0.024	0.056	0.028	0.026	0.025		878	0.021
879	0.023	0.025	0.027	0.024	0.027	0.026	0.026	0.024	0.055	0.029	0.026	0.024		879	0.021
880	0.023	0.025	0.027	0.024	0.027	0.026	0.026	0.024	0.055	0.028	0.025	0.025		880	0.021
881	0.022	0.025	0.027	0.024	0.027	0.026	0.025	0.024	0.055	0.028	0.025	0.024		881	0.021
882	0.022	0.025	0.027	0.024	0.027	0.026	0.025	0.023	0.055	0.028	0.025	0.024		882	0.021
883	0.022	0.025	0.027	0.024	0.027	0.026	0.025	0.024	0.055	0.028	0.025	0.024		883	0.021
884	0.022	0.025	0.027	0.024	0.027	0.026	0.025	0.023	0.055	0.028	0.025	0.024		884	0.021
885	0.022	0.025	0.026	0.024	0.026	0.025	0.026	0.023	0.055	0.028	0.025	0.024		885	0.021
886	0.021	0.024	0.026	0.023	0.026	0.025	0.025	0.023	0.054	0.027	0.025	0.024		886	0.021
887	0.022	0.024	0.026	0.023	0.027	0.026	0.025	0.023	0.054	0.028	0.025	0.024		887	0.02
888	0.022	0.024	0.026	0.023	0.026	0.025	0.025	0.023	0.054	0.027	0.024	0.024		888	0.02
889	0.021	0.024	0.026	0.023	0.026	0.025	0.025	0.023	0.054	0.027	0.024	0.024		889	0.02
890	0.022	0.024	0.026	0.023	0.026	0.025	0.025	0.023	0.054	0.027	0.024	0.024		890	0.02
891	0.022	0.024	0.026	0.023	0.026	0.025	0.026	0.023	0.054	0.027	0.024	0.023		891	0.02
892	0.022	0.024	0.026	0.023	0.026	0.025	0.025	0.023	0.055	0.028	0.025	0.023		892	0.02
893	0.021	0.024	0.026	0.023	0.025	0.025	0.025	0.023	0.054	0.027	0.024	0.024		893	0.019
894	0.021	0.024	0.026	0.023	0.025	0.024	0.025	0.022	0.054	0.027	0.024	0.023		894	0.02
895	0.021	0.024	0.026	0.023	0.026	0.025	0.025	0.022	0.054	0.027	0.024	0.024		895	0.019
896	0.021	0.023	0.025	0.023	0.025	0.024	0.025	0.022	0.054	0.027	0.024	0.023		896	0.02
897	0.021	0.023	0.025	0.023	0.025	0.024	0.025	0.022	0.054	0.027	0.024	0.023		897	0.019
898	0.021	0.024	0.026	0.023	0.025	0.024	0.025	0.023	0.054	0.027	0.024	0.023		898	0.019
899	0.021	0.023	0.025	0.023	0.025	0.024	0.025	0.022	0.054	0.027	0.024	0.023		899	0.019
900	0.021	0.023	0.025	0.022	0.025	0.023	0.025	0.022	0.054	0.026	0.023	0.023		900	0.019

## Sheet: Sheet2
Wavelength	B2	B8	C2	C8	D2	D8	E2	E8	F2	F8	G2	G8
300	0.064	0.08	0.066	0.075	0.093	0.064	0.049	0.063	0.01	0.073	0.031	0.081
301	0.064	0.078	0.068	0.075	0.09	0.065	0.05	0.064	0.012	0.074	0.032	0.079
302	0.065	0.078	0.068	0.076	0.09	0.065	0.05	0.064	0.014	0.076	0.031	0.08
303	0.064	0.075	0.066	0.074	0.089	0.062	0.049	0.063	0.014	0.074	0.031	0.077
304	0.063	0.074	0.065	0.073	0.088	0.062	0.048	0.061	0.014	0.073	0.031	0.076
305	0.061	0.073	0.064	0.072	0.086	0.06	0.046	0.06	0.014	0.071	0.03	0.074
306	0.059	0.071	0.062	0.07	0.085	0.059	0.046	0.058	0.013	0.07	0.029	0.072
307	0.059	0.069	0.06	0.069	0.083	0.058	0.045	0.057	0.013	0.068	0.029	0.071
308	0.058	0.068	0.059	0.067	0.081	0.057	0.044	0.056	0.013	0.067	0.028	0.069
309	0.056	0.067	0.057	0.066	0.08	0.056	0.043	0.055	0.013	0.066	0.027	0.068
310	0.055	0.066	0.056	0.065	0.079	0.055	0.042	0.054	0.014	0.065	0.027	0.066
311	0.054	0.064	0.055	0.063	0.078	0.053	0.041	0.052	0.013	0.064	0.026	0.065
312	0.053	0.063	0.054	0.062	0.077	0.052	0.04	0.051	0.013	0.063	0.026	0.064
313	0.052	0.062	0.053	0.061	0.076	0.052	0.039	0.051	0.014	0.062	0.025	0.063
314	0.051	0.06	0.051	0.059	0.074	0.05	0.038	0.049	0.013	0.06	0.025	0.061
315	0.05	0.059	0.051	0.058	0.074	0.049	0.038	0.048	0.013	0.06	0.025	0.06
316	0.049	0.058	0.05	0.057	0.073	0.049	0.037	0.048	0.014	0.059	0.024	0.059
317	0.048	0.057	0.049	0.057	0.072	0.048	0.037	0.047	0.014	0.058	0.024	0.059
318	0.048	0.057	0.049	0.056	0.071	0.048	0.036	0.047	0.014	0.058	0.024	0.058
319	0.048	0.056	0.049	0.055	0.07	0.047	0.036	0.046	0.014	0.057	0.024	0.057
320	0.047	0.056	0.048	0.055	0.07	0.047	0.036	0.046	0.014	0.056	0.024	0.056
321	0.048	0.056	0.048	0.055	0.07	0.047	0.036	0.046	0.014	0.056	0.024	0.056
322	0.048	0.056	0.048	0.055	0.07	0.047	0.036	0.046	0.015	0.056	0.024	0.056
323	0.048	0.056	0.049	0.055	0.07	0.048	0.037	0.046	0.015	0.056	0.025	0.056
324	0.048	0.056	0.049	0.055	0.071	0.048	0.037	0.046	0.015	0.056	0.025	0.056
325	0.049	0.056	0.05	0.056	0.071	0.048	0.037	0.047	0.015	0.056	0.025	0.056
326	0.05	0.057	0.051	0.057	0.072	0.05	0.038	0.048	0.016	0.057	0.026	0.057
327	0.051	0.058	0.052	0.058	0.074	0.051	0.039	0.049	0.016	0.058	0.027	0.057
328	0.052	0.059	0.053	0.059	0.074	0.052	0.04	0.05	0.016	0.059	0.027	0.058
329	0.054	0.061	0.055	0.061	0.076	0.054	0.041	0.051	0.017	0.06	0.028	0.06
330	0.056	0.063	0.057	0.063	0.077	0.056	0.043	0.053	0.017	0.061	0.029	0.061
331	0.058	0.065	0.059	0.065	0.079	0.058	0.045	0.055	0.018	0.063	0.03	0.063
332	0.06	0.067	0.061	0.067	0.081	0.06	0.047	0.057	0.019	0.065	0.031	0.065
333	0.062	0.068	0.063	0.069	0.083	0.063	0.048	0.058	0.019	0.066	0.032	0.066
334	0.065	0.07	0.065	0.071	0.085	0.065	0.05	0.06	0.019	0.068	0.034	0.068
335	0.067	0.072	0.068	0.073	0.087	0.067	0.052	0.062	0.02	0.07	0.035	0.07
336	0.069	0.074	0.07	0.075	0.089	0.069	0.053	0.064	0.021	0.071	0.036	0.072
337	0.071	0.076	0.072	0.077	0.091	0.071	0.055	0.066	0.021	0.073	0.037	0.073
338	0.073	0.078	0.074	0.079	0.092	0.073	0.057	0.068	0.021	0.075	0.038	0.075
339	0.075	0.079	0.076	0.081	0.094	0.075	0.058	0.07	0.022	0.076	0.039	0.077
340	0.077	0.081	0.078	0.083	0.096	0.077	0.06	0.071	0.022	0.078	0.041	0.078
341	0.079	0.083	0.08	0.085	0.098	0.079	0.061	0.073	0.023	0.079	0.042	0.08
342	0.081	0.084	0.082	0.087	0.099	0.081	0.063	0.075	0.023	0.081	0.043	0.081
343	0.082	0.086	0.083	0.088	0.101	0.083	0.064	0.076	0.023	0.082	0.043	0.082
344	0.084	0.087	0.085	0.089	0.102	0.084	0.066	0.078	0.023	0.084	0.044	0.084
345	0.086	0.088	0.087	0.091	0.103	0.086	0.067	0.079	0.024	0.085	0.045	0.085
346	0.087	0.09	0.088	0.093	0.105	0.088	0.068	0.08	0.024	0.086	0.046	0.086
347	0.089	0.091	0.089	0.094	0.106	0.089	0.069	0.082	0.024	0.087	0.047	0.087
348	0.09	0.092	0.091	0.095	0.107	0.09	0.07	0.083	0.025	0.089	0.047	0.088
349	0.092	0.094	0.092	0.097	0.108	0.092	0.071	0.084	0.025	0.09	0.048	0.089
350	0.093	0.094	0.093	0.098	0.109	0.093	0.072	0.085	0.025	0.09	0.049	0.09
351	0.094	0.096	0.094	0.099	0.11	0.094	0.073	0.086	0.025	0.091	0.049	0.091
352	0.095	0.097	0.095	0.1	0.111	0.095	0.074	0.087	0.025	0.092	0.05	0.092
353	0.096	0.098	0.097	0.102	0.112	0.096	0.075	0.088	0.025	0.093	0.051	0.093
354	0.097	0.098	0.098	0.102	0.113	0.097	0.076	0.089	0.026	0.094	0.051	0.094
355	0.098	0.1	0.099	0.104	0.114	0.099	0.077	0.09	0.026	0.095	0.052	0.094
356	0.099	0.1	0.1	0.105	0.114	0.1	0.078	0.091	0.026	0.096	0.052	0.095
357	0.1	0.101	0.101	0.106	0.115	0.101	0.079	0.092	0.026	0.096	0.053	0.096
358	0.101	0.102	0.102	0.107	0.117	0.102	0.08	0.093	0.027	0.097	0.054	0.097
359	0.102	0.103	0.103	0.107	0.118	0.103	0.08	0.094	0.027	0.097	0.054	0.098
360	0.104	0.104	0.105	0.109	0.118	0.104	0.082	0.095	0.027	0.098	0.055	0.099
361	0.105	0.105	0.106	0.11	0.119	0.105	0.083	0.096	0.028	0.099	0.056	0.099
362	0.106	0.106	0.107	0.111	0.12	0.106	0.084	0.097	0.028	0.099	0.056	0.1
363	0.106	0.106	0.107	0.111	0.123	0.107	0.084	0.098	0.029	0.1	0.057	0.1
364	0.108	0.107	0.109	0.112	0.123	0.109	0.086	0.099	0.029	0.1	0.058	0.101
365	0.109	0.108	0.111	0.114	0.124	0.11	0.087	0.1	0.03	0.101	0.059	0.102
366	0.11	0.109	0.112	0.114	0.125	0.111	0.088	0.101	0.031	0.102	0.059	0.103
367	0.111	0.11	0.113	0.115	0.126	0.112	0.088	0.102	0.031	0.102	0.06	0.103
368	0.113	0.11	0.114	0.116	0.128	0.114	0.09	0.103	0.032	0.102	0.061	0.104
369	0.114	0.111	0.115	0.117	0.128	0.115	0.091	0.104	0.032	0.103	0.062	0.105
370	0.115	0.112	0.117	0.117	0.129	0.116	0.092	0.104	0.032	0.103	0.062	0.105
371	0.116	0.113	0.118	0.118	0.13	0.117	0.092	0.105	0.033	0.104	0.063	0.106
372	0.117	0.113	0.119	0.119	0.131	0.118	0.093	0.106	0.033	0.104	0.063	0.107
373	0.118	0.114	0.12	0.12	0.132	0.119	0.094	0.106	0.033	0.105	0.064	0.107
374	0.119	0.115	0.121	0.121	0.133	0.119	0.095	0.107	0.034	0.106	0.065	0.108
375	0.12	0.116	0.122	0.122	0.133	0.12	0.096	0.108	0.034	0.106	0.065	0.108
376	0.121	0.116	0.122	0.122	0.134	0.121	0.096	0.109	0.034	0.107	0.066	0.109
377	0.121	0.117	0.124	0.123	0.135	0.122	0.097	0.11	0.034	0.107	0.066	0.11
378	0.122	0.118	0.124	0.124	0.135	0.123	0.098	0.11	0.035	0.108	0.067	0.111
379	0.123	0.118	0.125	0.125	0.137	0.124	0.098	0.111	0.035	0.109	0.067	0.111
380	0.124	0.119	0.126	0.126	0.137	0.125	0.099	0.112	0.035	0.11	0.068	0.112
381	0.125	0.12	0.127	0.126	0.138	0.125	0.099	0.112	0.035	0.11	0.068	0.112
382	0.125	0.121	0.128	0.127	0.138	0.126	0.1	0.113	0.035	0.111	0.068	0.113
383	0.127	0.121	0.129	0.128	0.138	0.127	0.101	0.114	0.036	0.112	0.069	0.114
384	0.127	0.122	0.129	0.128	0.139	0.128	0.101	0.114	0.035	0.112	0.069	0.114
385	0.128	0.123	0.13	0.129	0.14	0.128	0.102	0.115	0.036	0.113	0.069	0.115
386	0.129	0.123	0.13	0.129	0.141	0.129	0.102	0.116	0.036	0.113	0.07	0.115
387	0.129	0.124	0.131	0.131	0.141	0.13	0.103	0.116	0.036	0.114	0.07	0.116
388	0.13	0.125	0.132	0.131	0.142	0.13	0.104	0.117	0.036	0.115	0.071	0.117
389	0.131	0.126	0.133	0.132	0.143	0.131	0.104	0.118	0.036	0.115	0.071	0.117
390	0.131	0.126	0.133	0.133	0.143	0.132	0.105	0.118	0.036	0.116	0.071	0.118
391	0.132	0.127	0.134	0.133	0.143	0.133	0.105	0.119	0.036	0.116	0.072	0.119
392	0.133	0.127	0.134	0.133	0.144	0.133	0.105	0.119	0.036	0.117	0.072	0.118
393	0.133	0.128	0.135	0.134	0.145	0.134	0.106	0.12	0.036	0.117	0.072	0.119
394	0.134	0.129	0.136	0.135	0.145	0.134	0.107	0.121	0.036	0.117	0.073	0.119
395	0.134	0.129	0.136	0.136	0.145	0.135	0.107	0.121	0.036	0.118	0.073	0.12
396	0.135	0.13	0.137	0.136	0.146	0.136	0.108	0.122	0.037	0.118	0.073	0.121
397	0.136	0.13	0.137	0.137	0.146	0.136	0.108	0.122	0.036	0.119	0.074	0.121
398	0.136	0.131	0.138	0.138	0.147	0.137	0.108	0.122	0.036	0.119	0.074	0.121
399	0.137	0.132	0.139	0.138	0.147	0.137	0.109	0.123	0.037	0.12	0.074	0.122
400	0.138	0.132	0.14	0.139	0.148	0.138	0.11	0.124	0.037	0.121	0.075	0.122
401	0.138	0.132	0.14	0.14	0.148	0.138	0.11	0.124	0.036	0.121	0.075	0.123
402	0.139	0.133	0.141	0.14	0.148	0.139	0.11	0.124	0.037	0.121	0.075	0.123
403	0.139	0.133	0.141	0.14	0.149	0.139	0.111	0.125	0.036	0.121	0.075	0.123
404	0.14	0.134	0.142	0.141	0.149	0.14	0.111	0.125	0.036	0.122	0.075	0.124
405	0.14	0.134	0.142	0.142	0.15	0.14	0.111	0.126	0.036	0.122	0.076	0.124
406	0.14	0.135	0.142	0.142	0.15	0.141	0.112	0.126	0.037	0.122	0.076	0.125
407	0.141	0.136	0.143	0.143	0.151	0.141	0.112	0.127	0.037	0.123	0.076	0.125
408	0.141	0.136	0.143	0.143	0.151	0.141	0.112	0.127	0.036	0.123	0.076	0.125
409	0.142	0.137	0.144	0.144	0.151	0.142	0.113	0.127	0.037	0.124	0.076	0.126
410	0.142	0.137	0.144	0.144	0.152	0.143	0.113	0.128	0.036	0.124	0.076	0.126
411	0.143	0.137	0.145	0.145	0.152	0.143	0.114	0.128	0.036	0.124	0.077	0.127
412	0.143	0.138	0.145	0.145	0.153	0.144	0.114	0.129	0.036	0.124	0.077	0.127
413	0.144	0.139	0.146	0.147	0.153	0.145	0.115	0.13	0.036	0.125	0.077	0.128
414	0.144	0.139	0.146	0.147	0.153	0.145	0.115	0.13	0.036	0.125	0.077	0.128
415	0.145	0.139	0.147	0.147	0.154	0.145	0.115	0.13	0.037	0.126	0.078	0.129
416	0.146	0.14	0.147	0.148	0.154	0.146	0.116	0.131	0.036	0.126	0.078	0.129
417	0.146	0.14	0.148	0.148	0.155	0.146	0.116	0.131	0.037	0.127	0.078	0.13
418	0.146	0.141	0.148	0.149	0.155	0.147	0.116	0.132	0.036	0.127	0.078	0.13
419	0.147	0.141	0.149	0.15	0.155	0.147	0.117	0.132	0.036	0.127	0.078	0.13
420	0.147	0.141	0.149	0.15	0.156	0.148	0.117	0.132	0.036	0.128	0.079	0.131
421	0.148	0.142	0.15	0.15	0.156	0.148	0.117	0.133	0.036	0.128	0.079	0.131
422	0.148	0.142	0.15	0.151	0.157	0.148	0.118	0.133	0.036	0.128	0.079	0.132
423	0.148	0.143	0.151	0.151	0.157	0.149	0.118	0.134	0.036	0.129	0.079	0.132
424	0.149	0.143	0.151	0.151	0.158	0.15	0.118	0.134	0.037	0.129	0.079	0.133
425	0.149	0.144	0.151	0.152	0.158	0.15	0.119	0.134	0.036	0.129	0.079	0.133
426	0.15	0.144	0.152	0.152	0.159	0.15	0.119	0.135	0.036	0.13	0.079	0.133
427	0.15	0.144	0.152	0.153	0.159	0.151	0.119	0.135	0.036	0.13	0.08	0.134
428	0.151	0.145	0.153	0.153	0.16	0.151	0.119	0.136	0.036	0.131	0.08	0.135
429	0.151	0.145	0.153	0.153	0.16	0.152	0.12	0.136	0.037	0.131	0.08	0.135
430	0.151	0.146	0.154	0.154	0.16	0.153	0.12	0.137	0.036	0.132	0.08	0.136
431	0.152	0.146	0.154	0.154	0.16	0.153	0.121	0.137	0.037	0.132	0.081	0.136
432	0.153	0.147	0.155	0.154	0.161	0.154	0.122	0.138	0.037	0.133	0.081	0.137
433	0.153	0.147	0.155	0.155	0.161	0.154	0.121	0.139	0.037	0.133	0.081	0.137
434	0.154	0.147	0.155	0.156	0.162	0.154	0.121	0.139	0.037	0.133	0.081	0.137
435	0.153	0.147	0.156	0.155	0.161	0.154	0.122	0.138	0.036	0.133	0.081	0.138
436	0.155	0.148	0.156	0.156	0.162	0.154	0.122	0.139	0.037	0.134	0.081	0.139
437	0.156	0.148	0.157	0.157	0.162	0.156	0.123	0.14	0.037	0.135	0.082	0.139
438	0.155	0.149	0.158	0.157	0.163	0.156	0.123	0.14	0.037	0.135	0.082	0.14
439	0.156	0.149	0.158	0.157	0.163	0.157	0.123	0.14	0.037	0.135	0.082	0.14
440	0.156	0.149	0.158	0.158	0.162	0.157	0.124	0.141	0.037	0.135	0.083	0.14
441	0.157	0.15	0.159	0.159	0.164	0.158	0.125	0.142	0.037	0.136	0.083	0.141
442	0.157	0.15	0.159	0.159	0.164	0.158	0.124	0.142	0.037	0.137	0.083	0.141
443	0.158	0.151	0.16	0.159	0.165	0.158	0.125	0.142	0.037	0.137	0.083	0.142
444	0.158	0.151	0.16	0.16	0.165	0.159	0.125	0.143	0.037	0.137	0.083	0.142
445	0.159	0.152	0.161	0.16	0.165	0.16	0.126	0.143	0.037	0.138	0.084	0.143
446	0.159	0.152	0.161	0.16	0.165	0.16	0.126	0.143	0.037	0.138	0.084	0.143
447	0.159	0.152	0.162	0.161	0.166	0.161	0.126	0.144	0.037	0.139	0.084	0.143
448	0.159	0.152	0.162	0.161	0.167	0.161	0.126	0.144	0.037	0.139	0.084	0.144
449	0.16	0.153	0.162	0.162	0.167	0.161	0.127	0.144	0.037	0.139	0.085	0.144
450	0.161	0.153	0.163	0.162	0.167	0.162	0.127	0.145	0.037	0.14	0.085	0.145
451	0.161	0.154	0.163	0.163	0.167	0.162	0.128	0.145	0.037	0.14	0.085	0.145
452	0.162	0.154	0.164	0.163	0.168	0.163	0.128	0.146	0.037	0.141	0.085	0.145
453	0.162	0.155	0.164	0.164	0.168	0.163	0.128	0.146	0.038	0.141	0.086	0.146
454	0.162	0.155	0.164	0.164	0.168	0.164	0.128	0.146	0.037	0.142	0.086	0.146
455	0.163	0.156	0.165	0.165	0.169	0.164	0.129	0.147	0.037	0.142	0.086	0.147
456	0.163	0.156	0.166	0.165	0.169	0.165	0.13	0.147	0.037	0.142	0.086	0.147
457	0.164	0.157	0.166	0.166	0.169	0.165	0.13	0.148	0.038	0.143	0.087	0.148
458	0.164	0.157	0.166	0.166	0.169	0.165	0.13	0.148	0.037	0.143	0.086	0.148
459	0.165	0.158	0.167	0.167	0.17	0.166	0.131	0.148	0.037	0.144	0.087	0.149
460	0.165	0.158	0.167	0.167	0.17	0.166	0.131	0.148	0.037	0.144	0.087	0.149
461	0.166	0.159	0.168	0.168	0.171	0.167	0.131	0.149	0.038	0.145	0.088	0.15
462	0.166	0.16	0.168	0.169	0.171	0.167	0.132	0.149	0.037	0.145	0.088	0.15
463	0.166	0.159	0.169	0.169	0.172	0.168	0.132	0.151	0.037	0.145	0.088	0.151
464	0.166	0.16	0.169	0.17	0.171	0.168	0.133	0.151	0.037	0.145	0.088	0.151
465	0.168	0.16	0.17	0.17	0.173	0.169	0.133	0.151	0.038	0.147	0.089	0.151
466	0.168	0.161	0.171	0.171	0.172	0.169	0.133	0.151	0.037	0.146	0.089	0.151
467	0.169	0.162	0.171	0.171	0.173	0.17	0.134	0.152	0.037	0.147	0.089	0.152
468	0.169	0.162	0.171	0.172	0.173	0.17	0.133	0.152	0.037	0.148	0.089	0.152
469	0.169	0.162	0.171	0.172	0.174	0.17	0.135	0.152	0.037	0.148	0.089	0.152
470	0.17	0.163	0.172	0.173	0.175	0.17	0.135	0.153	0.037	0.148	0.089	0.153
471	0.171	0.165	0.173	0.175	0.175	0.172	0.136	0.154	0.038	0.149	0.09	0.154
472	0.171	0.165	0.174	0.175	0.175	0.172	0.136	0.154	0.038	0.149	0.091	0.154
473	0.172	0.165	0.174	0.176	0.175	0.172	0.136	0.155	0.037	0.15	0.091	0.155
474	0.172	0.166	0.175	0.177	0.176	0.173	0.137	0.155	0.038	0.15	0.091	0.155
475	0.173	0.167	0.175	0.177	0.177	0.174	0.138	0.156	0.038	0.151	0.091	0.156
476	0.173	0.167	0.176	0.177	0.177	0.174	0.138	0.156	0.037	0.151	0.091	0.156
477	0.174	0.167	0.176	0.178	0.177	0.174	0.138	0.157	0.037	0.151	0.091	0.156
478	0.175	0.168	0.178	0.179	0.178	0.175	0.139	0.158	0.037	0.152	0.092	0.157
479	0.176	0.169	0.178	0.18	0.179	0.175	0.139	0.158	0.037	0.152	0.092	0.157
480	0.176	0.17	0.178	0.18	0.179	0.176	0.14	0.159	0.037	0.153	0.093	0.158
481	0.178	0.171	0.18	0.181	0.18	0.177	0.141	0.16	0.037	0.154	0.093	0.159
482	0.179	0.172	0.181	0.182	0.181	0.178	0.142	0.161	0.038	0.155	0.094	0.16
483	0.179	0.172	0.181	0.183	0.181	0.179	0.142	0.161	0.037	0.155	0.094	0.16
484	0.179	0.173	0.181	0.183	0.182	0.179	0.142	0.161	0.037	0.155	0.094	0.16
485	0.179	0.173	0.182	0.184	0.183	0.179	0.142	0.162	0.037	0.155	0.094	0.161
486	0.18	0.173	0.182	0.184	0.183	0.179	0.143	0.162	0.037	0.156	0.094	0.161
487	0.182	0.175	0.184	0.186	0.184	0.181	0.144	0.164	0.037	0.157	0.095	0.162
488	0.182	0.176	0.184	0.187	0.185	0.181	0.144	0.164	0.037	0.157	0.095	0.163
489	0.182	0.176	0.185	0.187	0.185	0.182	0.145	0.165	0.037	0.157	0.095	0.163
490	0.183	0.177	0.186	0.189	0.186	0.183	0.146	0.165	0.037	0.158	0.096	0.164
491	0.185	0.178	0.187	0.189	0.186	0.184	0.146	0.167	0.038	0.159	0.097	0.165
492	0.185	0.179	0.188	0.191	0.188	0.185	0.147	0.168	0.038	0.16	0.097	0.166
493	0.185	0.179	0.188	0.191	0.189	0.184	0.147	0.167	0.037	0.16	0.097	0.166
494	0.186	0.18	0.189	0.191	0.189	0.185	0.148	0.168	0.038	0.16	0.097	0.166
495	0.187	0.18	0.19	0.192	0.189	0.186	0.148	0.169	0.038	0.161	0.097	0.167
496	0.188	0.181	0.191	0.193	0.19	0.187	0.149	0.17	0.038	0.162	0.098	0.168
497	0.188	0.182	0.191	0.194	0.19	0.188	0.149	0.17	0.037	0.162	0.098	0.168
498	0.189	0.182	0.191	0.194	0.191	0.188	0.15	0.171	0.038	0.162	0.098	0.168
499	0.189	0.183	0.192	0.194	0.191	0.188	0.15	0.171	0.037	0.163	0.098	0.169
500	0.19	0.183	0.193	0.195	0.192	0.189	0.15	0.172	0.038	0.163	0.099	0.169
501	0.19	0.183	0.193	0.195	0.192	0.189	0.151	0.172	0.038	0.163	0.099	0.17
502	0.19	0.184	0.193	0.196	0.192	0.19	0.151	0.172	0.038	0.163	0.099	0.17
503	0.191	0.184	0.194	0.196	0.192	0.19	0.151	0.172	0.038	0.163	0.099	0.17
504	0.191	0.184	0.194	0.196	0.193	0.19	0.151	0.173	0.038	0.164	0.099	0.17
505	0.191	0.185	0.194	0.197	0.193	0.191	0.152	0.173	0.038	0.164	0.099	0.171
506	0.191	0.185	0.194	0.197	0.193	0.191	0.152	0.173	0.038	0.164	0.099	0.171
507	0.192	0.185	0.195	0.197	0.193	0.191	0.152	0.174	0.038	0.164	0.099	0.171
508	0.192	0.185	0.195	0.197	0.193	0.191	0.152	0.174	0.038	0.164	0.1	0.171
509	0.192	0.185	0.195	0.197	0.193	0.191	0.152	0.174	0.038	0.164	0.099	0.171
510	0.191	0.185	0.194	0.197	0.193	0.191	0.152	0.174	0.038	0.164	0.099	0.171
511	0.191	0.185	0.194	0.197	0.193	0.191	0.151	0.173	0.038	0.164	0.099	0.171
512	0.191	0.184	0.194	0.196	0.193	0.19	0.151	0.173	0.038	0.164	0.099	0.171
513	0.191	0.184	0.194	0.196	0.193	0.19	0.151	0.173	0.038	0.163	0.099	0.17
514	0.191	0.184	0.194	0.196	0.192	0.19	0.151	0.173	0.038	0.163	0.099	0.17
515	0.19	0.183	0.193	0.195	0.192	0.189	0.15	0.173	0.038	0.163	0.099	0.17
516	0.19	0.183	0.193	0.195	0.192	0.189	0.15	0.172	0.038	0.163	0.098	0.169
517	0.189	0.183	0.192	0.194	0.191	0.189	0.15	0.172	0.038	0.162	0.098	0.169
518	0.189	0.182	0.192	0.194	0.19	0.188	0.149	0.171	0.038	0.162	0.098	0.168
519	0.188	0.181	0.191	0.193	0.19	0.187	0.149	0.171	0.038	0.161	0.097	0.168
520	0.187	0.181	0.19	0.192	0.19	0.186	0.148	0.17	0.038	0.161	0.097	0.167
521	0.186	0.18	0.189	0.191	0.189	0.186	0.148	0.169	0.038	0.16	0.097	0.166
522	0.185	0.179	0.189	0.191	0.188	0.185	0.147	0.169	0.038	0.159	0.096	0.166
523	0.185	0.178	0.188	0.19	0.187	0.184	0.146	0.168	0.039	0.159	0.096	0.165
524	0.184	0.177	0.187	0.189	0.186	0.183	0.145	0.167	0.038	0.158	0.095	0.164
525	0.183	0.176	0.186	0.188	0.185	0.182	0.145	0.166	0.038	0.157	0.095	0.163
526	0.182	0.175	0.184	0.186	0.185	0.181	0.144	0.165	0.038	0.157	0.094	0.162
527	0.18	0.174	0.184	0.185	0.183	0.18	0.143	0.164	0.039	0.156	0.094	0.162
528	0.179	0.173	0.182	0.184	0.182	0.179	0.142	0.164	0.039	0.155	0.093	0.161
529	0.178	0.172	0.181	0.183	0.182	0.178	0.141	0.163	0.038	0.154	0.093	0.16
530	0.177	0.171	0.181	0.182	0.182	0.177	0.14	0.162	0.038	0.153	0.092	0.159
531	0.176	0.17	0.179	0.181	0.18	0.176	0.139	0.16	0.038	0.152	0.091	0.157
532	0.175	0.168	0.178	0.179	0.178	0.175	0.138	0.159	0.039	0.151	0.091	0.156
533	0.174	0.167	0.177	0.178	0.177	0.174	0.138	0.158	0.039	0.15	0.091	0.155
534	0.173	0.166	0.175	0.177	0.177	0.173	0.137	0.157	0.039	0.15	0.09	0.155
535	0.171	0.165	0.174	0.176	0.176	0.171	0.136	0.156	0.039	0.149	0.089	0.153
536	0.17	0.164	0.173	0.174	0.174	0.17	0.135	0.155	0.039	0.148	0.089	0.152
537	0.169	0.163	0.172	0.173	0.173	0.169	0.134	0.154	0.039	0.147	0.088	0.151
538	0.167	0.161	0.17	0.172	0.172	0.167	0.132	0.152	0.039	0.146	0.087	0.15
539	0.166	0.16	0.169	0.17	0.171	0.166	0.132	0.152	0.039	0.145	0.087	0.149
540	0.164	0.158	0.167	0.168	0.169	0.165	0.13	0.15	0.039	0.144	0.086	0.147
541	0.163	0.157	0.166	0.167	0.168	0.163	0.129	0.149	0.039	0.143	0.085	0.146
542	0.162	0.156	0.165	0.166	0.168	0.162	0.128	0.148	0.039	0.142	0.085	0.145
543	0.161	0.155	0.163	0.165	0.166	0.161	0.127	0.147	0.039	0.141	0.084	0.144
544	0.159	0.153	0.162	0.163	0.165	0.159	0.126	0.145	0.039	0.14	0.083	0.143
545	0.158	0.152	0.161	0.162	0.163	0.158	0.125	0.144	0.039	0.139	0.083	0.142
546	0.156	0.151	0.159	0.16	0.162	0.156	0.124	0.143	0.039	0.138	0.082	0.14
547	0.155	0.149	0.157	0.159	0.161	0.155	0.123	0.142	0.039	0.137	0.081	0.139
548	0.154	0.148	0.157	0.158	0.16	0.154	0.122	0.141	0.039	0.136	0.081	0.139
549	0.153	0.147	0.155	0.156	0.159	0.153	0.121	0.139	0.039	0.135	0.08	0.137
550	0.151	0.145	0.154	0.154	0.157	0.151	0.119	0.138	0.039	0.134	0.079	0.136
551	0.15	0.144	0.152	0.153	0.156	0.15	0.118	0.137	0.039	0.133	0.079	0.135
552	0.148	0.143	0.151	0.152	0.155	0.148	0.117	0.135	0.039	0.132	0.078	0.133
553	0.147	0.141	0.15	0.15	0.154	0.147	0.117	0.134	0.039	0.131	0.078	0.132
554	0.145	0.14	0.148	0.149	0.152	0.146	0.115	0.133	0.039	0.13	0.077	0.131
555	0.144	0.138	0.146	0.147	0.151	0.144	0.114	0.131	0.039	0.128	0.076	0.129
556	0.143	0.138	0.145	0.146	0.15	0.143	0.113	0.13	0.039	0.127	0.076	0.129
557	0.141	0.136	0.144	0.144	0.149	0.141	0.112	0.129	0.039	0.126	0.075	0.127
558	0.14	0.135	0.143	0.143	0.147	0.14	0.111	0.128	0.039	0.126	0.075	0.126
559	0.138	0.133	0.141	0.142	0.146	0.139	0.11	0.126	0.039	0.124	0.074	0.125
560	0.137	0.132	0.139	0.14	0.144	0.137	0.108	0.125	0.039	0.123	0.073	0.123
561	0.135	0.13	0.138	0.139	0.143	0.136	0.107	0.124	0.039	0.122	0.072	0.122
562	0.134	0.129	0.136	0.137	0.142	0.134	0.107	0.122	0.039	0.121	0.071	0.121
563	0.133	0.128	0.136	0.136	0.141	0.133	0.106	0.121	0.039	0.12	0.071	0.12
564	0.132	0.127	0.134	0.135	0.14	0.132	0.104	0.12	0.039	0.119	0.071	0.119
565	0.13	0.125	0.132	0.133	0.138	0.13	0.103	0.119	0.039	0.118	0.07	0.117
566	0.129	0.124	0.131	0.132	0.137	0.129	0.102	0.118	0.039	0.118	0.069	0.116
567	0.128	0.123	0.13	0.131	0.136	0.128	0.101	0.116	0.039	0.116	0.069	0.115
568	0.127	0.122	0.129	0.129	0.135	0.126	0.1	0.115	0.039	0.115	0.068	0.114
569	0.125	0.12	0.127	0.128	0.134	0.125	0.099	0.114	0.039	0.114	0.067	0.113
570	0.124	0.119	0.126	0.127	0.132	0.124	0.098	0.113	0.039	0.114	0.067	0.112
571	0.123	0.118	0.125	0.126	0.131	0.123	0.098	0.111	0.04	0.113	0.066	0.111
572	0.121	0.117	0.123	0.124	0.13	0.122	0.096	0.11	0.039	0.112	0.066	0.11
573	0.12	0.115	0.122	0.123	0.129	0.12	0.095	0.109	0.039	0.111	0.065	0.109
574	0.119	0.114	0.121	0.122	0.128	0.119	0.094	0.108	0.039	0.11	0.064	0.107
575	0.118	0.113	0.12	0.12	0.127	0.118	0.094	0.107	0.039	0.109	0.064	0.106
576	0.116	0.112	0.118	0.119	0.126	0.116	0.092	0.106	0.039	0.108	0.063	0.105
577	0.115	0.111	0.117	0.118	0.125	0.115	0.092	0.105	0.039	0.107	0.063	0.104
578	0.114	0.11	0.116	0.117	0.123	0.114	0.091	0.103	0.039	0.106	0.062	0.103
579	0.113	0.109	0.115	0.116	0.122	0.113	0.09	0.103	0.039	0.105	0.061	0.102
580	0.112	0.107	0.113	0.115	0.121	0.112	0.089	0.101	0.039	0.104	0.061	0.101
581	0.11	0.106	0.112	0.114	0.12	0.111	0.088	0.1	0.039	0.103	0.06	0.1
582	0.11	0.105	0.111	0.113	0.119	0.11	0.087	0.099	0.039	0.103	0.06	0.099
583	0.108	0.104	0.11	0.111	0.118	0.108	0.086	0.098	0.039	0.102	0.06	0.098
584	0.107	0.103	0.109	0.11	0.117	0.107	0.086	0.097	0.039	0.101	0.059	0.097
585	0.106	0.102	0.108	0.11	0.116	0.106	0.085	0.096	0.039	0.1	0.058	0.096
586	0.105	0.101	0.107	0.108	0.115	0.105	0.084	0.095	0.039	0.099	0.058	0.095
587	0.104	0.1	0.106	0.107	0.114	0.104	0.083	0.094	0.039	0.098	0.057	0.094
588	0.103	0.099	0.104	0.106	0.113	0.103	0.082	0.093	0.039	0.097	0.057	0.093
589	0.102	0.098	0.104	0.105	0.112	0.102	0.082	0.093	0.039	0.097	0.057	0.092
590	0.101	0.097	0.102	0.104	0.111	0.101	0.081	0.091	0.039	0.096	0.056	0.091
591	0.1	0.096	0.102	0.103	0.11	0.1	0.08	0.091	0.039	0.095	0.056	0.09
592	0.099	0.095	0.101	0.102	0.11	0.099	0.079	0.089	0.039	0.094	0.055	0.089
593	0.098	0.094	0.1	0.101	0.108	0.098	0.078	0.088	0.039	0.093	0.054	0.088
594	0.097	0.093	0.098	0.1	0.107	0.097	0.077	0.088	0.039	0.093	0.054	0.088
595	0.096	0.092	0.097	0.099	0.106	0.096	0.076	0.087	0.039	0.092	0.053	0.086
596	0.095	0.091	0.096	0.098	0.106	0.095	0.076	0.086	0.039	0.091	0.053	0.086
597	0.094	0.09	0.096	0.097	0.105	0.094	0.075	0.085	0.039	0.09	0.052	0.085
598	0.093	0.09	0.094	0.096	0.105	0.093	0.074	0.084	0.039	0.09	0.052	0.084
599	0.092	0.089	0.094	0.096	0.104	0.092	0.074	0.084	0.039	0.089	0.052	0.083
600	0.091	0.088	0.093	0.095	0.103	0.092	0.073	0.083	0.039	0.088	0.051	0.082
601	0.091	0.087	0.092	0.094	0.102	0.091	0.073	0.082	0.039	0.088	0.051	0.082
602	0.09	0.086	0.091	0.093	0.1	0.09	0.072	0.081	0.039	0.087	0.05	0.081
603	0.089	0.085	0.09	0.092	0.1	0.089	0.071	0.08	0.039	0.087	0.05	0.08
604	0.088	0.084	0.089	0.091	0.099	0.088	0.071	0.079	0.039	0.085	0.049	0.079
605	0.087	0.084	0.088	0.09	0.099	0.087	0.07	0.079	0.039	0.085	0.049	0.078
606	0.086	0.083	0.087	0.09	0.098	0.086	0.069	0.077	0.039	0.085	0.049	0.078
607	0.085	0.082	0.087	0.089	0.098	0.086	0.069	0.077	0.039	0.084	0.048	0.077
608	0.085	0.081	0.086	0.088	0.097	0.085	0.068	0.076	0.039	0.083	0.048	0.076
609	0.084	0.081	0.085	0.087	0.096	0.084	0.068	0.076	0.039	0.083	0.048	0.076
610	0.083	0.08	0.084	0.086	0.095	0.083	0.067	0.075	0.039	0.082	0.047	0.075
611	0.082	0.079	0.084	0.086	0.095	0.083	0.067	0.074	0.039	0.081	0.047	0.074
612	0.082	0.078	0.083	0.085	0.094	0.082	0.066	0.074	0.039	0.081	0.046	0.074
613	0.081	0.077	0.082	0.084	0.093	0.081	0.065	0.072	0.038	0.08	0.046	0.072
614	0.081	0.077	0.082	0.084	0.093	0.081	0.065	0.073	0.039	0.08	0.046	0.073
615	0.08	0.076	0.08	0.083	0.092	0.08	0.064	0.072	0.038	0.079	0.045	0.072
616	0.079	0.076	0.08	0.082	0.092	0.08	0.064	0.071	0.039	0.079	0.045	0.071
617	0.079	0.075	0.079	0.082	0.091	0.079	0.063	0.07	0.039	0.078	0.045	0.071
618	0.078	0.075	0.078	0.081	0.09	0.078	0.063	0.07	0.038	0.078	0.044	0.07
619	0.077	0.074	0.078	0.08	0.089	0.077	0.062	0.069	0.038	0.077	0.044	0.069
620	0.077	0.073	0.077	0.08	0.089	0.077	0.062	0.068	0.039	0.077	0.044	0.069
621	0.075	0.073	0.077	0.079	0.088	0.076	0.061	0.068	0.039	0.076	0.043	0.068
622	0.075	0.072	0.076	0.079	0.088	0.076	0.061	0.067	0.039	0.076	0.043	0.067
623	0.074	0.071	0.075	0.078	0.087	0.075	0.06	0.066	0.038	0.075	0.043	0.066
624	0.073	0.07	0.074	0.077	0.086	0.074	0.059	0.066	0.038	0.074	0.042	0.066
625	0.073	0.07	0.074	0.076	0.086	0.074	0.059	0.065	0.038	0.074	0.042	0.066
626	0.073	0.07	0.073	0.076	0.086	0.074	0.059	0.065	0.038	0.073	0.042	0.065
627	0.072	0.069	0.073	0.076	0.085	0.073	0.058	0.064	0.038	0.073	0.042	0.065
628	0.071	0.068	0.072	0.075	0.085	0.073	0.058	0.064	0.039	0.072	0.041	0.064
629	0.071	0.068	0.072	0.074	0.084	0.072	0.057	0.063	0.038	0.072	0.041	0.063
630	0.07	0.067	0.071	0.074	0.084	0.071	0.057	0.063	0.038	0.072	0.041	0.063
631	0.069	0.067	0.07	0.073	0.083	0.071	0.056	0.062	0.038	0.071	0.04	0.062
632	0.069	0.066	0.07	0.072	0.083	0.07	0.056	0.062	0.038	0.071	0.04	0.062
633	0.068	0.066	0.069	0.073	0.082	0.07	0.056	0.061	0.038	0.07	0.04	0.061
634	0.068	0.065	0.069	0.072	0.082	0.07	0.055	0.061	0.038	0.069	0.04	0.061
635	0.067	0.065	0.068	0.071	0.081	0.069	0.055	0.06	0.038	0.069	0.039	0.061
636	0.067	0.064	0.067	0.071	0.081	0.069	0.054	0.06	0.038	0.069	0.039	0.06
637	0.066	0.064	0.067	0.07	0.08	0.068	0.054	0.059	0.038	0.068	0.039	0.059
638	0.066	0.063	0.067	0.069	0.08	0.068	0.054	0.059	0.038	0.068	0.038	0.059
639	0.065	0.063	0.066	0.07	0.08	0.068	0.053	0.058	0.038	0.067	0.038	0.059
640	0.065	0.062	0.066	0.069	0.079	0.067	0.053	0.058	0.038	0.067	0.038	0.058
641	0.064	0.062	0.065	0.068	0.079	0.067	0.052	0.058	0.038	0.067	0.037	0.058
642	0.064	0.062	0.065	0.068	0.079	0.066	0.052	0.057	0.038	0.066	0.037	0.057
643	0.063	0.061	0.064	0.067	0.078	0.066	0.051	0.057	0.038	0.066	0.037	0.057
644	0.063	0.061	0.064	0.067	0.078	0.066	0.051	0.057	0.038	0.066	0.037	0.056
645	0.063	0.06	0.064	0.067	0.078	0.065	0.051	0.056	0.038	0.065	0.037	0.056
646	0.062	0.06	0.063	0.066	0.077	0.065	0.051	0.056	0.038	0.065	0.037	0.056
647	0.062	0.06	0.063	0.066	0.077	0.065	0.051	0.056	0.038	0.065	0.036	0.056
648	0.061	0.059	0.062	0.065	0.077	0.064	0.05	0.055	0.038	0.064	0.036	0.055
649	0.061	0.059	0.062	0.065	0.076	0.064	0.05	0.055	0.038	0.064	0.036	0.055
650	0.06	0.058	0.061	0.065	0.076	0.064	0.049	0.054	0.037	0.063	0.035	0.054
651	0.06	0.058	0.061	0.064	0.076	0.063	0.049	0.054	0.038	0.063	0.035	0.054
652	0.059	0.058	0.06	0.064	0.075	0.063	0.049	0.054	0.038	0.063	0.035	0.053
653	0.059	0.057	0.06	0.063	0.075	0.063	0.049	0.053	0.038	0.062	0.035	0.053
654	0.059	0.057	0.06	0.063	0.075	0.063	0.048	0.053	0.038	0.062	0.035	0.053
655	0.059	0.057	0.059	0.063	0.075	0.062	0.048	0.053	0.038	0.061	0.035	0.053
656	0.059	0.057	0.059	0.063	0.075	0.062	0.048	0.053	0.038	0.061	0.034	0.052
657	0.058	0.056	0.059	0.062	0.074	0.062	0.047	0.052	0.037	0.061	0.034	0.052
658	0.057	0.056	0.058	0.061	0.073	0.061	0.047	0.052	0.037	0.06	0.034	0.052
659	0.057	0.055	0.058	0.061	0.073	0.061	0.047	0.051	0.037	0.06	0.034	0.051
660	0.057	0.055	0.058	0.061	0.074	0.061	0.047	0.051	0.038	0.06	0.033	0.051
661	0.057	0.055	0.057	0.061	0.073	0.061	0.046	0.051	0.038	0.06	0.034	0.051
662	0.056	0.054	0.057	0.06	0.073	0.06	0.046	0.05	0.037	0.06	0.033	0.05
663	0.056	0.054	0.056	0.06	0.072	0.06	0.045	0.05	0.037	0.059	0.033	0.05
664	0.055	0.054	0.056	0.059	0.072	0.06	0.045	0.049	0.037	0.059	0.033	0.05
665	0.055	0.053	0.056	0.059	0.072	0.059	0.045	0.049	0.037	0.059	0.032	0.049
666	0.055	0.053	0.056	0.059	0.072	0.059	0.045	0.049	0.037	0.058	0.032	0.049
667	0.055	0.053	0.056	0.059	0.072	0.059	0.045	0.049	0.038	0.058	0.033	0.049
668	0.054	0.052	0.055	0.058	0.071	0.059	0.044	0.049	0.037	0.057	0.032	0.049
669	0.054	0.052	0.055	0.058	0.071	0.058	0.044	0.048	0.037	0.057	0.032	0.048
670	0.054	0.052	0.054	0.057	0.071	0.058	0.044	0.048	0.037	0.057	0.032	0.048
671	0.053	0.051	0.054	0.057	0.07	0.058	0.044	0.047	0.037	0.057	0.031	0.048
672	0.053	0.051	0.053	0.056	0.07	0.058	0.043	0.047	0.037	0.056	0.031	0.047
673	0.053	0.051	0.053	0.056	0.07	0.058	0.043	0.047	0.037	0.056	0.031	0.047
674	0.052	0.051	0.053	0.056	0.07	0.057	0.043	0.047	0.037	0.056	0.031	0.047
675	0.052	0.051	0.053	0.056	0.069	0.057	0.042	0.047	0.037	0.055	0.031	0.046
676	0.052	0.05	0.052	0.055	0.069	0.057	0.042	0.046	0.037	0.055	0.031	0.046
677	0.051	0.05	0.052	0.055	0.069	0.057	0.042	0.046	0.037	0.055	0.03	0.046
678	0.051	0.05	0.052	0.054	0.068	0.056	0.041	0.046	0.037	0.054	0.03	0.046
679	0.051	0.049	0.051	0.054	0.068	0.056	0.042	0.045	0.037	0.054	0.03	0.045
680	0.05	0.049	0.051	0.054	0.068	0.056	0.041	0.045	0.037	0.054	0.03	0.045
681	0.05	0.049	0.051	0.054	0.068	0.056	0.041	0.045	0.037	0.054	0.029	0.045
682	0.05	0.049	0.051	0.054	0.068	0.056	0.041	0.045	0.037	0.054	0.029	0.045
683	0.05	0.048	0.051	0.053	0.068	0.056	0.04	0.045	0.037	0.053	0.029	0.044
684	0.049	0.048	0.05	0.053	0.068	0.055	0.041	0.044	0.037	0.053	0.029	0.044
685	0.049	0.048	0.05	0.053	0.067	0.055	0.04	0.044	0.037	0.053	0.029	0.044
686	0.049	0.048	0.05	0.052	0.067	0.055	0.04	0.044	0.037	0.053	0.029	0.044
687	0.049	0.047	0.049	0.052	0.067	0.055	0.04	0.044	0.037	0.052	0.029	0.043
688	0.048	0.047	0.049	0.052	0.067	0.054	0.039	0.044	0.037	0.052	0.028	0.044
689	0.048	0.047	0.049	0.051	0.067	0.054	0.039	0.043	0.037	0.052	0.028	0.044
690	0.048	0.047	0.049	0.051	0.066	0.054	0.039	0.043	0.037	0.051	0.028	0.043
691	0.048	0.047	0.049	0.051	0.066	0.054	0.039	0.043	0.037	0.051	0.028	0.043
692	0.047	0.047	0.049	0.051	0.066	0.054	0.039	0.043	0.037	0.051	0.028	0.043
693	0.048	0.046	0.048	0.051	0.066	0.054	0.039	0.043	0.037	0.051	0.028	0.043
694	0.047	0.046	0.048	0.05	0.065	0.053	0.038	0.042	0.037	0.05	0.028	0.042
695	0.047	0.046	0.048	0.05	0.065	0.054	0.038	0.042	0.037	0.051	0.028	0.042
696	0.047	0.046	0.047	0.05	0.065	0.053	0.038	0.042	0.037	0.05	0.027	0.042
697	0.046	0.045	0.047	0.049	0.064	0.053	0.038	0.042	0.037	0.05	0.027	0.042
698	0.046	0.045	0.047	0.049	0.064	0.053	0.038	0.042	0.037	0.05	0.027	0.042
699	0.046	0.045	0.047	0.049	0.064	0.053	0.037	0.041	0.037	0.05	0.027	0.041
700	0.046	0.045	0.047	0.049	0.065	0.053	0.037	0.041	0.037	0.049	0.027	0.041
701	0.046	0.045	0.046	0.049	0.065	0.053	0.037	0.041	0.037	0.049	0.027	0.041
702	0.046	0.045	0.046	0.048	0.064	0.052	0.037	0.041	0.037	0.049	0.027	0.041
703	0.045	0.044	0.045	0.048	0.064	0.052	0.037	0.04	0.037	0.048	0.026	0.041
704	0.045	0.044	0.046	0.048	0.064	0.052	0.037	0.041	0.037	0.048	0.026	0.041
705	0.045	0.045	0.046	0.048	0.063	0.052	0.038	0.041	0.037	0.048	0.027	0.041
706	0.045	0.044	0.046	0.048	0.064	0.053	0.037	0.041	0.037	0.048	0.028	0.041
707	0.044	0.044	0.045	0.047	0.062	0.052	0.036	0.04	0.036	0.047	0.027	0.041
708	0.042	0.042	0.043	0.045	0.061	0.051	0.035	0.038	0.036	0.045	0.025	0.039
709	0.045	0.044	0.045	0.047	0.064	0.052	0.037	0.04	0.036	0.048	0.027	0.041
710	0.044	0.043	0.045	0.047	0.063	0.051	0.036	0.04	0.037	0.048	0.026	0.04
711	0.042	0.042	0.044	0.045	0.061	0.051	0.035	0.038	0.036	0.046	0.025	0.039
712	0.043	0.043	0.045	0.046	0.062	0.051	0.035	0.039	0.037	0.047	0.027	0.04
713	0.043	0.044	0.045	0.046	0.062	0.051	0.035	0.04	0.037	0.047	0.026	0.04
714	0.043	0.043	0.044	0.046	0.061	0.052	0.035	0.04	0.036	0.047	0.026	0.04
715	0.043	0.043	0.044	0.046	0.061	0.051	0.034	0.039	0.036	0.046	0.025	0.04
716	0.043	0.042	0.044	0.046	0.062	0.052	0.035	0.039	0.037	0.046	0.026	0.039
717	0.043	0.043	0.044	0.046	0.062	0.051	0.034	0.038	0.037	0.047	0.025	0.039
718	0.043	0.042	0.044	0.045	0.062	0.051	0.035	0.039	0.036	0.046	0.025	0.039
719	0.042	0.042	0.043	0.045	0.061	0.051	0.034	0.038	0.036	0.046	0.025	0.039
720	0.042	0.042	0.042	0.045	0.061	0.05	0.034	0.038	0.036	0.045	0.024	0.038
721	0.042	0.042	0.043	0.045	0.061	0.05	0.034	0.038	0.037	0.046	0.025	0.039
722	0.042	0.042	0.043	0.045	0.06	0.05	0.034	0.038	0.036	0.045	0.024	0.038
723	0.042	0.041	0.042	0.044	0.06	0.05	0.033	0.037	0.036	0.045	0.024	0.038
724	0.042	0.041	0.043	0.044	0.06	0.05	0.033	0.038	0.036	0.045	0.024	0.038
725	0.041	0.041	0.042	0.044	0.06	0.049	0.033	0.037	0.036	0.045	0.024	0.038
726	0.041	0.041	0.042	0.043	0.059	0.049	0.033	0.037	0.036	0.044	0.023	0.038
727	0.041	0.041	0.042	0.043	0.06	0.049	0.033	0.037	0.036	0.044	0.023	0.038
728	0.041	0.041	0.042	0.043	0.059	0.049	0.033	0.037	0.036	0.044	0.024	0.038
729	0.041	0.041	0.041	0.043	0.059	0.049	0.032	0.036	0.036	0.044	0.023	0.038
730	0.041	0.04	0.041	0.043	0.059	0.049	0.033	0.037	0.036	0.044	0.023	0.038
731	0.041	0.04	0.041	0.042	0.059	0.048	0.032	0.036	0.036	0.044	0.023	0.037
732	0.04	0.04	0.041	0.042	0.058	0.048	0.032	0.036	0.036	0.043	0.023	0.038
733	0.04	0.04	0.04	0.042	0.058	0.048	0.031	0.035	0.035	0.043	0.022	0.037
734	0.04	0.04	0.041	0.042	0.058	0.048	0.032	0.036	0.036	0.044	0.023	0.037
735	0.04	0.039	0.04	0.041	0.058	0.048	0.031	0.035	0.035	0.043	0.022	0.037
736	0.039	0.04	0.041	0.041	0.057	0.048	0.031	0.035	0.036	0.043	0.022	0.037
737	0.04	0.04	0.04	0.041	0.058	0.048	0.031	0.035	0.036	0.043	0.022	0.037
738	0.04	0.039	0.04	0.041	0.057	0.047	0.031	0.035	0.035	0.042	0.022	0.037
739	0.039	0.039	0.04	0.041	0.057	0.047	0.031	0.035	0.035	0.042	0.022	0.037
740	0.039	0.039	0.04	0.041	0.057	0.047	0.031	0.035	0.036	0.042	0.022	0.037
741	0.039	0.039	0.04	0.041	0.057	0.047	0.031	0.035	0.035	0.042	0.022	0.036
742	0.039	0.039	0.039	0.04	0.057	0.046	0.03	0.034	0.035	0.042	0.021	0.036
743	0.039	0.039	0.039	0.04	0.057	0.046	0.03	0.035	0.035	0.042	0.022	0.036
744	0.039	0.039	0.039	0.04	0.057	0.046	0.03	0.034	0.035	0.042	0.021	0.036
745	0.039	0.039	0.039	0.04	0.056	0.046	0.03	0.034	0.035	0.042	0.021	0.036
746	0.039	0.039	0.039	0.04	0.056	0.046	0.03	0.034	0.035	0.042	0.021	0.036
747	0.038	0.038	0.038	0.039	0.056	0.046	0.03	0.033	0.035	0.041	0.021	0.036
748	0.038	0.038	0.039	0.039	0.056	0.046	0.03	0.034	0.035	0.041	0.021	0.036
749	0.038	0.038	0.039	0.039	0.056	0.046	0.03	0.034	0.035	0.041	0.021	0.036
750	0.038	0.038	0.038	0.039	0.056	0.045	0.03	0.034	0.035	0.041	0.021	0.036
751	0.038	0.038	0.038	0.039	0.056	0.046	0.03	0.033	0.035	0.041	0.021	0.036
752	0.038	0.038	0.038	0.039	0.055	0.045	0.029	0.033	0.035	0.041	0.021	0.035
753	0.038	0.038	0.038	0.039	0.055	0.045	0.029	0.033	0.035	0.041	0.021	0.035
754	0.038	0.038	0.038	0.039	0.055	0.045	0.029	0.033	0.035	0.041	0.021	0.036
755	0.038	0.038	0.038	0.039	0.055	0.045	0.029	0.033	0.035	0.041	0.021	0.035
756	0.037	0.038	0.038	0.038	0.055	0.044	0.029	0.033	0.036	0.04	0.021	0.035
757	0.038	0.038	0.038	0.038	0.055	0.044	0.029	0.033	0.036	0.04	0.021	0.035
758	0.037	0.037	0.038	0.038	0.055	0.044	0.029	0.033	0.035	0.04	0.021	0.035
759	0.037	0.037	0.037	0.038	0.054	0.044	0.029	0.032	0.035	0.04	0.021	0.035
760	0.037	0.037	0.038	0.038	0.054	0.044	0.029	0.033	0.035	0.04	0.021	0.036
761	0.037	0.037	0.037	0.038	0.054	0.044	0.028	0.032	0.035	0.04	0.021	0.035
762	0.037	0.037	0.037	0.038	0.054	0.044	0.028	0.032	0.036	0.04	0.021	0.035
763	0.037	0.037	0.037	0.038	0.053	0.043	0.029	0.032	0.035	0.04	0.021	0.035
764	0.037	0.037	0.037	0.037	0.053	0.043	0.028	0.032	0.036	0.04	0.021	0.035
765	0.036	0.037	0.037	0.037	0.054	0.043	0.028	0.032	0.036	0.04	0.021	0.035
766	0.036	0.036	0.037	0.037	0.053	0.043	0.028	0.032	0.035	0.039	0.02	0.034
767	0.036	0.037	0.036	0.037	0.053	0.043	0.028	0.032	0.035	0.039	0.02	0.035
768	0.036	0.037	0.036	0.037	0.053	0.042	0.028	0.031	0.035	0.039	0.02	0.035
769	0.036	0.037	0.037	0.037	0.053	0.042	0.028	0.032	0.036	0.039	0.021	0.035
770	0.036	0.036	0.036	0.037	0.053	0.042	0.028	0.031	0.036	0.039	0.021	0.034
771	0.036	0.036	0.036	0.036	0.053	0.042	0.027	0.031	0.035	0.039	0.02	0.034
772	0.036	0.036	0.036	0.036	0.052	0.042	0.028	0.031	0.035	0.039	0.02	0.034
773	0.036	0.036	0.036	0.036	0.052	0.042	0.027	0.031	0.035	0.039	0.021	0.034
774	0.036	0.036	0.036	0.036	0.052	0.042	0.028	0.031	0.036	0.039	0.02	0.034
775	0.036	0.036	0.036	0.036	0.052	0.041	0.027	0.03	0.036	0.039	0.02	0.035
776	0.035	0.036	0.035	0.035	0.051	0.041	0.027	0.031	0.035	0.039	0.02	0.034
777	0.036	0.036	0.035	0.036	0.052	0.042	0.027	0.031	0.036	0.039	0.021	0.034
778	0.035	0.036	0.035	0.036	0.051	0.041	0.027	0.031	0.035	0.038	0.021	0.034
779	0.035	0.036	0.035	0.035	0.051	0.041	0.027	0.031	0.036	0.038	0.02	0.034
780	0.035	0.036	0.035	0.035	0.051	0.041	0.027	0.03	0.035	0.038	0.02	0.034
781	0.035	0.036	0.036	0.035	0.051	0.041	0.027	0.031	0.036	0.038	0.021	0.034
782	0.035	0.036	0.036	0.035	0.051	0.041	0.027	0.03	0.036	0.038	0.021	0.034
783	0.035	0.035	0.035	0.035	0.051	0.04	0.027	0.03	0.035	0.038	0.02	0.034
784	0.035	0.036	0.035	0.035	0.051	0.04	0.027	0.03	0.036	0.038	0.02	0.034
785	0.035	0.035	0.035	0.035	0.051	0.04	0.027	0.03	0.036	0.038	0.02	0.034
786	0.035	0.035	0.035	0.035	0.05	0.04	0.027	0.03	0.036	0.038	0.02	0.034
787	0.035	0.035	0.035	0.035	0.05	0.04	0.027	0.03	0.036	0.038	0.02	0.034
788	0.035	0.035	0.034	0.035	0.05	0.039	0.027	0.03	0.036	0.038	0.02	0.034
789	0.035	0.035	0.035	0.035	0.051	0.04	0.027	0.03	0.036	0.038	0.02	0.033
790	0.035	0.035	0.034	0.035	0.05	0.039	0.026	0.029	0.036	0.037	0.02	0.034
791	0.035	0.035	0.035	0.034	0.05	0.039	0.026	0.029	0.036	0.038	0.02	0.034
792	0.034	0.035	0.034	0.034	0.05	0.039	0.026	0.03	0.036	0.038	0.02	0.033
793	0.034	0.035	0.034	0.034	0.05	0.039	0.026	0.029	0.035	0.037	0.02	0.033
794	0.035	0.035	0.034	0.035	0.05	0.039	0.026	0.03	0.036	0.038	0.02	0.034
795	0.035	0.035	0.034	0.034	0.05	0.039	0.026	0.03	0.036	0.037	0.021	0.033
796	0.034	0.035	0.034	0.035	0.05	0.039	0.026	0.029	0.036	0.038	0.02	0.033
797	0.034	0.035	0.034	0.034	0.049	0.039	0.026	0.029	0.036	0.037	0.02	0.033
798	0.034	0.035	0.034	0.034	0.049	0.038	0.026	0.029	0.036	0.037	0.02	0.033
799	0.034	0.035	0.033	0.034	0.048	0.038	0.026	0.029	0.036	0.037	0.02	0.033
800	0.034	0.035	0.034	0.034	0.049	0.038	0.026	0.029	0.036	0.037	0.02	0.033
801	0.034	0.035	0.033	0.034	0.049	0.038	0.025	0.029	0.036	0.037	0.02	0.033
802	0.034	0.035	0.033	0.034	0.048	0.038	0.026	0.029	0.036	0.037	0.02	0.033
803	0.034	0.035	0.033	0.034	0.049	0.038	0.026	0.029	0.037	0.037	0.021	0.033
804	0.033	0.034	0.033	0.034	0.048	0.037	0.025	0.028	0.036	0.037	0.02	0.033
805	0.034	0.034	0.033	0.034	0.048	0.037	0.025	0.028	0.036	0.037	0.02	0.032
806	0.034	0.034	0.033	0.033	0.048	0.037	0.026	0.028	0.036	0.037	0.02	0.033
807	0.033	0.034	0.033	0.033	0.048	0.036	0.025	0.028	0.036	0.037	0.02	0.032
808	0.033	0.034	0.033	0.033	0.048	0.037	0.025	0.028	0.036	0.037	0.021	0.033
809	0.033	0.034	0.033	0.033	0.048	0.036	0.025	0.028	0.036	0.037	0.02	0.032
810	0.033	0.034	0.033	0.033	0.047	0.037	0.025	0.028	0.036	0.037	0.02	0.033
811	0.033	0.034	0.032	0.033	0.047	0.036	0.025	0.028	0.036	0.036	0.02	0.033
812	0.033	0.034	0.033	0.033	0.047	0.036	0.025	0.027	0.036	0.036	0.02	0.032
813	0.033	0.034	0.033	0.033	0.047	0.036	0.025	0.028	0.036	0.036	0.02	0.032
814	0.033	0.034	0.033	0.033	0.047	0.037	0.025	0.028	0.036	0.037	0.02	0.032
815	0.033	0.034	0.032	0.033	0.047	0.036	0.025	0.028	0.036	0.037	0.02	0.032
816	0.033	0.034	0.032	0.033	0.047	0.036	0.025	0.028	0.036	0.036	0.02	0.033
817	0.033	0.034	0.032	0.033	0.046	0.036	0.025	0.027	0.036	0.036	0.02	0.032
818	0.033	0.034	0.032	0.033	0.046	0.036	0.025	0.027	0.036	0.036	0.02	0.032
819	0.033	0.034	0.032	0.033	0.046	0.036	0.025	0.028	0.036	0.036	0.02	0.032
820	0.033	0.034	0.032	0.033	0.046	0.035	0.024	0.027	0.036	0.036	0.02	0.033
821	0.032	0.033	0.032	0.033	0.045	0.035	0.024	0.027	0.036	0.036	0.02	0.032
822	0.033	0.034	0.032	0.032	0.045	0.035	0.024	0.027	0.036	0.036	0.02	0.032
823	0.032	0.033	0.032	0.032	0.046	0.035	0.024	0.027	0.036	0.036	0.02	0.032
824	0.032	0.033	0.032	0.032	0.046	0.035	0.024	0.027	0.036	0.036	0.02	0.032
825	0.032	0.033	0.031	0.032	0.046	0.034	0.024	0.027	0.036	0.036	0.019	0.032
826	0.032	0.033	0.031	0.032	0.045	0.034	0.024	0.027	0.036	0.035	0.019	0.032
827	0.032	0.033	0.031	0.032	0.045	0.034	0.024	0.026	0.036	0.035	0.019	0.032
828	0.032	0.033	0.031	0.032	0.045	0.034	0.023	0.026	0.035	0.036	0.019	0.031
829	0.032	0.033	0.031	0.032	0.045	0.034	0.023	0.026	0.035	0.035	0.019	0.031
830	0.032	0.033	0.031	0.031	0.045	0.034	0.023	0.026	0.035	0.035	0.019	0.031
831	0.032	0.033	0.031	0.032	0.044	0.034	0.023	0.026	0.035	0.035	0.019	0.032
832	0.031	0.033	0.031	0.032	0.044	0.033	0.023	0.026	0.035	0.035	0.019	0.031
833	0.031	0.032	0.031	0.031	0.043	0.033	0.023	0.026	0.035	0.035	0.019	0.031
834	0.031	0.032	0.03	0.031	0.044	0.033	0.023	0.025	0.035	0.035	0.019	0.031
835	0.031	0.032	0.03	0.031	0.044	0.033	0.023	0.025	0.035	0.035	0.019	0.031
836	0.031	0.032	0.03	0.031	0.044	0.032	0.022	0.025	0.035	0.035	0.018	0.031
837	0.031	0.032	0.03	0.031	0.044	0.032	0.023	0.025	0.035	0.035	0.019	0.031
838	0.031	0.032	0.03	0.03	0.043	0.032	0.022	0.025	0.035	0.034	0.018	0.031
839	0.031	0.032	0.03	0.031	0.043	0.032	0.023	0.025	0.035	0.035	0.019	0.031
840	0.031	0.032	0.03	0.031	0.043	0.032	0.022	0.025	0.035	0.034	0.018	0.031
841	0.031	0.032	0.03	0.031	0.043	0.032	0.023	0.025	0.035	0.035	0.019	0.03
842	0.03	0.032	0.029	0.031	0.043	0.032	0.022	0.025	0.035	0.035	0.018	0.03
843	0.031	0.032	0.029	0.03	0.043	0.032	0.022	0.025	0.035	0.034	0.018	0.03
844	0.03	0.032	0.029	0.031	0.043	0.031	0.022	0.025	0.035	0.034	0.018	0.03
845	0.03	0.031	0.029	0.03	0.042	0.031	0.021	0.024	0.035	0.034	0.018	0.03
846	0.03	0.031	0.029	0.03	0.043	0.031	0.022	0.024	0.035	0.034	0.018	0.03
847	0.03	0.031	0.029	0.03	0.043	0.031	0.022	0.024	0.035	0.034	0.018	0.03
848	0.03	0.031	0.029	0.03	0.042	0.031	0.022	0.024	0.035	0.034	0.018	0.03
849	0.03	0.032	0.029	0.03	0.042	0.031	0.022	0.024	0.035	0.034	0.018	0.03
850	0.03	0.031	0.029	0.03	0.042	0.031	0.022	0.023	0.034	0.034	0.018	0.03
851	0.03	0.032	0.029	0.03	0.042	0.031	0.022	0.024	0.035	0.034	0.018	0.03
852	0.03	0.031	0.029	0.03	0.042	0.03	0.022	0.024	0.035	0.034	0.018	0.03
853	0.03	0.031	0.028	0.03	0.042	0.03	0.021	0.023	0.034	0.034	0.018	0.029
854	0.029	0.031	0.028	0.03	0.041	0.03	0.021	0.023	0.034	0.034	0.018	0.029
855	0.03	0.031	0.029	0.03	0.041	0.03	0.021	0.023	0.035	0.034	0.018	0.03
856	0.029	0.031	0.029	0.03	0.041	0.03	0.022	0.024	0.034	0.034	0.018	0.029
857	0.03	0.03	0.028	0.03	0.041	0.03	0.021	0.023	0.034	0.034	0.018	0.029
858	0.029	0.031	0.028	0.029	0.041	0.03	0.021	0.024	0.034	0.034	0.018	0.029
859	0.029	0.03	0.028	0.029	0.041	0.03	0.021	0.023	0.035	0.033	0.018	0.029
860	0.029	0.031	0.028	0.029	0.041	0.029	0.021	0.023	0.034	0.033	0.017	0.029
861	0.029	0.03	0.028	0.03	0.041	0.03	0.021	0.023	0.034	0.033	0.018	0.029
862	0.029	0.03	0.028	0.029	0.04	0.029	0.021	0.023	0.034	0.033	0.017	0.029
863	0.029	0.03	0.028	0.03	0.04	0.029	0.021	0.022	0.034	0.033	0.018	0.029
864	0.029	0.03	0.028	0.029	0.04	0.029	0.02	0.022	0.034	0.033	0.018	0.029
865	0.029	0.03	0.027	0.029	0.04	0.029	0.02	0.022	0.034	0.033	0.017	0.029
866	0.028	0.03	0.027	0.029	0.04	0.028	0.02	0.023	0.034	0.033	0.018	0.029
867	0.028	0.03	0.027	0.029	0.039	0.028	0.02	0.022	0.034	0.033	0.017	0.029
868	0.028	0.03	0.027	0.029	0.039	0.028	0.02	0.022	0.034	0.032	0.018	0.028
869	0.028	0.03	0.027	0.029	0.04	0.028	0.021	0.023	0.034	0.033	0.018	0.028
870	0.029	0.03	0.027	0.029	0.04	0.028	0.02	0.022	0.034	0.033	0.018	0.029
871	0.028	0.029	0.027	0.029	0.039	0.028	0.02	0.022	0.034	0.033	0.017	0.028
872	0.028	0.029	0.027	0.028	0.039	0.028	0.02	0.021	0.034	0.032	0.017	0.028
873	0.028	0.03	0.027	0.029	0.039	0.028	0.02	0.022	0.034	0.033	0.017	0.028
874	0.028	0.029	0.026	0.028	0.039	0.027	0.02	0.022	0.034	0.032	0.017	0.028
875	0.028	0.029	0.026	0.028	0.039	0.027	0.02	0.022	0.033	0.032	0.017	0.028
876	0.028	0.03	0.026	0.029	0.039	0.027	0.02	0.021	0.034	0.032	0.017	0.028
877	0.028	0.029	0.026	0.028	0.039	0.028	0.019	0.021	0.033	0.032	0.017	0.028
878	0.028	0.029	0.026	0.028	0.038	0.027	0.019	0.021	0.034	0.032	0.017	0.028
879	0.027	0.029	0.026	0.028	0.037	0.027	0.019	0.021	0.033	0.031	0.017	0.027
880	0.027	0.029	0.026	0.028	0.037	0.027	0.019	0.021	0.033	0.031	0.017	0.027
881	0.027	0.029	0.026	0.028	0.037	0.027	0.019	0.021	0.034	0.032	0.017	0.027
882	0.027	0.029	0.026	0.028	0.038	0.026	0.019	0.02	0.033	0.032	0.017	0.027
883	0.027	0.029	0.025	0.028	0.038	0.026	0.019	0.02	0.033	0.032	0.016	0.027
884	0.027	0.029	0.025	0.028	0.038	0.026	0.019	0.02	0.033	0.032	0.016	0.027
885	0.027	0.029	0.025	0.028	0.037	0.026	0.019	0.02	0.033	0.032	0.016	0.027
886	0.027	0.028	0.025	0.027	0.037	0.026	0.019	0.02	0.033	0.031	0.016	0.027
887	0.027	0.028	0.025	0.028	0.037	0.026	0.019	0.02	0.033	0.031	0.016	0.027
888	0.027	0.028	0.025	0.027	0.037	0.026	0.018	0.02	0.033	0.031	0.016	0.027
889	0.027	0.028	0.025	0.027	0.037	0.026	0.019	0.02	0.033	0.031	0.016	0.027
890	0.026	0.028	0.025	0.028	0.036	0.026	0.018	0.02	0.033	0.031	0.016	0.026
891	0.026	0.028	0.024	0.027	0.036	0.025	0.018	0.02	0.033	0.031	0.016	0.027
892	0.026	0.028	0.025	0.027	0.036	0.025	0.018	0.02	0.033	0.031	0.016	0.027
893	0.026	0.028	0.025	0.027	0.036	0.025	0.018	0.02	0.032	0.031	0.016	0.026
894	0.026	0.027	0.024	0.027	0.035	0.025	0.018	0.02	0.032	0.031	0.016	0.026
895	0.026	0.028	0.025	0.027	0.036	0.025	0.018	0.019	0.033	0.031	0.016	0.026
896	0.026	0.027	0.024	0.027	0.036	0.025	0.018	0.019	0.033	0.031	0.015	0.026
897	0.026	0.027	0.024	0.027	0.036	0.024	0.017	0.019	0.032	0.031	0.015	0.026
898	0.026	0.027	0.024	0.027	0.036	0.025	0.018	0.019	0.033	0.031	0.015	0.026
899	0.025	0.027	0.024	0.027	0.035	0.024	0.017	0.019	0.032	0.03	0.015	0.026
900	0.026	0.027	0.024	0.027	0.035	0.024	0.018	0.019	0.033	0.031	0.015	0.025
