# Supplementary material for: Lyophilizing SERS biosensors to enable translation into an easy-to-use assay
Source: Royal Society of Chemistry journal article supplement (doi:10.1039/d4ay01667j), 2024-01-01
Supplement: d4ay01667j1.zip [file d4ay01667j1.zip]

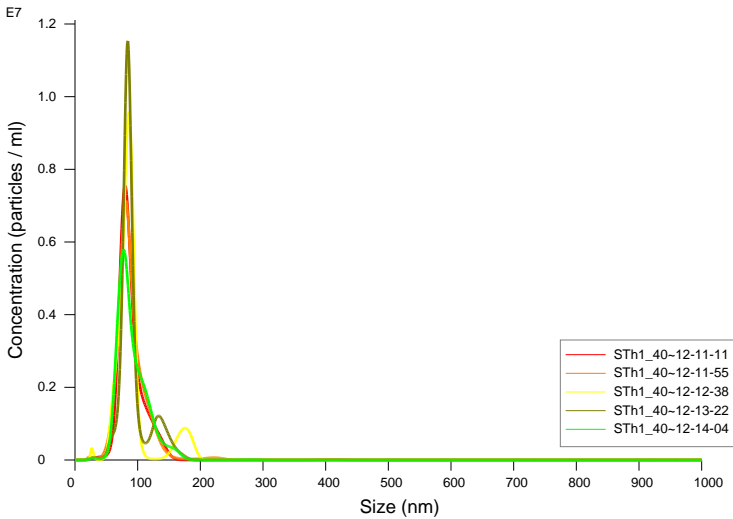

FTLA Concentration / Size graph for Experiment:  
STh1\_40x RT0 2023-05-18 12-10-48

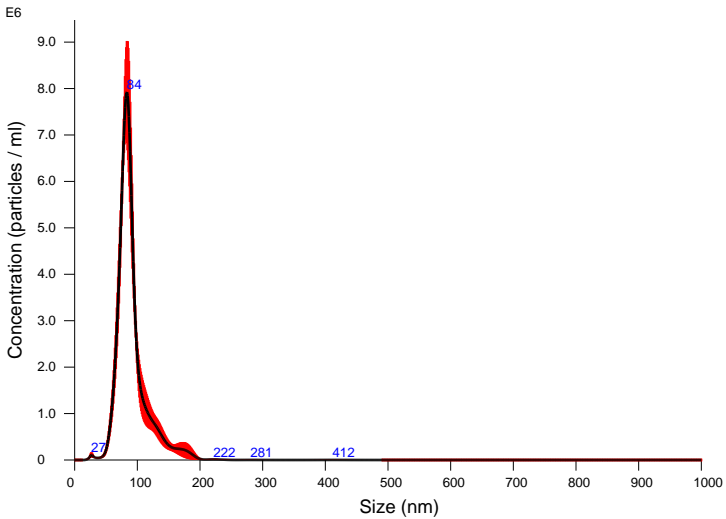

Averaged FTLA Concentration / Size for Experiment:  
STh1\_40x RT0 2023-05-18 12-10-48  
Error bars indicate + / - 1 standard error of the mean

## Included Files

STh1\_40x RT0 2023-05-18 12-11-11  
STh1\_40x RT0 2023-05-18 12-11-55  
STh1\_40x RT0 2023-05-18 12-12-38  
STh1\_40x RT0 2023-05-18 12-13-22  
STh1\_40x RT0 2023-05-18 12-14-04

## Details

NTA Version: NTA 3.4 Build 3.4.4  
Script Used: SOP Standard Measurement 12-10-48PM 18May2023.txt  
Time Captured: 12:10:48 18/05/2023  
Operator: LN  
Pre-treatment:  
Sample Name: STh1\_40x RT0  
Diluent:  
Remarks:

## Capture Settings

Camera Type: sCMOS  
Laser Type: Green  
Camera Level: 6  
Slider Shutter: 64  
Slider Gain: 5  
FPS: 25.0  
Number of Frames: 749  
Temperature: 23.7 °C  
Viscosity: (Water) 0.9 cP  
Dilution factor: Dilution not recorded

## Analysis Settings

Detect Threshold: 5  
Blur Size: Auto  
Max Jump Distance: Auto: 19.1 - 20.5 pix

## Results

### Stats: Merged Data

Mean: 90.9 nm  
Mode: 83.2 nm  
SD: 25.5 nm  
D10: 68.3 nm  
D50: 85.1 nm  
D90: 123.3 nm

### Stats: Mean +/- Standard Error

Mean: 90.8 +/- 0.6 nm  
Mode: 81.8 +/- 1.5 nm  
SD: 25.3 +/- 1.5 nm  
D10: 68.6 +/- 1.3 nm  
D50: 85.1 +/- 0.2 nm  
D90: 129.3 +/- 6.8 nm  
Concentration (Upgrade): 2.54e+08 +/- 6.02e+06 particles/ml  
41.8 +/- 1.0 particles/frame  
121.1 +/- 7.6 centres/frame

Concentration measurements may be unreliable  
See summary file for more info

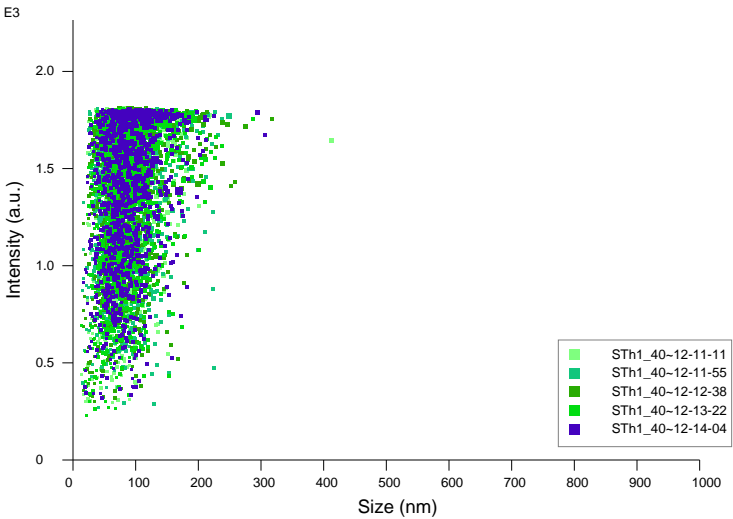

Intensity / Size graph for Experiment:  
STh1\_40x RT0 2023-05-18 12-10-48
