# Supplementary material for: Lyophilizing SERS biosensors to enable translation into an easy-to-use assay
Source: Royal Society of Chemistry journal article supplement (doi:10.1039/d4ay01667j), 2024-01-01
Supplement: d4ay01667j1.zip [file d4ay01667j1.zip]

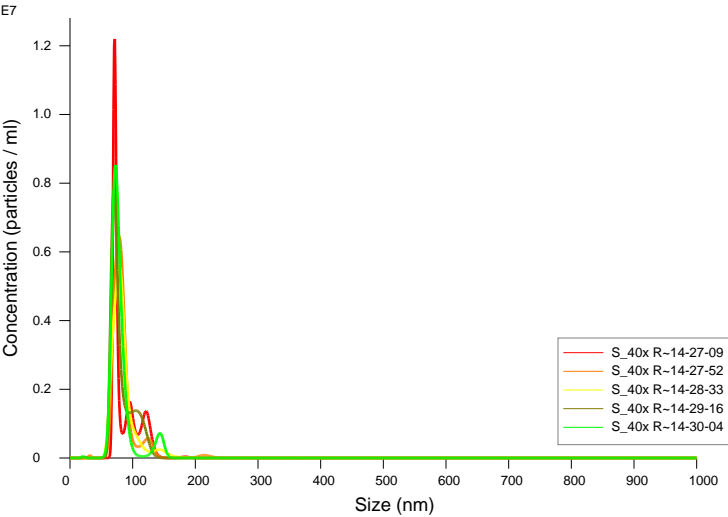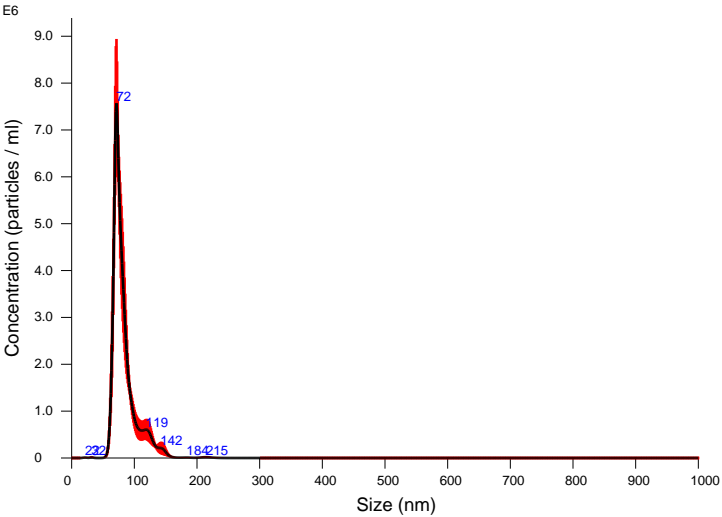

|                                                                                                                                                                                                                                                                                                                                                                                                                                                                                                                                                                                                                                                                                                                                                                                                                                                                                                                                                                                                                                                                        |                                                                                                                                                                                                                                                                                                                                                                                                                                                                                                                                                                                                                                                                                                                                                               |
|------------------------------------------------------------------------------------------------------------------------------------------------------------------------------------------------------------------------------------------------------------------------------------------------------------------------------------------------------------------------------------------------------------------------------------------------------------------------------------------------------------------------------------------------------------------------------------------------------------------------------------------------------------------------------------------------------------------------------------------------------------------------------------------------------------------------------------------------------------------------------------------------------------------------------------------------------------------------------------------------------------------------------------------------------------------------|---------------------------------------------------------------------------------------------------------------------------------------------------------------------------------------------------------------------------------------------------------------------------------------------------------------------------------------------------------------------------------------------------------------------------------------------------------------------------------------------------------------------------------------------------------------------------------------------------------------------------------------------------------------------------------------------------------------------------------------------------------------|
| <div><div>Included Files</div><div>S_40x RT41 2023-06-28 14-27-09<br/>S_40x RT41 2023-06-28 14-27-52<br/>S_40x RT41 2023-06-28 14-28-33<br/>S_40x RT41 2023-06-28 14-29-16<br/>S_40x RT41 2023-06-28 14-30-04</div><div><div>Details</div><div><div>NTA Version:NTA 3.4 Build 3.4.4</div><div>Script Used:SOP Standard Measurement 02-26-39PM 28Jun2023.txt</div><div>Time Captured:14:26:39 28/06/2023</div><div>Operator:LN</div><div>Pre-treatment:</div><div>Sample Name:S_40x RT41</div><div>Diluent:</div><div>Remarks:</div></div><div><div>Capture Settings</div><div><div>Camera Type:sCMOS</div><div>Laser Type:Green</div><div>Camera Level:6</div><div>Slider Shutter:64</div><div>Slider Gain:5</div><div>FPS25.0</div><div>Number of Frames:749</div><div>Temperature:24.4 °C</div><div>Viscosity:(Water) 0.9 cP</div><div>Dilution factor:Dilution not recorded</div></div><div><div>Analysis Settings</div><div><div>Detect Threshold:5</div><div>Blur Size:Auto</div><div>Max Jump Distance:Auto: 19.4 - 23.8 pix</div></div></div></div></div></div> | <div><div>Results</div><div><div>Stats: Merged Data</div><div><div>Mean:83.2 nm</div><div>Mode:71.5 nm</div><div>SD:19.7 nm</div><div>D10:67.1 nm</div><div>D50:77.0 nm</div><div>D90:111.3 nm</div></div><div><div>Stats: Mean +/- Standard Error</div><div><div>Mean:83.3 +/- 1.0 nm</div><div>Mode:74.1 +/- 1.8 nm</div><div>SD:19.6 +/- 0.7 nm</div><div>D10:67.2 +/- 0.7 nm</div><div>D50:76.9 +/- 1.2 nm</div><div>D90:107.4 +/- 4.3 nm</div></div><div><div>Concentration (Upgrade):</div><div>1.60e+08 +/- 5.02e+06 particles/ml</div><div>26.5 +/- 0.9 particles/frame</div><div>42.5 +/- 3.8 centres/frame</div></div><div><div>Concentration measurements may be unreliable</div><div>See summary file for more info</div></div></div></div></div> |
|------------------------------------------------------------------------------------------------------------------------------------------------------------------------------------------------------------------------------------------------------------------------------------------------------------------------------------------------------------------------------------------------------------------------------------------------------------------------------------------------------------------------------------------------------------------------------------------------------------------------------------------------------------------------------------------------------------------------------------------------------------------------------------------------------------------------------------------------------------------------------------------------------------------------------------------------------------------------------------------------------------------------------------------------------------------------|---------------------------------------------------------------------------------------------------------------------------------------------------------------------------------------------------------------------------------------------------------------------------------------------------------------------------------------------------------------------------------------------------------------------------------------------------------------------------------------------------------------------------------------------------------------------------------------------------------------------------------------------------------------------------------------------------------------------------------------------------------------|

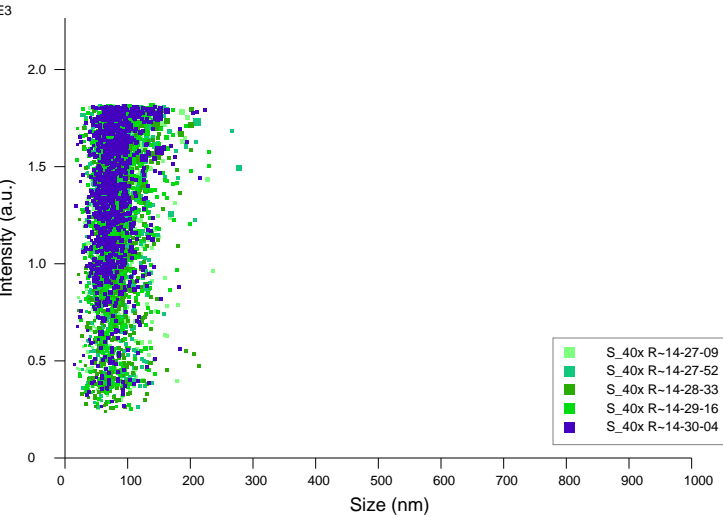

Intensity / Size graph for Experiment:  
S\_40x RT41 2023-06-28 14-26-39
