# Supplementary material for: Lyophilizing SERS biosensors to enable translation into an easy-to-use assay
Source: Royal Society of Chemistry journal article supplement (doi:10.1039/d4ay01667j), 2024-01-01
Supplement: d4ay01667j1.zip [file d4ay01667j1.zip]

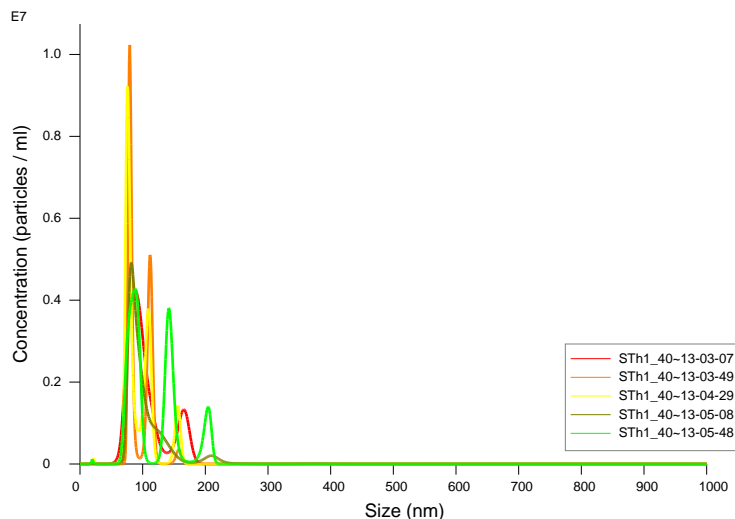

FTLA Concentration / Size graph for Experiment:  
STh1\_40x FD21 2023-06-14 13-02-53

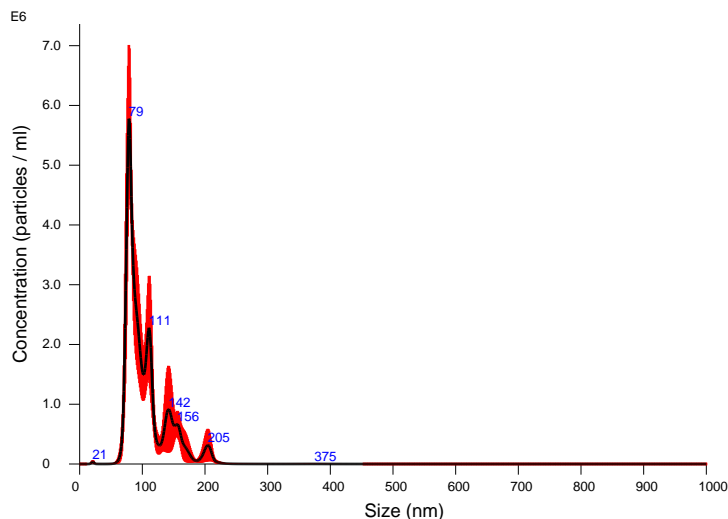

Averaged FTLA Concentration / Size for Experiment:  
STh1\_40x FD21 2023-06-14 13-02-53  
Error bars indicate + / - 1 standard error of the mean

### Included Files

STh1\_40x FD21 2023-06-14 13-03-07  
STh1\_40x FD21 2023-06-14 13-03-49  
STh1\_40x FD21 2023-06-14 13-04-29  
STh1\_40x FD21 2023-06-14 13-05-08  
STh1\_40x FD21 2023-06-14 13-05-48

### Details

NTA Version: NTA 3.4 Build 3.4.4  
Script Used: SOP Standard Measurement 01-02-53PM 14Jun2023.txt  
Time Captured: 13:02:53 14/06/2023  
Operator: LN  
Pre-treatment:  
Sample Name: STh1\_40x FD21  
Diluent:  
Remarks:

### Capture Settings

Camera Type: sCMOS  
Laser Type: Green  
Camera Level: 6  
Slider Shutter: 64  
Slider Gain: 5  
FPS: 25.0  
Number of Frames: 749  
Temperature: 25.4 °C  
Viscosity: (Water) 0.879 - 0.880 cP  
Dilution factor: Dilution not recorded

### Analysis Settings

Detect Threshold: 5  
Blur Size: Auto  
Max Jump Distance: Auto: 19.2 - 20.4 pix

### Results

#### Stats: Merged Data

Mean: 103.7 nm  
Mode: 78.9 nm  
SD: 32.7 nm  
D10: 75.5 nm  
D50: 92.1 nm  
D90: 151.8 nm

#### Stats: Mean +/- Standard Error

Mean: 102.9 +/- 4.2 nm  
Mode: 82.4 +/- 2.3 nm  
SD: 30.0 +/- 3.8 nm  
D10: 75.9 +/- 0.8 nm  
D50: 89.9 +/- 2.7 nm  
D90: 146.2 +/- 14.5 nm  
Concentration (Upgrade): 1.68e+08 +/- 1.22e+07 particles/ml  
26.9 +/- 1.7 particles/frame  
59.9 +/- 10.0 centres/frame

Concentration measurements may be unreliable  
See summary file for more info

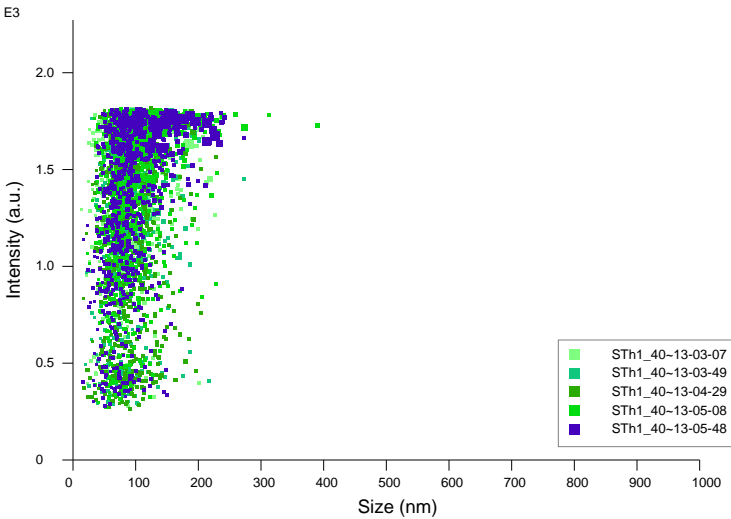

Intensity / Size graph for Experiment:  
STh1\_40x FD21 2023-06-14 13-02-53
