# Supplementary material for: Lyophilizing SERS biosensors to enable translation into an easy-to-use assay
Source: Royal Society of Chemistry journal article supplement (doi:10.1039/d4ay01667j), 2024-01-01
Supplement: d4ay01667j1.zip [file d4ay01667j1.zip]

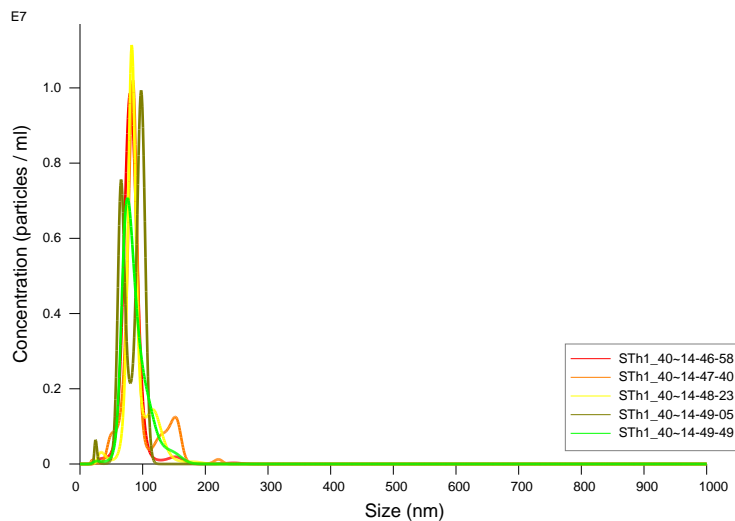

FTLA Concentration / Size graph for Experiment:  
STh1\_40x RT34 2023-06-21 14-46-14

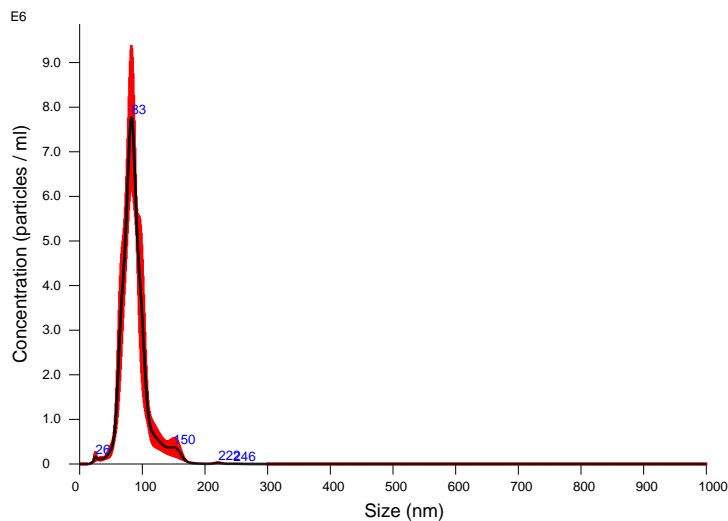

Averaged FTLA Concentration / Size for Experiment:  
STh1\_40x RT34 2023-06-21 14-46-14  
Error bars indicate + / - 1 standard error of the mean

### Included Files

STh1\_40x RT34 2023-06-21 14-46-58  
STh1\_40x RT34 2023-06-21 14-47-40  
STh1\_40x RT34 2023-06-21 14-48-23  
STh1\_40x RT34 2023-06-21 14-49-05  
STh1\_40x RT34 2023-06-21 14-49-49

### Details

NTA Version: NTA 3.4 Build 3.4.4  
Script Used: SOP Standard Measurement 02-46-14PM 21Jun2023.txt  
Time Captured: 14:46:14 21/06/2023  
Operator: LN  
Pre-treatment:  
Sample Name: STh1\_40x RT34  
Diluent:  
Remarks:

### Capture Settings

Camera Type: sCMOS  
Laser Type: Green  
Camera Level: 6  
Slider Shutter: 64  
Slider Gain: 5  
FPS: 25.0  
Number of Frames: 749  
Temperature: 24.6 °C  
Viscosity: (Water) 0.895 - 0.896 cP  
Dilution factor: Dilution not recorded

### Analysis Settings

Detect Threshold: 5  
Blur Size: Auto  
Max Jump Distance: Auto: 19.8 - 20.9 pix

### Results

#### Stats: Merged Data

Mean: 87.2 nm  
Mode: 82.7 nm  
SD: 22.1 nm  
D10: 65.7 nm  
D50: 84.1 nm  
D90: 110.7 nm

#### Stats: Mean +/- Standard Error

Mean: 87.3 +/- 1.8 nm  
Mode: 84.1 +/- 3.7 nm  
SD: 21.4 +/- 2.0 nm  
D10: 67.4 +/- 1.9 nm  
D50: 84.6 +/- 1.4 nm  
D90: 115.6 +/- 7.9 nm  
Concentration (Upgrade): 2.64e+08 +/- 8.61e+06 particles/ml  
42.1 +/- 1.3 particles/frame  
129.7 +/- 10.0 centres/frame

Concentration measurements may be unreliable  
See summary file for more info

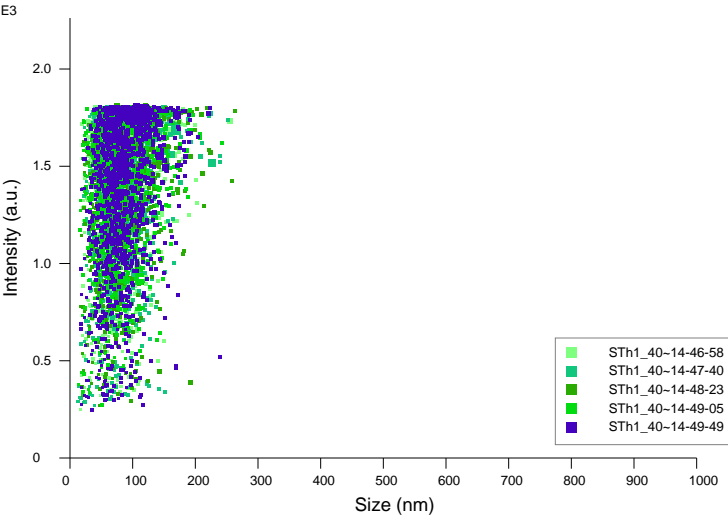

Intensity / Size graph for Experiment:  
STh1\_40x RT34 2023-06-21 14-46-14
