# Supplementary material for: Lyophilizing SERS biosensors to enable translation into an easy-to-use assay
Source: Royal Society of Chemistry journal article supplement (doi:10.1039/d4ay01667j), 2024-01-01
Supplement: d4ay01667j1.zip [file d4ay01667j1.zip]

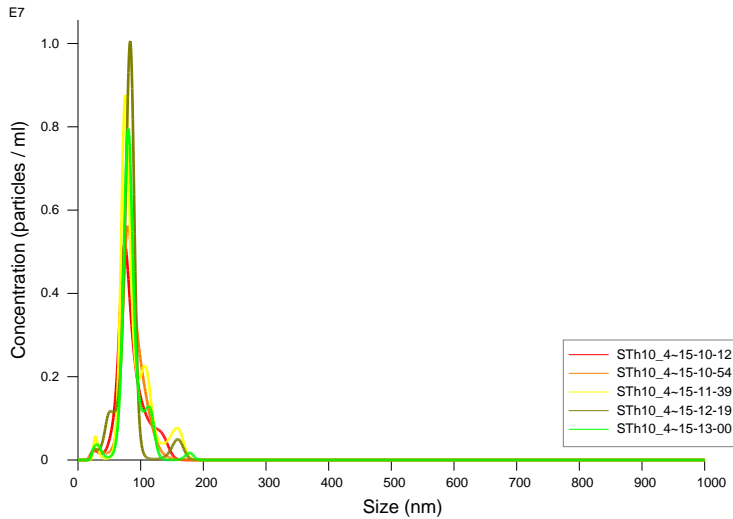

FTLA Concentration / Size graph for Experiment:  
STh10\_40x RT41 2023-06-28 15-09-58

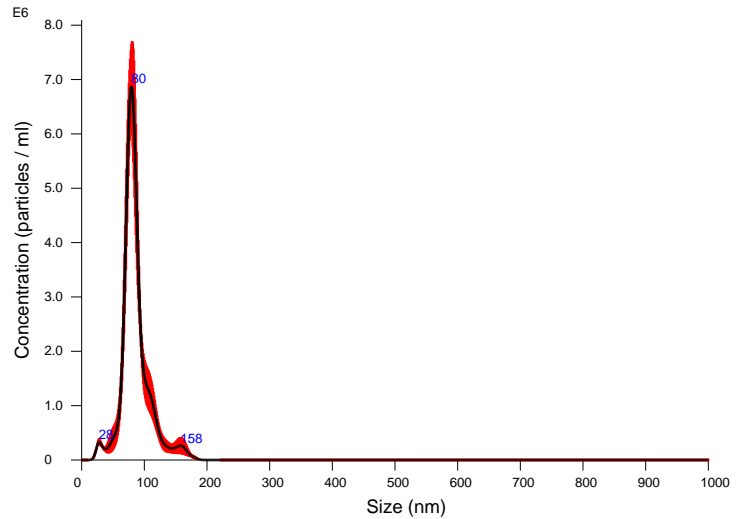

Averaged FTLA Concentration / Size for Experiment:  
STh10\_40x RT41 2023-06-28 15-09-58  
Error bars indicate + / - 1 standard error of the mean

### Included Files

STh10\_40x RT41 2023-06-28 15-10-12  
STh10\_40x RT41 2023-06-28 15-10-54  
STh10\_40x RT41 2023-06-28 15-11-39  
STh10\_40x RT41 2023-06-28 15-12-19  
STh10\_40x RT41 2023-06-28 15-13-00

### Details

NTA Version: NTA 3.4 Build 3.4.4  
Script Used: SOP Standard Measurement 03-09-58PM 28Jun2023.txt  
Time Captured: 15:09:58 28/06/2023  
Operator: LN  
Pre-treatment:  
Sample Name: STh10\_40x RT41  
Diluent:  
Remarks:

### Capture Settings

Camera Type: sCMOS  
Laser Type: Green  
Camera Level: 6  
Slider Shutter: 64  
Slider Gain: 5  
FPS: 25.0  
Number of Frames: 749  
Temperature: 25.2 °C  
Viscosity: (Water) 0.883 - 0.884 cP  
Dilution factor: Dilution not recorded

### Analysis Settings

Detect Threshold: 5  
Blur Size: Auto  
Max Jump Distance: Auto: 20.7 - 24.0 pix

### Results

#### Stats: Merged Data

Mean: 85.6 nm  
Mode: 79.5 nm  
SD: 22.9 nm  
D10: 65.5 nm  
D50: 81.8 nm  
D90: 113.2 nm

#### Stats: Mean +/- Standard Error

Mean: 85.4 +/- 1.4 nm  
Mode: 78.6 +/- 1.6 nm  
SD: 22.3 +/- 1.3 nm  
D10: 64.8 +/- 2.2 nm  
D50: 81.8 +/- 0.7 nm  
D90: 112.0 +/- 5.6 nm  
Concentration (Upgrade): 2.10e+08 +/- 1.30e+07 particles/ml  
34.9 +/- 2.1 particles/frame  
146.5 +/- 9.2 centres/frame

Concentration measurements may be unreliable  
See summary file for more info

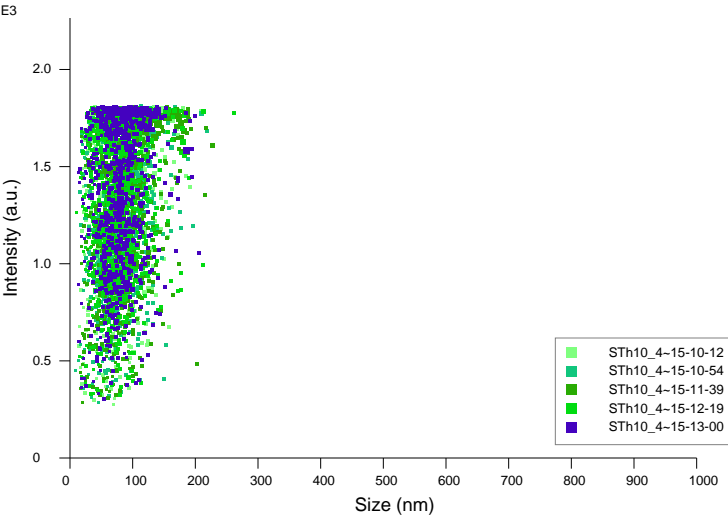

Intensity / Size graph for Experiment:  
STh10\_40x RT41 2023-06-28 15-09-58
