# Supplementary material for: Lyophilizing SERS biosensors to enable translation into an easy-to-use assay
Source: Royal Society of Chemistry journal article supplement (doi:10.1039/d4ay01667j), 2024-01-01
Supplement: d4ay01667j1.zip [file d4ay01667j1.zip]

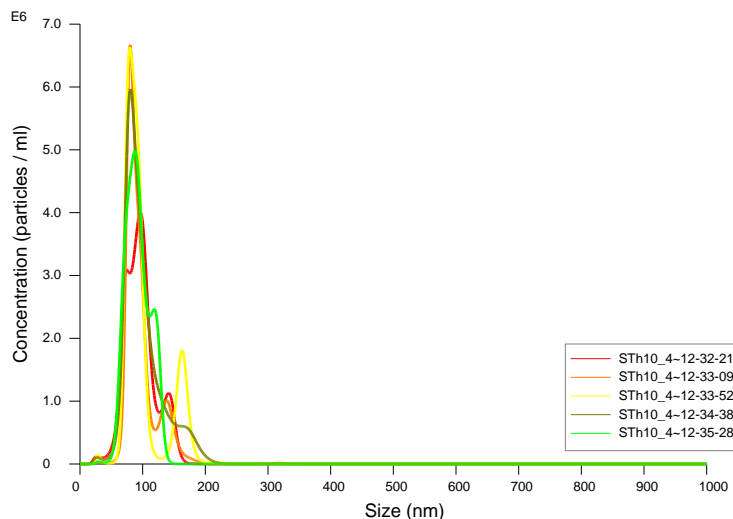

FTLA Concentration / Size graph for Experiment:  
STh10\_40x RT0 2023-05-18 12-31-55

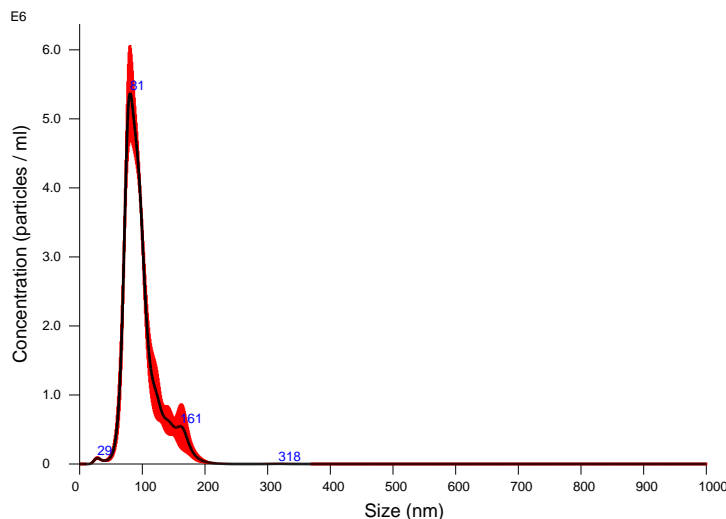

Averaged FTLA Concentration / Size for Experiment:  
STh10\_40x RT0 2023-05-18 12-31-55  
Error bars indicate + / - 1 standard error of the mean

### Included Files

STh10\_40x RT0 2023-05-18 12-32-21  
STh10\_40x RT0 2023-05-18 12-33-09  
STh10\_40x RT0 2023-05-18 12-33-52  
STh10\_40x RT0 2023-05-18 12-34-38  
STh10\_40x RT0 2023-05-18 12-35-28

### Details

NTA Version: NTA 3.4 Build 3.4.4  
Script Used: SOP Standard Measurement 12-31-55PM 18May2023.txt  
Time Captured: 12:31:55 18/05/2023  
Operator: LN  
Pre-treatment:  
Sample Name: STh10\_40x RT0  
Diluent:  
Remarks:

### Capture Settings

Camera Type: sCMOS  
Laser Type: Green  
Camera Level: 6  
Slider Shutter: 64  
Slider Gain: 5  
FPS: 25.0  
Number of Frames: 749  
Temperature: 24.2 °C  
Viscosity: (Water) 0.903 - 0.905 cP  
Dilution factor: Dilution not recorded

### Analysis Settings

Detect Threshold: 5  
Blur Size: Auto  
Max Jump Distance: Auto: 18.7 - 20.9 pix

### Results

#### Stats: Merged Data

Mean: 96.9 nm  
Mode: 80.5 nm  
SD: 27.6 nm  
D10: 71.2 nm  
D50: 90.2 nm  
D90: 137.5 nm

#### Stats: Mean +/- Standard Error

Mean: 96.8 +/- 1.4 nm  
Mode: 84.9 +/- 3.2 nm  
SD: 26.8 +/- 2.4 nm  
D10: 71.0 +/- 1.2 nm  
D50: 90.4 +/- 1.0 nm  
D90: 140.1 +/- 6.9 nm  
Concentration (Upgrade): 2.30e+08 +/- 1.09e+07 particles/ml  
37.7 +/- 1.7 particles/frame  
103.4 +/- 9.3 centres/frame

Concentration measurements may be unreliable  
See summary file for more info

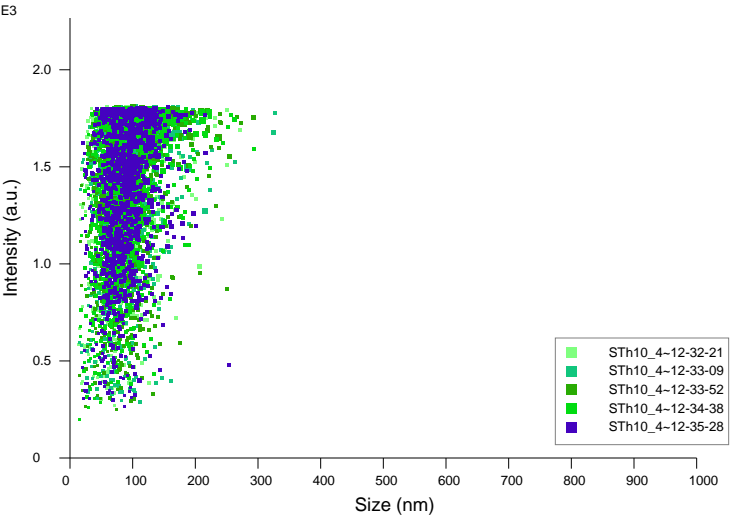

Intensity / Size graph for Experiment:  
STh10\_40x RT0 2023-05-18 12-31-55
