# Supplementary material for: Lyophilizing SERS biosensors to enable translation into an easy-to-use assay
Source: Royal Society of Chemistry journal article supplement (doi:10.1039/d4ay01667j), 2024-01-01
Supplement: d4ay01667j1.zip [file d4ay01667j1.zip]

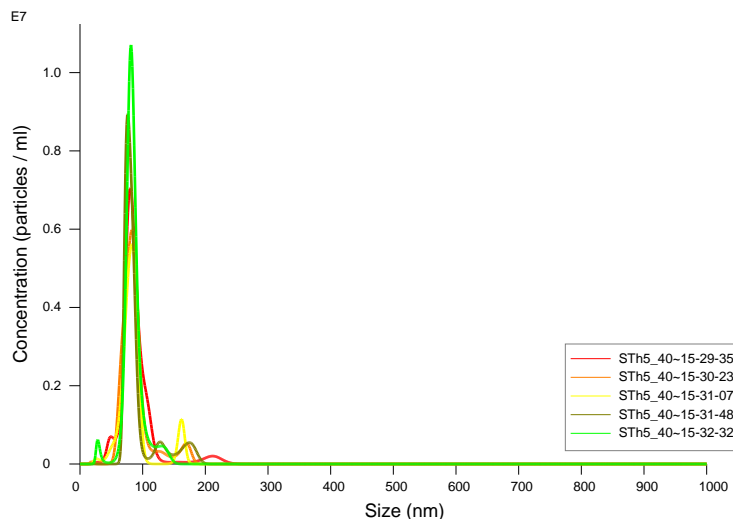

FTLA Concentration / Size graph for Experiment:  
STh5\_40x FD35 2023-06-28 15-29-19

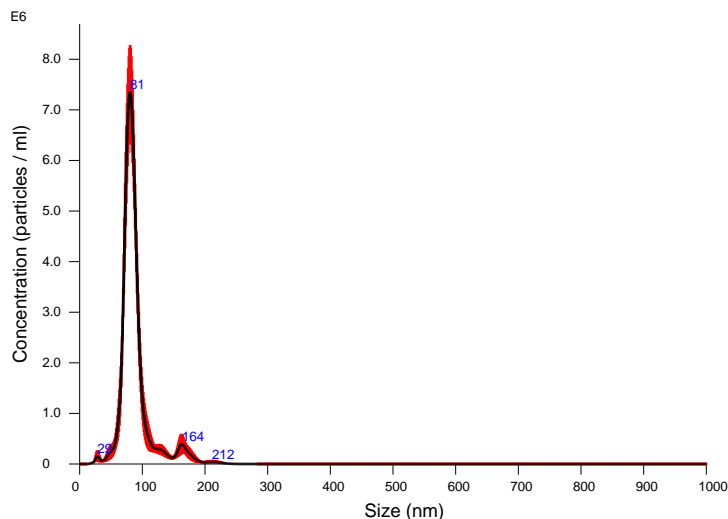

Averaged FTLA Concentration / Size for Experiment:  
STh5\_40x FD35 2023-06-28 15-29-19  
Error bars indicate + / - 1 standard error of the mean

### Included Files

STh5\_40x FD35 2023-06-28 15-29-35  
STh5\_40x FD35 2023-06-28 15-30-23  
STh5\_40x FD35 2023-06-28 15-31-07  
STh5\_40x FD35 2023-06-28 15-31-48  
STh5\_40x FD35 2023-06-28 15-32-32

### Details

NTA Version: NTA 3.4 Build 3.4.4  
Script Used: SOP Standard Measurement 03-29-19PM 28Jun2023.txt  
Time Captured: 15:29:19 28/06/2023  
Operator: LN  
Pre-treatment:  
Sample Name: STh5\_40x FD35  
Diluent:  
Remarks:

### Capture Settings

Camera Type: sCMOS  
Laser Type: Green  
Camera Level: 6  
Slider Shutter: 64  
Slider Gain: 5  
FPS: 25.0  
Number of Frames: 749  
Temperature: 25.6 °C  
Viscosity: (Water) 0.875 - 0.876 cP  
Dilution factor: Dilution not recorded

### Analysis Settings

Detect Threshold: 5  
Blur Size: Auto  
Max Jump Distance: Auto: 20.9 - 23.9 pix

### Results

#### Stats: Merged Data

Mean: 87.9 nm  
Mode: 80.5 nm  
SD: 25.7 nm  
D10: 68.8 nm  
D50: 82.4 nm  
D90: 112.1 nm

#### Stats: Mean +/- Standard Error

Mean: 88.0 +/- 1.1 nm  
Mode: 80.7 +/- 1.3 nm  
SD: 25.3 +/- 2.3 nm  
D10: 68.2 +/- 1.4 nm  
D50: 82.4 +/- 0.5 nm  
D90: 114.2 +/- 7.3 nm  
Concentration (Upgrade): 2.01e+08 +/- 1.08e+07 particles/ml  
33.3 +/- 1.7 particles/frame  
92.3 +/- 6.8 centres/frame

Concentration measurements may be unreliable  
See summary file for more info

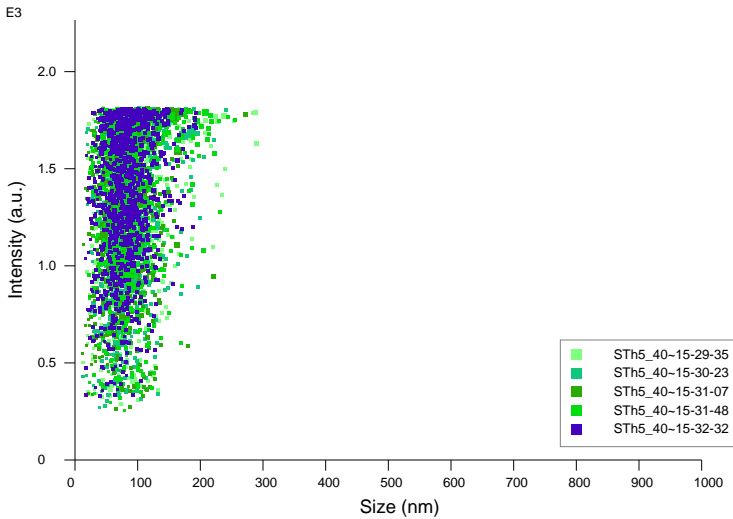

Intensity / Size graph for Experiment:  
STh5\_40x FD35 2023-06-28 15-29-19
