# Supplementary material for: Lyophilizing SERS biosensors to enable translation into an easy-to-use assay
Source: Royal Society of Chemistry journal article supplement (doi:10.1039/d4ay01667j), 2024-01-01
Supplement: d4ay01667j1.zip [file d4ay01667j1.zip]

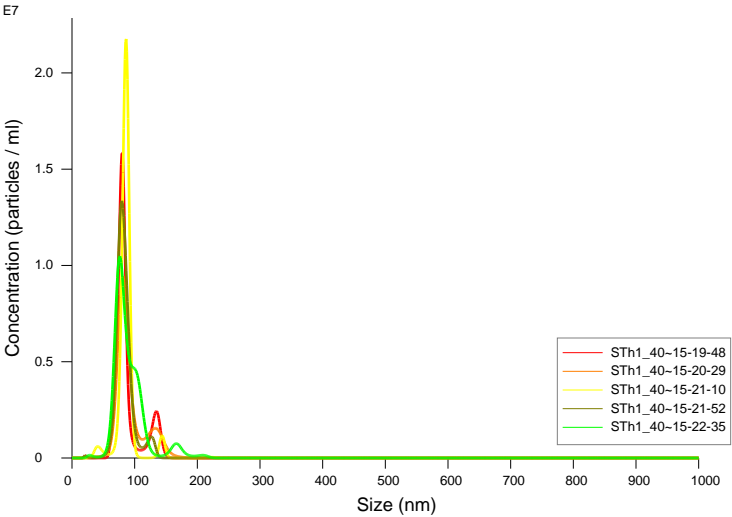

FTLA Concentration / Size graph for Experiment:  
STh1\_40x F 2023-05-24 15-19-35

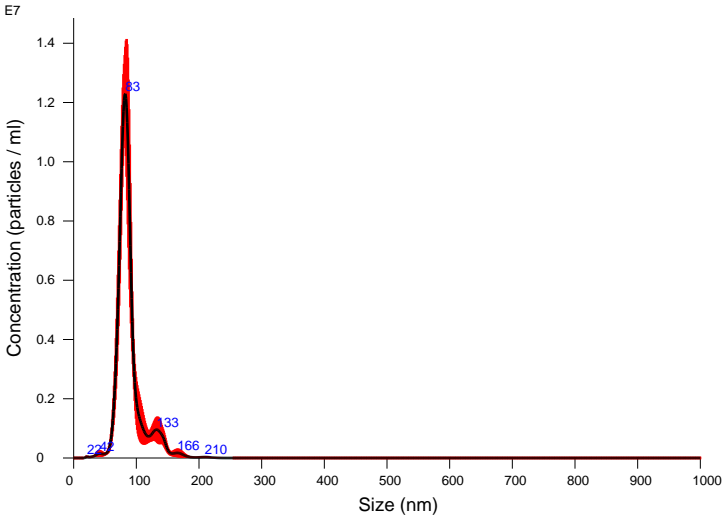

Averaged FTLA Concentration / Size for Experiment:  
STh1\_40x F 2023-05-24 15-19-35  
Error bars indicate + / - 1 standard error of the mean

|                                                                                                                                                                                                                                                                                                                                                                                                                                                                                                                                                                                                                                                                                                                                                                                                                                                                                                                                                                                                                                                                                                                          |                                                                                                                                                                                                                                                                                                                                                                                                                                                                                                                                                                                                                                                                                                        |
|--------------------------------------------------------------------------------------------------------------------------------------------------------------------------------------------------------------------------------------------------------------------------------------------------------------------------------------------------------------------------------------------------------------------------------------------------------------------------------------------------------------------------------------------------------------------------------------------------------------------------------------------------------------------------------------------------------------------------------------------------------------------------------------------------------------------------------------------------------------------------------------------------------------------------------------------------------------------------------------------------------------------------------------------------------------------------------------------------------------------------|--------------------------------------------------------------------------------------------------------------------------------------------------------------------------------------------------------------------------------------------------------------------------------------------------------------------------------------------------------------------------------------------------------------------------------------------------------------------------------------------------------------------------------------------------------------------------------------------------------------------------------------------------------------------------------------------------------|
| <div>Included Files</div> <div>STh1_40x F 2023-05-24 15-19-48</div> <div>STh1_40x F 2023-05-24 15-20-29</div> <div>STh1_40x F 2023-05-24 15-21-10</div> <div>STh1_40x F 2023-05-24 15-21-52</div> <div>STh1_40x F 2023-05-24 15-22-35</div> <div>Details</div> <div>NTA Version: NTA 3.4 Build 3.4.4</div> <div>Script Used: SOP Standard Measurement 03-19-35PM 24May2023.txt</div> <div>Time Captured: 15:19:35 24/05/2023</div> <div>Operator: LN</div> <div>Pre-treatment:</div> <div>Sample Name: STh1_40x F</div> <div>Diluent:</div> <div>Remarks: Dilution from concentrated NPs+HITC</div> <div>Capture Settings</div> <div>Camera Type: sCMOS</div> <div>Laser Type: Green</div> <div>Camera Level: 7</div> <div>Slider Shutter: 121</div> <div>Slider Gain: 24</div> <div>FPS: 25.0</div> <div>Number of Frames: 749</div> <div>Temperature: 25.8 - 25.8 °C</div> <div>Viscosity: (Water) 0.872 - 0.873 cP</div> <div>Dilution factor: Dilution not recorded</div> <div>Analysis Settings</div> <div>Detect Threshold: 5</div> <div>Blur Size: Auto</div> <div>Max Jump Distance: Auto: 19.9 - 20.6 pix</div> | <div>Results</div> <div>Stats: Merged Data</div> <div>Mean: 88.3 nm</div> <div>Mode: 82.1 nm</div> <div>SD: 21.1 nm</div> <div>D10: 70.6 nm</div> <div>D50: 83.6 nm</div> <div>D90: 116.4 nm</div> <div>Stats: Mean +/- Standard Error</div> <div>Mean: 88.3 +/- 1.5 nm</div> <div>Mode: 80.7 +/- 1.6 nm</div> <div>SD: 20.3 +/- 2.2 nm</div> <div>D10: 71.4 +/- 1.5 nm</div> <div>D50: 83.5 +/- 1.0 nm</div> <div>D90: 114.1 +/- 7.7 nm</div> <div>Concentration (Upgrade): 3.15e+08 +/- 1.34e+07 particles/ml</div> <div>49.2 +/- 1.9 particles/frame</div> <div>115.2 +/- 8.4 centres/frame</div> <div>Concentration measurements may be unreliable</div> <div>See summary file for more info</div> |
|--------------------------------------------------------------------------------------------------------------------------------------------------------------------------------------------------------------------------------------------------------------------------------------------------------------------------------------------------------------------------------------------------------------------------------------------------------------------------------------------------------------------------------------------------------------------------------------------------------------------------------------------------------------------------------------------------------------------------------------------------------------------------------------------------------------------------------------------------------------------------------------------------------------------------------------------------------------------------------------------------------------------------------------------------------------------------------------------------------------------------|--------------------------------------------------------------------------------------------------------------------------------------------------------------------------------------------------------------------------------------------------------------------------------------------------------------------------------------------------------------------------------------------------------------------------------------------------------------------------------------------------------------------------------------------------------------------------------------------------------------------------------------------------------------------------------------------------------|

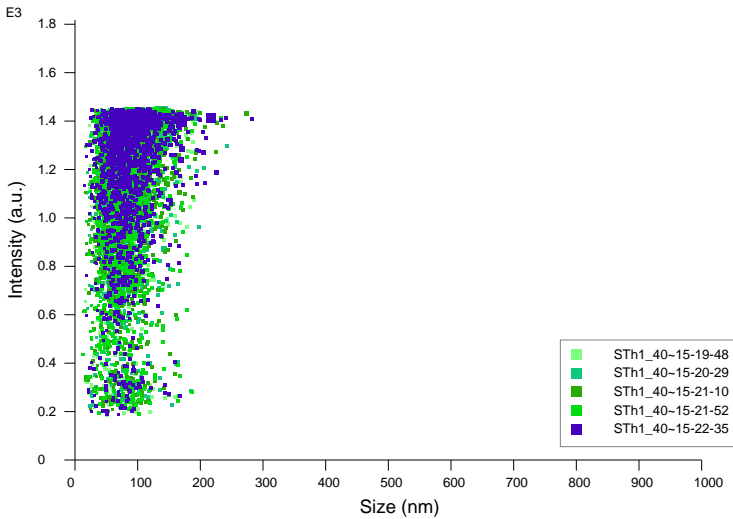

Intensity / Size graph for Experiment:  
STh1\_40x F 2023-05-24 15-19-35
