# Supplementary material for: Lyophilizing SERS biosensors to enable translation into an easy-to-use assay
Source: Royal Society of Chemistry journal article supplement (doi:10.1039/d4ay01667j), 2024-01-01
Supplement: d4ay01667j1.zip [file d4ay01667j1.zip]

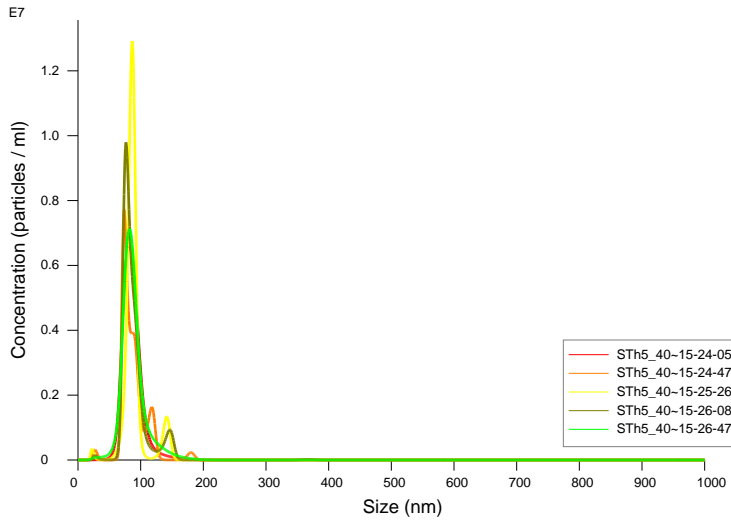

FTLA Concentration / Size graph for Experiment:  
STh5\_40x FD28 2023-06-21 15-23-42

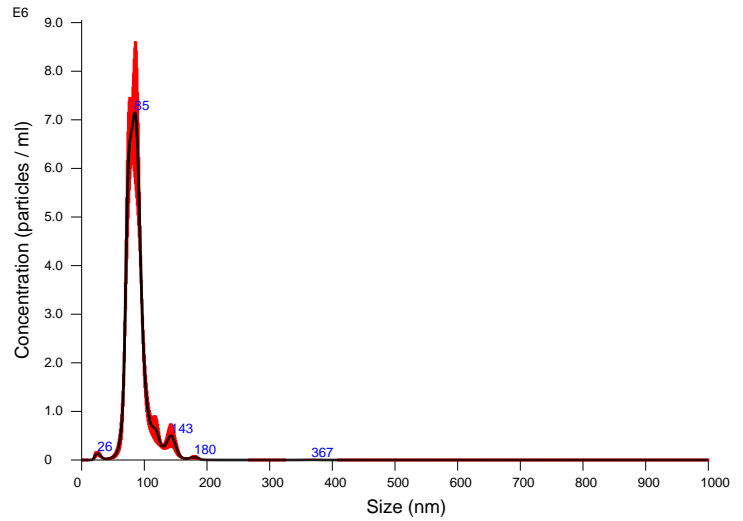

Averaged FTLA Concentration / Size for Experiment:  
STh5\_40x FD28 2023-06-21 15-23-42  
Error bars indicate + / - 1 standard error of the mean

### Included Files

STh5\_40x FD28 2023-06-21 15-24-05  
STh5\_40x FD28 2023-06-21 15-24-47  
STh5\_40x FD28 2023-06-21 15-25-26  
STh5\_40x FD28 2023-06-21 15-26-08  
STh5\_40x FD28 2023-06-21 15-26-47

### Details

NTA Version: NTA 3.4 Build 3.4.4  
Script Used: SOP Standard Measurement 03-23-42PM 21Jun2023.txt  
Time Captured: 15:23:42 21/06/2023  
Operator: LN  
Pre-treatment:  
Sample Name: STh5\_40x FD28  
Diluent:  
Remarks:

### Capture Settings

Camera Type: sCMOS  
Laser Type: Green  
Camera Level: 6  
Slider Shutter: 64  
Slider Gain: 5  
FPS: 25.0  
Number of Frames: 749  
Temperature: 25.4 °C  
Viscosity: (Water) 0.9 cP  
Dilution factor: Dilution not recorded

### Analysis Settings

Detect Threshold: 5  
Blur Size: Auto  
Max Jump Distance: Auto: 20.3 - 24.3 pix

### Results

#### Stats: Merged Data

Mean: 88.1 nm  
Mode: 85.0 nm  
SD: 20.0 nm  
D10: 71.3 nm  
D50: 84.7 nm  
D90: 110.0 nm

#### Stats: Mean +/- Standard Error

Mean: 88.1 +/- 0.6 nm  
Mode: 80.2 +/- 2.3 nm  
SD: 19.8 +/- 1.3 nm  
D10: 71.7 +/- 1.3 nm  
D50: 84.2 +/- 0.7 nm  
D90: 109.1 +/- 2.6 nm  
Concentration (Upgrade): 2.15e+08 +/- 8.59e+06 particles/ml  
35.2 +/- 1.3 particles/frame  
93.6 +/- 4.0 centres/frame

Concentration measurements may be unreliable  
See summary file for more info

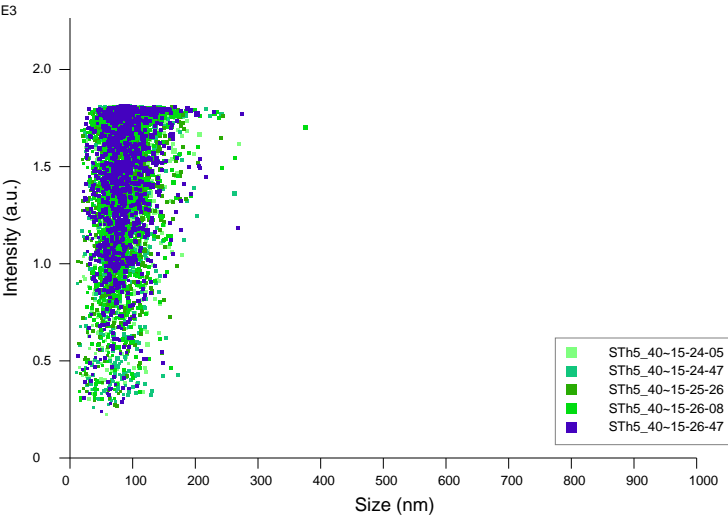

Intensity / Size graph for Experiment:  
STh5\_40x FD28 2023-06-21 15-23-42
