# Supplementary material for: Lyophilizing SERS biosensors to enable translation into an easy-to-use assay
Source: Royal Society of Chemistry journal article supplement (doi:10.1039/d4ay01667j), 2024-01-01
Supplement: d4ay01667j1.zip [file d4ay01667j1.zip]

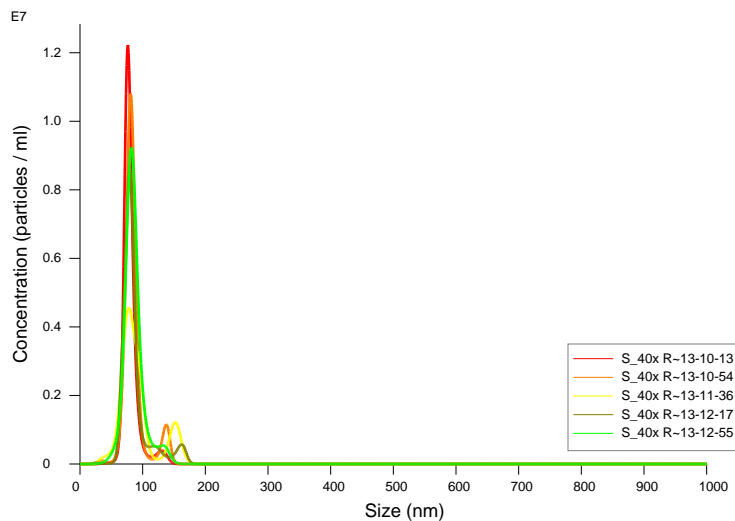

FTLA Concentration / Size graph for Experiment:  
S\_40x RT27\_2 2023-06-14 13-09-52

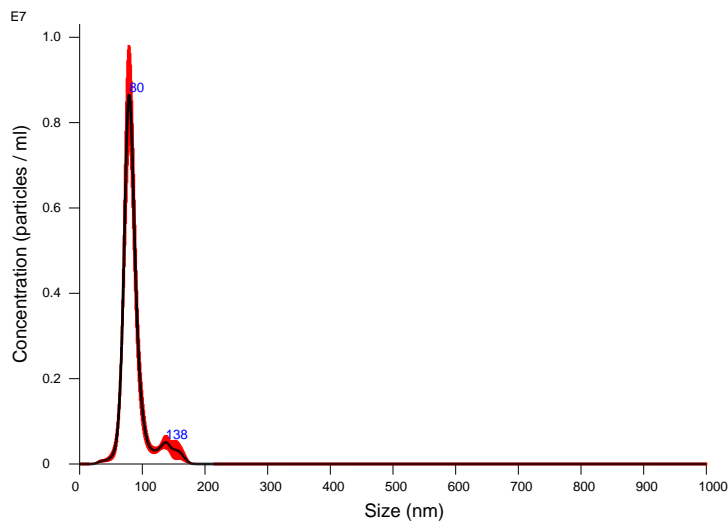

Averaged FTLA Concentration / Size for Experiment:  
S\_40x RT27\_2 2023-06-14 13-09-52  
Error bars indicate + / - 1 standard error of the mean

### Included Files

S\_40x RT27\_2 2023-06-14 13-10-13  
S\_40x RT27\_2 2023-06-14 13-10-54  
S\_40x RT27\_2 2023-06-14 13-11-36  
S\_40x RT27\_2 2023-06-14 13-12-17  
S\_40x RT27\_2 2023-06-14 13-12-55

### Details

NTA Version: NTA 3.4 Build 3.4.4  
Script Used: SOP Standard Measurement 01-09-52PM 14Jun2023.txt  
Time Captured: 13:09:52 14/06/2023  
Operator: LN  
Pre-treatment:  
Sample Name: S\_40x RT27\_2  
Diluent:  
Remarks:

### Capture Settings

Camera Type: sCMOS  
Laser Type: Green  
Camera Level: 6  
Slider Shutter: 64  
Slider Gain: 5  
FPS: 25.0  
Number of Frames: 749  
Temperature: 25.5 °C  
Viscosity: (Water) 0.878 - 0.879 cP  
Dilution factor: Dilution not recorded

### Analysis Settings

Detect Threshold: 5  
Blur Size: Auto  
Max Jump Distance: Auto: 20.5 - 22.6 pix

### Results

#### Stats: Merged Data

Mean: 85.9 nm  
Mode: 79.1 nm  
SD: 20.7 nm  
D10: 68.7 nm  
D50: 81.2 nm  
D90: 109.3 nm

#### Stats: Mean +/- Standard Error

Mean: 86.1 +/- 1.8 nm  
Mode: 79.3 +/- 1.0 nm  
SD: 20.0 +/- 2.8 nm  
D10: 68.4 +/- 1.1 nm  
D50: 81.6 +/- 1.1 nm  
D90: 112.9 +/- 9.6 nm  
Concentration (Upgrade): 2.19e+08 +/- 1.03e+07 particles/ml  
35.5 +/- 1.6 particles/frame  
96.4 +/- 7.9 centres/frame

Concentration measurements may be unreliable  
See summary file for more info

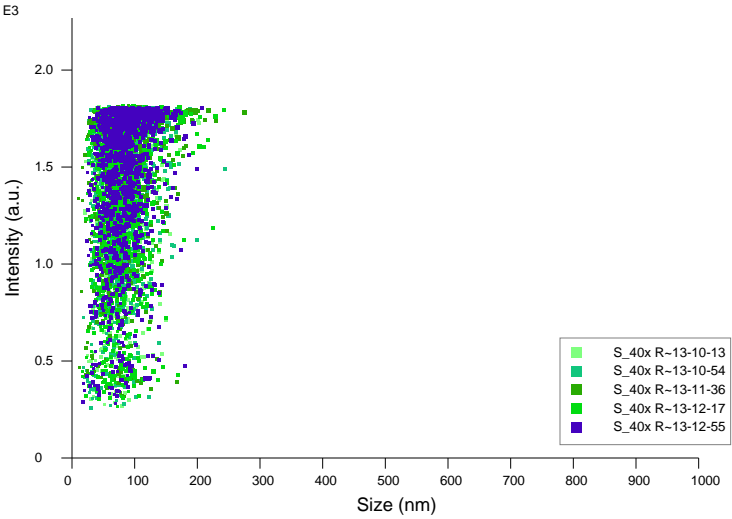

Intensity / Size graph for Experiment:  
S\_40x RT27\_2 2023-06-14 13-09-52
