# Supplementary material for: Lyophilizing SERS biosensors to enable translation into an easy-to-use assay
Source: Royal Society of Chemistry journal article supplement (doi:10.1039/d4ay01667j), 2024-01-01
Supplement: d4ay01667j1.zip [file d4ay01667j1.zip]

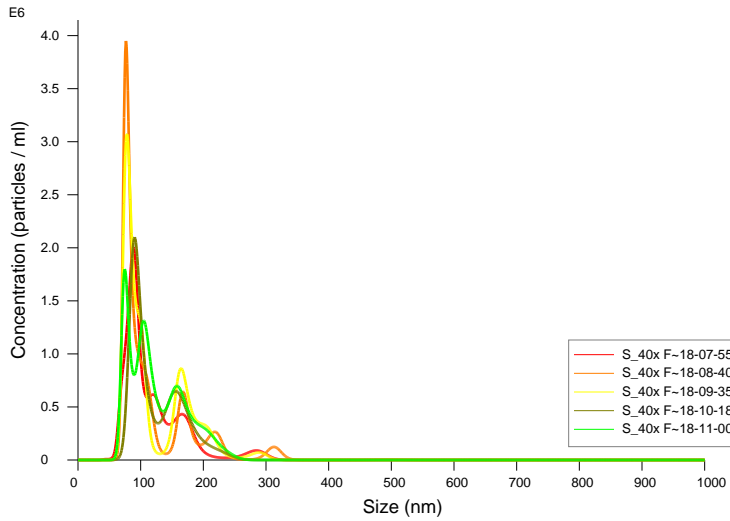

FTLA Concentration / Size graph for Experiment:  
S\_40x FD0 2023-05-24 18-07-42

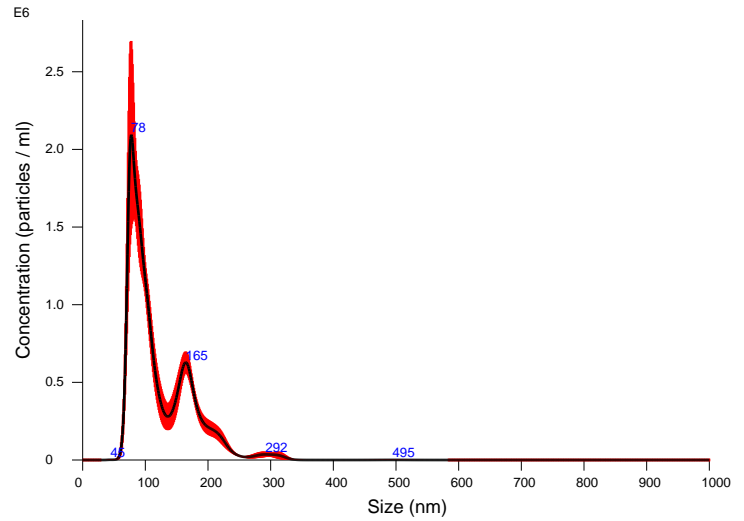

Averaged FTLA Concentration / Size for Experiment:  
S\_40x FD0 2023-05-24 18-07-42  
Error bars indicate + / - 1 standard error of the mean

### Included Files

S\_40x FD0 2023-05-24 18-07-55  
S\_40x FD0 2023-05-24 18-08-40  
S\_40x FD0 2023-05-24 18-09-35  
S\_40x FD0 2023-05-24 18-10-18  
S\_40x FD0 2023-05-24 18-11-00

### Details

NTA Version: NTA 3.4 Build 3.4.4  
Script Used: SOP Standard Measurement 06-07-42PM 24May2023.txt  
Time Captured: 18:07:42 24/05/2023  
Operator: LN  
Pre-treatment:  
Sample Name: S\_40x FD0  
Diluent:  
Remarks: Dilution from concentrated NPs+HITC

### Capture Settings

Camera Type: sCMOS  
Laser Type: Green  
Camera Level: 7  
Slider Shutter: 121  
Slider Gain: 24  
FPS: 25.0  
Number of Frames: 749  
Temperature: 24.7 °C  
Viscosity: (Water) 0.893 - 0.894 cP  
Dilution factor: Dilution not recorded

### Analysis Settings

Detect Threshold: 5  
Blur Size: Auto  
Max Jump Distance: Auto: 15.9 - 17.4 pix

### Results

#### Stats: Merged Data

Mean: 120.8 nm  
Mode: 77.6 nm  
SD: 50.1 nm  
D10: 74.8 nm  
D50: 101.2 nm  
D90: 189.3 nm

#### Stats: Mean +/- Standard Error

Mean: 120.9 +/- 1.5 nm  
Mode: 81.7 +/- 3.2 nm  
SD: 49.2 +/- 3.2 nm  
D10: 76.0 +/- 1.9 nm  
D50: 101.0 +/- 4.0 nm  
D90: 190.1 +/- 4.5 nm  
Concentration (Upgrade): 1.08e+08 +/- 5.35e+06 particles/ml  
17.7 +/- 0.9 particles/frame  
27.0 +/- 1.7 centres/frame

Concentration measurements may be unreliable  
See summary file for more info

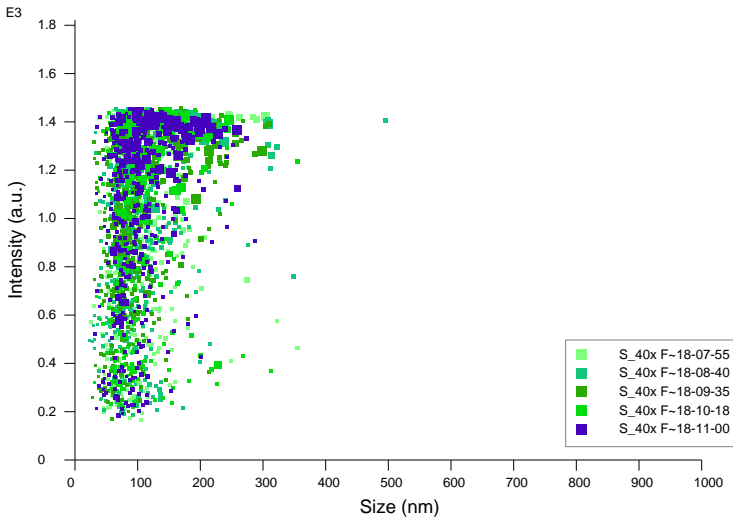

Intensity / Size graph for Experiment:  
S\_40x FD0 2023-05-24 18-07-42
