# Supplementary material for: Lyophilizing SERS biosensors to enable translation into an easy-to-use assay
Source: Royal Society of Chemistry journal article supplement (doi:10.1039/d4ay01667j), 2024-01-01
Supplement: d4ay01667j1.zip [file d4ay01667j1.zip]

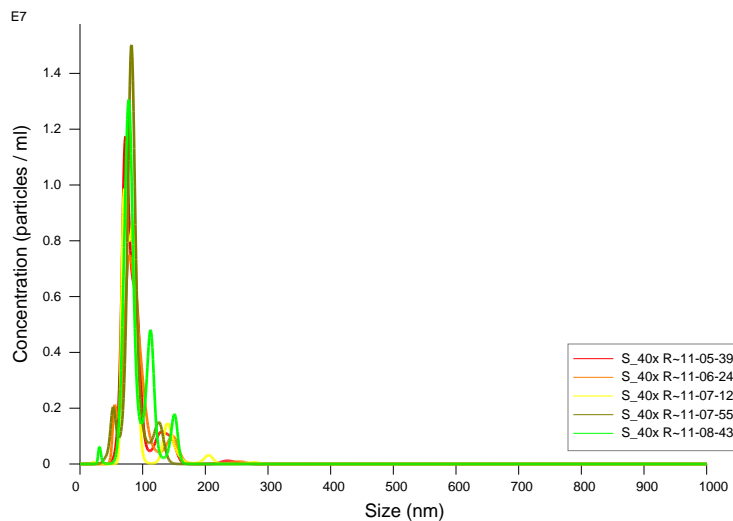

FTLA Concentration / Size graph for Experiment:  
S\_40x RT20 2023-06-07 11-05-02

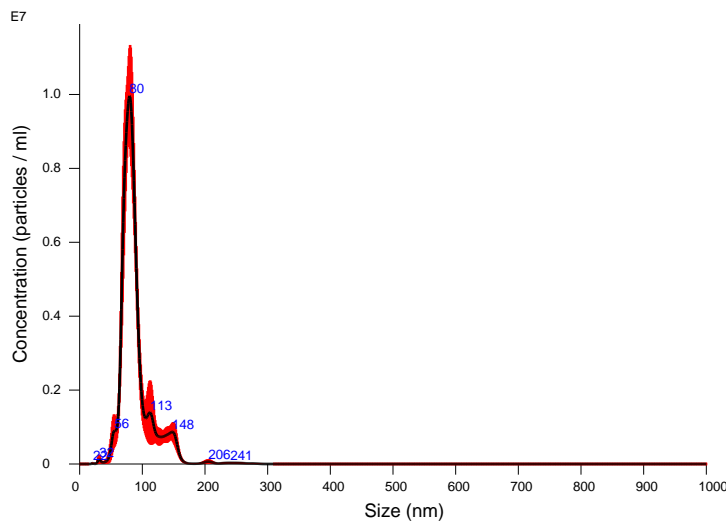

Averaged FTLA Concentration / Size for Experiment:  
S\_40x RT20 2023-06-07 11-05-02  
Error bars indicate + / - 1 standard error of the mean

### Included Files

S\_40x RT20 2023-06-07 11-05-39  
S\_40x RT20 2023-06-07 11-06-24  
S\_40x RT20 2023-06-07 11-07-12  
S\_40x RT20 2023-06-07 11-07-55  
S\_40x RT20 2023-06-07 11-08-43

### Details

NTA Version: NTA 3.4 Build 3.4.4  
Script Used: SOP Standard Measurement 11-05-02AM 07Jun2023.txt  
Time Captured: 11:05:02 07/06/2023  
Operator: LN  
Pre-treatment:  
Sample Name: S\_40x RT20  
Diluent:  
Remarks:

### Capture Settings

Camera Type: sCMOS  
Laser Type: Green  
Camera Level: 7  
Slider Shutter: 121  
Slider Gain: 24  
FPS: 25.0  
Number of Frames: 749  
Temperature: 24.2 °C  
Viscosity: (Water) 0.9 cP  
Dilution factor: Dilution not recorded

### Analysis Settings

Detect Threshold: 5  
Blur Size: Auto  
Max Jump Distance: Auto: 19.5 - 20.2 pix

### Results

#### Stats: Merged Data

Mean: 88.6 nm  
Mode: 79.7 nm  
SD: 25.7 nm  
D10: 67.7 nm  
D50: 82.0 nm  
D90: 122.8 nm

#### Stats: Mean +/- Standard Error

Mean: 88.6 +/- 1.1 nm  
Mode: 76.5 +/- 2.1 nm  
SD: 25.4 +/- 2.2 nm  
D10: 67.3 +/- 0.7 nm  
D50: 82.0 +/- 0.8 nm  
D90: 124.9 +/- 4.7 nm  
Concentration (Upgrade): 3.07e+08 +/- 1.33e+07 particles/ml  
49.1 +/- 1.7 particles/frame  
106.9 +/- 8.2 centres/frame

Concentration measurements may be unreliable  
See summary file for more info

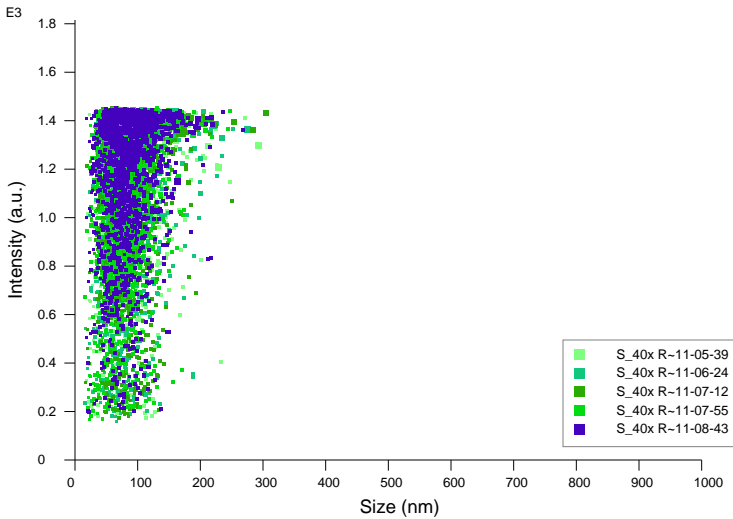

Intensity / Size graph for Experiment:  
S\_40x RT20 2023-06-07 11-05-02
