# Supplementary material for: Lyophilizing SERS biosensors to enable translation into an easy-to-use assay
Source: Royal Society of Chemistry journal article supplement (doi:10.1039/d4ay01667j), 2024-01-01
Supplement: d4ay01667j1.zip [file d4ay01667j1.zip]

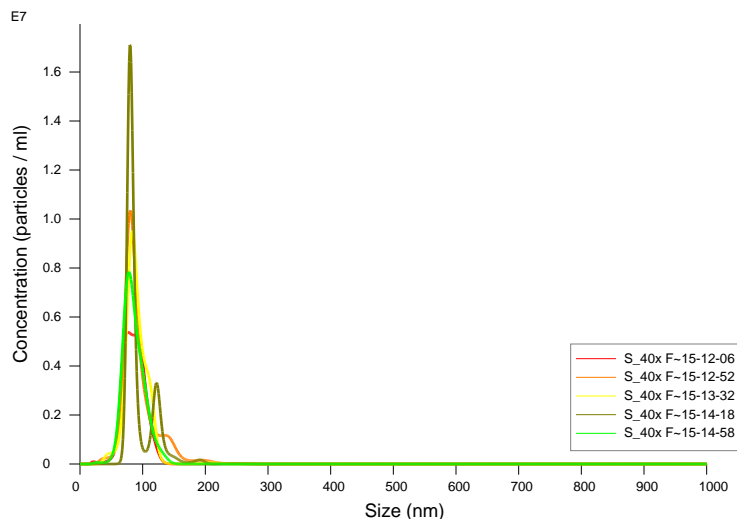

FTLA Concentration / Size graph for Experiment:  
S\_40x F 2023-05-24 15-11-41

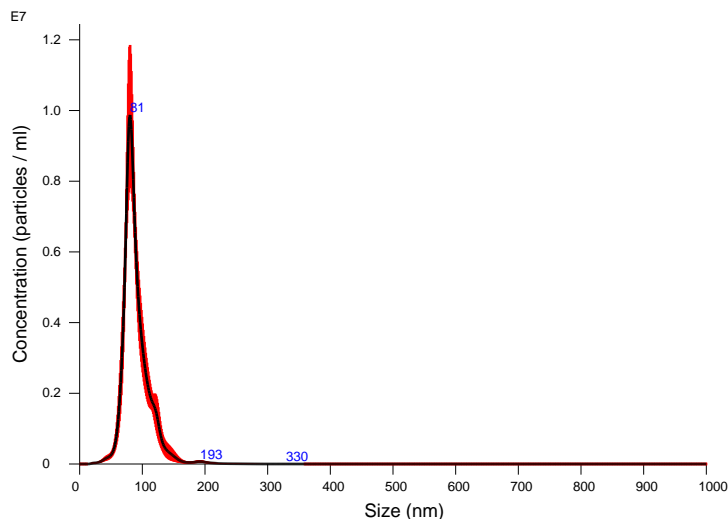

Averaged FTLA Concentration / Size for Experiment:  
S\_40x F 2023-05-24 15-11-41  
Error bars indicate + / - 1 standard error of the mean

### Included Files

S\_40x F 2023-05-24 15-12-06  
S\_40x F 2023-05-24 15-12-52  
S\_40x F 2023-05-24 15-13-32  
S\_40x F 2023-05-24 15-14-18  
S\_40x F 2023-05-24 15-14-58

### Details

NTA Version: NTA 3.4 Build 3.4.4  
Script Used: SOP Standard Measurement 03-11-41PM 24May2023.txt  
Time Captured: 15:11:41 24/05/2023  
Operator: LN  
Pre-treatment:  
Sample Name: S\_40x F  
Diluent:  
Remarks: Dilution from concentrated NPs+HITC

### Capture Settings

Camera Type: sCMOS  
Laser Type: Green  
Camera Level: 7  
Slider Shutter: 121  
Slider Gain: 24  
FPS: 25.0  
Number of Frames: 749  
Temperature: 25.7 - 25.8 °C  
Viscosity: (Water) 0.874 - 0.875 cP  
Dilution factor: Dilution not recorded

### Analysis Settings

Detect Threshold: 5  
Blur Size: Auto  
Max Jump Distance: Auto: 19.0 - 22.3 pix

### Results

#### Stats: Merged Data

Mean: 89.8 nm  
Mode: 80.3 nm  
SD: 21.8 nm  
D10: 69.8 nm  
D50: 84.9 nm  
D90: 117.0 nm

#### Stats: Mean +/- Standard Error

Mean: 89.5 +/- 1.5 nm  
Mode: 79.7 +/- 1.2 nm  
SD: 20.9 +/- 1.9 nm  
D10: 69.7 +/- 1.6 nm  
D50: 85.1 +/- 0.8 nm  
D90: 117.3 +/- 4.8 nm  
Concentration (Upgrade): 3.01e+08 +/- 1.65e+07 particles/ml  
45.8 +/- 1.9 particles/frame  
110.1 +/- 6.9 centres/frame

Concentration measurements may be unreliable  
See summary file for more info

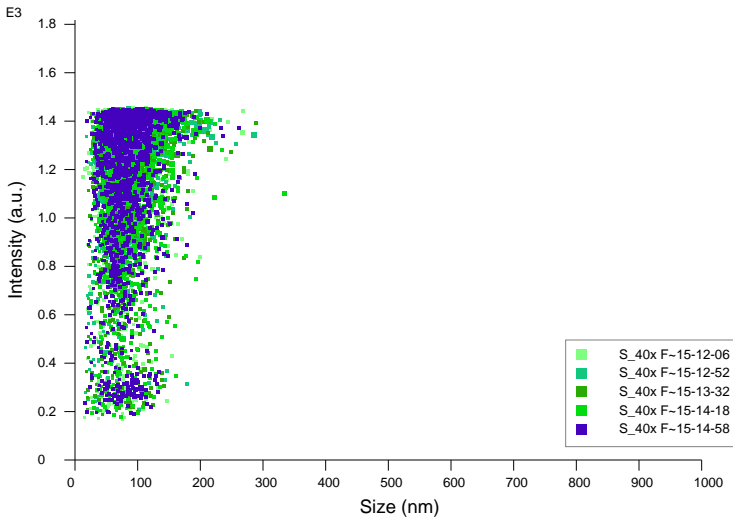

Intensity / Size graph for Experiment:  
S\_40x F 2023-05-24 15-11-41
