# Supplementary material for: Lyophilizing SERS biosensors to enable translation into an easy-to-use assay
Source: Royal Society of Chemistry journal article supplement (doi:10.1039/d4ay01667j), 2024-01-01
Supplement: d4ay01667j1.zip [file d4ay01667j1.zip]

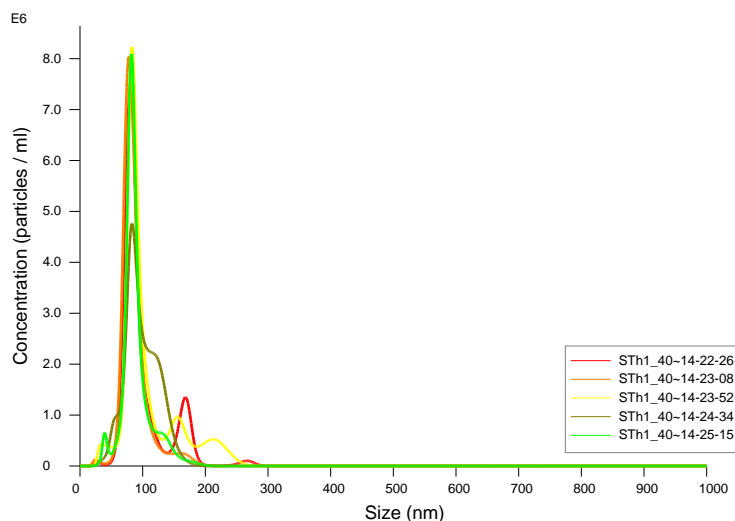

FTLA Concentration / Size graph for Experiment:  
STh1\_40x FD7\_well2 2023-05-31 14-22-11

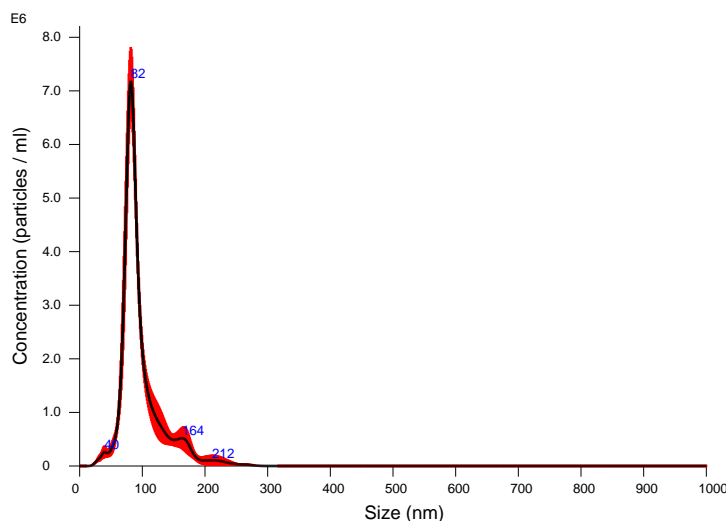

Averaged FTLA Concentration / Size for Experiment:  
STh1\_40x FD7\_well2 2023-05-31 14-22-11  
Error bars indicate + / - 1 standard error of the mean

### Included Files

STh1\_40x FD7\_well2 2023-05-31 14-22-26  
STh1\_40x FD7\_well2 2023-05-31 14-23-08  
STh1\_40x FD7\_well2 2023-05-31 14-23-52  
STh1\_40x FD7\_well2 2023-05-31 14-24-34  
STh1\_40x FD7\_well2 2023-05-31 14-25-15

### Details

NTA Version: NTA 3.4 Build 3.4.4  
Script Used: SOP Standard Measurement 02-22-11PM 31May2023.txt  
Time Captured: 14:22:11 31/05/2023  
Operator: LN  
Pre-treatment:  
Sample Name: STh1\_40x FD7\_well2  
Diluent:  
Remarks:

### Capture Settings

Camera Type: sCMOS  
Laser Type: Green  
Camera Level: 6  
Slider Shutter: 64  
Slider Gain: 5  
FPS: 25.0  
Number of Frames: 749  
Temperature: 26.4 °C  
Viscosity: (Water) 0.9 cP  
Dilution factor: Dilution not recorded

### Analysis Settings

Detect Threshold: 5  
Blur Size: Auto  
Max Jump Distance: Auto: 19.7 - 20.8 pix

### Results

#### Stats: Merged Data

Mean: 96.6 nm  
Mode: 81.7 nm  
SD: 34.0 nm  
D10: 69.4 nm  
D50: 86.4 nm  
D90: 144.2 nm

#### Stats: Mean +/- Standard Error

Mean: 96.0 +/- 3.7 nm  
Mode: 81.5 +/- 0.9 nm  
SD: 31.0 +/- 4.5 nm  
D10: 69.5 +/- 0.9 nm  
D50: 87.0 +/- 2.1 nm  
D90: 142.3 +/- 13.3 nm  
Concentration (Upgrade): 2.44e+08 +/- 1.23e+07 particles/ml  
39.2 +/- 1.6 particles/frame  
133.8 +/- 13.0 centres/frame

Concentration measurements may be unreliable  
See summary file for more info

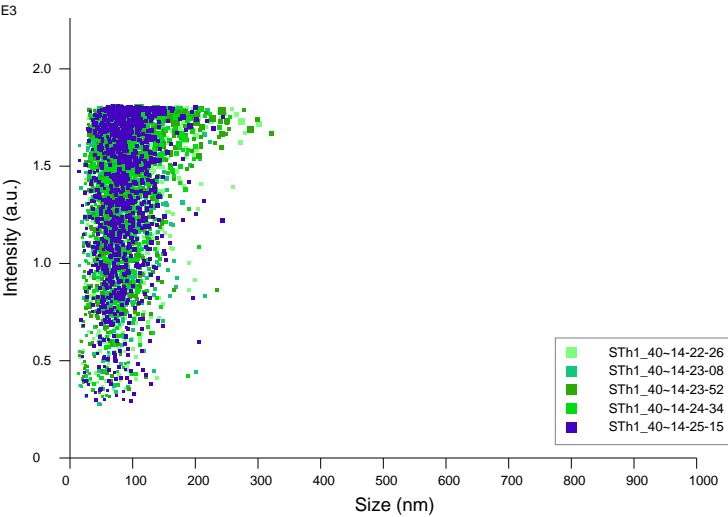

Intensity / Size graph for Experiment:  
STh1\_40x FD7\_well2 2023-05-31 14-22-11
