# Supplementary material for: Lyophilizing SERS biosensors to enable translation into an easy-to-use assay
Source: Royal Society of Chemistry journal article supplement (doi:10.1039/d4ay01667j), 2024-01-01
Supplement: d4ay01667j1.zip [file d4ay01667j1.zip]

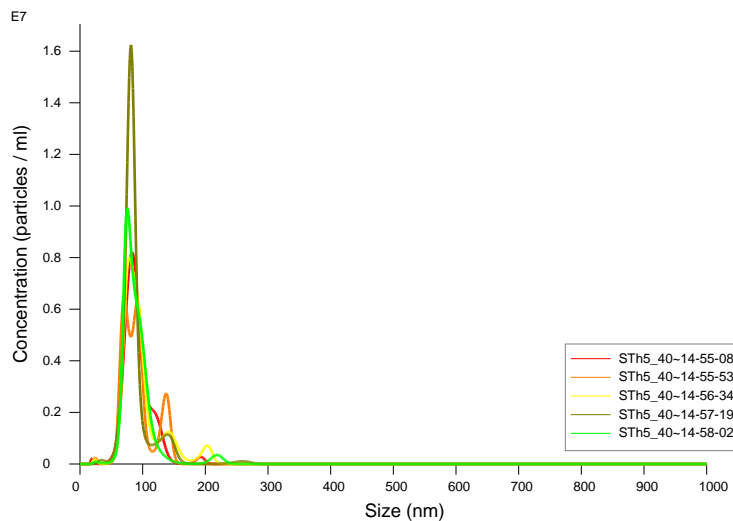

FTLA Concentration / Size graph for Experiment:  
STh5\_40x RT6 2023-05-24 14-54-54

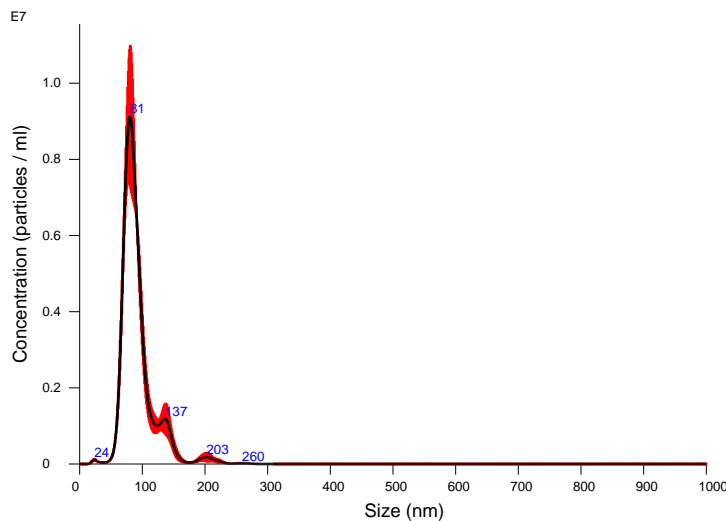

Averaged FTLA Concentration / Size for Experiment:  
STh5\_40x RT6 2023-05-24 14-54-54  
Error bars indicate + / - 1 standard error of the mean

### Included Files

STh5\_40x RT6 2023-05-24 14-55-08  
STh5\_40x RT6 2023-05-24 14-55-53  
STh5\_40x RT6 2023-05-24 14-56-34  
STh5\_40x RT6 2023-05-24 14-57-19  
STh5\_40x RT6 2023-05-24 14-58-02

### Details

NTA Version: NTA 3.4 Build 3.4.4  
Script Used: SOP Standard Measurement 02-54-54PM 24May2023.txt  
Time Captured: 14:54:54 24/05/2023  
Operator: LN  
Pre-treatment:  
Sample Name: STh5\_40x RT6  
Diluent:  
Remarks: Dilution from concentrated NPs+HITC

### Capture Settings

Camera Type: sCMOS  
Laser Type: Green  
Camera Level: 7  
Slider Shutter: 121  
Slider Gain: 24  
FPS: 25.0  
Number of Frames: 749  
Temperature: 25.5 - 25.5 °C  
Viscosity: (Water) 0.878 - 0.879 cP  
Dilution factor: Dilution not recorded

### Analysis Settings

Detect Threshold: 5  
Blur Size: Auto  
Max Jump Distance: Auto: 19.8 - 20.2 pix

### Results

#### Stats: Merged Data

Mean: 91.8 nm  
Mode: 80.3 nm  
SD: 27.1 nm  
D10: 68.8 nm  
D50: 85.2 nm  
D90: 127.4 nm

#### Stats: Mean +/- Standard Error

Mean: 91.9 +/- 1.6 nm  
Mode: 77.8 +/- 2.2 nm  
SD: 26.6 +/- 1.7 nm  
D10: 68.9 +/- 0.7 nm  
D50: 85.8 +/- 1.1 nm  
D90: 126.6 +/- 5.9 nm  
Concentration (Upgrade): 3.29e+08 +/- 1.42e+07 particles/ml  
50.8 +/- 2.2 particles/frame  
127.0 +/- 6.5 centres/frame

Concentration measurements may be unreliable  
See summary file for more info

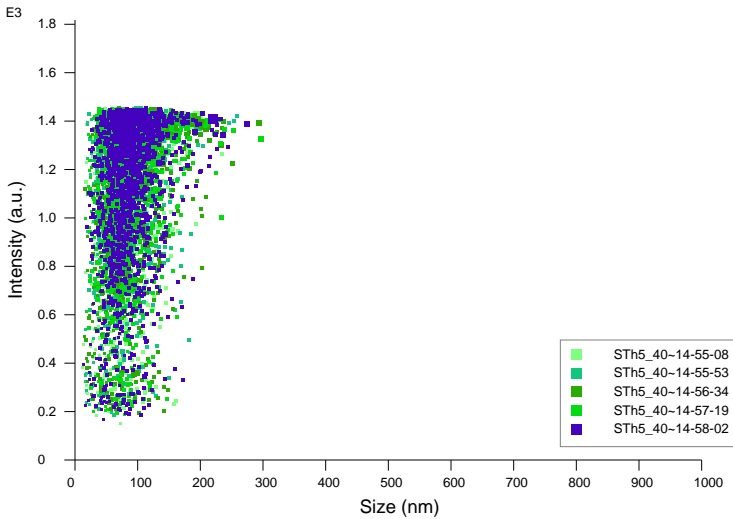

Intensity / Size graph for Experiment:  
STh5\_40x RT6 2023-05-24 14-54-54
