# Supplementary material for: Lyophilizing SERS biosensors to enable translation into an easy-to-use assay
Source: Royal Society of Chemistry journal article supplement (doi:10.1039/d4ay01667j), 2024-01-01
Supplement: d4ay01667j1.zip [file d4ay01667j1.zip]

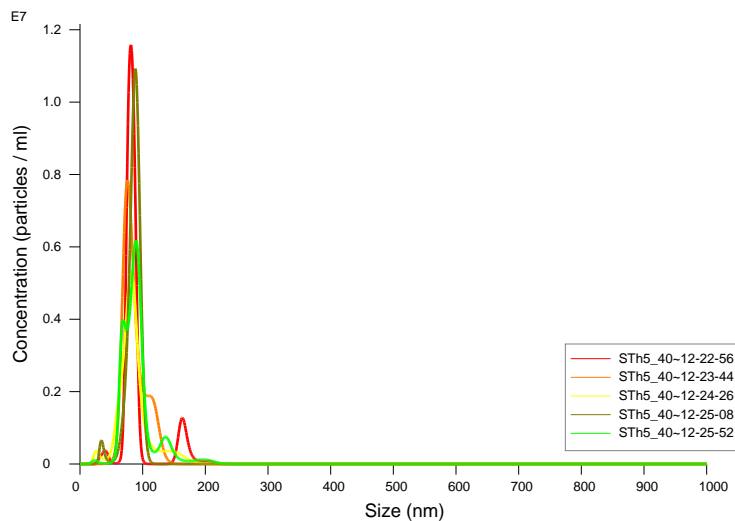

FTLA Concentration / Size graph for Experiment:  
STh5\_40x RT0 2023-05-18 12-22-30

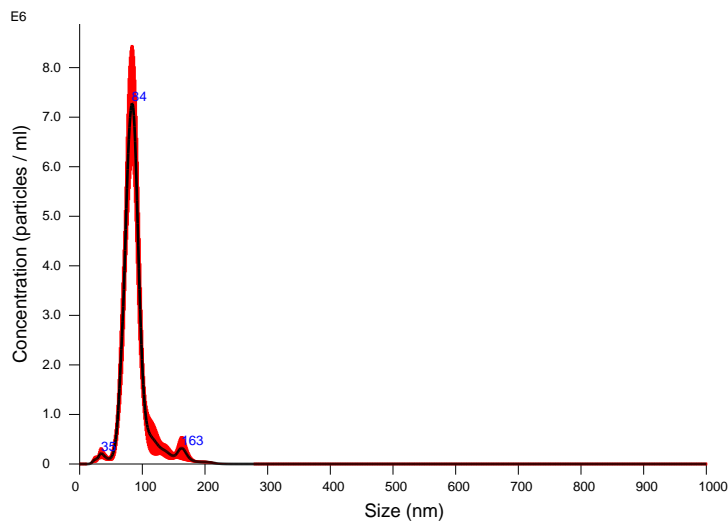

Averaged FTLA Concentration / Size for Experiment:  
STh5\_40x RT0 2023-05-18 12-22-30  
Error bars indicate + / - 1 standard error of the mean

### Included Files

STh5\_40x RT0 2023-05-18 12-22-56  
STh5\_40x RT0 2023-05-18 12-23-44  
STh5\_40x RT0 2023-05-18 12-24-26  
STh5\_40x RT0 2023-05-18 12-25-08  
STh5\_40x RT0 2023-05-18 12-25-52

### Details

NTA Version: NTA 3.4 Build 3.4.4  
Script Used: SOP Standard Measurement 12-22-30PM 18May2023.txt  
Time Captured: 12:22:30 18/05/2023  
Operator: LN  
Pre-treatment:  
Sample Name: STh5\_40x RT0  
Diluent:  
Remarks:

### Capture Settings

Camera Type: sCMOS  
Laser Type: Green  
Camera Level: 6  
Slider Shutter: 64  
Slider Gain: 5  
FPS: 25.0  
Number of Frames: 749  
Temperature: 24.0 - 24.0 °C  
Viscosity: (Water) 0.909 - 0.910 cP  
Dilution factor: Dilution not recorded

### Analysis Settings

Detect Threshold: 5  
Blur Size: Auto  
Max Jump Distance: Auto: 20.3 - 24.0 pix

### Results

#### Stats: Merged Data

Mean: 87.9 nm  
Mode: 83.8 nm  
SD: 23.0 nm  
D10: 68.3 nm  
D50: 84.3 nm  
D90: 109.9 nm

#### Stats: Mean +/- Standard Error

Mean: 87.9 +/- 1.2 nm  
Mode: 83.3 +/- 2.5 nm  
SD: 22.2 +/- 3.2 nm  
D10: 68.6 +/- 2.2 nm  
D50: 84.1 +/- 1.2 nm  
D90: 122.7 +/- 9.7 nm  
Concentration (Upgrade): 2.21e+08 +/- 9.42e+06 particles/ml  
36.6 +/- 1.6 particles/frame  
109.7 +/- 11.2 centres/frame

Concentration measurements may be unreliable  
See summary file for more info

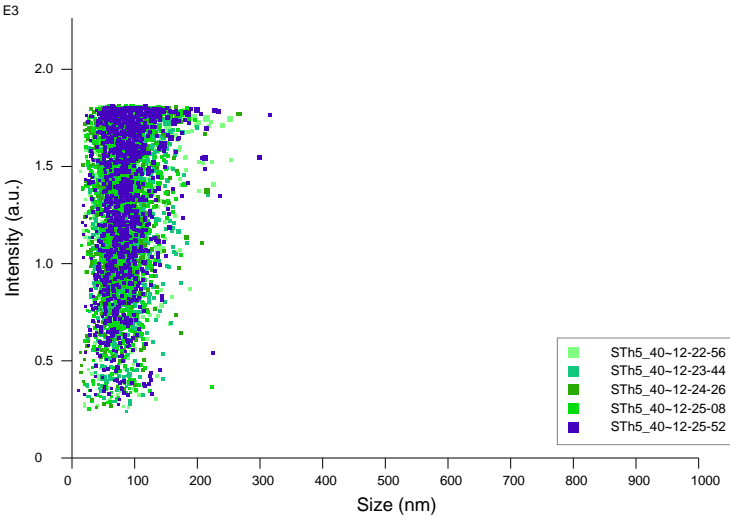

Intensity / Size graph for Experiment:  
STh5\_40x RT0 2023-05-18 12-22-30
