# Supplementary material for: Lyophilizing SERS biosensors to enable translation into an easy-to-use assay
Source: Royal Society of Chemistry journal article supplement (doi:10.1039/d4ay01667j), 2024-01-01
Supplement: d4ay01667j1.zip [file d4ay01667j1.zip]

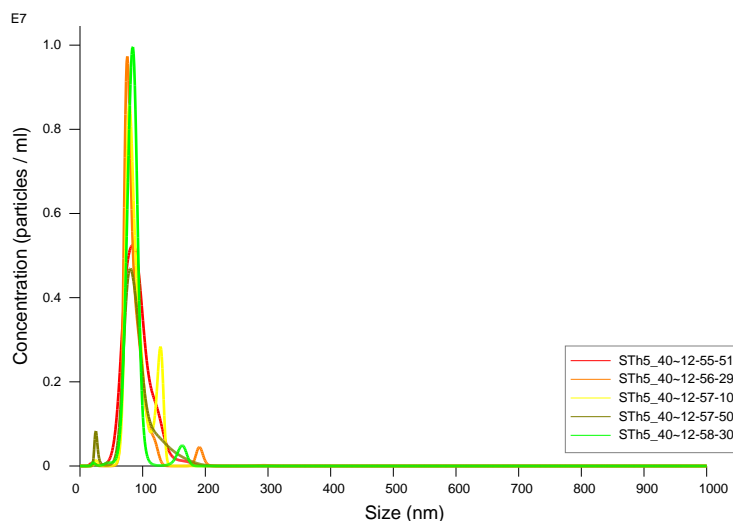

FTLA Concentration / Size graph for Experiment:  
STh5\_40x FD21 2023-06-14 12-55-32

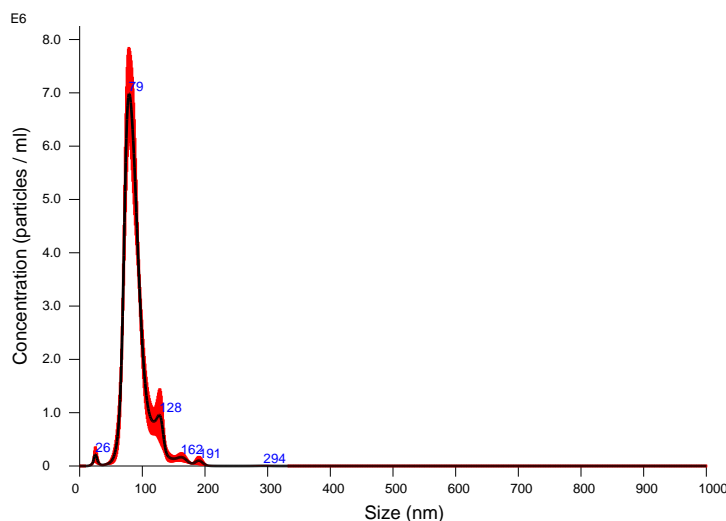

Averaged FTLA Concentration / Size for Experiment:  
STh5\_40x FD21 2023-06-14 12-55-32  
Error bars indicate + / - 1 standard error of the mean

### Included Files

STh5\_40x FD21 2023-06-14 12-55-51  
STh5\_40x FD21 2023-06-14 12-56-29  
STh5\_40x FD21 2023-06-14 12-57-10  
STh5\_40x FD21 2023-06-14 12-57-50  
STh5\_40x FD21 2023-06-14 12-58-30

### Details

NTA Version: NTA 3.4 Build 3.4.4  
Script Used: SOP Standard Measurement 12-55-32PM 14Jun2023.txt  
Time Captured: 12:55:32 14/06/2023  
Operator: LN  
Pre-treatment:  
Sample Name: STh5\_40x FD21  
Diluent:  
Remarks:

### Capture Settings

Camera Type: sCMOS  
Laser Type: Green  
Camera Level: 6  
Slider Shutter: 64  
Slider Gain: 5  
FPS: 25.0  
Number of Frames: 749  
Temperature: 25.3 °C  
Viscosity: (Water) 0.881 - 0.882 cP  
Dilution factor: Dilution not recorded

### Analysis Settings

Detect Threshold: 5  
Blur Size: Auto  
Max Jump Distance: Auto: 20.4 - 23.4 pix

### Results

#### Stats: Merged Data

Mean: 89.5 nm  
Mode: 79.0 nm  
SD: 22.2 nm  
D10: 70.4 nm  
D50: 84.6 nm  
D90: 118.5 nm

#### Stats: Mean +/- Standard Error

Mean: 89.4 +/- 1.1 nm  
Mode: 80.6 +/- 1.7 nm  
SD: 22.1 +/- 1.5 nm  
D10: 70.1 +/- 1.1 nm  
D50: 84.9 +/- 1.3 nm  
D90: 115.4 +/- 6.0 nm  
Concentration (Upgrade): 2.22e+08 +/- 1.05e+07 particles/ml  
35.3 +/- 1.6 particles/frame  
106.0 +/- 5.9 centres/frame

Concentration measurements may be unreliable  
See summary file for more info

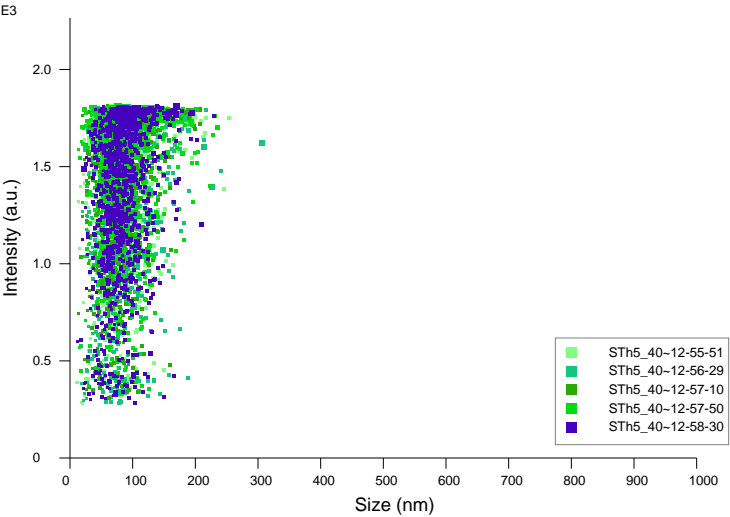

Intensity / Size graph for Experiment:  
STh5\_40x FD21 2023-06-14 12-55-32
