# Supplementary material for: Lyophilizing SERS biosensors to enable translation into an easy-to-use assay
Source: Royal Society of Chemistry journal article supplement (doi:10.1039/d4ay01667j), 2024-01-01
Supplement: d4ay01667j1.zip [file d4ay01667j1.zip]

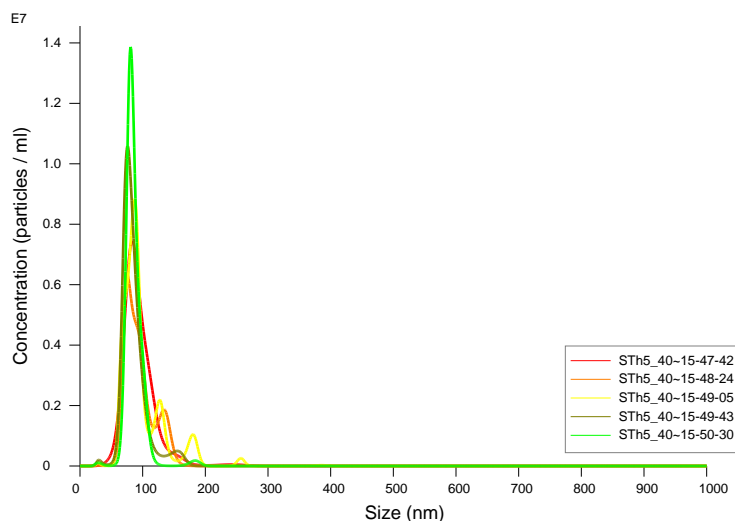

FTLA Concentration / Size graph for Experiment:  
STh5\_40x FD0 2023-05-24 15-47-27

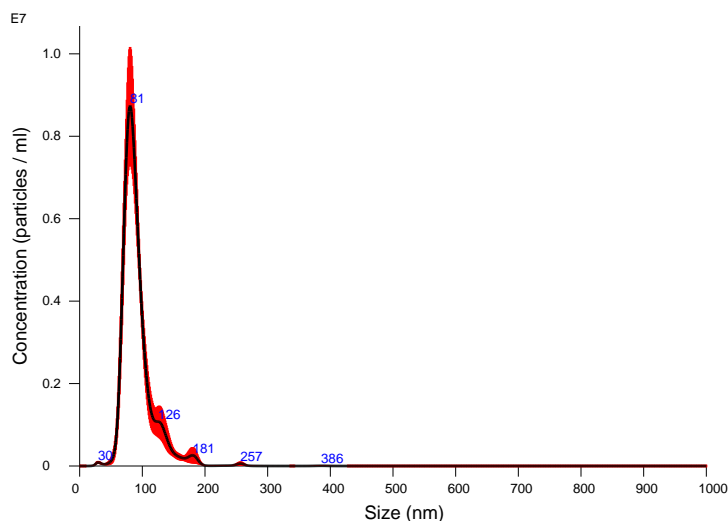

Averaged FTLA Concentration / Size for Experiment:  
STh5\_40x FD0 2023-05-24 15-47-27  
Error bars indicate + / - 1 standard error of the mean

### Included Files

STh5\_40x FD0 2023-05-24 15-47-27  
STh5\_40x FD0 2023-05-24 15-48-24  
STh5\_40x FD0 2023-05-24 15-49-05  
STh5\_40x FD0 2023-05-24 15-49-43  
STh5\_40x FD0 2023-05-24 15-50-30

### Details

NTA Version: NTA 3.4 Build 3.4.4  
Script Used: SOP Standard Measurement 03-47-27PM 24May2023.txt  
Time Captured: 15:47:27 24/05/2023  
Operator: LN  
Pre-treatment:  
Sample Name: STh5\_40x FD0  
Diluent:  
Remarks: Dilution from concentrated NPs+HITC

### Capture Settings

Camera Type: sCMOS  
Laser Type: Green  
Camera Level: 7  
Slider Shutter: 121  
Slider Gain: 24  
FPS: 25.0  
Number of Frames: 749  
Temperature: 26.0 - 26.0 °C  
Viscosity: (Water) 0.868 - 0.869 cP  
Dilution factor: Dilution not recorded

### Analysis Settings

Detect Threshold: 5  
Blur Size: Auto  
Max Jump Distance: Auto: 19.6 - 20.0 pix

### Results

#### Stats: Merged Data

Mean: 91.5 nm  
Mode: 80.5 nm  
SD: 26.0 nm  
D10: 69.2 nm  
D50: 85.5 nm  
D90: 123.1 nm

#### Stats: Mean +/- Standard Error

Mean: 91.5 +/- 2.4 nm  
Mode: 80.5 +/- 2.3 nm  
SD: 24.4 +/- 3.4 nm  
D10: 69.3 +/- 1.0 nm  
D50: 86.0 +/- 1.6 nm  
D90: 120.1 +/- 6.9 nm  
Concentration (Upgrade): 3.13e+08 +/- 1.16e+07 particles/ml  
47.7 +/- 1.5 particles/frame  
111.5 +/- 4.9 centres/frame

Concentration measurements may be unreliable  
See summary file for more info

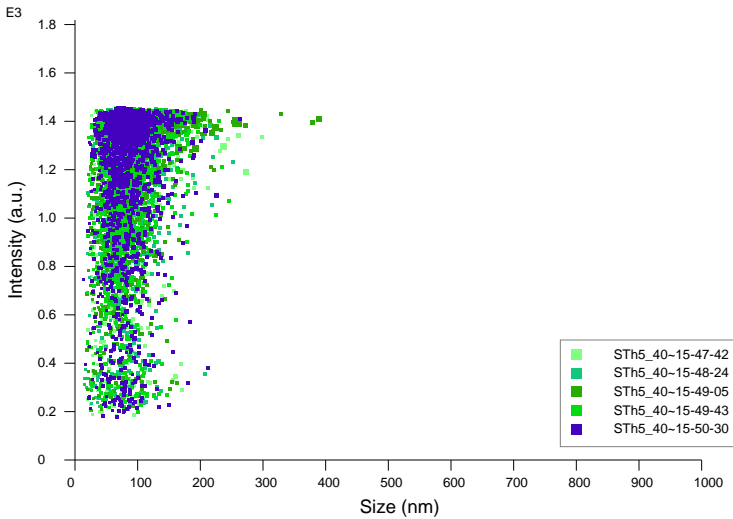

Intensity / Size graph for Experiment:  
STh5\_40x FD0 2023-05-24 15-47-27
