# Supplementary material for: Lyophilizing SERS biosensors to enable translation into an easy-to-use assay
Source: Royal Society of Chemistry journal article supplement (doi:10.1039/d4ay01667j), 2024-01-01
Supplement: d4ay01667j1.zip [file d4ay01667j1.zip]

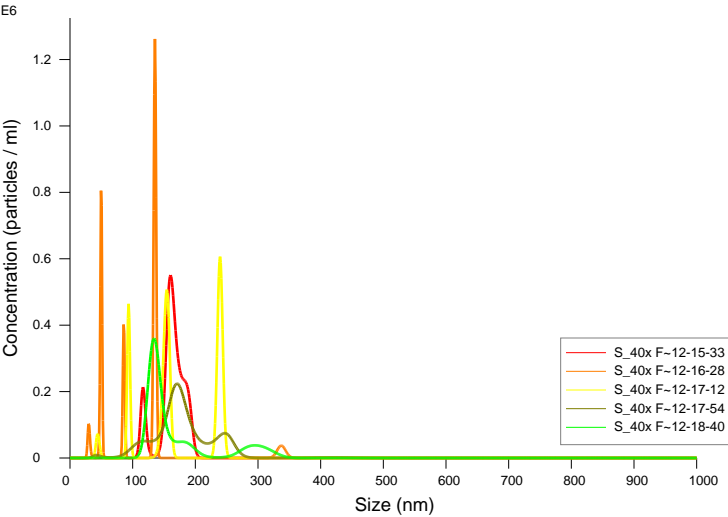

FTLA Concentration / Size graph for Experiment:  
S\_40x FD14 2023-06-07 12-15-13

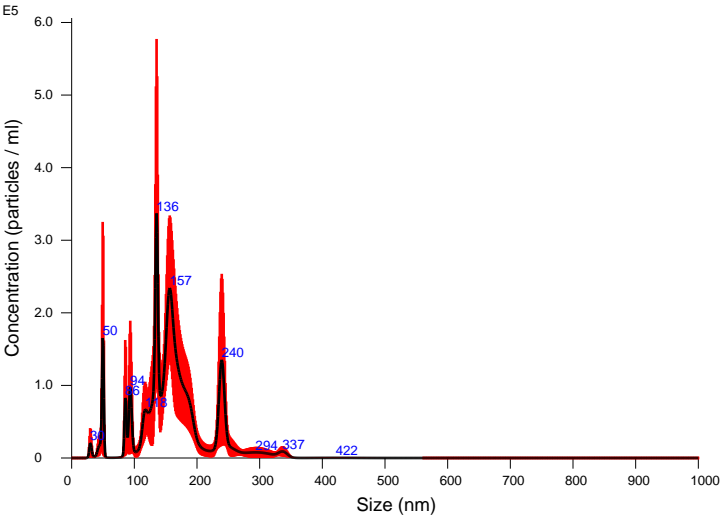

Averaged FTLA Concentration / Size for Experiment:  
S\_40x FD14 2023-06-07 12-15-13  
Error bars indicate + / - 1 standard error of the mean

|                                                                                                                                                                                                                                                                                                                                                                                                                                                                                                                                                                                                                                                                                                                                                                                                                                                                                                                                                                                                                                                                                           |                                                                                                                                                                                                                                                                                                                                                                                                                                                                                                                                                                                                                                                                                                                                                                        |
|-------------------------------------------------------------------------------------------------------------------------------------------------------------------------------------------------------------------------------------------------------------------------------------------------------------------------------------------------------------------------------------------------------------------------------------------------------------------------------------------------------------------------------------------------------------------------------------------------------------------------------------------------------------------------------------------------------------------------------------------------------------------------------------------------------------------------------------------------------------------------------------------------------------------------------------------------------------------------------------------------------------------------------------------------------------------------------------------|------------------------------------------------------------------------------------------------------------------------------------------------------------------------------------------------------------------------------------------------------------------------------------------------------------------------------------------------------------------------------------------------------------------------------------------------------------------------------------------------------------------------------------------------------------------------------------------------------------------------------------------------------------------------------------------------------------------------------------------------------------------------|
| <div><div>Included Files</div><div>S_40x FD14 2023-06-07 12-15-33<br/>S_40x FD14 2023-06-07 12-16-28<br/>S_40x FD14 2023-06-07 12-17-12<br/>S_40x FD14 2023-06-07 12-17-54<br/>S_40x FD14 2023-06-07 12-18-40</div><div><div>Details</div><div><div>NTA Version:NTA 3.4 Build 3.4.4</div><div>Script Used:SOP Standard Measurement 12-15-13PM 07Jun2023.txt</div><div>Time Captured:12:15:13 07/06/2023</div><div>Operator:LN</div><div>Pre-treatment:</div><div>Sample Name:S_40x FD14</div><div>Diluent:</div><div>Remarks:</div></div><div><div>Capture Settings</div><div><div>Camera Type:sCMOS</div><div>Laser Type:Green</div><div>Camera Level:7</div><div>Slider Shutter:121</div><div>Slider Gain:24</div><div>FPS25.0</div><div>Number of Frames:749</div><div>Temperature:25.6 - 25.6 °C</div><div>Viscosity:(Water) 0.876 - 0.877 cP</div><div>Dilution factor:Dilution not recorded</div></div><div><div>Analysis Settings</div><div><div>Detect Threshold:5</div><div>Blur Size:Auto</div><div>Max Jump Distance:Auto: 12.0 - 21.3 pix</div></div></div></div></div></div> | <div><div>Results</div><div><div>Stats: Merged Data</div><div><div>Mean:161.8 nm</div><div>Mode:135.6 nm</div><div>SD:56.0 nm</div><div>D10:94.1 nm</div><div>D50:156.5 nm</div><div>D90:240.3 nm</div></div><div><div>Stats: Mean +/- Standard Error</div><div><div>Mean:159.7 +/- 11.7 nm</div><div>Mode:168.1 +/- 19.2 nm</div><div>SD:50.7 +/- 7.9 nm</div><div>D10:101.7 +/- 14.4 nm</div><div>D50:154.2 +/- 7.4 nm</div><div>D90:220.5 +/- 26.2 nm</div></div><div><div>Concentration (Upgrade):</div><div>1.50e+07 +/- 9.94e+05 particles/ml</div><div>2.3 +/- 0.2 particles/frame</div><div>3.6 +/- 0.4 centres/frame</div></div><div><div>Concentration measurements may be unreliable</div><div>See summary file for more info</div></div></div></div></div> |
|-------------------------------------------------------------------------------------------------------------------------------------------------------------------------------------------------------------------------------------------------------------------------------------------------------------------------------------------------------------------------------------------------------------------------------------------------------------------------------------------------------------------------------------------------------------------------------------------------------------------------------------------------------------------------------------------------------------------------------------------------------------------------------------------------------------------------------------------------------------------------------------------------------------------------------------------------------------------------------------------------------------------------------------------------------------------------------------------|------------------------------------------------------------------------------------------------------------------------------------------------------------------------------------------------------------------------------------------------------------------------------------------------------------------------------------------------------------------------------------------------------------------------------------------------------------------------------------------------------------------------------------------------------------------------------------------------------------------------------------------------------------------------------------------------------------------------------------------------------------------------|

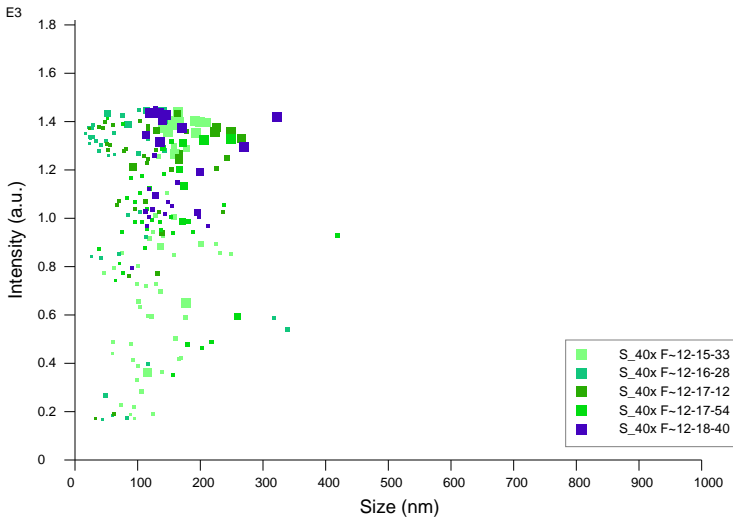

Intensity / Size graph for Experiment:  
S\_40x FD14 2023-06-07 12-15-13
