# Supplementary material for: Lyophilizing SERS biosensors to enable translation into an easy-to-use assay
Source: Royal Society of Chemistry journal article supplement (doi:10.1039/d4ay01667j), 2024-01-01
Supplement: d4ay01667j1.zip [file d4ay01667j1.zip]

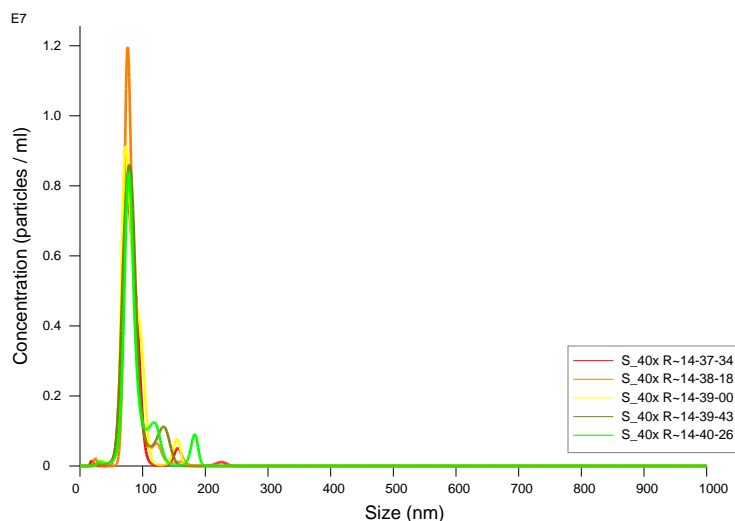

FTLA Concentration / Size graph for Experiment:  
S\_40x RT34 2023-06-21 14-37-03

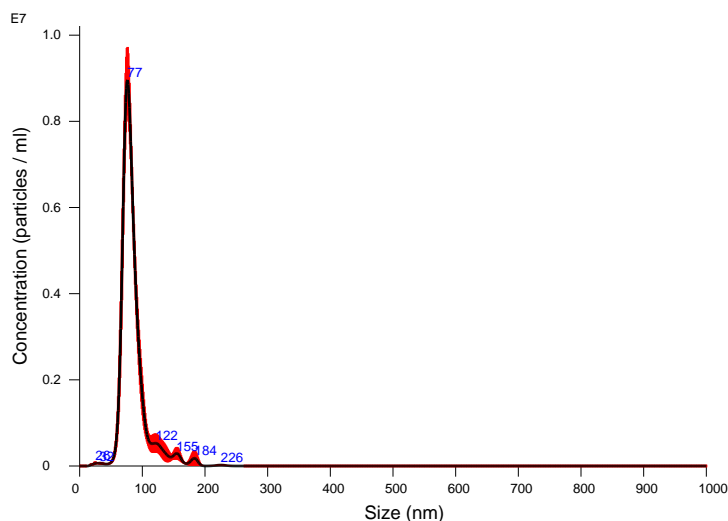

Averaged FTLA Concentration / Size for Experiment:  
S\_40x RT34 2023-06-21 14-37-03  
Error bars indicate + / - 1 standard error of the mean

### Included Files

S\_40x RT34 2023-06-21 14-37-34  
S\_40x RT34 2023-06-21 14-38-18  
S\_40x RT34 2023-06-21 14-39-00  
S\_40x RT34 2023-06-21 14-39-43  
S\_40x RT34 2023-06-21 14-40-26

### Details

NTA Version: NTA 3.4 Build 3.4.4  
Script Used: SOP Standard Measurement 02-37-03PM 21Jun2023.txt  
Time Captured: 14:37:03 21/06/2023  
Operator: LN  
Pre-treatment:  
Sample Name: S\_40x RT34  
Diluent:  
Remarks:

### Capture Settings

Camera Type: sCMOS  
Laser Type: Green  
Camera Level: 6  
Slider Shutter: 64  
Slider Gain: 5  
FPS: 25.0  
Number of Frames: 749  
Temperature: 24.5 °C  
Viscosity: (Water) 0.9 cP  
Dilution factor: Dilution not recorded

### Analysis Settings

Detect Threshold: 5  
Blur Size: Auto  
Max Jump Distance: Auto: 20.5 - 21.8 pix

### Results

#### Stats: Merged Data

Mean: 85.3 nm  
Mode: 76.2 nm  
SD: 22.1 nm  
D10: 67.7 nm  
D50: 80.0 nm  
D90: 108.1 nm

#### Stats: Mean +/- Standard Error

Mean: 85.4 +/- 1.5 nm  
Mode: 76.2 +/- 1.0 nm  
SD: 21.7 +/- 2.0 nm  
D10: 67.9 +/- 0.8 nm  
D50: 80.0 +/- 0.5 nm  
D90: 109.0 +/- 5.5 nm  
Concentration (Upgrade): 2.39e+08 +/- 9.54e+06 particles/ml  
39.0 +/- 1.5 particles/frame  
106.4 +/- 5.3 centres/frame

Concentration measurements may be unreliable  
See summary file for more info

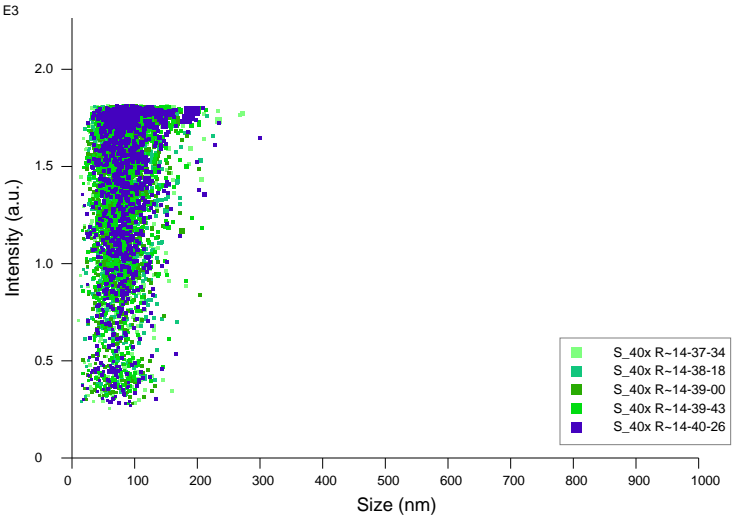

Intensity / Size graph for Experiment:  
S\_40x RT34 2023-06-21 14-37-03
