# Supplementary material for: Lyophilizing SERS biosensors to enable translation into an easy-to-use assay
Source: Royal Society of Chemistry journal article supplement (doi:10.1039/d4ay01667j), 2024-01-01
Supplement: d4ay01667j1.zip [file d4ay01667j1.zip]

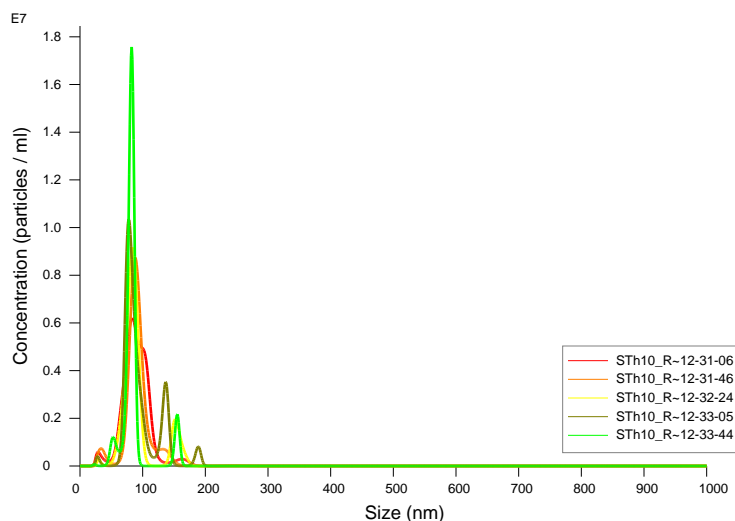

FTLA Concentration / Size graph for Experiment:  
STh10\_RT27 2023-06-14 12-30-50

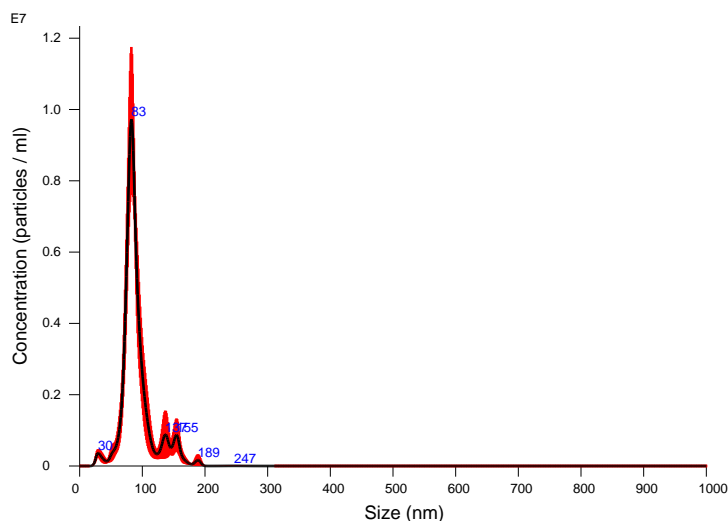

Averaged FTLA Concentration / Size for Experiment:  
STh10\_RT27 2023-06-14 12-30-50  
Error bars indicate + / - 1 standard error of the mean

### Included Files

STh10\_RT27 2023-06-14 12-31-06  
STh10\_RT27 2023-06-14 12-31-46  
STh10\_RT27 2023-06-14 12-32-24  
STh10\_RT27 2023-06-14 12-33-05  
STh10\_RT27 2023-06-14 12-33-44

### Details

NTA Version: NTA 3.4 Build 3.4.4  
Script Used: SOP Standard Measurement 12-30-50PM 14Jun2023.txt  
Time Captured: 12:30:50 14/06/2023  
Operator: LN  
Pre-treatment:  
Sample Name: STh10\_40x RT27  
Diluent:  
Remarks:

### Capture Settings

Camera Type: sCMOS  
Laser Type: Green  
Camera Level: 6  
Slider Shutter: 64  
Slider Gain: 5  
FPS: 25.0  
Number of Frames: 749  
Temperature: 24.9 - 24.9 °C  
Viscosity: (Water) 0.890 - 0.891 cP  
Dilution factor: Dilution not recorded

### Analysis Settings

Detect Threshold: 5  
Blur Size: Auto  
Max Jump Distance: Auto: 19.8 - 21.7 pix

### Results

#### Stats: Merged Data

Mean: 90.9 nm  
Mode: 82.6 nm  
SD: 25.2 nm  
D10: 70.4 nm  
D50: 85.2 nm  
D90: 130.5 nm

#### Stats: Mean +/- Standard Error

Mean: 90.8 +/- 1.5 nm  
Mode: 83.2 +/- 1.6 nm  
SD: 24.8 +/- 1.4 nm  
D10: 70.6 +/- 1.4 nm  
D50: 85.9 +/- 1.4 nm  
D90: 121.1 +/- 10.4 nm  
Concentration (Upgrade): 2.63e+08 +/- 8.40e+06 particles/ml  
41.3 +/- 1.0 particles/frame  
137.3 +/- 10.2 centres/frame

Concentration measurements may be unreliable  
See summary file for more info

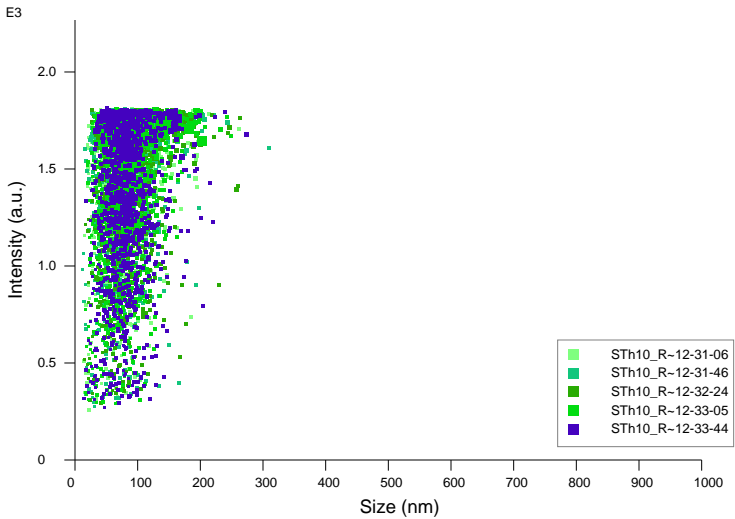

Intensity / Size graph for Experiment:  
STh10\_RT27 2023-06-14 12-30-50
