# Supplementary material for: Lyophilizing SERS biosensors to enable translation into an easy-to-use assay
Source: Royal Society of Chemistry journal article supplement (doi:10.1039/d4ay01667j), 2024-01-01
Supplement: d4ay01667j1.zip [file d4ay01667j1.zip]

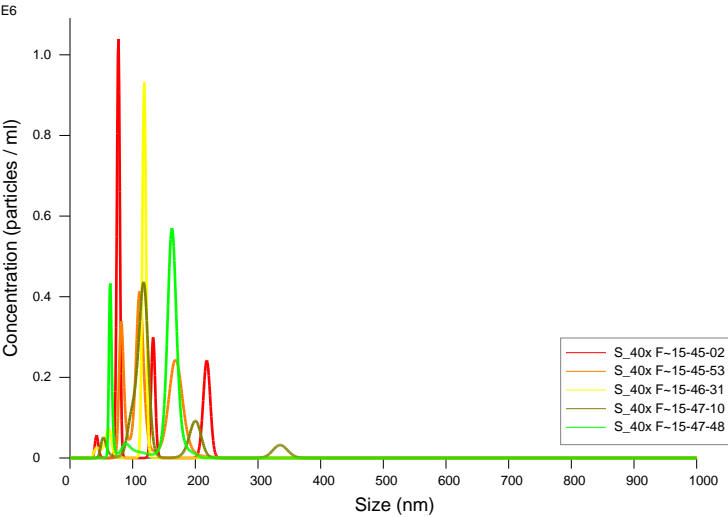

FTLA Concentration / Size graph for Experiment:  
S\_40x FD28 2023-06-21 15-44-48

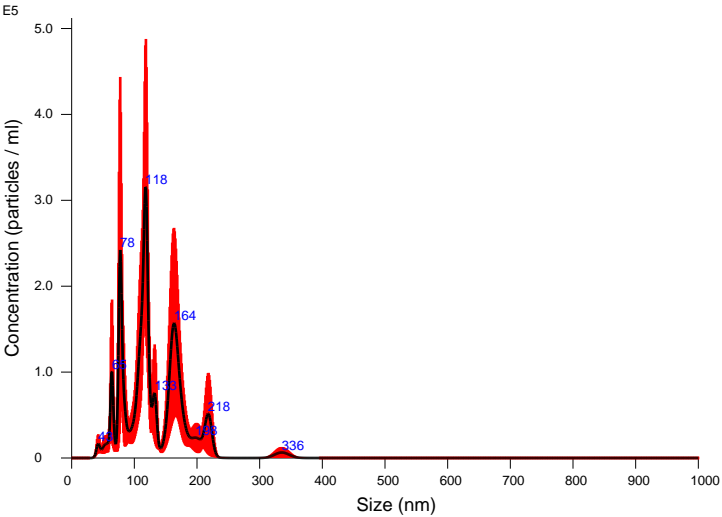

Averaged FTLA Concentration / Size for Experiment:  
S\_40x FD28 2023-06-21 15-44-48  
Error bars indicate + / - 1 standard error of the mean

|                                                                                                                                                                                                                                                                                                                                                                                                                                                                                                                                                                                                                                                                                                                                                                                                                                                                                                                                                                                                                                                                                         |                                                                                                                                                                                                                                                                                                                                                                                                                                                                                                                                                                                                                                                                                                                                                                      |
|-----------------------------------------------------------------------------------------------------------------------------------------------------------------------------------------------------------------------------------------------------------------------------------------------------------------------------------------------------------------------------------------------------------------------------------------------------------------------------------------------------------------------------------------------------------------------------------------------------------------------------------------------------------------------------------------------------------------------------------------------------------------------------------------------------------------------------------------------------------------------------------------------------------------------------------------------------------------------------------------------------------------------------------------------------------------------------------------|----------------------------------------------------------------------------------------------------------------------------------------------------------------------------------------------------------------------------------------------------------------------------------------------------------------------------------------------------------------------------------------------------------------------------------------------------------------------------------------------------------------------------------------------------------------------------------------------------------------------------------------------------------------------------------------------------------------------------------------------------------------------|
| <div><div>Included Files</div><div>S_40x FD28 2023-06-21 15-45-02<br/>S_40x FD28 2023-06-21 15-45-53<br/>S_40x FD28 2023-06-21 15-46-31<br/>S_40x FD28 2023-06-21 15-47-10<br/>S_40x FD28 2023-06-21 15-47-48</div><div><div>Details</div><div><div>NTA Version:NTA 3.4 Build 3.4.4</div><div>Script Used:SOP Standard Measurement 03-44-48PM 21Jun2023.txt</div><div>Time Captured:15:44:48 21/06/2023</div><div>Operator:LN</div><div>Pre-treatment:</div><div>Sample Name:S_40x FD28</div><div>Diluent:</div><div>Remarks:</div></div><div><div>Capture Settings</div><div><div>Camera Type:sCMOS</div><div>Laser Type:Green</div><div>Camera Level:6</div><div>Slider Shutter:64</div><div>Slider Gain:5</div><div>FPS25.0</div><div>Number of Frames:749</div><div>Temperature:25.8 - 25.8 °C</div><div>Viscosity:(Water) 0.872 - 0.873 cP</div><div>Dilution factor:Dilution not recorded</div></div><div><div>Analysis Settings</div><div><div>Detect Threshold:5</div><div>Blur Size:Auto</div><div>Max Jump Distance:Auto: 14.9 - 22.3 pix</div></div></div></div></div></div> | <div><div>Results</div><div><div>Stats: Merged Data</div><div><div>Mean:131.2 nm</div><div>Mode:118.0 nm</div><div>SD:49.2 nm</div><div>D10:75.8 nm</div><div>D50:119.9 nm</div><div>D90:191.5 nm</div></div><div><div>Stats: Mean +/- Standard Error</div><div><div>Mean:129.2 +/- 5.9 nm</div><div>Mode:117.4 +/- 13.6 nm</div><div>SD:44.8 +/- 7.8 nm</div><div>D10:76.1 +/- 6.3 nm</div><div>D50:118.6 +/- 12.5 nm</div><div>D90:179.9 +/- 17.0 nm</div></div><div><div>Concentration (Upgrade):</div><div>1.32e+07 +/- 1.47e+06 particles/ml</div><div>2.1 +/- 0.3 particles/frame</div><div>2.8 +/- 0.5 centres/frame</div></div><div><div>Concentration measurements may be unreliable</div><div>See summary file for more info</div></div></div></div></div> |
|-----------------------------------------------------------------------------------------------------------------------------------------------------------------------------------------------------------------------------------------------------------------------------------------------------------------------------------------------------------------------------------------------------------------------------------------------------------------------------------------------------------------------------------------------------------------------------------------------------------------------------------------------------------------------------------------------------------------------------------------------------------------------------------------------------------------------------------------------------------------------------------------------------------------------------------------------------------------------------------------------------------------------------------------------------------------------------------------|----------------------------------------------------------------------------------------------------------------------------------------------------------------------------------------------------------------------------------------------------------------------------------------------------------------------------------------------------------------------------------------------------------------------------------------------------------------------------------------------------------------------------------------------------------------------------------------------------------------------------------------------------------------------------------------------------------------------------------------------------------------------|

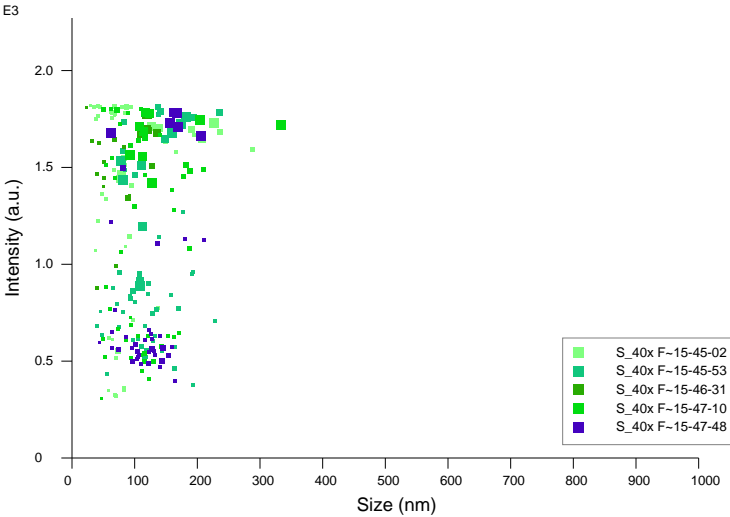

Intensity / Size graph for Experiment:  
S\_40x FD28 2023-06-21 15-44-48
