# Supplementary material for: Lyophilizing SERS biosensors to enable translation into an easy-to-use assay
Source: Royal Society of Chemistry journal article supplement (doi:10.1039/d4ay01667j), 2024-01-01
Supplement: d4ay01667j1.zip [file d4ay01667j1.zip]

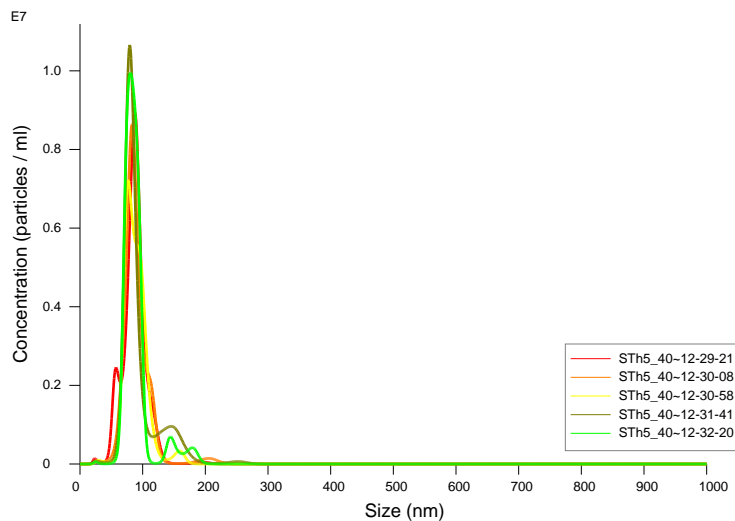

FTLA Concentration / Size graph for Experiment:  
STh5\_40x RT13 2023-05-31 12-29-05

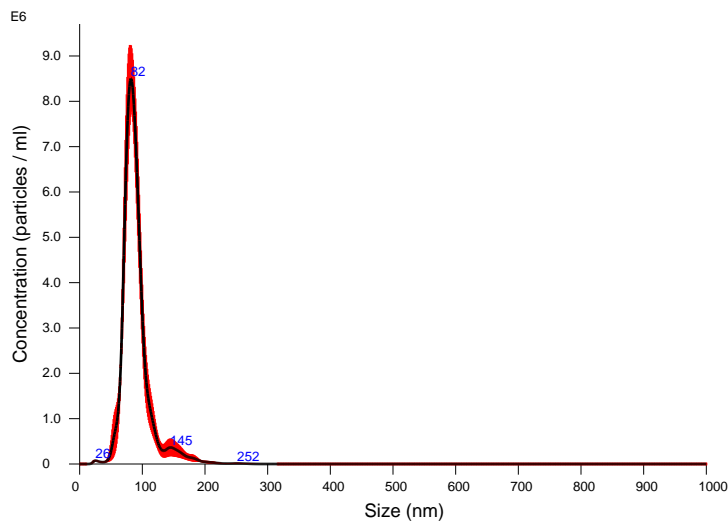

Averaged FTLA Concentration / Size for Experiment:  
STh5\_40x RT13 2023-05-31 12-29-05  
Error bars indicate + / - 1 standard error of the mean

### Included Files

STh5\_40x RT13 2023-05-31 12-29-21  
STh5\_40x RT13 2023-05-31 12-30-08  
STh5\_40x RT13 2023-05-31 12-30-58  
STh5\_40x RT13 2023-05-31 12-31-41  
STh5\_40x RT13 2023-05-31 12-32-20

### Details

NTA Version: NTA 3.4 Build 3.4.4  
Script Used: SOP Standard Measurement 12-29-05PM 31May2023.txt  
Time Captured: 12:29:05 31/05/2023  
Operator: LN  
Pre-treatment:  
Sample Name: STh5\_40x RT13  
Diluent:  
Remarks:

### Capture Settings

Camera Type: sCMOS  
Laser Type: Green  
Camera Level: 7  
Slider Shutter: 121  
Slider Gain: 24  
FPS: 25.0  
Number of Frames: 749  
Temperature: 24.7 - 24.7 °C  
Viscosity: (Water) 0.894 - 0.896 cP  
Dilution factor: Dilution not recorded

### Analysis Settings

Detect Threshold: 5  
Blur Size: Auto  
Max Jump Distance: Auto: 19.1 - 21.2 pix

### Results

#### Stats: Merged Data

Mean: 89.6 nm  
Mode: 81.9 nm  
SD: 23.5 nm  
D10: 69.4 nm  
D50: 85.1 nm  
D90: 112.7 nm

#### Stats: Mean +/- Standard Error

Mean: 89.5 +/- 1.1 nm  
Mode: 81.5 +/- 1.8 nm  
SD: 22.9 +/- 2.1 nm  
D10: 68.5 +/- 1.8 nm  
D50: 85.3 +/- 0.7 nm  
D90: 114.4 +/- 6.7 nm  
Concentration (Upgrade): 2.83e+08 +/- 7.70e+06 particles/ml  
44.6 +/- 1.0 particles/frame  
97.4 +/- 6.0 centres/frame

Concentration measurements may be unreliable  
See summary file for more info

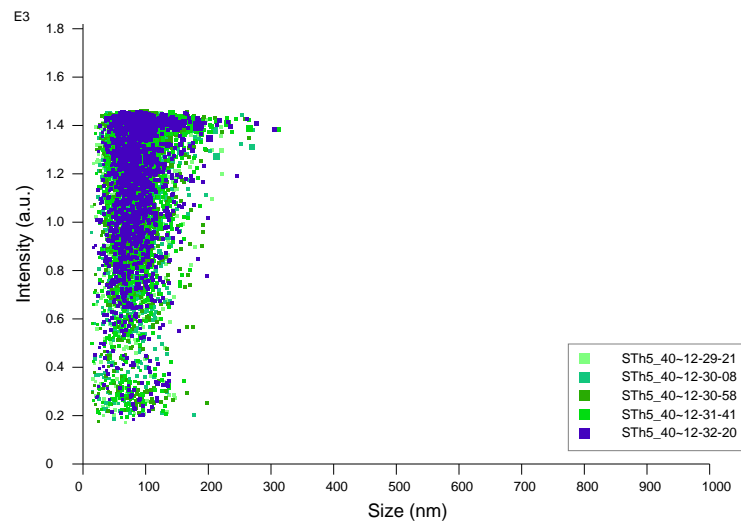

Intensity / Size graph for Experiment:  
STh5\_40x RT13 2023-05-31 12-29-05
