# Supplementary material for: Lyophilizing SERS biosensors to enable translation into an easy-to-use assay
Source: Royal Society of Chemistry journal article supplement (doi:10.1039/d4ay01667j), 2024-01-01
Supplement: d4ay01667j1.zip [file d4ay01667j1.zip]

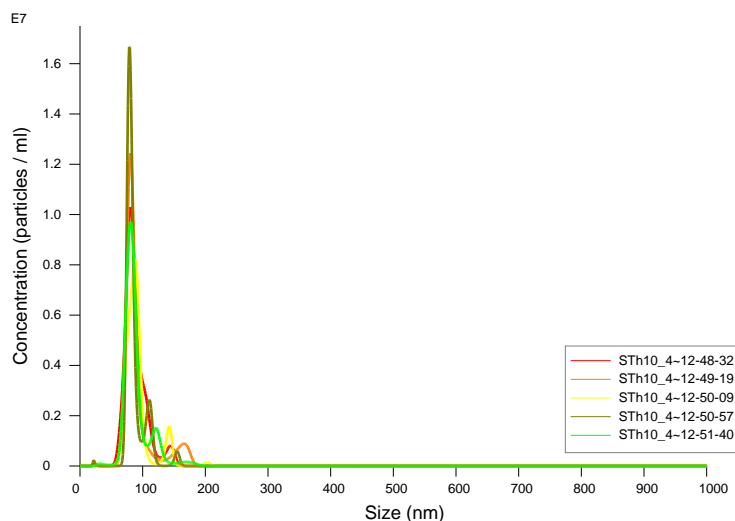

FTLA Concentration / Size graph for Experiment:  
STh10\_40x FD7 2023-05-31 12-48-11

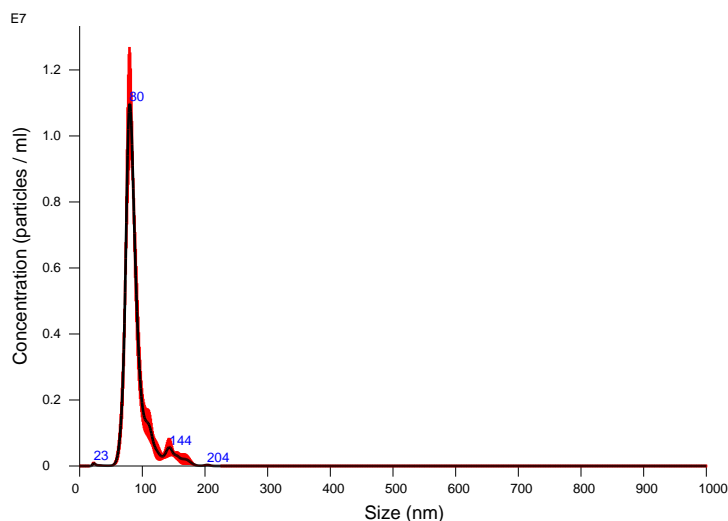

Averaged FTLA Concentration / Size for Experiment:  
STh10\_40x FD7 2023-05-31 12-48-11  
Error bars indicate + / - 1 standard error of the mean

### Included Files

STh10\_40x FD7 2023-05-31 12-48-32  
STh10\_40x FD7 2023-05-31 12-49-19  
STh10\_40x FD7 2023-05-31 12-50-09  
STh10\_40x FD7 2023-05-31 12-50-57  
STh10\_40x FD7 2023-05-31 12-51-40

### Details

NTA Version: NTA 3.4 Build 3.4.4  
Script Used: SOP Standard Measurement 12-48-11PM 31May2023.txt  
Time Captured: 12:48:11 31/05/2023  
Operator: LN  
Pre-treatment:  
Sample Name: STh10\_40x FD7  
Diluent:  
Remarks:

### Capture Settings

Camera Type: sCMOS  
Laser Type: Green  
Camera Level: 7  
Slider Shutter: 121  
Slider Gain: 24  
FPS: 25.0  
Number of Frames: 749  
Temperature: 25.1 - 25.2 °C  
Viscosity: (Water) 0.884 - 0.886 cP  
Dilution factor: Dilution not recorded

### Analysis Settings

Detect Threshold: 5  
Blur Size: Auto  
Max Jump Distance: Auto: 19.2 - 20.3 pix

### Results

#### Stats: Merged Data

Mean: 89.2 nm  
Mode: 80.0 nm  
SD: 20.8 nm  
D10: 72.6 nm  
D50: 83.4 nm  
D90: 113.5 nm

#### Stats: Mean +/- Standard Error

Mean: 89.2 +/- 0.9 nm  
Mode: 81.8 +/- 1.6 nm  
SD: 20.5 +/- 1.6 nm  
D10: 72.5 +/- 0.6 nm  
D50: 83.7 +/- 0.9 nm  
D90: 119.6 +/- 4.6 nm  
Concentration (Upgrade): 2.54e+08 +/- 1.13e+07 particles/ml  
40.1 +/- 1.3 particles/frame  
85.5 +/- 4.0 centres/frame

Concentration measurements may be unreliable  
See summary file for more info

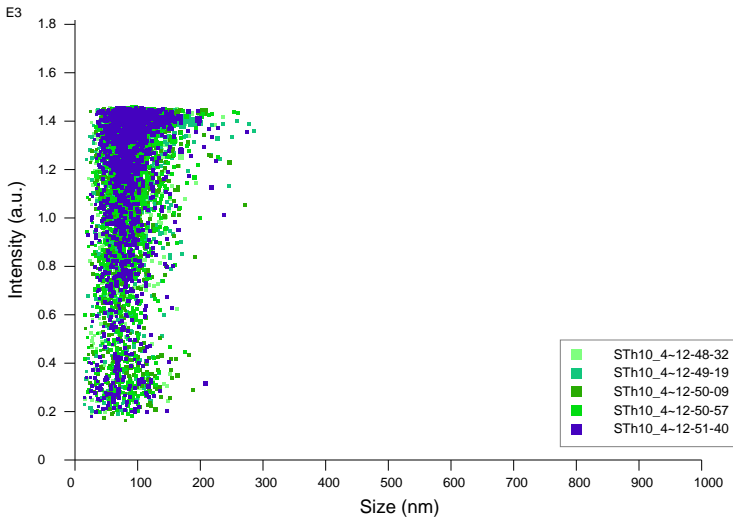

Intensity / Size graph for Experiment:  
STh10\_40x FD7 2023-05-31 12-48-11
