# Supplementary material for: Lyophilizing SERS biosensors to enable translation into an easy-to-use assay
Source: Royal Society of Chemistry journal article supplement (doi:10.1039/d4ay01667j), 2024-01-01
Supplement: d4ay01667j1.zip [file d4ay01667j1.zip]

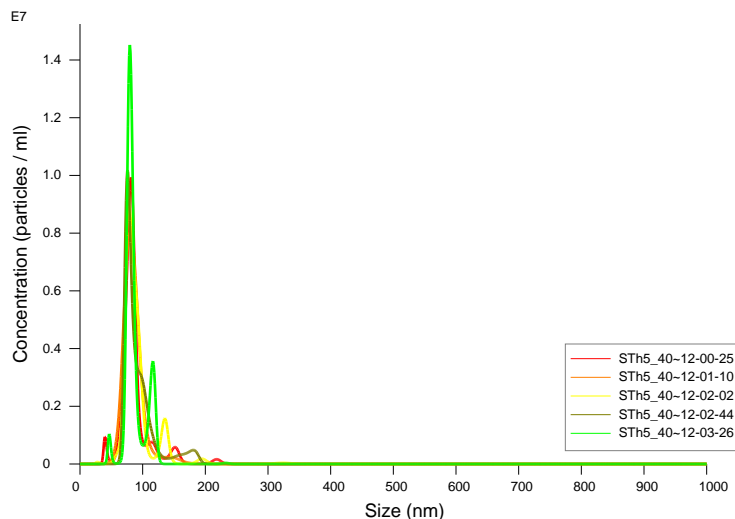

FTLA Concentration / Size graph for Experiment:  
STh5\_40x FD14 2023-06-07 12-00-12

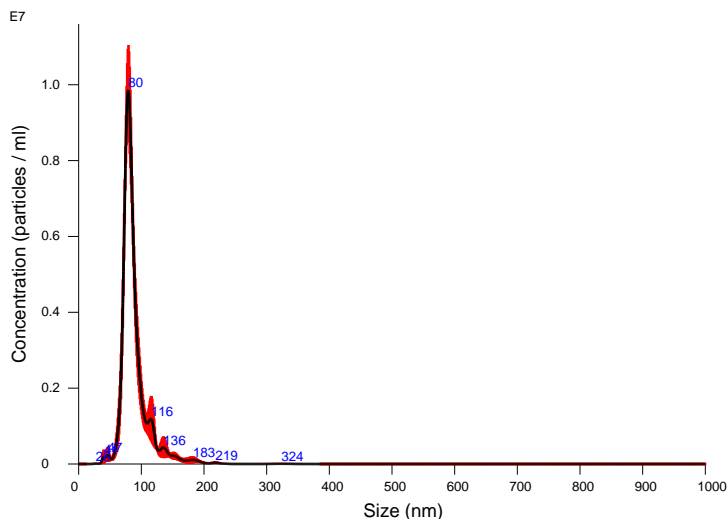

Averaged FTLA Concentration / Size for Experiment:  
STh5\_40x FD14 2023-06-07 12-00-12  
Error bars indicate + / - 1 standard error of the mean

### Included Files

STh5\_40x FD14 2023-06-07 12-00-25  
STh5\_40x FD14 2023-06-07 12-01-10  
STh5\_40x FD14 2023-06-07 12-02-02  
STh5\_40x FD14 2023-06-07 12-02-44  
STh5\_40x FD14 2023-06-07 12-03-26

### Details

NTA Version: NTA 3.4 Build 3.4.4  
Script Used: SOP Standard Measurement 12-00-12PM 07Jun2023.txt  
Time Captured: 12:00:12 07/06/2023  
Operator: LN  
Pre-treatment:  
Sample Name: STh5\_40x FD14  
Diluent:  
Remarks:

### Capture Settings

Camera Type: sCMOS  
Laser Type: Green  
Camera Level: 7  
Slider Shutter: 121  
Slider Gain: 24  
FPS: 25.0  
Number of Frames: 749  
Temperature: 25.3 - 25.4 °C  
Viscosity: (Water) 0.880 - 0.882 cP  
Dilution factor: Dilution not recorded

### Analysis Settings

Detect Threshold: 5  
Blur Size: Auto  
Max Jump Distance: Auto: 19.7 - 20.2 pix

### Results

#### Stats: Merged Data

Mean: 88.4 nm  
Mode: 79.1 nm  
SD: 23.6 nm  
D10: 70.7 nm  
D50: 82.4 nm  
D90: 114.5 nm

#### Stats: Mean +/- Standard Error

Mean: 88.4 +/- 1.4 nm  
Mode: 79.1 +/- 1.0 nm  
SD: 23.0 +/- 2.2 nm  
D10: 70.5 +/- 1.3 nm  
D50: 82.6 +/- 0.4 nm  
D90: 116.2 +/- 4.2 nm  
Concentration (Upgrade): 2.43e+08 +/- 3.34e+06 particles/ml  
38.7 +/- 0.5 particles/frame  
73.7 +/- 2.5 centres/frame

Concentration measurements may be unreliable  
See summary file for more info

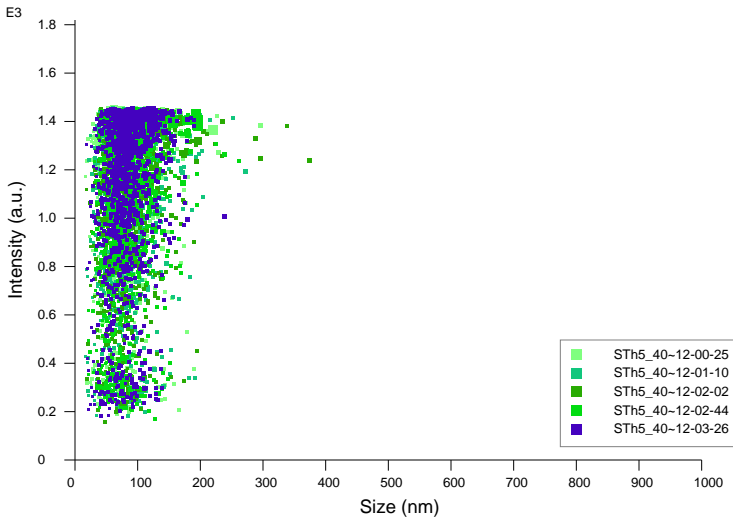

Intensity / Size graph for Experiment:  
STh5\_40x FD14 2023-06-07 12-00-12
