# Supplementary material for: Lyophilizing SERS biosensors to enable translation into an easy-to-use assay
Source: Royal Society of Chemistry journal article supplement (doi:10.1039/d4ay01667j), 2024-01-01
Supplement: d4ay01667j1.zip [file d4ay01667j1.zip]

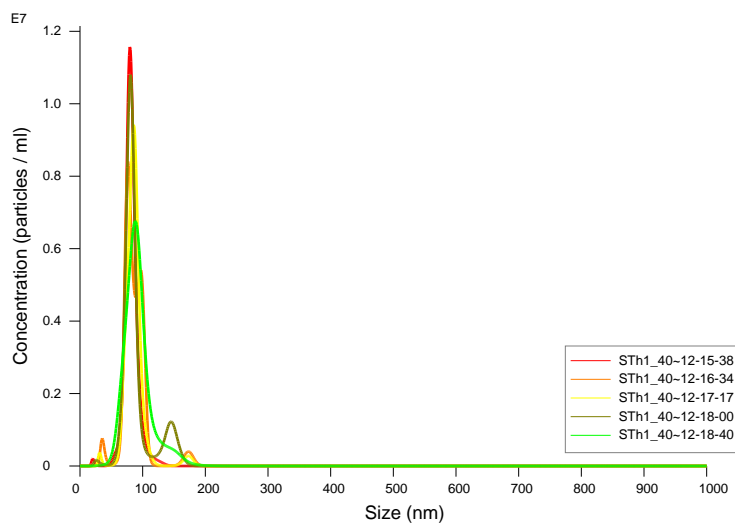

FTLA Concentration / Size graph for Experiment:  
STh1\_40x RT27 2023-06-14 12-15-20

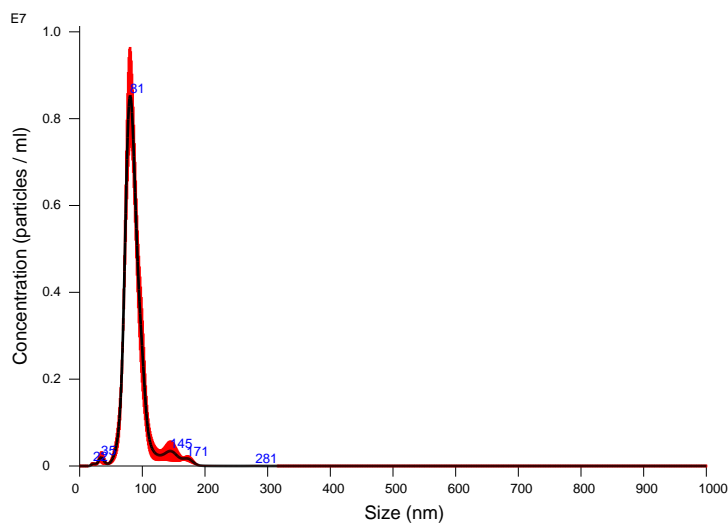

Averaged FTLA Concentration / Size for Experiment:  
STh1\_40x RT27 2023-06-14 12-15-20  
Error bars indicate + / - 1 standard error of the mean

### Included Files

STh1\_40x RT27 2023-06-14 12-15-38  
STh1\_40x RT27 2023-06-14 12-16-34  
STh1\_40x RT27 2023-06-14 12-17-17  
STh1\_40x RT27 2023-06-14 12-18-00  
STh1\_40x RT27 2023-06-14 12-18-40

### Details

NTA Version: NTA 3.4 Build 3.4.4  
Script Used: SOP Standard Measurement 12-15-20PM 14Jun2023.txt  
Time Captured: 12:15:20 14/06/2023  
Operator: LN  
Pre-treatment:  
Sample Name: STh1\_40x RT27  
Diluent:  
Remarks:

### Capture Settings

Camera Type: sCMOS  
Laser Type: Green  
Camera Level: 6  
Slider Shutter: 64  
Slider Gain: 5  
FPS: 25.0  
Number of Frames: 749  
Temperature: 24.5 - 24.6 °C  
Viscosity: (Water) 0.896 - 0.898 cP  
Dilution factor: Dilution not recorded

### Analysis Settings

Detect Threshold: 5  
Blur Size: Auto  
Max Jump Distance: Auto: 20.0 - 21.2 pix

### Results

#### Stats: Merged Data

Mean: 87.5 nm  
Mode: 80.6 nm  
SD: 20.6 nm  
D10: 70.4 nm  
D50: 83.7 nm  
D90: 106.0 nm

#### Stats: Mean +/- Standard Error

Mean: 87.3 +/- 1.7 nm  
Mode: 82.2 +/- 2.1 nm  
SD: 19.6 +/- 2.2 nm  
D10: 70.3 +/- 0.6 nm  
D50: 84.2 +/- 1.4 nm  
D90: 110.6 +/- 8.1 nm  
Concentration (Upgrade): 2.38e+08 +/- 9.00e+06 particles/ml  
38.9 +/- 1.2 particles/frame  
107.8 +/- 5.4 centres/frame

Concentration measurements may be unreliable  
See summary file for more info

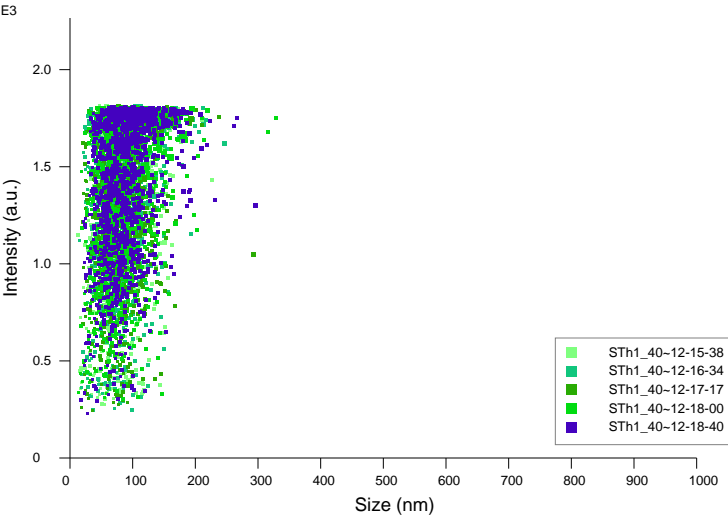

Intensity / Size graph for Experiment:  
STh1\_40x RT27 2023-06-14 12-15-20
