# Supplementary material for: Lyophilizing SERS biosensors to enable translation into an easy-to-use assay
Source: Royal Society of Chemistry journal article supplement (doi:10.1039/d4ay01667j), 2024-01-01
Supplement: d4ay01667j1.zip [file d4ay01667j1.zip]

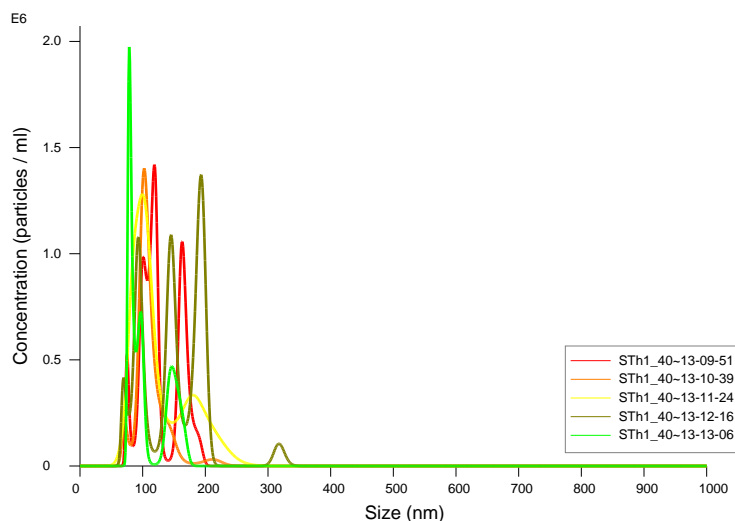

FTLA Concentration / Size graph for Experiment:  
STh1\_40x FD7 2023-05-31 13-09-19

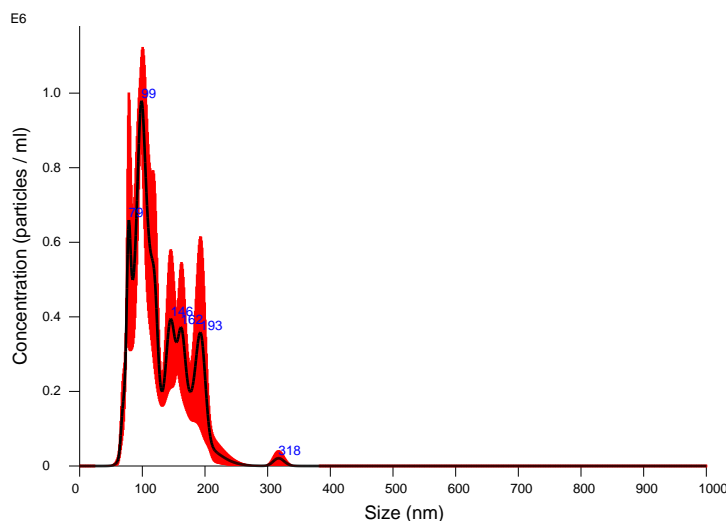

Averaged FTLA Concentration / Size for Experiment:  
STh1\_40x FD7 2023-05-31 13-09-19  
Error bars indicate + / - 1 standard error of the mean

### Included Files

STh1\_40x FD7 2023-05-31 13-09-51  
STh1\_40x FD7 2023-05-31 13-10-39  
STh1\_40x FD7 2023-05-31 13-11-24  
STh1\_40x FD7 2023-05-31 13-12-16  
STh1\_40x FD7 2023-05-31 13-13-06

### Details

NTA Version: NTA 3.4 Build 3.4.4  
Script Used: SOP Standard Measurement 01-09-19PM 31May2023.txt  
Time Captured: 13:09:19 31/05/2023  
Operator: LN  
Pre-treatment:  
Sample Name: STh5\_40x FD7  
Diluent:  
Remarks:

### Capture Settings

Camera Type: sCMOS  
Laser Type: Green  
Camera Level: 7  
Slider Shutter: 121  
Slider Gain: 24  
FPS: 25.0  
Number of Frames: 749  
Temperature: 25.6 °C  
Viscosity: (Water) 0.875 - 0.876 cP  
Dilution factor: Dilution not recorded

### Analysis Settings

Detect Threshold: 5  
Blur Size: Auto  
Max Jump Distance: Auto: 15.0 - 19.1 pix

### Results

#### Stats: Merged Data

Mean: 128.2 nm  
Mode: 98.7 nm  
SD: 43.2 nm  
D10: 81.4 nm  
D50: 115.0 nm  
D90: 190.6 nm

#### Stats: Mean +/- Standard Error

Mean: 124.6 +/- 7.6 nm  
Mode: 118.6 +/- 19.7 nm  
SD: 36.8 +/- 4.9 nm  
D10: 86.2 +/- 3.0 nm  
D50: 115.4 +/- 9.4 nm  
D90: 172.5 +/- 11.4 nm  
Concentration (Upgrade): 6.03e+07 +/- 8.42e+06 particles/ml  
9.8 +/- 1.4 particles/frame  
14.6 +/- 2.3 centres/frame

Concentration measurements may be unreliable  
See summary file for more info

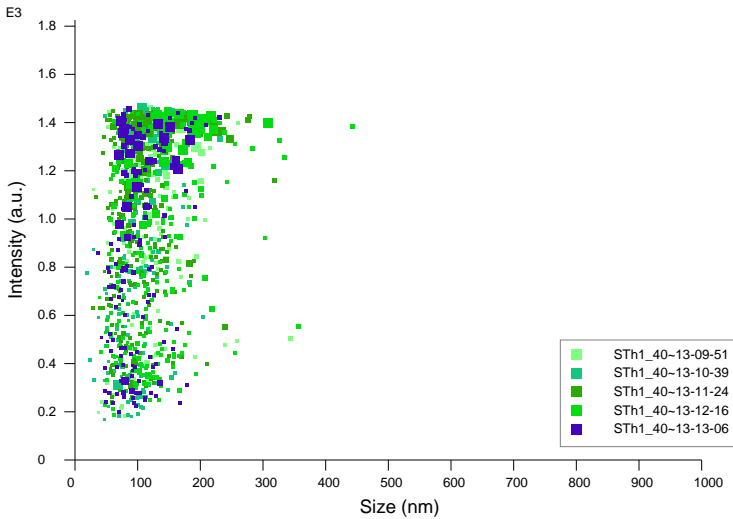

Intensity / Size graph for Experiment:  
STh1\_40x FD7 2023-05-31 13-09-19
