# Supplementary material for: Lyophilizing SERS biosensors to enable translation into an easy-to-use assay
Source: Royal Society of Chemistry journal article supplement (doi:10.1039/d4ay01667j), 2024-01-01
Supplement: d4ay01667j1.zip [file d4ay01667j1.zip]

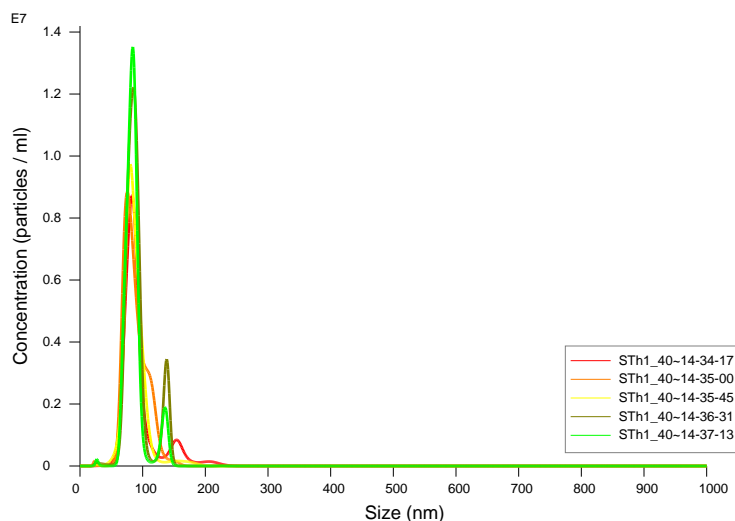

FTLA Concentration / Size graph for Experiment:  
STh1\_40x RT6 2023-05-24 14-33-59

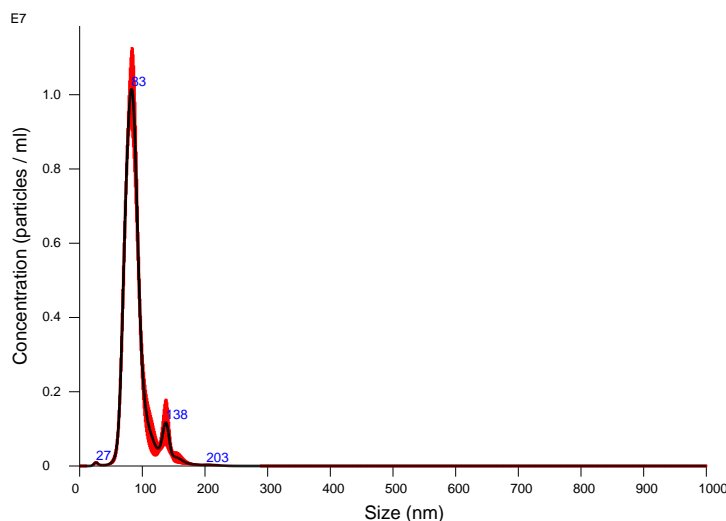

Averaged FTLA Concentration / Size for Experiment:  
STh1\_40x RT6 2023-05-24 14-33-59  
Error bars indicate + / - 1 standard error of the mean

### Included Files

STh1\_40x RT6 2023-05-24 14-34-17  
STh1\_40x RT6 2023-05-24 14-35-00  
STh1\_40x RT6 2023-05-24 14-35-45  
STh1\_40x RT6 2023-05-24 14-36-31  
STh1\_40x RT6 2023-05-24 14-37-13

### Details

NTA Version: NTA 3.4 Build 3.4.4  
Script Used: SOP Standard Measurement 02-33-59PM 24May2023.txt  
Time Captured: 14:33:59 24/05/2023  
Operator: LN  
Pre-treatment:  
Sample Name: STh1\_40x RT6  
Diluent:  
Remarks: Dilution from concentrated NPs+HITC

### Capture Settings

Camera Type: sCMOS  
Laser Type: Green  
Camera Level: 7  
Slider Shutter: 121  
Slider Gain: 24  
FPS: 25.0  
Number of Frames: 749  
Temperature: 25.2 - 25.2 °C  
Viscosity: (Water) 0.884 - 0.886 cP  
Dilution factor: Dilution not recorded

### Analysis Settings

Detect Threshold: 5  
Blur Size: Auto  
Max Jump Distance: Auto: 19.7 - 20.6 pix

### Results

#### Stats: Merged Data

Mean: 89.0 nm  
Mode: 82.8 nm  
SD: 21.1 nm  
D10: 70.3 nm  
D50: 84.5 nm  
D90: 114.7 nm

#### Stats: Mean +/- Standard Error

Mean: 89.0 +/- 1.3 nm  
Mode: 81.7 +/- 1.7 nm  
SD: 20.8 +/- 2.2 nm  
D10: 70.4 +/- 0.7 nm  
D50: 84.4 +/- 0.5 nm  
D90: 118.6 +/- 8.0 nm  
Concentration (Upgrade): 3.04e+08 +/- 1.31e+07 particles/ml  
48.2 +/- 2.1 particles/frame  
111.6 +/- 7.2 centres/frame

Concentration measurements may be unreliable  
See summary file for more info

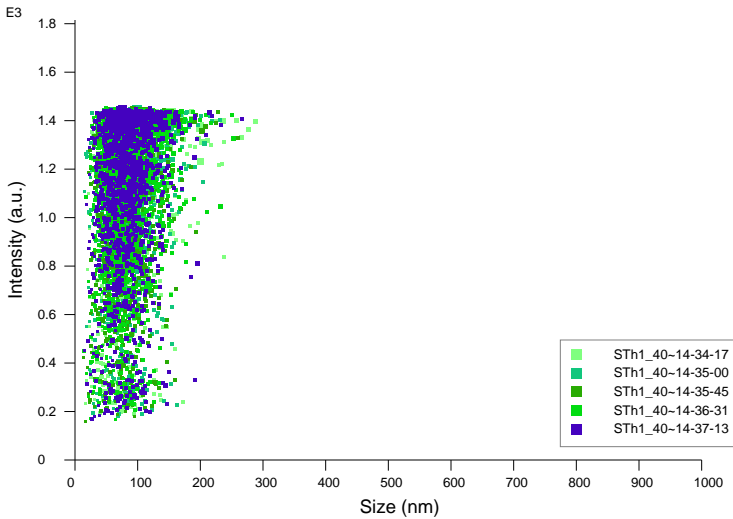

Intensity / Size graph for Experiment:  
STh1\_40x RT6 2023-05-24 14-33-59
