# Supplementary material for: Lyophilizing SERS biosensors to enable translation into an easy-to-use assay
Source: Royal Society of Chemistry journal article supplement (doi:10.1039/d4ay01667j), 2024-01-01
Supplement: d4ay01667j1.zip [file d4ay01667j1.zip]

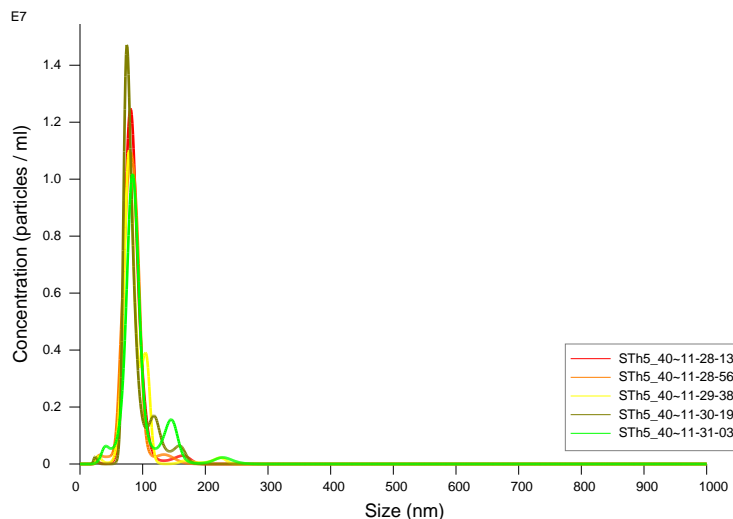

FTLA Concentration / Size graph for Experiment:  
STh5\_40x RT20 2023-06-07 11-27-45

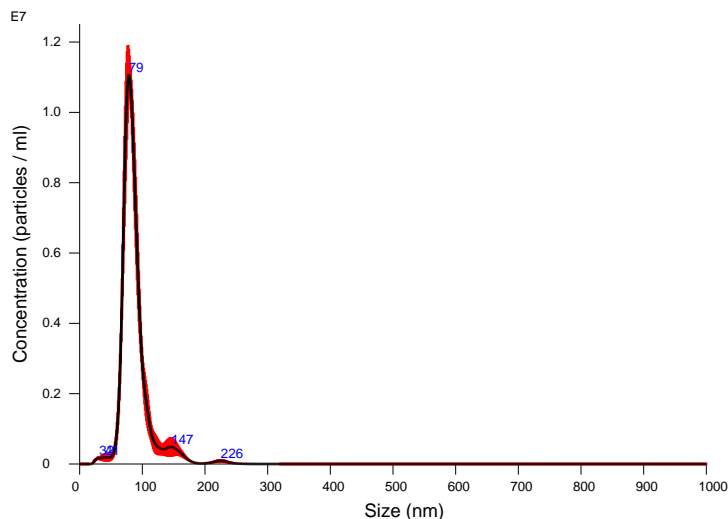

Averaged FTLA Concentration / Size for Experiment:  
STh5\_40x RT20 2023-06-07 11-27-45  
Error bars indicate + / - 1 standard error of the mean

### Included Files

STh5\_40x RT20 2023-06-07 11-28-13  
STh5\_40x RT20 2023-06-07 11-28-56  
STh5\_40x RT20 2023-06-07 11-29-38  
STh5\_40x RT20 2023-06-07 11-30-19  
STh5\_40x RT20 2023-06-07 11-31-03

### Details

NTA Version: NTA 3.4 Build 3.4.4  
Script Used: SOP Standard Measurement 11-27-45AM 07Jun2023.txt  
Time Captured: 11:27:45 07/06/2023  
Operator: LN  
Pre-treatment:  
Sample Name: STh5\_40x RT20  
Diluent:  
Remarks:

### Capture Settings

Camera Type: sCMOS  
Laser Type: Green  
Camera Level: 7  
Slider Shutter: 121  
Slider Gain: 24  
FPS: 25.0  
Number of Frames: 749  
Temperature: 24.6 - 24.7 °C  
Viscosity: (Water) 0.894 - 0.896 cP  
Dilution factor: Dilution not recorded

### Analysis Settings

Detect Threshold: 5  
Blur Size: Auto  
Max Jump Distance: Auto: 19.7 - 20.0 pix

### Results

#### Stats: Merged Data

Mean: 87.6 nm  
Mode: 78.7 nm  
SD: 24.3 nm  
D10: 68.5 nm  
D50: 82.4 nm  
D90: 110.4 nm

#### Stats: Mean +/- Standard Error

Mean: 87.6 +/- 2.1 nm  
Mode: 79.8 +/- 1.5 nm  
SD: 23.3 +/- 3.1 nm  
D10: 68.4 +/- 0.7 nm  
D50: 82.5 +/- 1.1 nm  
D90: 114.3 +/- 8.3 nm  
Concentration (Upgrade): 3.33e+08 +/- 6.11e+06 particles/ml  
51.8 +/- 0.8 particles/frame  
130.0 +/- 4.0 centres/frame

Concentration measurements may be unreliable  
See summary file for more info

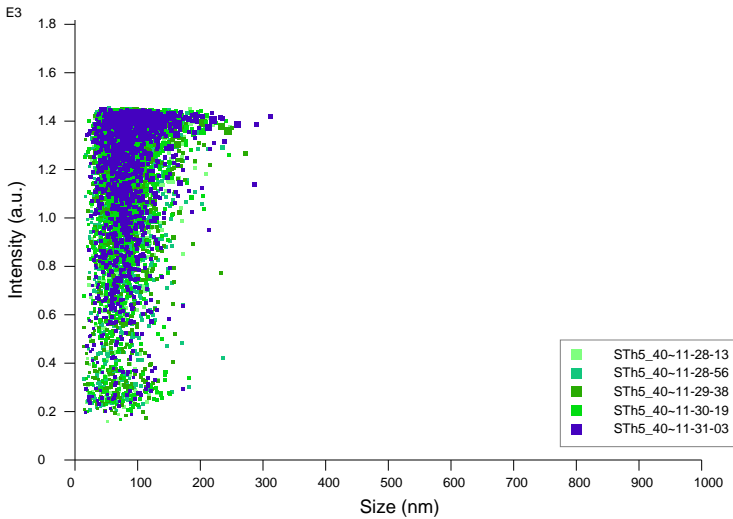

Intensity / Size graph for Experiment:  
STh5\_40x RT20 2023-06-07 11-27-45
