# Supplementary material for: Lyophilizing SERS biosensors to enable translation into an easy-to-use assay
Source: Royal Society of Chemistry journal article supplement (doi:10.1039/d4ay01667j), 2024-01-01
Supplement: d4ay01667j1.zip [file d4ay01667j1.zip]

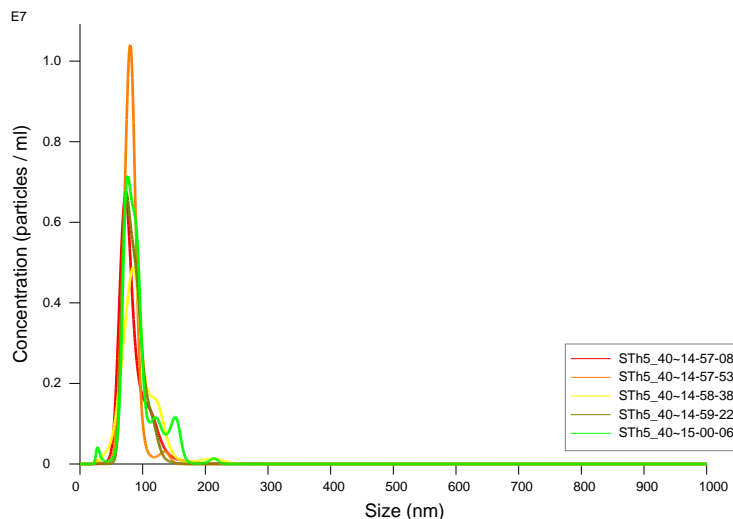

FTLA Concentration / Size graph for Experiment:  
STh5\_40x RT34 2023-06-21 14-56-52

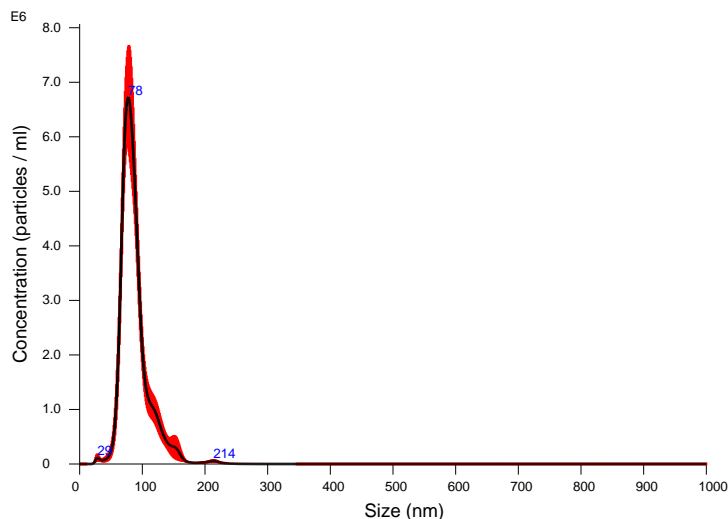

Averaged FTLA Concentration / Size for Experiment:  
STh5\_40x RT34 2023-06-21 14-56-52  
Error bars indicate + / - 1 standard error of the mean

### Included Files

STh5\_40x RT34 2023-06-21 14-57-08  
STh5\_40x RT34 2023-06-21 14-57-53  
STh5\_40x RT34 2023-06-21 14-58-38  
STh5\_40x RT34 2023-06-21 14-59-22  
STh5\_40x RT34 2023-06-21 15-00-06

### Details

NTA Version: NTA 3.4 Build 3.4.4  
Script Used: SOP Standard Measurement 02-56-52PM 21Jun2023.txt  
Time Captured: 14:56:52 21/06/2023  
Operator: LN  
Pre-treatment:  
Sample Name: STh5\_40x RT34  
Diluent:  
Remarks:

### Capture Settings

Camera Type: sCMOS  
Laser Type: Green  
Camera Level: 6  
Slider Shutter: 64  
Slider Gain: 5  
FPS: 25.0  
Number of Frames: 749  
Temperature: 24.8 - 24.9 °C  
Viscosity: (Water) 0.891 - 0.892 cP  
Dilution factor: Dilution not recorded

### Analysis Settings

Detect Threshold: 5  
Blur Size: Auto  
Max Jump Distance: Auto: 20.0 - 21.5 pix

### Results

#### Stats: Merged Data

Mean: 87.7 nm  
Mode: 77.5 nm  
SD: 23.9 nm  
D10: 66.0 nm  
D50: 82.5 nm  
D90: 118.1 nm

#### Stats: Mean +/- Standard Error

Mean: 87.6 +/- 2.6 nm  
Mode: 77.5 +/- 2.3 nm  
SD: 22.4 +/- 3.2 nm  
D10: 66.0 +/- 1.2 nm  
D50: 82.9 +/- 1.9 nm  
D90: 116.8 +/- 7.7 nm  
Concentration (Upgrade): 2.46e+08 +/- 9.31e+06 particles/ml  
39.1 +/- 1.5 particles/frame  
108.3 +/- 7.9 centres/frame

Concentration measurements may be unreliable  
See summary file for more info

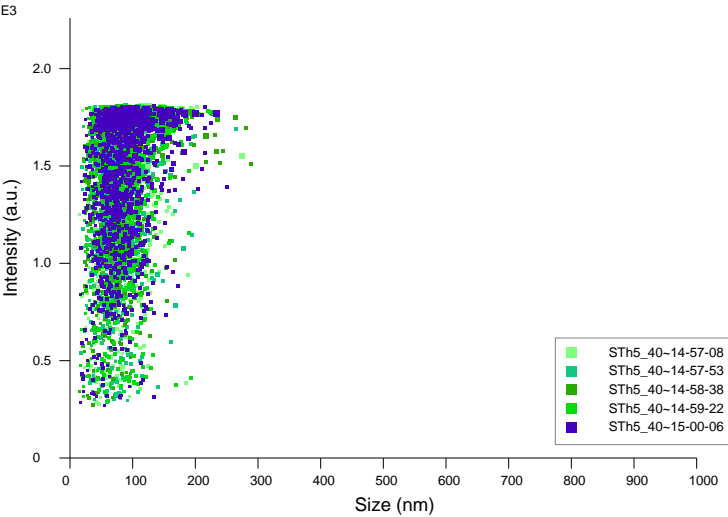

Intensity / Size graph for Experiment:  
STh5\_40x RT34 2023-06-21 14-56-52
