# Supplementary material for: Lyophilizing SERS biosensors to enable translation into an easy-to-use assay
Source: Royal Society of Chemistry journal article supplement (doi:10.1039/d4ay01667j), 2024-01-01
Supplement: d4ay01667j1.zip [file d4ay01667j1.zip]

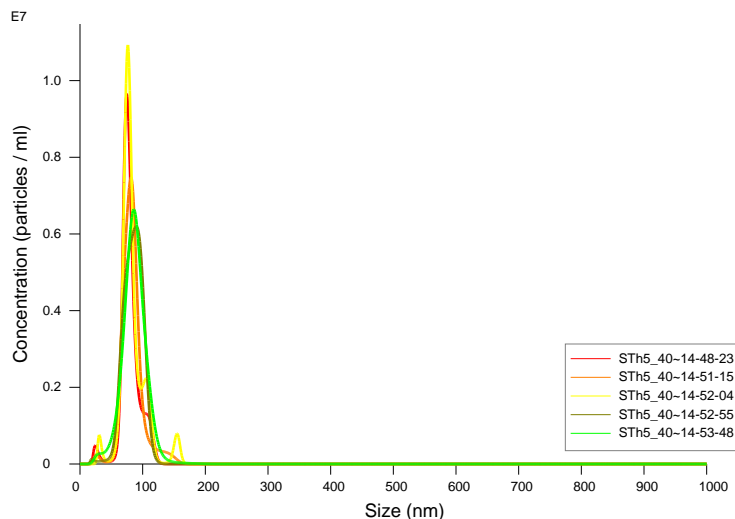

FTLA Concentration / Size graph for Experiment:  
STh5\_40x RT41 2023-06-28 14-47-56

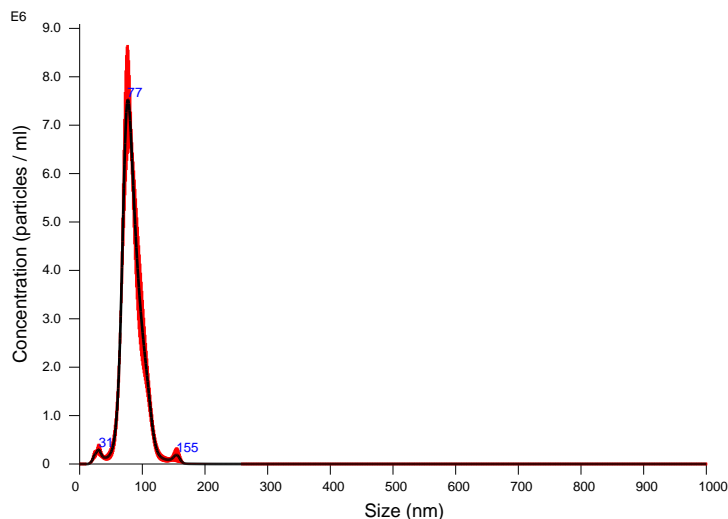

Averaged FTLA Concentration / Size for Experiment:  
STh5\_40x RT41 2023-06-28 14-47-56  
Error bars indicate + / - 1 standard error of the mean

### Included Files

STh5\_40x RT41 2023-06-28 14-48-23  
STh5\_40x RT41 2023-06-28 14-51-15  
STh5\_40x RT41 2023-06-28 14-52-04  
STh5\_40x RT41 2023-06-28 14-52-55  
STh5\_40x RT41 2023-06-28 14-53-48

### Details

NTA Version: NTA 3.4 Build 3.4.4  
Script Used: SOP Standard Measurement 02-47-56PM 28Jun2023.txt  
Time Captured: 14:47:56 28/06/2023  
Operator: LN  
Pre-treatment:  
Sample Name: STh5\_40x RT41  
Diluent:  
Remarks:

### Capture Settings

Camera Type: sCMOS  
Laser Type: Green  
Camera Level: 6  
Slider Shutter: 64  
Slider Gain: 5  
FPS: 25.0  
Number of Frames: 749  
Temperature: 24.7 - 24.8 °C  
Viscosity: (Water) 0.892 - 0.894 cP  
Dilution factor: Dilution not recorded

### Analysis Settings

Detect Threshold: 5  
Blur Size: Auto  
Max Jump Distance: Auto: 20.7 - 23.4 pix

### Results

#### Stats: Merged Data

Mean: 83.6 nm  
Mode: 77.0 nm  
SD: 18.1 nm  
D10: 66.1 nm  
D50: 81.5 nm  
D90: 105.4 nm

#### Stats: Mean +/- Standard Error

Mean: 83.5 +/- 1.1 nm  
Mode: 81.6 +/- 2.8 nm  
SD: 17.7 +/- 1.1 nm  
D10: 65.9 +/- 0.6 nm  
D50: 81.9 +/- 1.7 nm  
D90: 104.7 +/- 1.6 nm  
Concentration (Upgrade): 2.44e+08 +/- 1.01e+07 particles/ml  
39.4 +/- 1.4 particles/frame  
129.3 +/- 8.6 centres/frame

Concentration measurements may be unreliable  
See summary file for more info

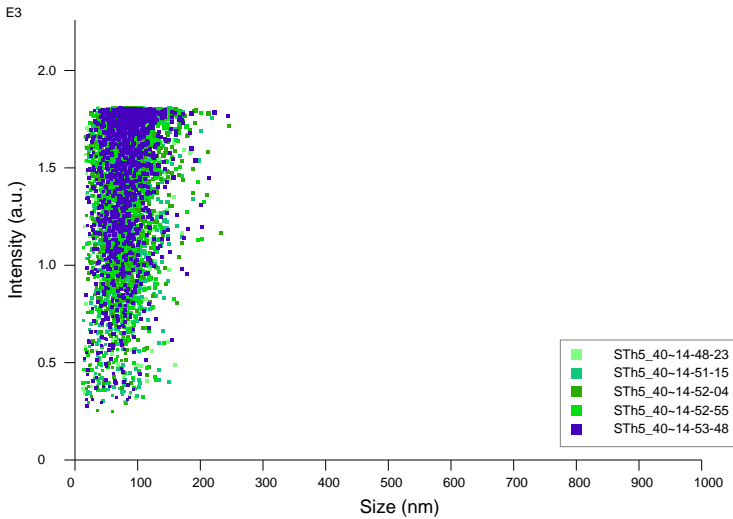

Intensity / Size graph for Experiment:  
STh5\_40x RT41 2023-06-28 14-47-56
