# Supplementary material for: Lyophilizing SERS biosensors to enable translation into an easy-to-use assay
Source: Royal Society of Chemistry journal article supplement (doi:10.1039/d4ay01667j), 2024-01-01
Supplement: d4ay01667j1.zip [file d4ay01667j1.zip]

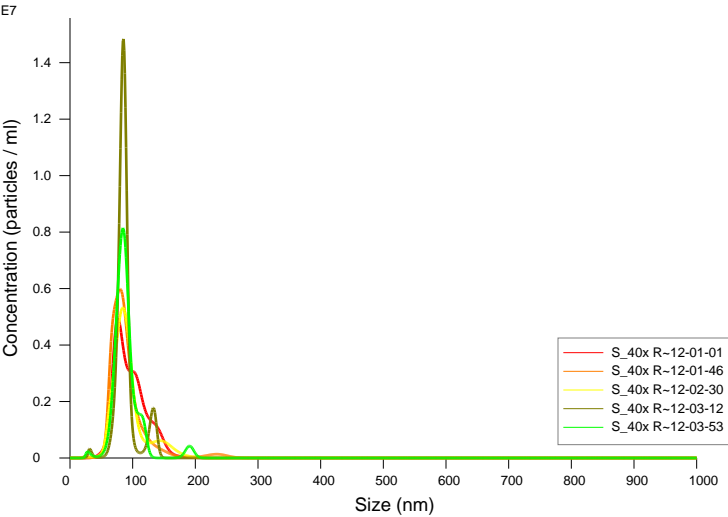

FTLA Concentration / Size graph for Experiment:  
S\_40x RT0 2023-05-18 12-00-26

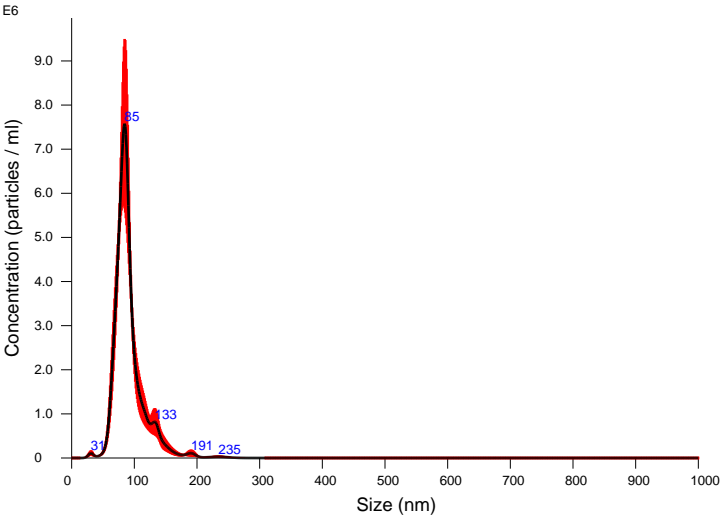

Averaged FTLA Concentration / Size for Experiment:  
S\_40x RT0 2023-05-18 12-00-26  
Error bars indicate + / - 1 standard error of the mean

**Included Files**

S\_40x RT0 2023-05-18 12-01-01  
S\_40x RT0 2023-05-18 12-01-46  
S\_40x RT0 2023-05-18 12-02-30  
S\_40x RT0 2023-05-18 12-03-12  
S\_40x RT0 2023-05-18 12-03-53

**Details**

NTA Version: NTA 3.4 Build 3.4.4  
Script Used: SOP Standard Measurement 12-00-26PM 18May2023.txt  
Time Captured: 12:00:26 18/05/2023  
Operator: LN  
Pre-treatment:  
Sample Name: S\_40x RT0  
Diluent:  
Remarks:

**Capture Settings**

Camera Type: sCMOS  
Laser Type: Green  
Camera Level: 6  
Slider Shutter: 64  
Slider Gain: 5  
FPS: 25.0  
Number of Frames: 749  
Temperature: 23.6 °C  
Viscosity: (Water) 0.917 - 0.918 cP  
Dilution factor: Dilution not recorded

**Analysis Settings**

Detect Threshold: 5  
Blur Size: Auto  
Max Jump Distance: Auto: 19.1 - 20.1 pix

**Results**

Stats: Merged Data

Mean: 91.4 nm  
Mode: 84.5 nm  
SD: 24.8 nm  
D10: 69.0 nm  
D50: 86.0 nm  
D90: 122.8 nm

Stats: Mean +/- Standard Error

Mean: 91.5 +/- 1.4 nm  
Mode: 82.1 +/- 1.7 nm  
SD: 24.4 +/- 2.3 nm  
D10: 69.4 +/- 1.6 nm  
D50: 86.6 +/- 1.3 nm  
D90: 122.4 +/- 4.9 nm  
Concentration (Upgrade): 2.43e+08 +/- 8.93e+06 particles/ml  
40.2 +/- 1.5 particles/frame  
112.0 +/- 4.6 centres/frame

Concentration measurements may be unreliable  
See summary file for more info

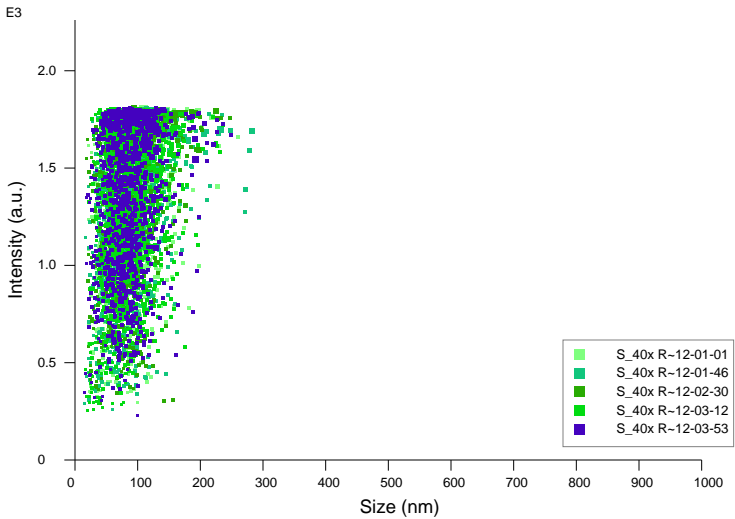

Intensity / Size graph for Experiment:  
S\_40x RT0 2023-05-18 12-00-26
