# Supplementary material for: Lyophilizing SERS biosensors to enable translation into an easy-to-use assay
Source: Royal Society of Chemistry journal article supplement (doi:10.1039/d4ay01667j), 2024-01-01
Supplement: d4ay01667j1.zip [file d4ay01667j1.zip]

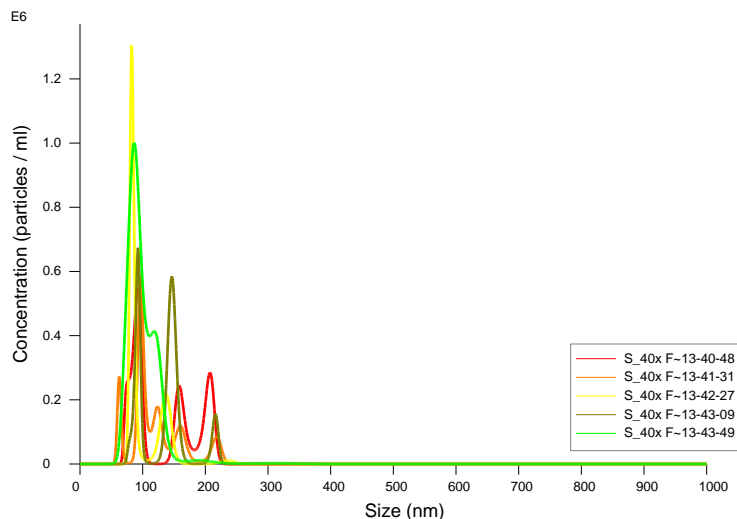

FTLA Concentration / Size graph for Experiment:  
S\_40x FD7 2023-05-31 13-40-12

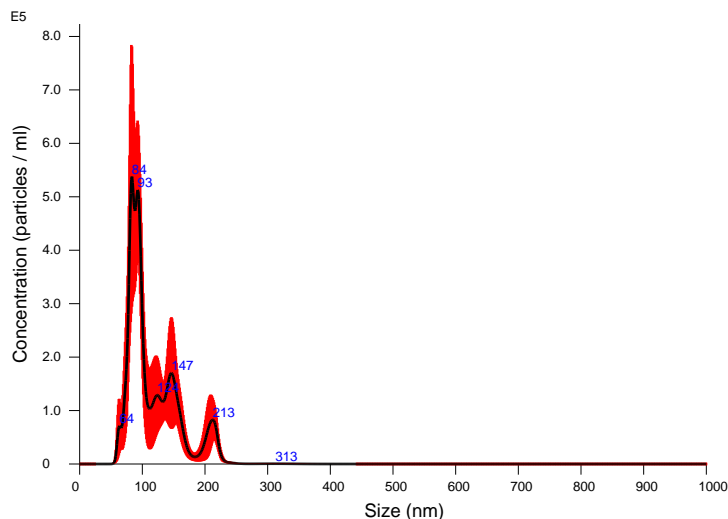

Averaged FTLA Concentration / Size for Experiment:  
S\_40x FD7 2023-05-31 13-40-12  
Error bars indicate + / - 1 standard error of the mean

### Included Files

S\_40x FD7 2023-05-31 13-40-12  
S\_40x FD7 2023-05-31 13-41-31  
S\_40x FD7 2023-05-31 13-42-27  
S\_40x FD7 2023-05-31 13-43-09  
S\_40x FD7 2023-05-31 13-43-49

### Details

NTA Version: NTA 3.4 Build 3.4.4  
Script Used: SOP Standard Measurement 01-40-12PM 31May2023.txt  
Time Captured: 13:40:12 31/05/2023  
Operator: LN  
Pre-treatment:  
Sample Name: S\_40x FD7  
Diluent:  
Remarks:

### Capture Settings

Camera Type: sCMOS  
Laser Type: Green  
Camera Level: 7  
Slider Shutter: 121  
Slider Gain: 24  
FPS: 25.0  
Number of Frames: 749  
Temperature: 26.1 - 26.1 °C  
Viscosity: (Water) 0.866 - 0.868 cP  
Dilution factor: Dilution not recorded

### Analysis Settings

Detect Threshold: 5  
Blur Size: Auto  
Max Jump Distance: Auto: 15.5 - 33.5 pix

### Results

#### Stats: Merged Data

Mean: 115.3 nm  
Mode: 83.3 nm  
SD: 40.7 nm  
D10: 78.4 nm  
D50: 98.0 nm  
D90: 170.3 nm

#### Stats: Mean +/- Standard Error

Mean: 117.7 +/- 7.4 nm  
Mode: 90.2 +/- 2.5 nm  
SD: 38.0 +/- 4.2 nm  
D10: 77.6 +/- 3.7 nm  
D50: 105.6 +/- 9.7 nm  
D90: 166.5 +/- 14.7 nm  
Concentration (Upgrade): 2.35e+07 +/- 4.24e+06 particles/ml  
3.6 +/- 0.5 particles/frame  
5.6 +/- 0.9 centres/frame

Concentration measurements may be unreliable  
See summary file for more info

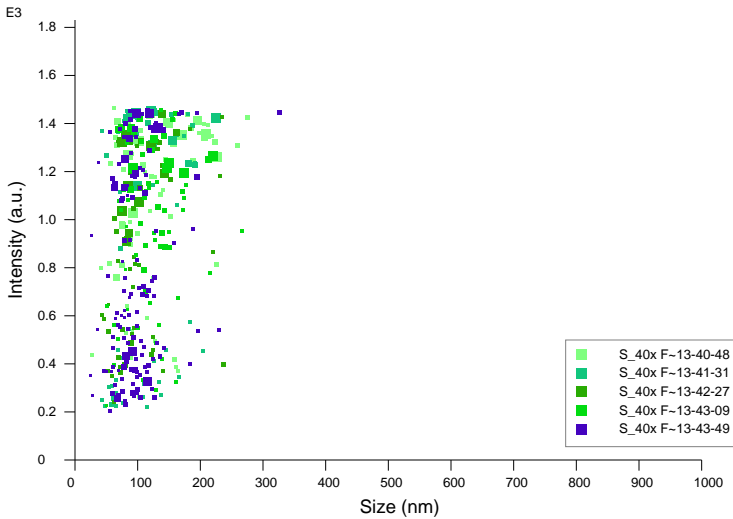

Intensity / Size graph for Experiment:  
S\_40x FD7 2023-05-31 13-40-12
