# Supplementary material for: Lyophilizing SERS biosensors to enable translation into an easy-to-use assay
Source: Royal Society of Chemistry journal article supplement (doi:10.1039/d4ay01667j), 2024-01-01
Supplement: d4ay01667j1.zip [file d4ay01667j1.zip]

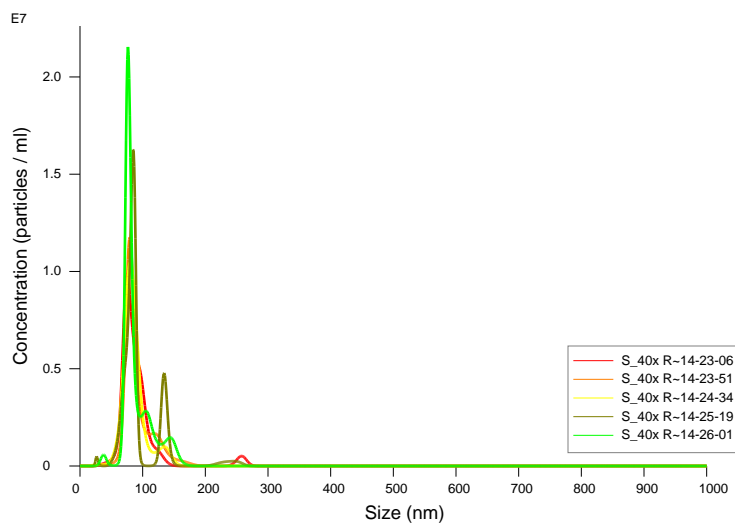

FTLA Concentration / Size graph for Experiment:  
S\_40x RT6 2023-05-24 14-22-29

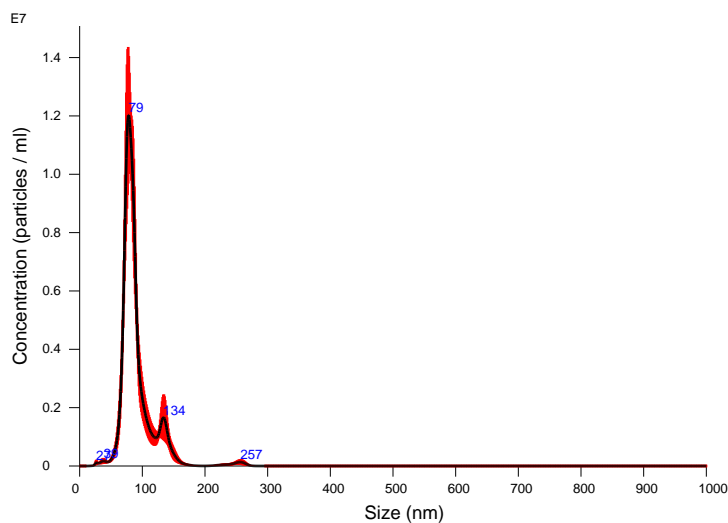

Averaged FTLA Concentration / Size for Experiment:  
S\_40x RT6 2023-05-24 14-22-29  
Error bars indicate + / - 1 standard error of the mean

### Included Files

S\_40x RT6 2023-05-24 14-23-06  
S\_40x RT6 2023-05-24 14-23-51  
S\_40x RT6 2023-05-24 14-24-34  
S\_40x RT6 2023-05-24 14-25-19  
S\_40x RT6 2023-05-24 14-26-01

### Details

NTA Version: NTA 3.4 Build 3.4.4  
Script Used: SOP Standard Measurement 02-22-29PM 24May2023.txt  
Time Captured: 14:22:29 24/05/2023  
Operator: LN  
Pre-treatment:  
Sample Name: S\_40x RT6  
Diluent:  
Remarks: Dilution from concentrated NPs+HITC

### Capture Settings

Camera Type: sCMOS  
Laser Type: Green  
Camera Level: 7  
Slider Shutter: 121  
Slider Gain: 24  
FPS: 25.0  
Number of Frames: 749  
Temperature: 25.0 - 25.0 °C  
Viscosity: (Water) 0.888 - 0.889 cP  
Dilution factor: Dilution not recorded

### Analysis Settings

Detect Threshold: 5  
Blur Size: Auto  
Max Jump Distance: Auto: 19.8 - 20.5 pix

### Results

#### Stats: Merged Data

Mean: 90.3 nm  
Mode: 78.1 nm  
SD: 27.6 nm  
D10: 69.7 nm  
D50: 82.8 nm  
D90: 127.6 nm

#### Stats: Mean +/- Standard Error

Mean: 90.3 +/- 1.4 nm  
Mode: 79.4 +/- 1.7 nm  
SD: 26.7 +/- 3.2 nm  
D10: 69.5 +/- 1.0 nm  
D50: 82.8 +/- 0.7 nm  
D90: 122.0 +/- 4.8 nm  
Concentration (Upgrade): 3.37e+08 +/- 1.67e+07 particles/ml  
52.6 +/- 2.4 particles/frame  
126.0 +/- 5.2 centres/frame

Concentration measurements may be unreliable  
See summary file for more info

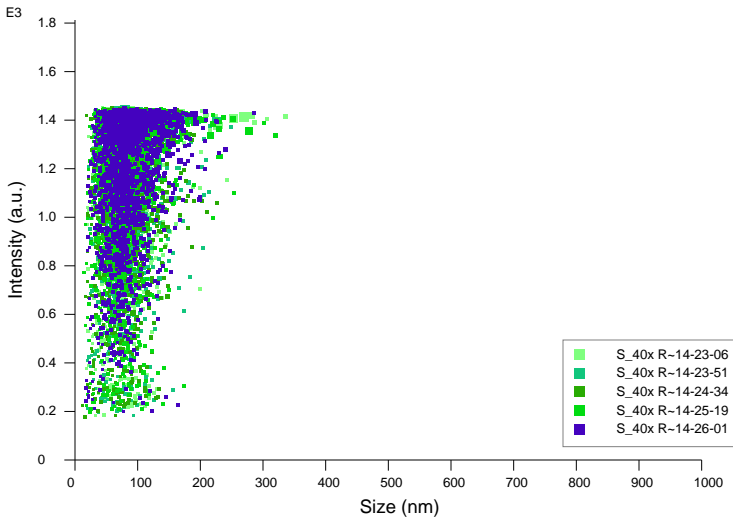

Intensity / Size graph for Experiment:  
S\_40x RT6 2023-05-24 14-22-29
