# Supplementary material for: Lyophilizing SERS biosensors to enable translation into an easy-to-use assay
Source: Royal Society of Chemistry journal article supplement (doi:10.1039/d4ay01667j), 2024-01-01
Supplement: d4ay01667j1.zip [file d4ay01667j1.zip]

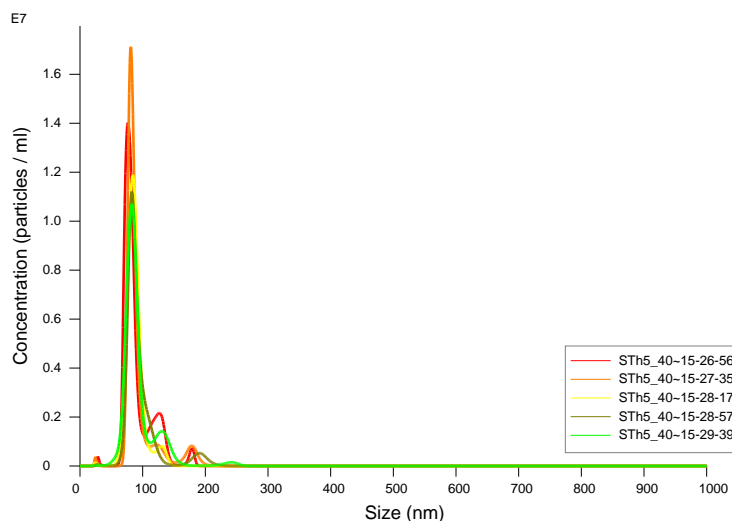

FTLA Concentration / Size graph for Experiment:  
STh5\_40x F 2023-05-24 15-26-41

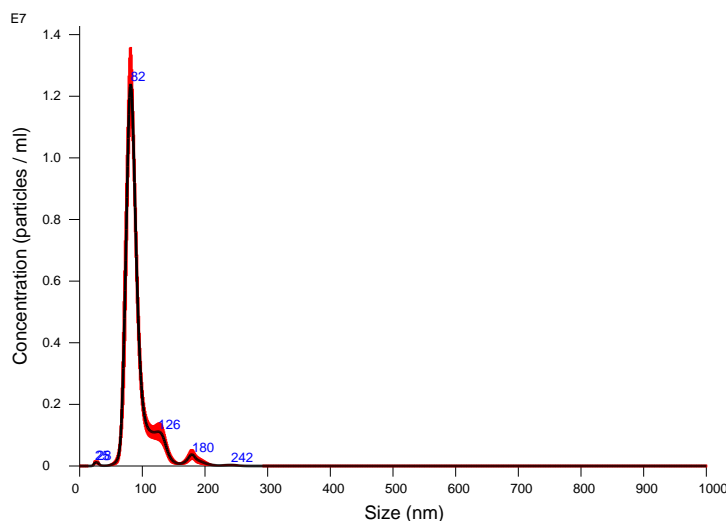

Averaged FTLA Concentration / Size for Experiment:  
STh5\_40x F 2023-05-24 15-26-41  
Error bars indicate + / - 1 standard error of the mean

### Included Files

STh5\_40x F 2023-05-24 15-26-56  
STh5\_40x F 2023-05-24 15-27-35  
STh5\_40x F 2023-05-24 15-28-17  
STh5\_40x F 2023-05-24 15-28-57  
STh5\_40x F 2023-05-24 15-29-39

### Details

NTA Version: NTA 3.4 Build 3.4.4  
Script Used: SOP Standard Measurement 03-26-41PM 24May2023.txt  
Time Captured: 15:26:41 24/05/2023  
Operator: LN  
Pre-treatment:  
Sample Name: STh5\_40x F  
Diluent:  
Remarks: Dilution from concentrated NPs+HITC

### Capture Settings

Camera Type: sCMOS  
Laser Type: Green  
Camera Level: 7  
Slider Shutter: 121  
Slider Gain: 24  
FPS: 25.0  
Number of Frames: 749  
Temperature: 25.8 - 25.9 °C  
Viscosity: (Water) 0.871 - 0.872 cP  
Dilution factor: Dilution not recorded

### Analysis Settings

Detect Threshold: 5  
Blur Size: Auto  
Max Jump Distance: Auto: 19.2 - 20.1 pix

### Results

#### Stats: Merged Data

Mean: 91.7 nm  
Mode: 81.4 nm  
SD: 24.7 nm  
D10: 73.2 nm  
D50: 84.6 nm  
D90: 122.3 nm

#### Stats: Mean +/- Standard Error

Mean: 91.7 +/- 1.3 nm  
Mode: 81.5 +/- 1.3 nm  
SD: 24.1 +/- 2.4 nm  
D10: 73.6 +/- 1.0 nm  
D50: 84.7 +/- 0.9 nm  
D90: 120.4 +/- 4.7 nm  
Concentration (Upgrade): 3.03e+08 +/- 1.07e+07 particles/ml  
47.2 +/- 1.3 particles/frame  
103.7 +/- 4.8 centres/frame

Concentration measurements may be unreliable  
See summary file for more info

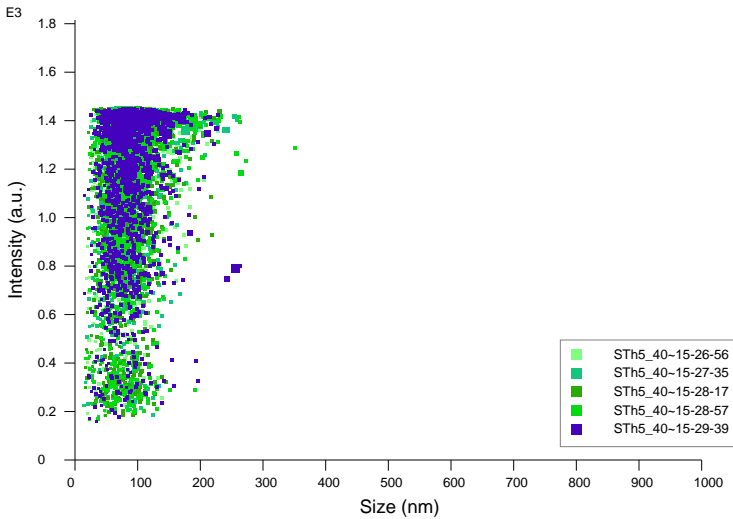

Intensity / Size graph for Experiment:  
STh5\_40x F 2023-05-24 15-26-41
