# Supplementary material for: Lyophilizing SERS biosensors to enable translation into an easy-to-use assay
Source: Royal Society of Chemistry journal article supplement (doi:10.1039/d4ay01667j), 2024-01-01
Supplement: d4ay01667j1.zip [file d4ay01667j1.zip]

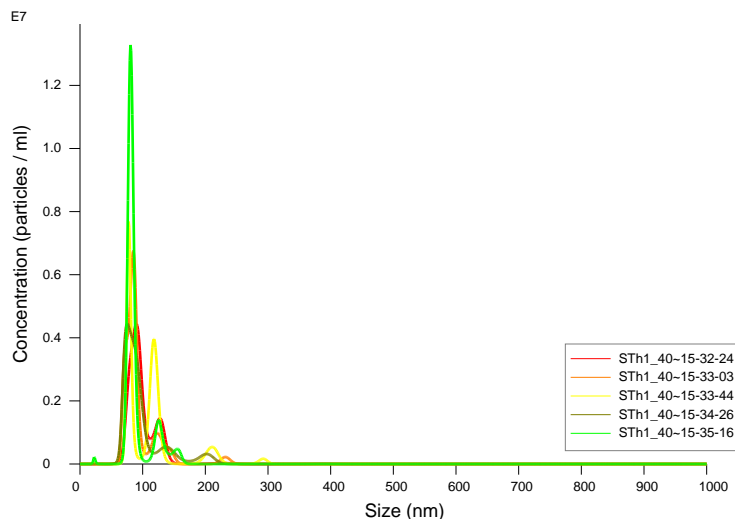

FTLA Concentration / Size graph for Experiment:  
STh1\_40x FD28 2023-06-21 15-32-07

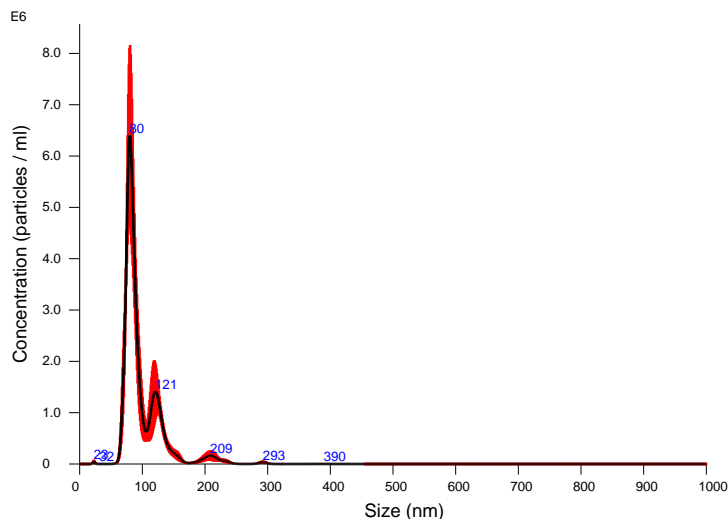

Averaged FTLA Concentration / Size for Experiment:  
STh1\_40x FD28 2023-06-21 15-32-07  
Error bars indicate + / - 1 standard error of the mean

### Included Files

STh1\_40x FD28 2023-06-21 15-32-24  
STh1\_40x FD28 2023-06-21 15-33-03  
STh1\_40x FD28 2023-06-21 15-33-44  
STh1\_40x FD28 2023-06-21 15-34-26  
STh1\_40x FD28 2023-06-21 15-35-16

### Details

NTA Version: NTA 3.4 Build 3.4.4  
Script Used: SOP Standard Measurement 03-32-07PM 21Jun2023.txt  
Time Captured: 15:32:07 21/06/2023  
Operator: LN  
Pre-treatment:  
Sample Name: STh1\_40x FD28  
Diluent:  
Remarks:

### Capture Settings

Camera Type: sCMOS  
Laser Type: Green  
Camera Level: 6  
Slider Shutter: 64  
Slider Gain: 5  
FPS: 25.0  
Number of Frames: 749  
Temperature: 25.6 - 25.6 °C  
Viscosity: (Water) 0.876 - 0.877 cP  
Dilution factor: Dilution not recorded

### Analysis Settings

Detect Threshold: 5  
Blur Size: Auto  
Max Jump Distance: Auto: 19.0 - 20.5 pix

### Results

#### Stats: Merged Data

Mean: 97.7 nm  
Mode: 79.9 nm  
SD: 32.3 nm  
D10: 73.9 nm  
D50: 85.8 nm  
D90: 131.3 nm

#### Stats: Mean +/- Standard Error

Mean: 98.0 +/- 3.5 nm  
Mode: 81.8 +/- 2.6 nm  
SD: 30.5 +/- 4.3 nm  
D10: 74.0 +/- 1.3 nm  
D50: 90.9 +/- 4.7 nm  
D90: 144.3 +/- 12.2 nm  
Concentration (Upgrade): 1.65e+08 +/- 7.01e+06 particles/ml  
27.1 +/- 1.3 particles/frame  
56.7 +/- 4.7 centres/frame

Concentration measurements may be unreliable  
See summary file for more info

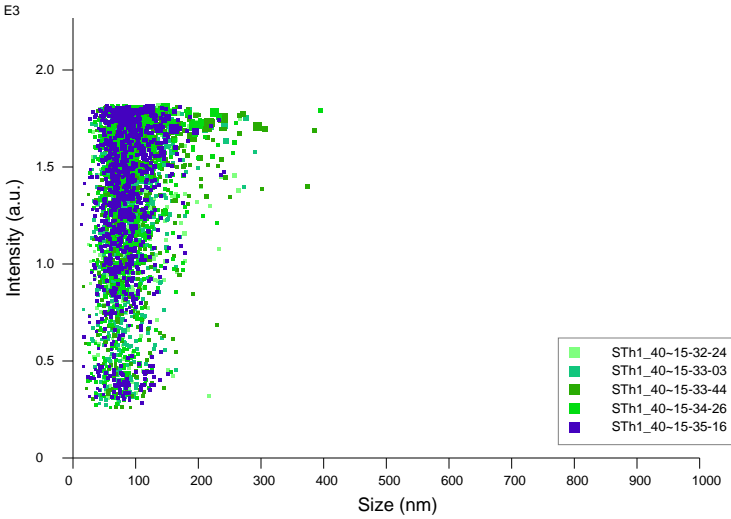

Intensity / Size graph for Experiment:  
STh1\_40x FD28 2023-06-21 15-32-07
