# Supplementary material for: Lyophilizing SERS biosensors to enable translation into an easy-to-use assay
Source: Royal Society of Chemistry journal article supplement (doi:10.1039/d4ay01667j), 2024-01-01
Supplement: d4ay01667j1.zip [file d4ay01667j1.zip]

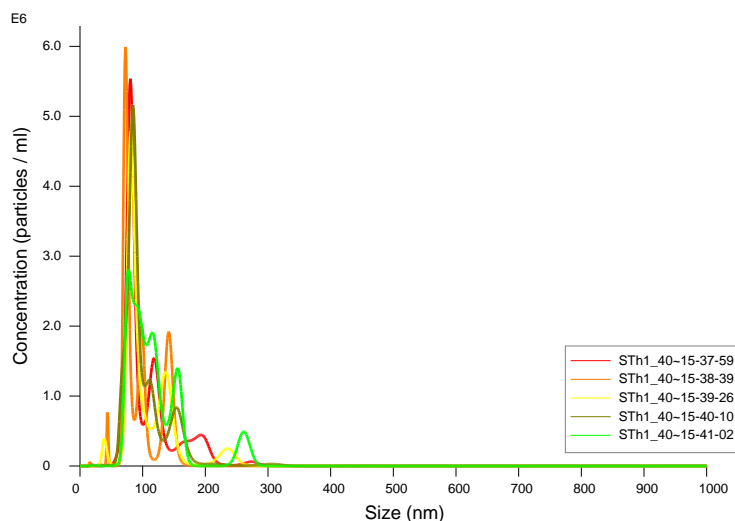

FTLA Concentration / Size graph for Experiment:  
STh1\_40x FD35 2023-06-28 15-37-45

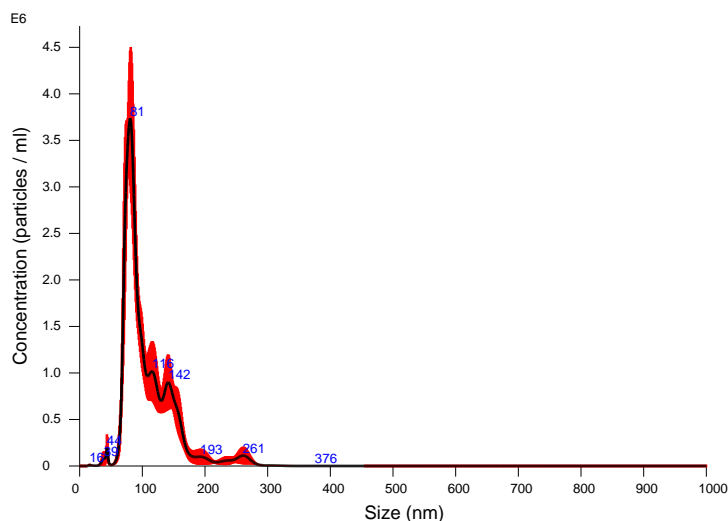

Averaged FTLA Concentration / Size for Experiment:  
STh1\_40x FD35 2023-06-28 15-37-45  
Error bars indicate + / - 1 standard error of the mean

### Included Files

STh1\_40x FD35 2023-06-28 15-37-59  
STh1\_40x FD35 2023-06-28 15-38-39  
STh1\_40x FD35 2023-06-28 15-39-26  
STh1\_40x FD35 2023-06-28 15-40-10  
STh1\_40x FD35 2023-06-28 15-41-02

### Details

NTA Version: NTA 3.4 Build 3.4.4  
Script Used: SOP Standard Measurement 03-37-45PM 28Jun2023.txt  
Time Captured: 15:37:45 28/06/2023  
Operator: LN  
Pre-treatment:  
Sample Name: STh1\_40x FD35  
Diluent:  
Remarks:

### Capture Settings

Camera Type: sCMOS  
Laser Type: Green  
Camera Level: 6  
Slider Shutter: 64  
Slider Gain: 5  
FPS: 25.0  
Number of Frames: 749  
Temperature: 25.8 °C  
Viscosity: (Water) 0.873 - 0.874 cP  
Dilution factor: Dilution not recorded

### Analysis Settings

Detect Threshold: 5  
Blur Size: Auto  
Max Jump Distance: Auto: 19.2 - 24.7 pix

### Results

#### Stats: Merged Data

Mean: 107.2 nm  
Mode: 80.6 nm  
SD: 40.9 nm  
D10: 72.8 nm  
D50: 92.3 nm  
D90: 155.4 nm

#### Stats: Mean +/- Standard Error

Mean: 106.7 +/- 3.7 nm  
Mode: 79.3 +/- 2.0 nm  
SD: 39.3 +/- 3.1 nm  
D10: 73.6 +/- 1.2 nm  
D50: 91.8 +/- 3.8 nm  
D90: 157.1 +/- 5.9 nm  
Concentration (Upgrade): 1.50e+08 +/- 7.47e+06 particles/ml  
24.5 +/- 1.2 particles/frame  
53.6 +/- 3.0 centres/frame

Concentration measurements may be unreliable  
See summary file for more info

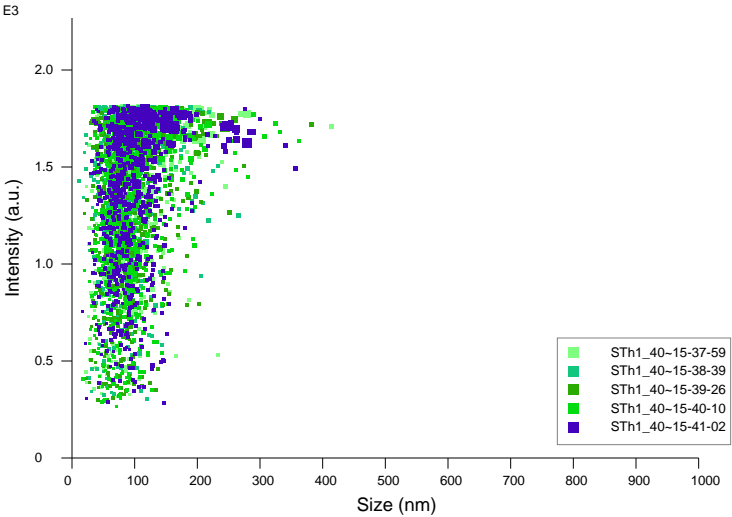

Intensity / Size graph for Experiment:  
STh1\_40x FD35 2023-06-28 15-37-45
