# Supplementary material for: Lyophilizing SERS biosensors to enable translation into an easy-to-use assay
Source: Royal Society of Chemistry journal article supplement (doi:10.1039/d4ay01667j), 2024-01-01
Supplement: d4ay01667j1.zip [file d4ay01667j1.zip]

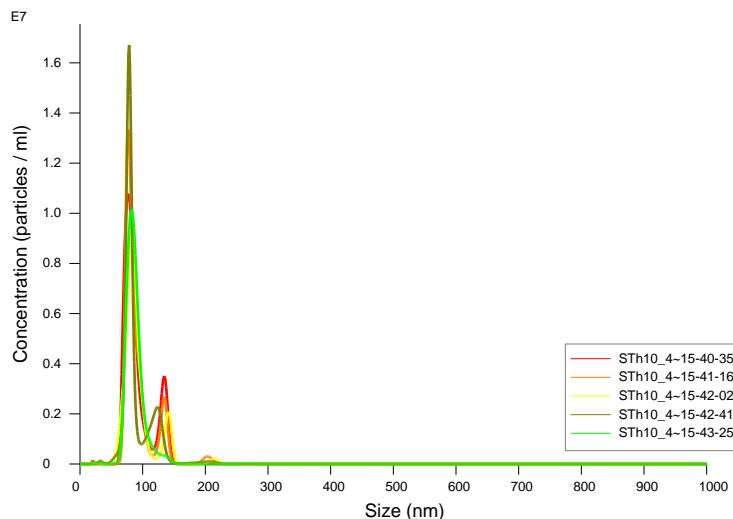

FTLA Concentration / Size graph for Experiment:  
STh10\_40x FD0 2023-05-24 15-40-23

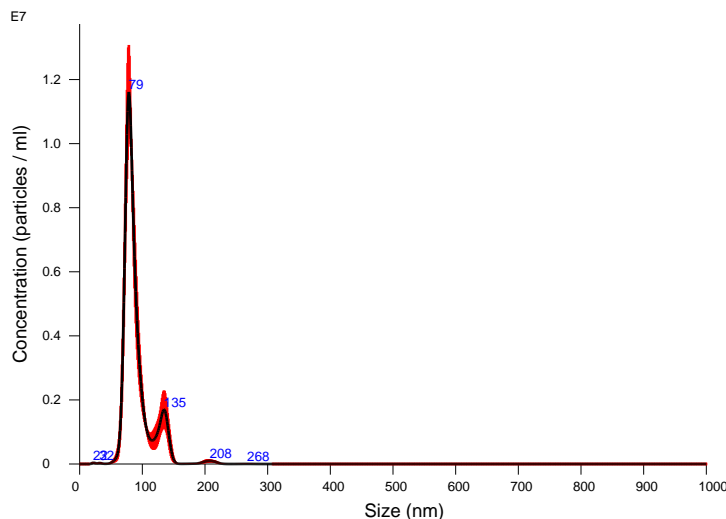

Averaged FTLA Concentration / Size for Experiment:  
STh10\_40x FD0 2023-05-24 15-40-23  
Error bars indicate + / - 1 standard error of the mean

### Included Files

STh10\_40x FD0 2023-05-24 15-40-35  
STh10\_40x FD0 2023-05-24 15-41-16  
STh10\_40x FD0 2023-05-24 15-42-02  
STh10\_40x FD0 2023-05-24 15-42-41  
STh10\_40x FD0 2023-05-24 15-43-25

### Details

NTA Version: NTA 3.4 Build 3.4.4  
Script Used: SOP Standard Measurement 03-40-23PM 24May2023.txt  
Time Captured: 15:40:23 24/05/2023  
Operator: LN  
Pre-treatment:  
Sample Name: STh10\_40x FD0  
Diluent:  
Remarks: Dilution from concentrated NPs+HITC

### Capture Settings

Camera Type: sCMOS  
Laser Type: Green  
Camera Level: 7  
Slider Shutter: 121  
Slider Gain: 24  
FPS: 25.0  
Number of Frames: 749  
Temperature: 25.9 °C  
Viscosity: (Water) 0.869 - 0.870 cP  
Dilution factor: Dilution not recorded

### Analysis Settings

Detect Threshold: 5  
Blur Size: Auto  
Max Jump Distance: Auto: 19.4 - 20.5 pix

### Results

Stats: Merged Data

Mean: 90.1 nm  
Mode: 78.6 nm  
SD: 22.8 nm  
D10: 71.8 nm  
D50: 82.9 nm  
D90: 127.6 nm

Stats: Mean +/- Standard Error

Mean: 90.1 +/- 0.9 nm  
Mode: 79.4 +/- 1.3 nm  
SD: 22.3 +/- 1.8 nm  
D10: 71.8 +/- 0.5 nm  
D50: 83.1 +/- 0.8 nm  
D90: 125.5 +/- 5.8 nm  
Concentration (Upgrade): 2.82e+08 +/- 8.75e+06 particles/ml  
43.2 +/- 0.9 particles/frame  
94.4 +/- 3.7 centres/frame

Concentration measurements may be unreliable  
See summary file for more info

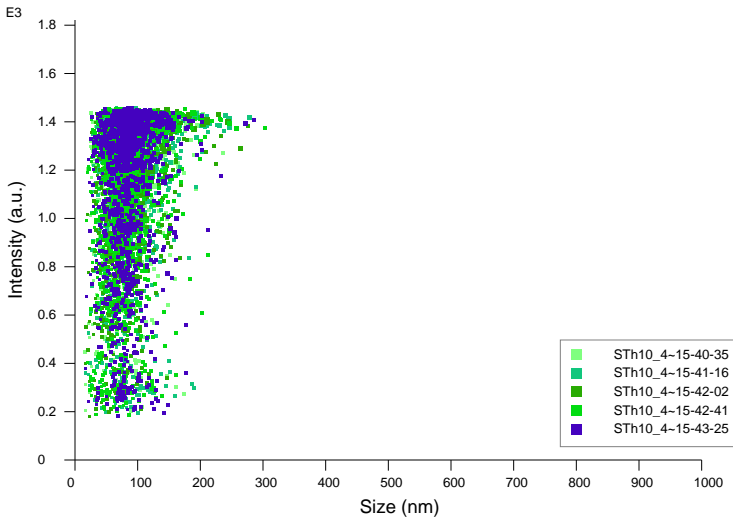

Intensity / Size graph for Experiment:  
STh10\_40x FD0 2023-05-24 15-40-23
