# Supplementary material for: Lyophilizing SERS biosensors to enable translation into an easy-to-use assay
Source: Royal Society of Chemistry journal article supplement (doi:10.1039/d4ay01667j), 2024-01-01
Supplement: d4ay01667j1.zip [file d4ay01667j1.zip]

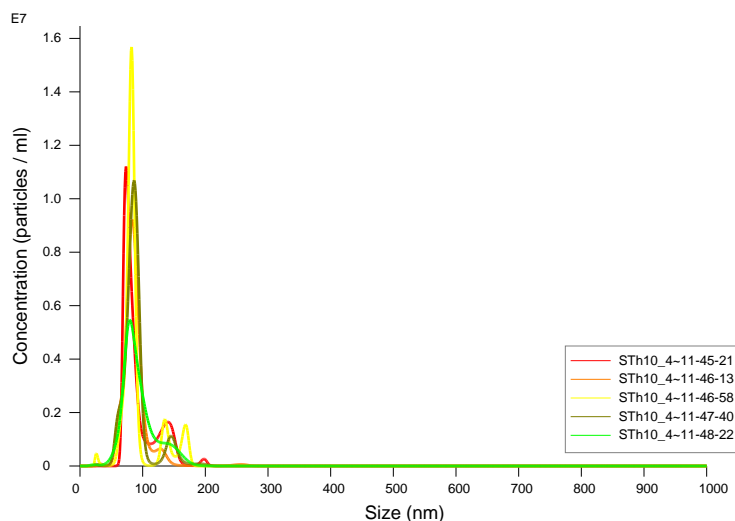

FTLA Concentration / Size graph for Experiment:  
STh10\_40x FD14 2023-06-07 11-44-59

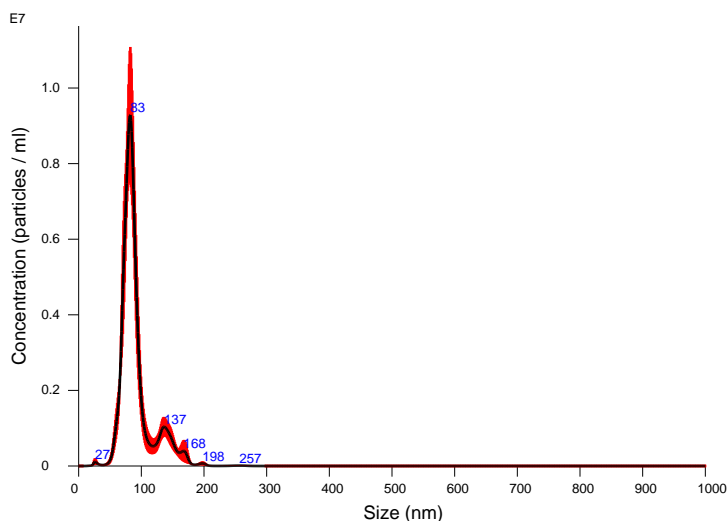

Averaged FTLA Concentration / Size for Experiment:  
STh10\_40x FD14 2023-06-07 11-44-59  
Error bars indicate + / - 1 standard error of the mean

### Included Files

STh10\_40x FD14 2023-06-07 11-45-21  
STh10\_40x FD14 2023-06-07 11-46-13  
STh10\_40x FD14 2023-06-07 11-46-58  
STh10\_40x FD14 2023-06-07 11-47-40  
STh10\_40x FD14 2023-06-07 11-48-22

### Details

NTA Version: NTA 3.4 Build 3.4.4  
Script Used: SOP Standard Measurement 11-44-59AM 07Jun2023.txt  
Time Captured: 11:44:59 07/06/2023  
Operator: LN  
Pre-treatment:  
Sample Name: STh10\_40x FD14  
Diluent:  
Remarks:

### Capture Settings

Camera Type: sCMOS  
Laser Type: Green  
Camera Level: 7  
Slider Shutter: 121  
Slider Gain: 24  
FPS: 25.0  
Number of Frames: 749  
Temperature: 25.0 - 25.1 °C  
Viscosity: (Water) 0.886 - 0.888 cP  
Dilution factor: Dilution not recorded

### Analysis Settings

Detect Threshold: 5  
Blur Size: Auto  
Max Jump Distance: Auto: 19.2 - 22.2 pix

### Results

#### Stats: Merged Data

Mean: 91.0 nm  
Mode: 82.2 nm  
SD: 26.0 nm  
D10: 69.2 nm  
D50: 83.9 nm  
D90: 133.8 nm

#### Stats: Mean +/- Standard Error

Mean: 91.0 +/- 1.3 nm  
Mode: 81.0 +/- 2.1 nm  
SD: 25.7 +/- 1.4 nm  
D10: 68.9 +/- 0.8 nm  
D50: 84.2 +/- 1.1 nm  
D90: 126.9 +/- 7.6 nm  
Concentration (Upgrade): 2.67e+08 +/- 9.79e+06 particles/ml  
42.3 +/- 1.7 particles/frame  
88.0 +/- 3.8 centres/frame

Concentration measurements may be unreliable  
See summary file for more info

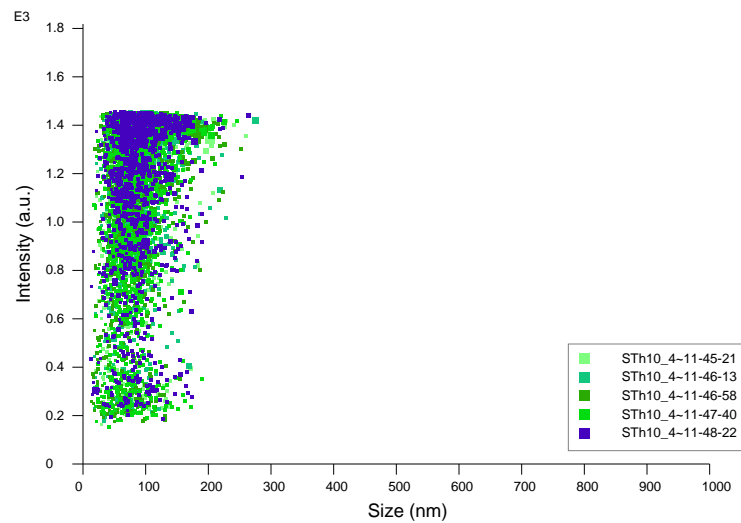

Intensity / Size graph for Experiment:  
STh10\_40x FD14 2023-06-07 11-44-59
