# Supplementary material for: Lyophilizing SERS biosensors to enable translation into an easy-to-use assay
Source: Royal Society of Chemistry journal article supplement (doi:10.1039/d4ay01667j), 2024-01-01
Supplement: d4ay01667j1.zip [file d4ay01667j1.zip]

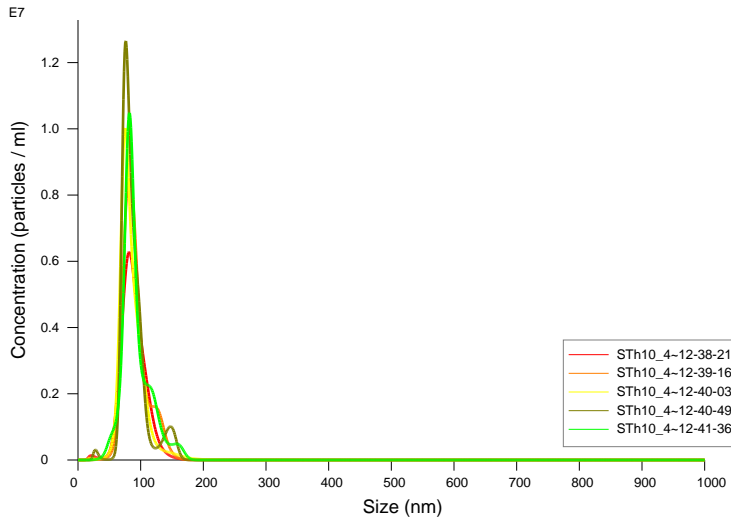

FTLA Concentration / Size graph for Experiment:  
STh10\_40x RT13 2023-05-31 12-38-06

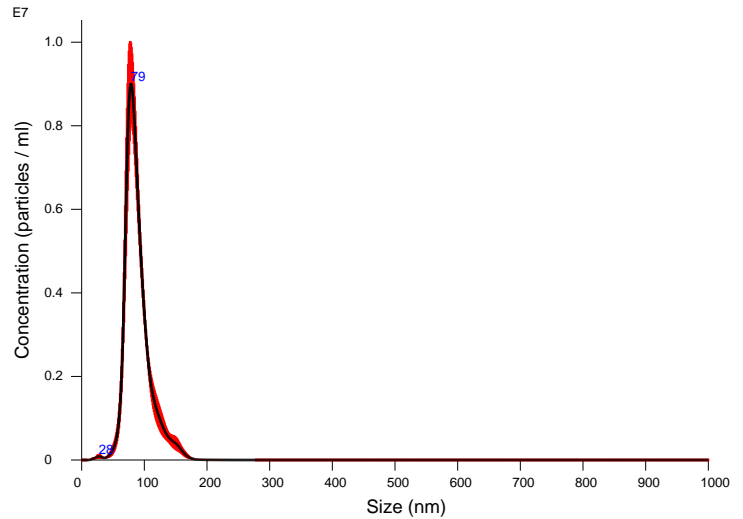

Averaged FTLA Concentration / Size for Experiment:  
STh10\_40x RT13 2023-05-31 12-38-06  
Error bars indicate + / - 1 standard error of the mean

### Included Files

STh10\_40x RT13 2023-05-31 12-38-21  
STh10\_40x RT13 2023-05-31 12-39-16  
STh10\_40x RT13 2023-05-31 12-40-03  
STh10\_40x RT13 2023-05-31 12-40-49  
STh10\_40x RT13 2023-05-31 12-41-36

### Details

NTA Version: NTA 3.4 Build 3.4.4  
Script Used: SOP Standard Measurement 12-38-06PM 31May2023.txt  
Time Captured: 12:38:06 31/05/2023  
Operator: LN  
Pre-treatment:  
Sample Name: STh10\_40x RT13  
Diluent:  
Remarks:

### Capture Settings

Camera Type: sCMOS  
Laser Type: Green  
Camera Level: 7  
Slider Shutter: 121  
Slider Gain: 24  
FPS: 25.0  
Number of Frames: 749  
Temperature: 24.9 - 24.9 °C  
Viscosity: (Water) 0.890 - 0.891 cP  
Dilution factor: Dilution not recorded

### Analysis Settings

Detect Threshold: 5  
Blur Size: Auto  
Max Jump Distance: Auto: 19.6 - 21.9 pix

### Results

#### Stats: Merged Data

Mean: 88.8 nm  
Mode: 78.7 nm  
SD: 20.7 nm  
D10: 69.0 nm  
D50: 84.5 nm  
D90: 116.2 nm

#### Stats: Mean +/- Standard Error

Mean: 88.8 +/- 1.2 nm  
Mode: 79.5 +/- 1.6 nm  
SD: 20.4 +/- 0.6 nm  
D10: 68.9 +/- 0.9 nm  
D50: 84.5 +/- 1.2 nm  
D90: 115.1 +/- 3.1 nm  
Concentration (Upgrade): 3.09e+08 +/- 1.49e+07 particles/ml  
48.1 +/- 2.4 particles/frame  
115.3 +/- 3.7 centres/frame

Concentration measurements may be unreliable  
See summary file for more info

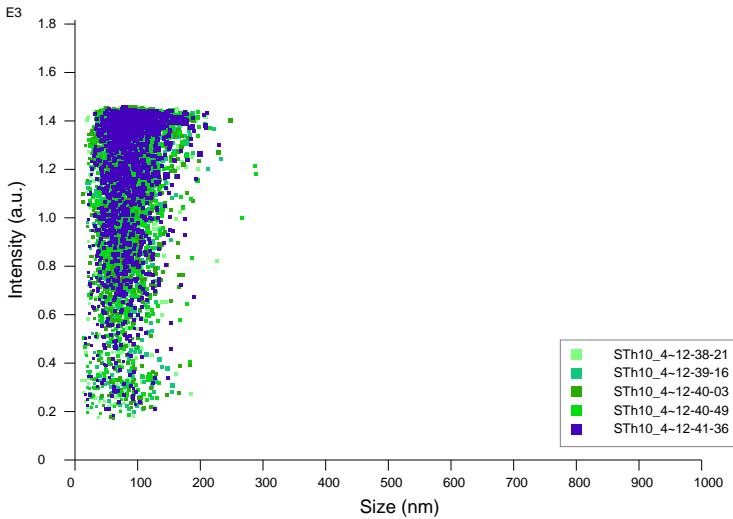

Intensity / Size graph for Experiment:  
STh10\_40x RT13 2023-05-31 12-38-06
