# Supplementary material for: Lyophilizing SERS biosensors to enable translation into an easy-to-use assay
Source: Royal Society of Chemistry journal article supplement (doi:10.1039/d4ay01667j), 2024-01-01
Supplement: d4ay01667j1.zip [file d4ay01667j1.zip]

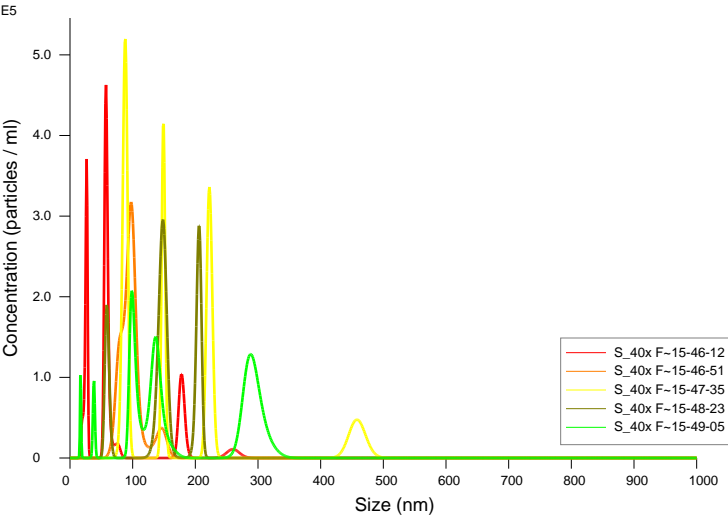

FTLA Concentration / Size graph for Experiment:  
S\_40x FD35 2023-06-28 15-45-44

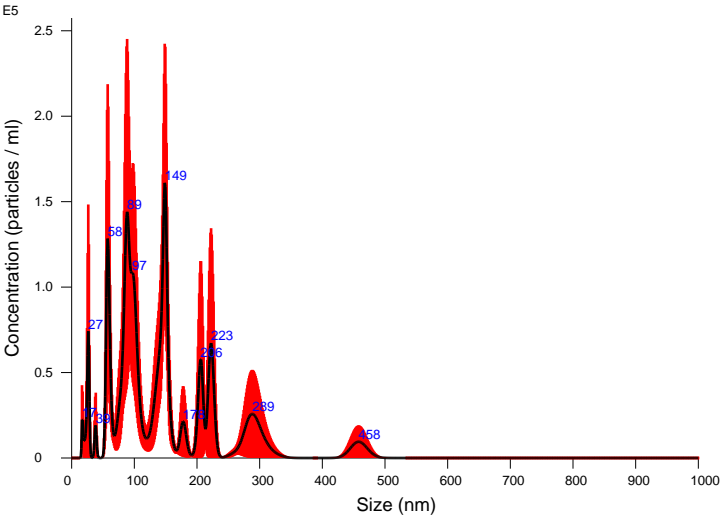

Averaged FTLA Concentration / Size for Experiment:  
S\_40x FD35 2023-06-28 15-45-44  
Error bars indicate + / - 1 standard error of the mean

Included Files

- S\_40x FD35 2023-06-28 15-46-12
- S\_40x FD35 2023-06-28 15-46-51
- S\_40x FD35 2023-06-28 15-47-35
- S\_40x FD35 2023-06-28 15-48-23
- S\_40x FD35 2023-06-28 15-49-05

Details

NTA Version: NTA 3.4 Build 3.4.4  
Script Used: SOP Standard Measurement 03-45-44PM 28Jun2023.txt  
Time Captured: 15:45:44 28/06/2023  
Operator: LN  
Pre-treatment:  
Sample Name: S\_40x FD35  
Diluent:  
Remarks:

Capture Settings

Camera Type: sCMOS  
Laser Type: Green  
Camera Level: 7  
Slider Shutter: 121  
Slider Gain: 24  
FPS: 25.0  
Number of Frames: 749  
Temperature: 25.8 °C  
Viscosity: (Water) 0.871 - 0.872 cP  
Dilution factor: Dilution not recorded

Analysis Settings

Detect Threshold: 5  
Blur Size: Auto  
Max Jump Distance: Auto: 13.3 - 31.3 pix

Results

Stats: Merged Data

Mean: 148.2 nm  
Mode: 148.8 nm  
SD: 90.7 nm  
D10: 58.5 nm  
D50: 133.9 nm  
D90: 282.0 nm

Stats: Mean +/- Standard Error

Mean: 139.3 +/- 21.6 nm  
Mode: 98.0 +/- 14.6 nm  
SD: 67.7 +/- 16.6 nm  
D10: 68.8 +/- 12.4 nm  
D50: 119.0 +/- 18.3 nm  
D90: 251.3 +/- 56.3 nm  
Concentration (Upgrade): 1.02e+07 +/- 1.17e+06 particles/ml  
1.6 +/- 0.2 particles/frame  
2.4 +/- 0.5 centres/frame

Concentration measurements may be unreliable  
See summary file for more info

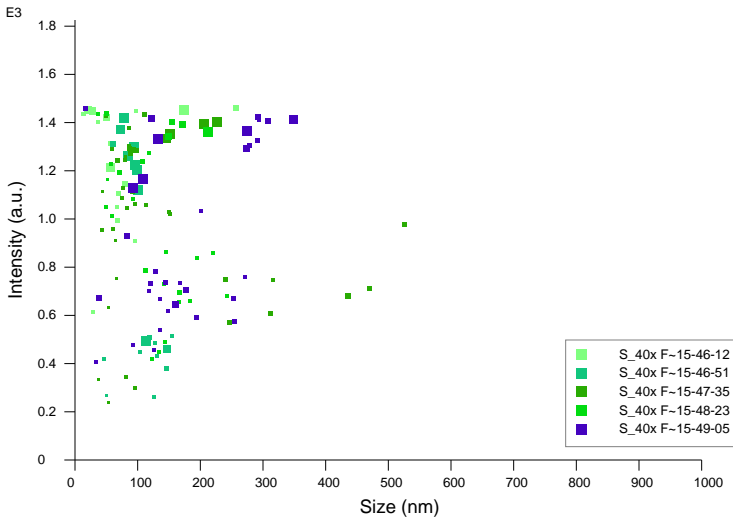

Intensity / Size graph for Experiment:  
S\_40x FD35 2023-06-28 15-45-44
