# Supplementary material for: Lyophilizing SERS biosensors to enable translation into an easy-to-use assay
Source: Royal Society of Chemistry journal article supplement (doi:10.1039/d4ay01667j), 2024-01-01
Supplement: d4ay01667j1.zip [file d4ay01667j1.zip]

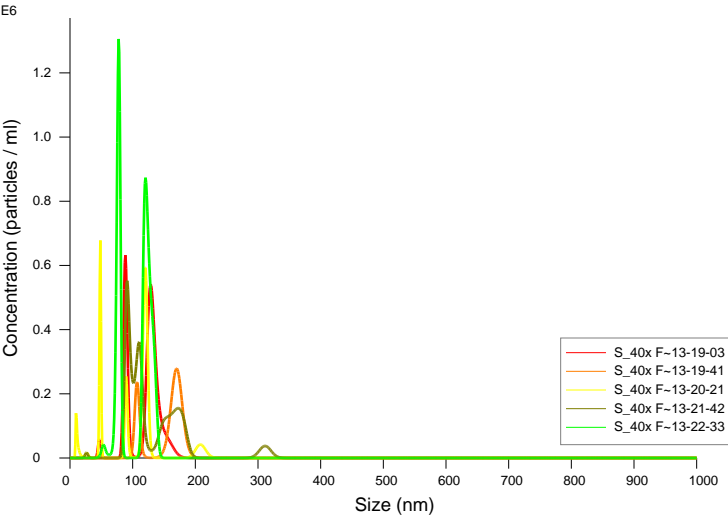

FTLA Concentration / Size graph for Experiment:  
S\_40x FD21 2023-06-14 13-18-41

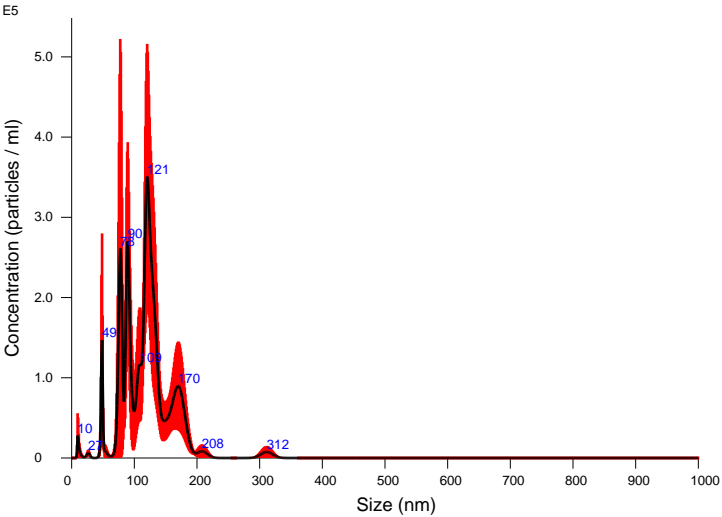

Averaged FTLA Concentration / Size for Experiment:  
S\_40x FD21 2023-06-14 13-18-41  
Error bars indicate + / - 1 standard error of the mean

|                                                                                                                                                                                                                                                                                                                                                                                                                                                                                                                                                                                                                                                                                                                                                                                                                                                                                                                                                                                                                                                                                    |                                                                                                                                                                                                                                                                                                                                                                                                                                                                                                                                                                                                                                                                                                                                                         |
|------------------------------------------------------------------------------------------------------------------------------------------------------------------------------------------------------------------------------------------------------------------------------------------------------------------------------------------------------------------------------------------------------------------------------------------------------------------------------------------------------------------------------------------------------------------------------------------------------------------------------------------------------------------------------------------------------------------------------------------------------------------------------------------------------------------------------------------------------------------------------------------------------------------------------------------------------------------------------------------------------------------------------------------------------------------------------------|---------------------------------------------------------------------------------------------------------------------------------------------------------------------------------------------------------------------------------------------------------------------------------------------------------------------------------------------------------------------------------------------------------------------------------------------------------------------------------------------------------------------------------------------------------------------------------------------------------------------------------------------------------------------------------------------------------------------------------------------------------|
| <div><div>Included Files</div><div>S_40x FD21 2023-06-14 13-19-03<br/>S_40x FD21 2023-06-14 13-19-41<br/>S_40x FD21 2023-06-14 13-20-21<br/>S_40x FD21 2023-06-14 13-21-42<br/>S_40x FD21 2023-06-14 13-22-33</div><div><div>Details</div><div><div>NTA Version:NTA 3.4 Build 3.4.4</div><div>Script Used:SOP Standard Measurement 01-18-41PM 14Jun2023.txt</div><div>Time Captured:13:18:41 14/06/2023</div><div>Operator:LN</div><div>Pre-treatment:</div><div>Sample Name:S_40x FD21</div><div>Diluent:</div><div>Remarks:</div></div><div><div>Capture Settings</div><div><div>Camera Type:sCMOS</div><div>Laser Type:Green</div><div>Camera Level:7</div><div>Slider Shutter:121</div><div>Slider Gain:24</div><div>FPS25.0</div><div>Number of Frames:749</div><div>Temperature:25.6 °C</div><div>Viscosity:(Water) 0.875 - 0.877 cP</div><div>Dilution factor:Dilution not recorded</div></div><div><div>Analysis Settings</div><div><div>Detect Threshold:5</div><div>Blur Size:Auto</div><div>Max Jump Distance:Auto: 14.9 - 33.8 pix</div></div></div></div></div></div> | <div><div>Results</div><div><div>Stats: Merged Data</div><div><div>Mean:119.2 nm</div><div>Mode:120.7 nm</div><div>SD:40.1 nm</div><div>D10:77.1 nm</div><div>D50:119.4 nm</div><div>D90:169.4 nm</div></div><div><div>Stats: Mean +/- Standard Error</div><div><div>Mean:122.2 +/- 9.4 nm</div><div>Mode:95.1 +/- 20.2 nm</div><div>SD:35.3 +/- 5.7 nm</div><div>D10:81.0 +/- 9.8 nm</div><div>D50:127.8 +/- 9.8 nm</div><div>D90:152.9 +/- 11.6 nm</div></div><div><div>Concentration (Upgrade):1.58e+07 +/- 2.83e+06 particles/ml</div><div>2.5 +/- 0.5 particles/frame</div><div>3.9 +/- 0.9 centres/frame</div></div><div><div>Concentration measurements may be unreliable</div><div>See summary file for more info</div></div></div></div></div> |
|------------------------------------------------------------------------------------------------------------------------------------------------------------------------------------------------------------------------------------------------------------------------------------------------------------------------------------------------------------------------------------------------------------------------------------------------------------------------------------------------------------------------------------------------------------------------------------------------------------------------------------------------------------------------------------------------------------------------------------------------------------------------------------------------------------------------------------------------------------------------------------------------------------------------------------------------------------------------------------------------------------------------------------------------------------------------------------|---------------------------------------------------------------------------------------------------------------------------------------------------------------------------------------------------------------------------------------------------------------------------------------------------------------------------------------------------------------------------------------------------------------------------------------------------------------------------------------------------------------------------------------------------------------------------------------------------------------------------------------------------------------------------------------------------------------------------------------------------------|

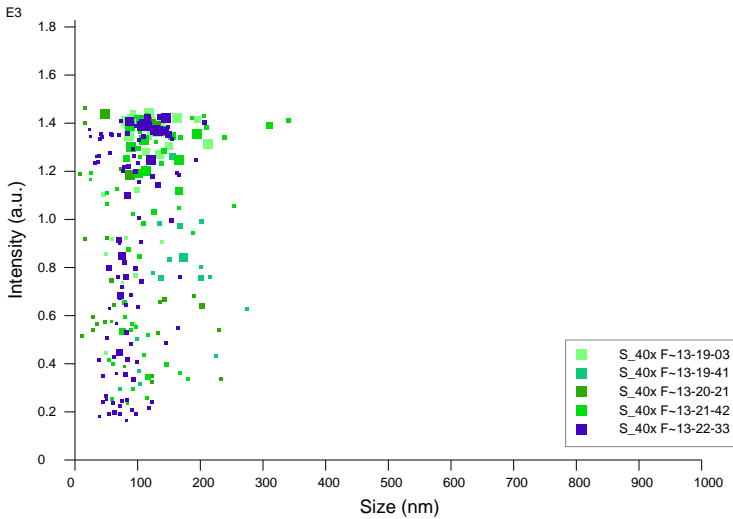

Intensity / Size graph for Experiment:  
S\_40x FD21 2023-06-14 13-18-41
