# Supplementary material for: Lyophilizing SERS biosensors to enable translation into an easy-to-use assay
Source: Royal Society of Chemistry journal article supplement (doi:10.1039/d4ay01667j), 2024-01-01
Supplement: d4ay01667j1.zip [file d4ay01667j1.zip]

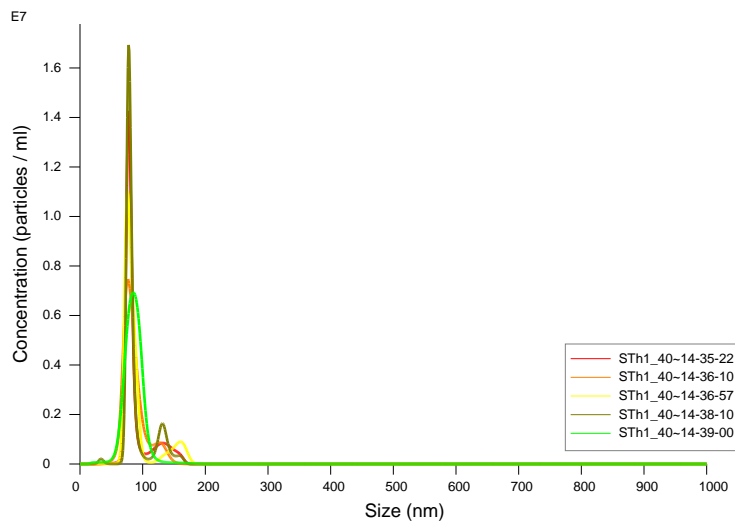

FTLA Concentration / Size graph for Experiment:  
STh1\_40x RT41 2023-06-28 14-35-06

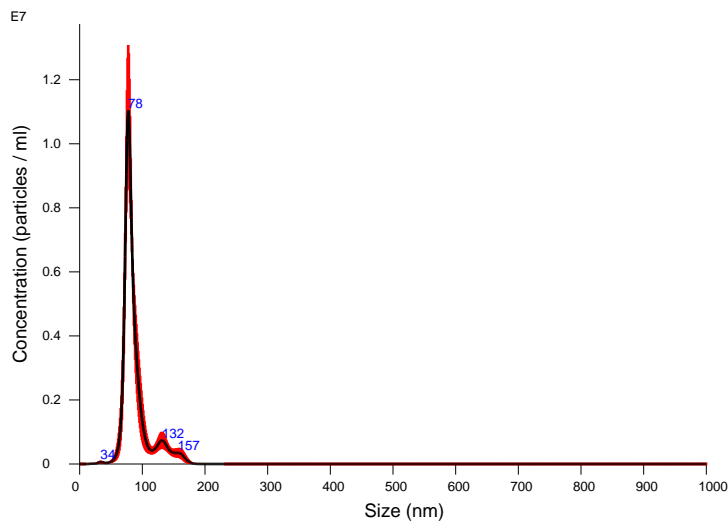

Averaged FTLA Concentration / Size for Experiment:  
STh1\_40x RT41 2023-06-28 14-35-06  
Error bars indicate + / - 1 standard error of the mean

### Included Files

STh1\_40x RT41 2023-06-28 14-35-22  
STh1\_40x RT41 2023-06-28 14-36-10  
STh1\_40x RT41 2023-06-28 14-36-57  
STh1\_40x RT41 2023-06-28 14-38-10  
STh1\_40x RT41 2023-06-28 14-39-00

### Details

NTA Version: NTA 3.4 Build 3.4.4  
Script Used: SOP Standard Measurement 02-35-06PM 28Jun2023.txt  
Time Captured: 14:35:06 28/06/2023  
Operator: LN  
Pre-treatment:  
Sample Name: STh1\_40x RT41  
Diluent:  
Remarks:

### Capture Settings

Camera Type: sCMOS  
Laser Type: Green  
Camera Level: 6  
Slider Shutter: 64  
Slider Gain: 5  
FPS: 25.0  
Number of Frames: 749  
Temperature: 24.5 - 24.5 °C  
Viscosity: (Water) 0.9 cP  
Dilution factor: Dilution not recorded

### Analysis Settings

Detect Threshold: 5  
Blur Size: Auto  
Max Jump Distance: Auto: 19.8 - 21.6 pix

### Results

#### Stats: Merged Data

Mean: 87.8 nm  
Mode: 77.6 nm  
SD: 21.7 nm  
D10: 71.2 nm  
D50: 81.0 nm  
D90: 122.5 nm

#### Stats: Mean +/- Standard Error

Mean: 87.8 +/- 0.9 nm  
Mode: 78.5 +/- 1.7 nm  
SD: 21.4 +/- 1.9 nm  
D10: 70.9 +/- 1.2 nm  
D50: 81.4 +/- 1.0 nm  
D90: 124.8 +/- 7.4 nm  
Concentration (Upgrade): 2.24e+08 +/- 3.26e+06 particles/ml  
36.8 +/- 0.4 particles/frame  
95.8 +/- 9.0 centres/frame

Concentration measurements may be unreliable  
See summary file for more info

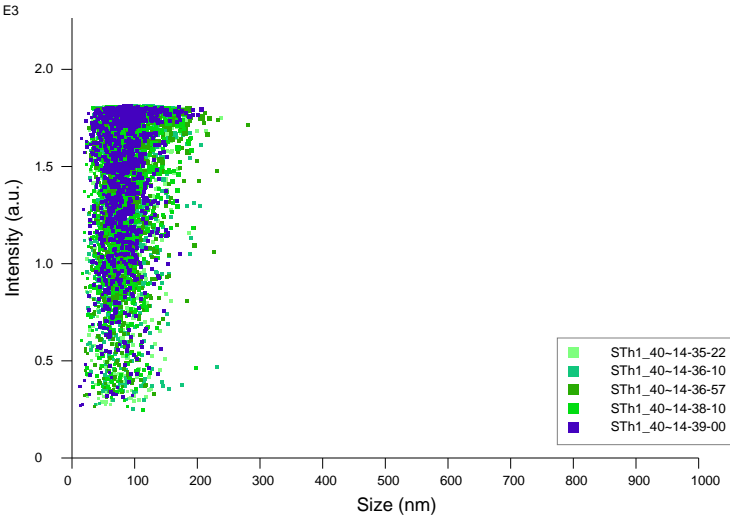

Intensity / Size graph for Experiment:  
STh1\_40x RT41 2023-06-28 14-35-06
