# Supplementary material for: Lyophilizing SERS biosensors to enable translation into an easy-to-use assay
Source: Royal Society of Chemistry journal article supplement (doi:10.1039/d4ay01667j), 2024-01-01
Supplement: d4ay01667j1.zip [file d4ay01667j1.zip]

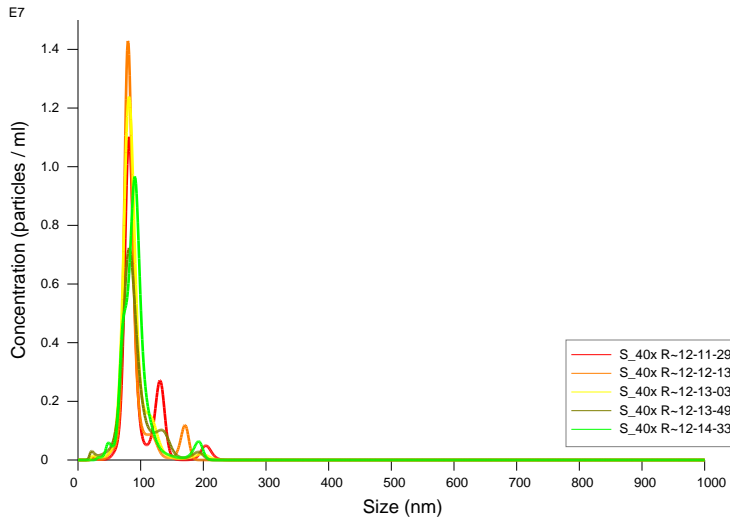

FTLA Concentration / Size graph for Experiment:  
S\_40x RT13 2023-05-31 12-10-45

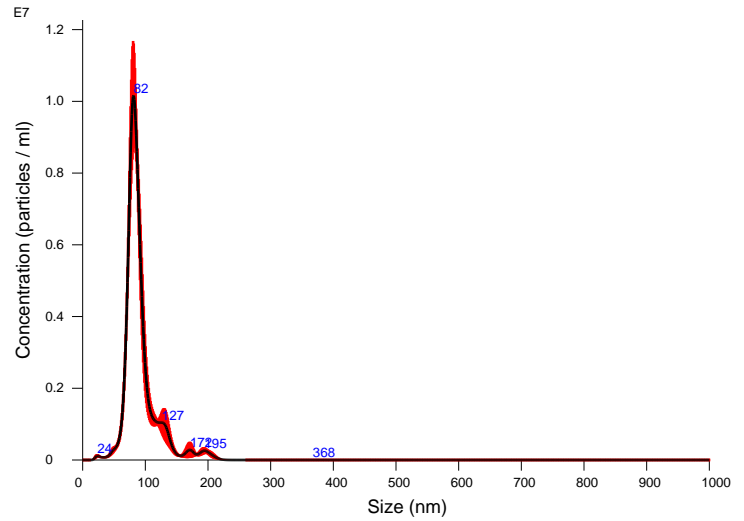

Averaged FTLA Concentration / Size for Experiment:  
S\_40x RT13 2023-05-31 12-10-45  
Error bars indicate + / - 1 standard error of the mean

### Included Files

S\_40x RT13 2023-05-31 12-11-29  
S\_40x RT13 2023-05-31 12-12-13  
S\_40x RT13 2023-05-31 12-13-03  
S\_40x RT13 2023-05-31 12-13-49  
S\_40x RT13 2023-05-31 12-14-33

### Details

NTA Version: NTA 3.4 Build 3.4.4  
Script Used: SOP Standard Measurement 12-10-45PM 31May2023.txt  
Time Captured: 12:10:45 31/05/2023  
Operator: LN  
Pre-treatment:  
Sample Name: S\_40x RT13  
Diluent:  
Remarks:

### Capture Settings

Camera Type: sCMOS  
Laser Type: Green  
Camera Level: 7  
Slider Shutter: 121  
Slider Gain: 24  
FPS: 25.0  
Number of Frames: 749  
Temperature: 24.4 °C  
Viscosity: (Water) 0.9 cP  
Dilution factor: Dilution not recorded

### Analysis Settings

Detect Threshold: 5  
Blur Size: Auto  
Max Jump Distance: Auto: 19.2 - 22.2 pix

### Results

#### Stats: Merged Data

Mean: 91.3 nm  
Mode: 81.2 nm  
SD: 26.2 nm  
D10: 70.5 nm  
D50: 84.8 nm  
D90: 123.9 nm

#### Stats: Mean +/- Standard Error

Mean: 91.5 +/- 1.4 nm  
Mode: 83.0 +/- 1.9 nm  
SD: 26.1 +/- 1.3 nm  
D10: 70.3 +/- 1.0 nm  
D50: 85.1 +/- 1.3 nm  
D90: 121.7 +/- 4.3 nm  
Concentration (Upgrade): 2.98e+08 +/- 1.39e+07 particles/ml  
48.2 +/- 2.1 particles/frame  
114.9 +/- 7.8 centres/frame

Concentration measurements may be unreliable  
See summary file for more info

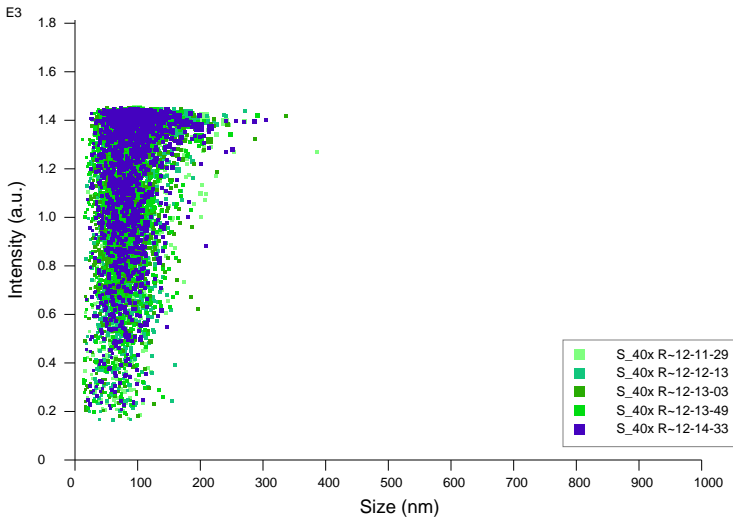

Intensity / Size graph for Experiment:  
S\_40x RT13 2023-05-31 12-10-45
