# Supplementary material for: Lyophilizing SERS biosensors to enable translation into an easy-to-use assay
Source: Royal Society of Chemistry journal article supplement (doi:10.1039/d4ay01667j), 2024-01-01
Supplement: d4ay01667j1.zip [file d4ay01667j1.zip]

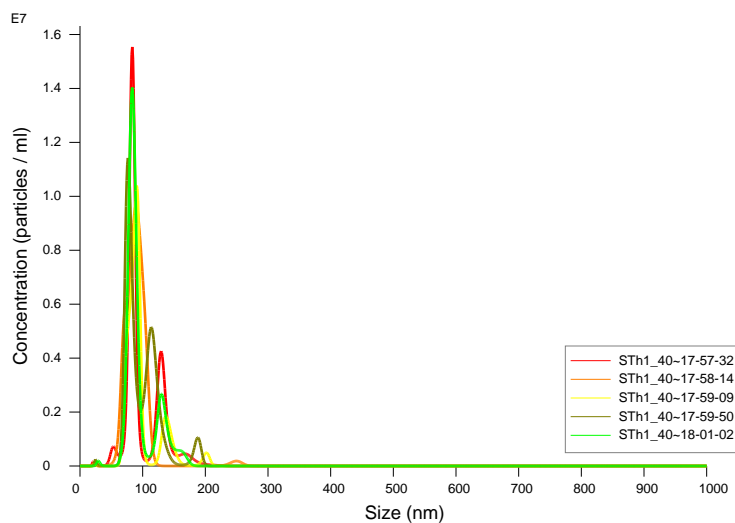

FTLA Concentration / Size graph for Experiment:  
STh1\_40x FD0 2023-05-24 17-57-15

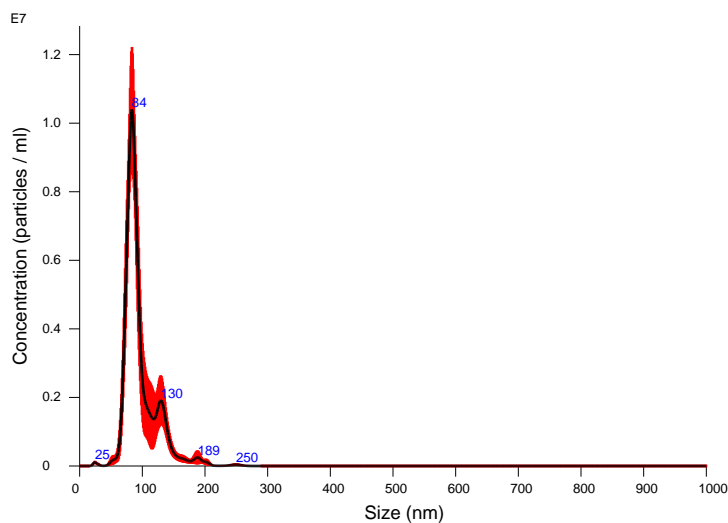

Averaged FTLA Concentration / Size for Experiment:  
STh1\_40x FD0 2023-05-24 17-57-15  
Error bars indicate + / - 1 standard error of the mean

### Included Files

STh1\_40x FD0 2023-05-24 17-57-32  
STh1\_40x FD0 2023-05-24 17-58-14  
STh1\_40x FD0 2023-05-24 17-59-09  
STh1\_40x FD0 2023-05-24 17-59-50  
STh1\_40x FD0 2023-05-24 18-01-02

### Details

NTA Version: NTA 3.4 Build 3.4.4  
Script Used: SOP Standard Measurement 05-57-15PM 24May2023.txt  
Time Captured: 17:57:15 24/05/2023  
Operator: LN  
Pre-treatment:  
Sample Name: STh1\_40x FD0  
Diluent:  
Remarks: Dilution from concentrated NPs+HITC

### Capture Settings

Camera Type: sCMOS  
Laser Type: Green  
Camera Level: 7  
Slider Shutter: 121  
Slider Gain: 24  
FPS: 25.0  
Number of Frames: 749  
Temperature: 24.7 °C  
Viscosity: (Water) 0.9 cP  
Dilution factor: Dilution not recorded

### Analysis Settings

Detect Threshold: 5  
Blur Size: Auto  
Max Jump Distance: Auto: 18.4 - 19.9 pix

### Results

#### Stats: Merged Data

Mean: 95.8 nm  
Mode: 83.3 nm  
SD: 26.5 nm  
D10: 73.5 nm  
D50: 87.5 nm  
D90: 132.0 nm

#### Stats: Mean +/- Standard Error

Mean: 95.9 +/- 1.7 nm  
Mode: 84.7 +/- 2.5 nm  
SD: 26.3 +/- 1.1 nm  
D10: 73.9 +/- 1.2 nm  
D50: 87.8 +/- 0.6 nm  
D90: 128.9 +/- 6.2 nm  
Concentration (Upgrade): 3.06e+08 +/- 1.47e+07 particles/ml  
49.0 +/- 2.1 particles/frame  
107.3 +/- 8.2 centres/frame

Concentration measurements may be unreliable  
See summary file for more info

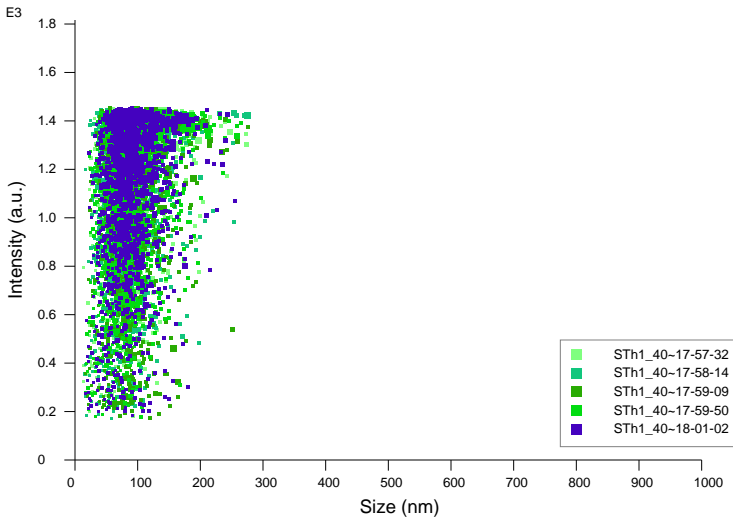

Intensity / Size graph for Experiment:  
STh1\_40x FD0 2023-05-24 17-57-15
