# Supplementary material for: Lyophilizing SERS biosensors to enable translation into an easy-to-use assay
Source: Royal Society of Chemistry journal article supplement (doi:10.1039/d4ay01667j), 2024-01-01
Supplement: d4ay01667j1.zip [file d4ay01667j1.zip]

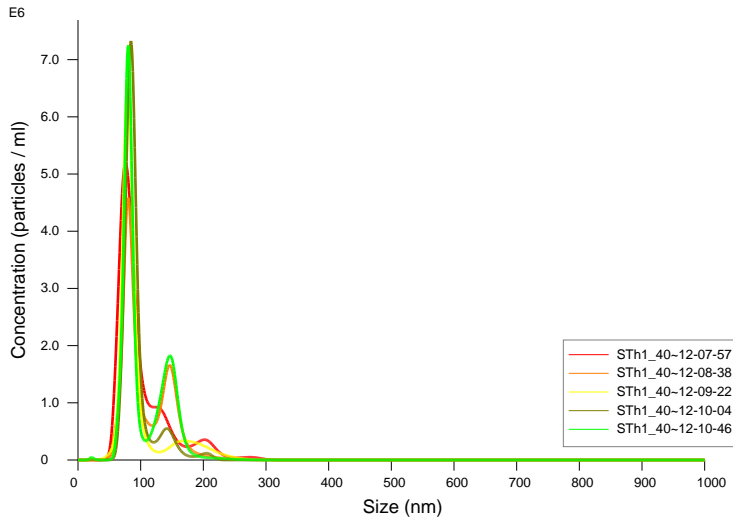

FTLA Concentration / Size graph for Experiment:  
STh1\_40x FD14 2023-06-07 12-07-43

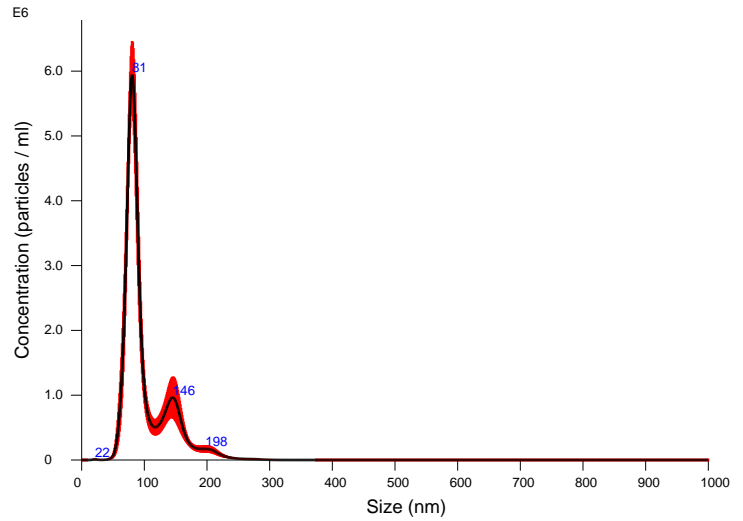

Averaged FTLA Concentration / Size for Experiment:  
STh1\_40x FD14 2023-06-07 12-07-43  
Error bars indicate + / - 1 standard error of the mean

### Included Files

STh1\_40x FD14 2023-06-07 12-07-57  
STh1\_40x FD14 2023-06-07 12-08-38  
STh1\_40x FD14 2023-06-07 12-09-22  
STh1\_40x FD14 2023-06-07 12-10-04  
STh1\_40x FD14 2023-06-07 12-10-46

### Details

NTA Version: NTA 3.4 Build 3.4.4  
Script Used: SOP Standard Measurement 12-07-43PM 07Jun2023.txt  
Time Captured: 12:07:43 07/06/2023  
Operator: LN  
Pre-treatment:  
Sample Name: STh1\_40x FD14  
Diluent:  
Remarks:

### Capture Settings

Camera Type: sCMOS  
Laser Type: Green  
Camera Level: 7  
Slider Shutter: 121  
Slider Gain: 24  
FPS: 25.0  
Number of Frames: 749  
Temperature: 25.4 - 25.5 °C  
Viscosity: (Water) 0.878 - 0.880 cP  
Dilution factor: Dilution not recorded

### Analysis Settings

Detect Threshold: 5  
Blur Size: Auto  
Max Jump Distance: Auto: 18.7 - 19.5 pix

### Results

#### Stats: Merged Data

Mean: 99.9 nm  
Mode: 80.6 nm  
SD: 36.3 nm  
D10: 70.1 nm  
D50: 85.6 nm  
D90: 153.0 nm

#### Stats: Mean +/- Standard Error

Mean: 99.9 +/- 2.4 nm  
Mode: 79.9 +/- 1.4 nm  
SD: 35.4 +/- 2.8 nm  
D10: 70.6 +/- 1.4 nm  
D50: 86.0 +/- 1.3 nm  
D90: 152.8 +/- 5.8 nm  
Concentration (Upgrade): 1.94e+08 +/- 9.29e+06 particles/ml  
31.0 +/- 1.3 particles/frame  
52.7 +/- 4.3 centres/frame

Concentration measurements may be unreliable  
See summary file for more info

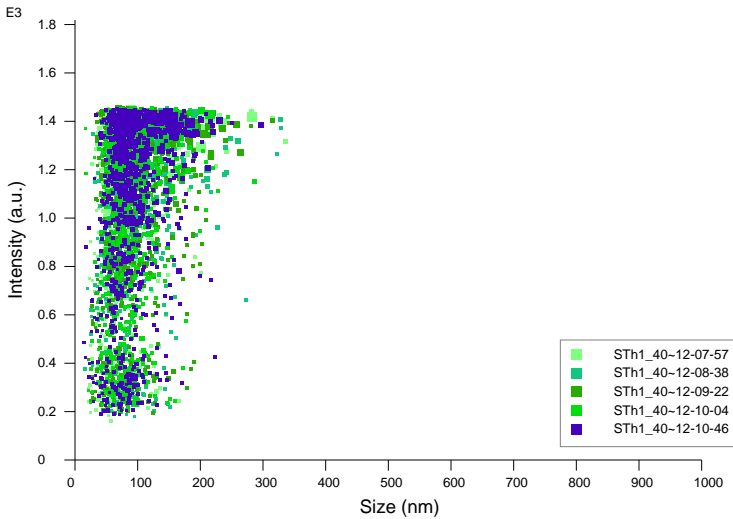

Intensity / Size graph for Experiment:  
STh1\_40x FD14 2023-06-07 12-07-43
