# Supplementary material for: Lyophilizing SERS biosensors to enable translation into an easy-to-use assay
Source: Royal Society of Chemistry journal article supplement (doi:10.1039/d4ay01667j), 2024-01-01
Supplement: d4ay01667j1.zip [file d4ay01667j1.zip]

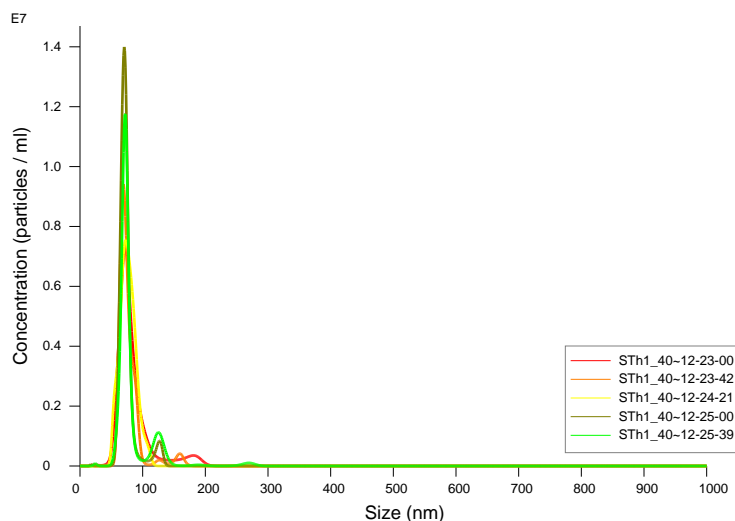

FTLA Concentration / Size graph for Experiment:  
STh1\_40x RT20\_2 2023-06-07 12-22-40

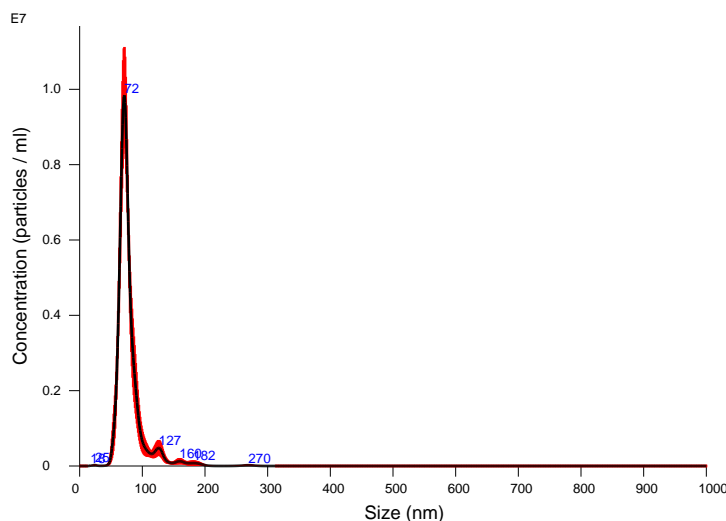

Averaged FTLA Concentration / Size for Experiment:  
STh1\_40x RT20\_2 2023-06-07 12-22-40  
Error bars indicate + / - 1 standard error of the mean

### Included Files

STh1\_40x RT20\_2 2023-06-07 12-23-00  
STh1\_40x RT20\_2 2023-06-07 12-23-42  
STh1\_40x RT20\_2 2023-06-07 12-24-21  
STh1\_40x RT20\_2 2023-06-07 12-25-00  
STh1\_40x RT20\_2 2023-06-07 12-25-39

### Details

NTA Version: NTA 3.4 Build 3.4.4  
Script Used: SOP Standard Measurement 12-22-40PM 07Jun2023.txt  
Time Captured: 12:22:40 07/06/2023  
Operator: LN  
Pre-treatment:  
Sample Name: STh1\_40x Rt20\_2  
Diluent:  
Remarks:

### Capture Settings

Camera Type: sCMOS  
Laser Type: Green  
Camera Level: 6  
Slider Shutter: 64  
Slider Gain: 5  
FPS: 25.0  
Number of Frames: 749  
Temperature: 25.7 - 25.7 °C  
Viscosity: (Water) 0.874 - 0.875 cP  
Dilution factor: Dilution not recorded

### Analysis Settings

Detect Threshold: 5  
Blur Size: Auto  
Max Jump Distance: Auto: 20.8 - 21.8 pix

### Results

#### Stats: Merged Data

Mean: 78.8 nm  
Mode: 71.2 nm  
SD: 22.3 nm  
D10: 62.4 nm  
D50: 73.4 nm  
D90: 98.0 nm

#### Stats: Mean +/- Standard Error

Mean: 78.9 +/- 1.8 nm  
Mode: 71.4 +/- 0.7 nm  
SD: 21.0 +/- 3.5 nm  
D10: 62.3 +/- 0.9 nm  
D50: 73.8 +/- 0.9 nm  
D90: 100.6 +/- 7.1 nm  
Concentration (Upgrade): 2.21e+08 +/- 7.87e+06 particles/ml  
36.0 +/- 1.2 particles/frame  
82.4 +/- 5.8 centres/frame

Concentration measurements may be unreliable  
See summary file for more info

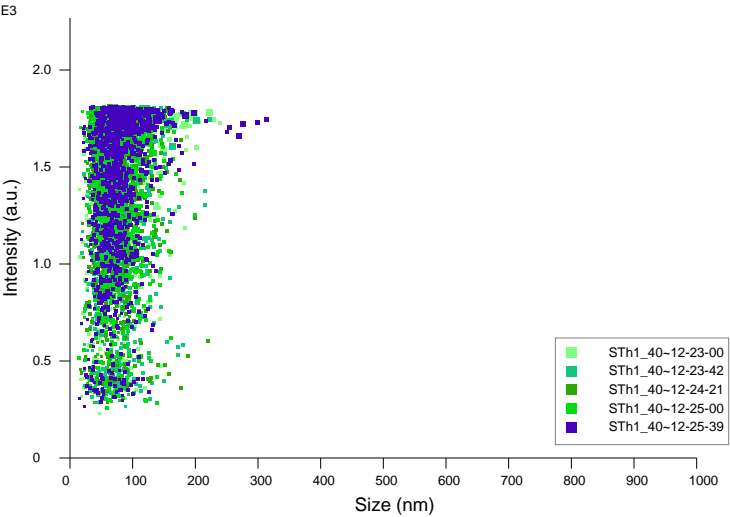

Intensity / Size graph for Experiment:  
STh1\_40x RT20\_2 2023-06-07 12-22-40
