# Supplementary material for: Lyophilizing SERS biosensors to enable translation into an easy-to-use assay
Source: Royal Society of Chemistry journal article supplement (doi:10.1039/d4ay01667j), 2024-01-01
Supplement: d4ay01667j1.zip [file d4ay01667j1.zip]

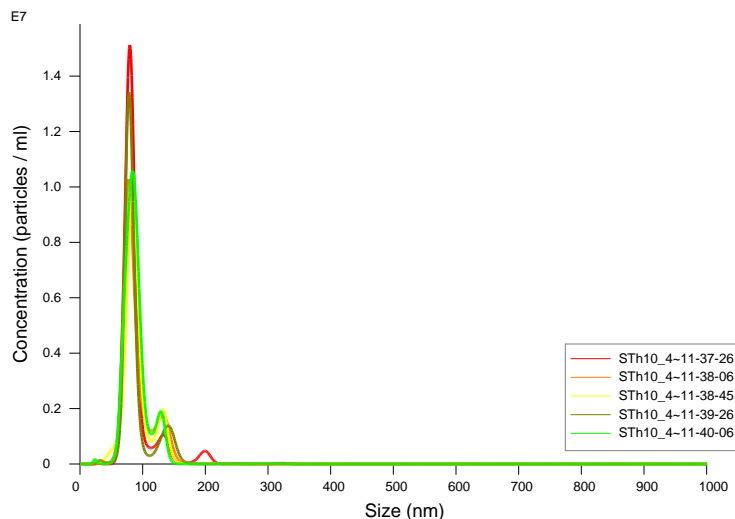

FTLA Concentration / Size graph for Experiment:  
STh10\_40x RT20 2023-06-07 11-37-09

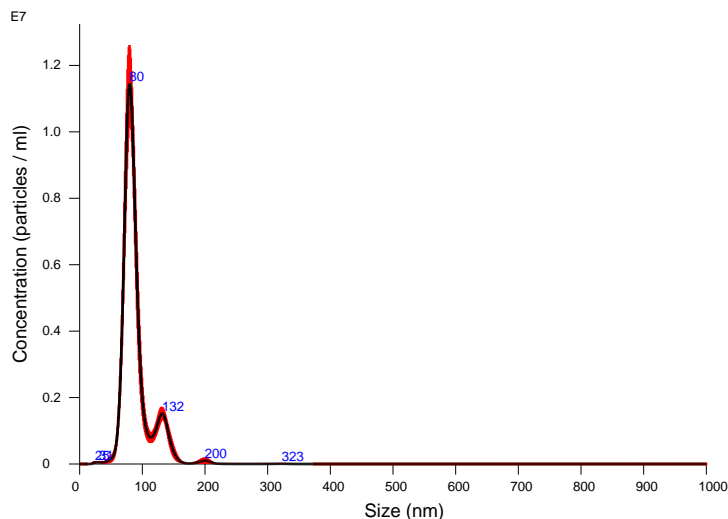

Averaged FTLA Concentration / Size for Experiment:  
STh10\_40x RT20 2023-06-07 11-37-09  
Error bars indicate + / - 1 standard error of the mean

### Included Files

STh10\_40x RT20 2023-06-07 11-37-26  
STh10\_40x RT20 2023-06-07 11-38-06  
STh10\_40x RT20 2023-06-07 11-38-45  
STh10\_40x RT20 2023-06-07 11-39-26  
STh10\_40x RT20 2023-06-07 11-40-06

### Details

NTA Version: NTA 3.4 Build 3.4.4  
Script Used: SOP Standard Measurement 11-37-09AM 07Jun2023.txt  
Time Captured: 11:37:09 07/06/2023  
Operator: LN  
Pre-treatment:  
Sample Name: STh10\_40x RT20  
Diluent:  
Remarks:

### Capture Settings

Camera Type: sCMOS  
Laser Type: Green  
Camera Level: 7  
Slider Shutter: 121  
Slider Gain: 24  
FPS: 25.0  
Number of Frames: 749  
Temperature: 24.9 - 25.0 °C  
Viscosity: (Water) 0.890 - 0.891 cP  
Dilution factor: Dilution not recorded

### Analysis Settings

Detect Threshold: 5  
Blur Size: Auto  
Max Jump Distance: Auto: 19.1 - 20.4 pix

### Results

Stats: Merged Data

Mean: 89.2 nm  
Mode: 79.8 nm  
SD: 23.7 nm  
D10: 69.6 nm  
D50: 82.9 nm  
D90: 125.9 nm

Stats: Mean +/- Standard Error

Mean: 89.2 +/- 0.4 nm  
Mode: 80.5 +/- 1.4 nm  
SD: 23.5 +/- 1.2 nm  
D10: 69.7 +/- 0.3 nm  
D50: 83.1 +/- 1.0 nm  
D90: 125.7 +/- 2.8 nm  
Concentration (Upgrade): 3.21e+08 +/- 1.21e+07 particles/ml  
50.5 +/- 1.7 particles/frame  
110.9 +/- 7.0 centres/frame

Concentration measurements may be unreliable  
See summary file for more info

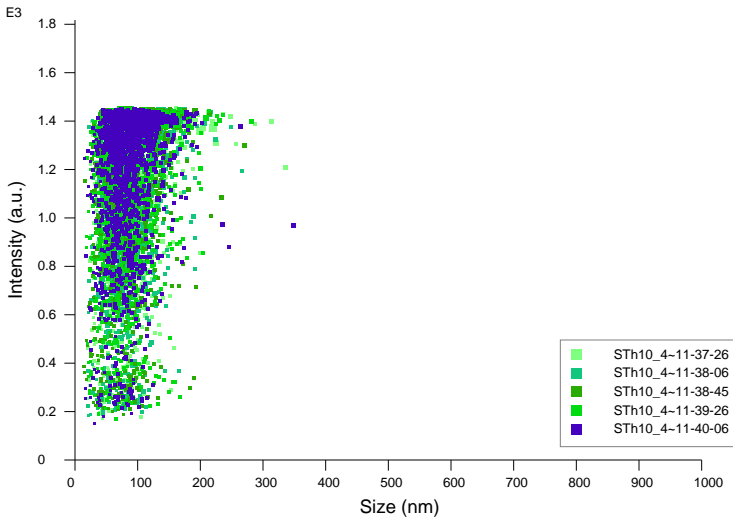

Intensity / Size graph for Experiment:  
STh10\_40x RT20 2023-06-07 11-37-09
