# Supplementary material for: Lyophilizing SERS biosensors to enable translation into an easy-to-use assay
Source: Royal Society of Chemistry journal article supplement (doi:10.1039/d4ay01667j), 2024-01-01
Supplement: d4ay01667j1.zip [file d4ay01667j1.zip]

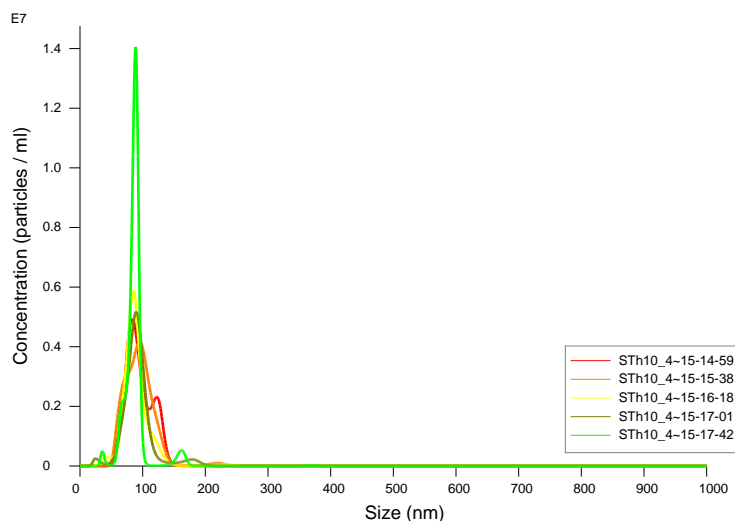

FTLA Concentration / Size graph for Experiment:  
STh10\_40x FD28 2023-06-21 15-14-40

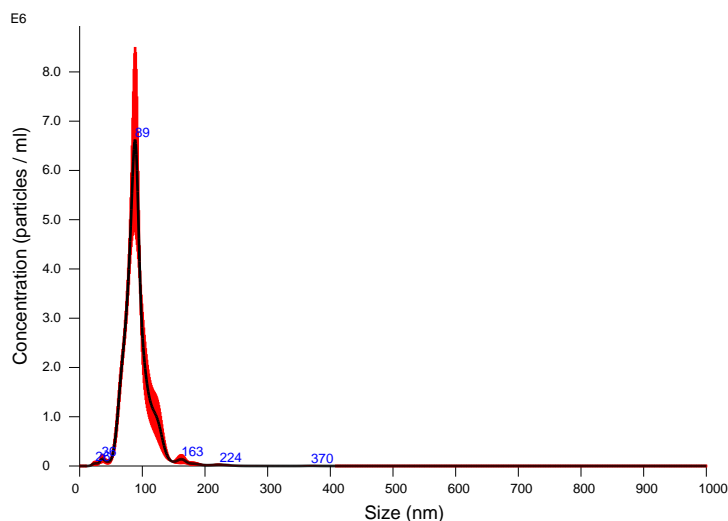

Averaged FTLA Concentration / Size for Experiment:  
STh10\_40x FD28 2023-06-21 15-14-40  
Error bars indicate + / - 1 standard error of the mean

### Included Files

STh10\_40x FD28 2023-06-21 15-14-59  
STh10\_40x FD28 2023-06-21 15-15-38  
STh10\_40x FD28 2023-06-21 15-16-18  
STh10\_40x FD28 2023-06-21 15-17-01  
STh10\_40x FD28 2023-06-21 15-17-42

### Details

NTA Version: NTA 3.4 Build 3.4.4  
Script Used: SOP Standard Measurement 03-14-40PM 21Jun2023.txt  
Time Captured: 15:14:40 21/06/2023  
Operator: LN  
Pre-treatment:  
Sample Name: STh10\_40x FD28  
Diluent:  
Remarks:

### Capture Settings

Camera Type: sCMOS  
Laser Type: Green  
Camera Level: 6  
Slider Shutter: 64  
Slider Gain: 5  
FPS: 25.0  
Number of Frames: 749  
Temperature: 25.2 °C  
Viscosity: (Water) 0.883 - 0.884 cP  
Dilution factor: Dilution not recorded

### Analysis Settings

Detect Threshold: 5  
Blur Size: Auto  
Max Jump Distance: Auto: 20.2 - 23.2 pix

### Results

#### Stats: Merged Data

Mean: 91.5 nm  
Mode: 88.4 nm  
SD: 23.3 nm  
D10: 68.7 nm  
D50: 88.5 nm  
D90: 118.1 nm

#### Stats: Mean +/- Standard Error

Mean: 91.6 +/- 1.5 nm  
Mode: 88.5 +/- 2.1 nm  
SD: 23.1 +/- 0.8 nm  
D10: 68.7 +/- 0.8 nm  
D50: 89.3 +/- 1.2 nm  
D90: 113.6 +/- 5.2 nm  
Concentration (Upgrade): 2.11e+08 +/- 9.33e+06 particles/ml  
34.6 +/- 1.6 particles/frame  
100.3 +/- 9.6 centres/frame

Concentration measurements may be unreliable  
See summary file for more info

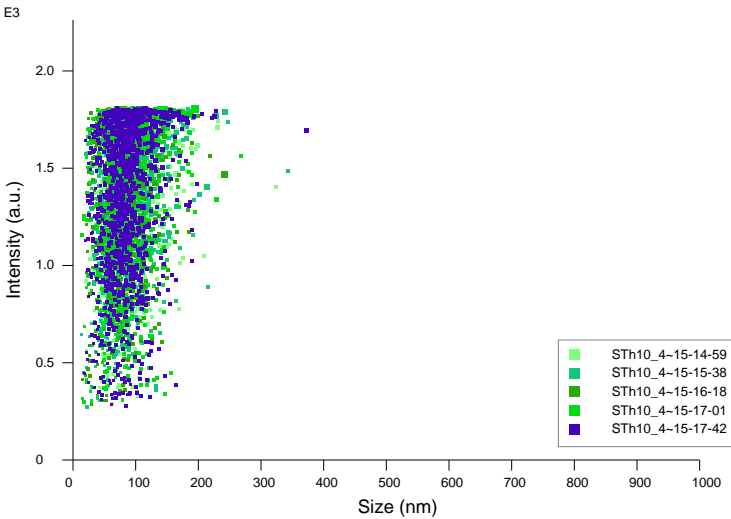

Intensity / Size graph for Experiment:  
STh10\_40x FD28 2023-06-21 15-14-40
