# Supplementary material for: Lyophilizing SERS biosensors to enable translation into an easy-to-use assay
Source: Royal Society of Chemistry journal article supplement (doi:10.1039/d4ay01667j), 2024-01-01
Supplement: d4ay01667j1.zip [file d4ay01667j1.zip]

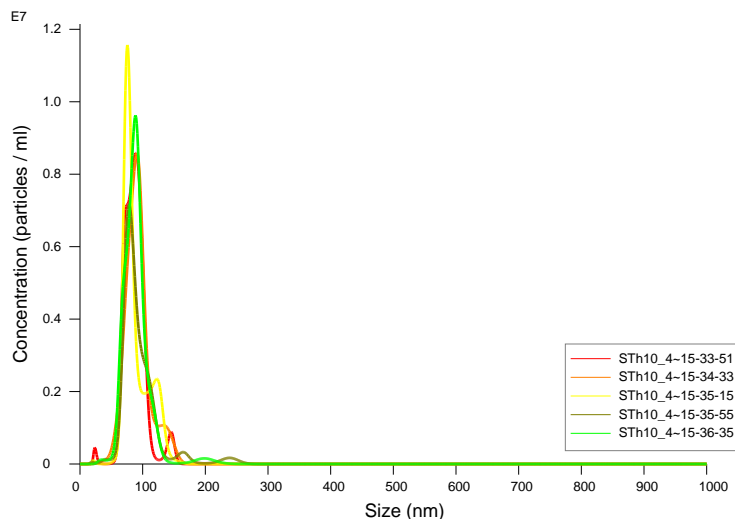

FTLA Concentration / Size graph for Experiment:  
STh10\_40x F 2023-05-24 15-33-36

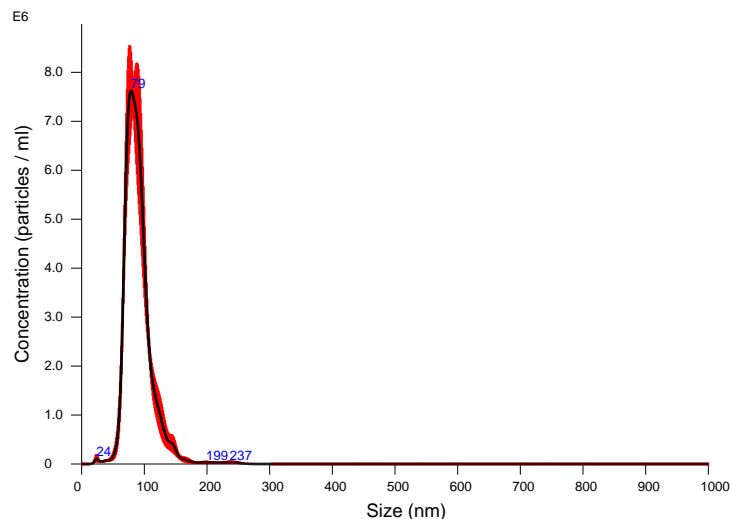

Averaged FTLA Concentration / Size for Experiment:  
STh10\_40x F 2023-05-24 15-33-36  
Error bars indicate + / - 1 standard error of the mean

### Included Files

STh10\_40x F 2023-05-24 15-33-51  
STh10\_40x F 2023-05-24 15-34-33  
STh10\_40x F 2023-05-24 15-35-15  
STh10\_40x F 2023-05-24 15-35-55  
STh10\_40x F 2023-05-24 15-36-35

### Details

NTA Version: NTA 3.4 Build 3.4.4  
Script Used: SOP Standard Measurement 03-33-36PM 24May2023.txt  
Time Captured: 15:33:36 24/05/2023  
Operator: LN  
Pre-treatment:  
Sample Name: STh10\_40x F  
Diluent:  
Remarks: Dilution from concentrated NPs+HITC

### Capture Settings

Camera Type: sCMOS  
Laser Type: Green  
Camera Level: 7  
Slider Shutter: 121  
Slider Gain: 24  
FPS: 25.0  
Number of Frames: 749  
Temperature: 25.9 - 26.0 °C  
Viscosity: (Water) 0.870 - 0.871 cP  
Dilution factor: Dilution not recorded

### Analysis Settings

Detect Threshold: 5  
Blur Size: Auto  
Max Jump Distance: Auto: 19.3 - 20.5 pix

### Results

#### Stats: Merged Data

Mean: 90.1 nm  
Mode: 78.8 nm  
SD: 22.7 nm  
D10: 68.9 nm  
D50: 86.3 nm  
D90: 116.0 nm

#### Stats: Mean +/- Standard Error

Mean: 90.2 +/- 1.1 nm  
Mode: 84.5 +/- 3.1 nm  
SD: 22.5 +/- 2.3 nm  
D10: 68.9 +/- 0.4 nm  
D50: 86.1 +/- 1.4 nm  
D90: 115.6 +/- 3.4 nm  
Concentration (Upgrade): 3.09e+08 +/- 1.39e+07 particles/ml  
47.2 +/- 1.8 particles/frame  
110.7 +/- 7.5 centres/frame

Concentration measurements may be unreliable  
See summary file for more info

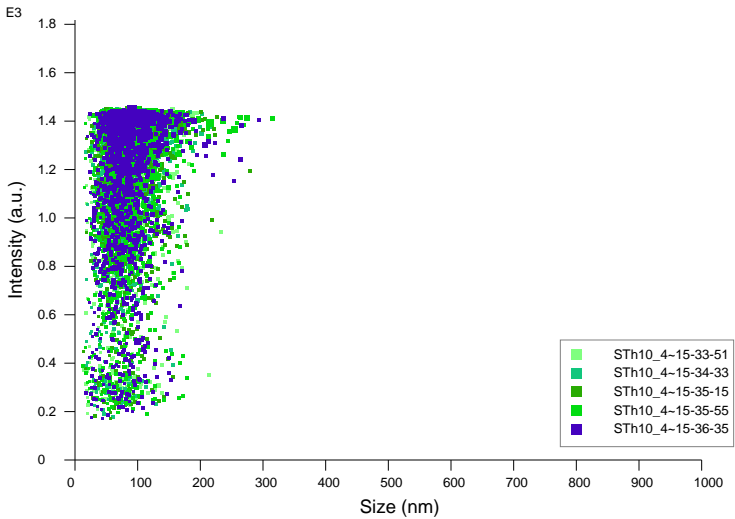

Intensity / Size graph for Experiment:  
STh10\_40x F 2023-05-24 15-33-36
