# Supplementary material for: Lyophilizing SERS biosensors to enable translation into an easy-to-use assay
Source: Royal Society of Chemistry journal article supplement (doi:10.1039/d4ay01667j), 2024-01-01
Supplement: d4ay01667j1.zip [file d4ay01667j1.zip]

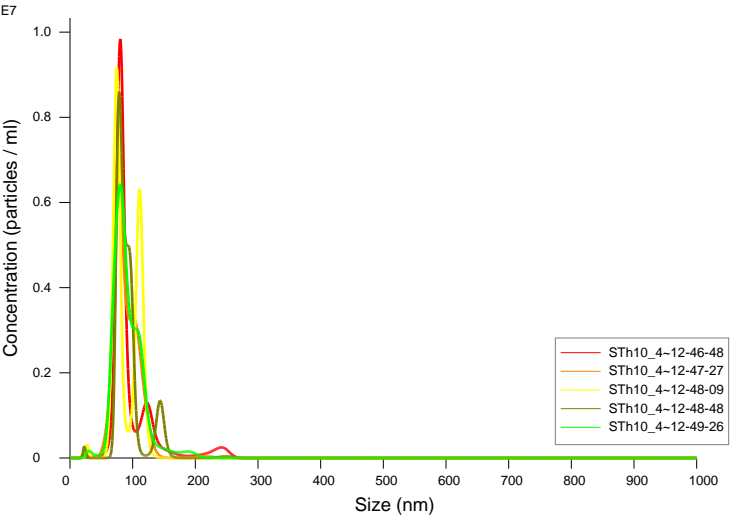

FTLA Concentration / Size graph for Experiment:  
STh10\_40x FD21 2023-06-14 12-46-32

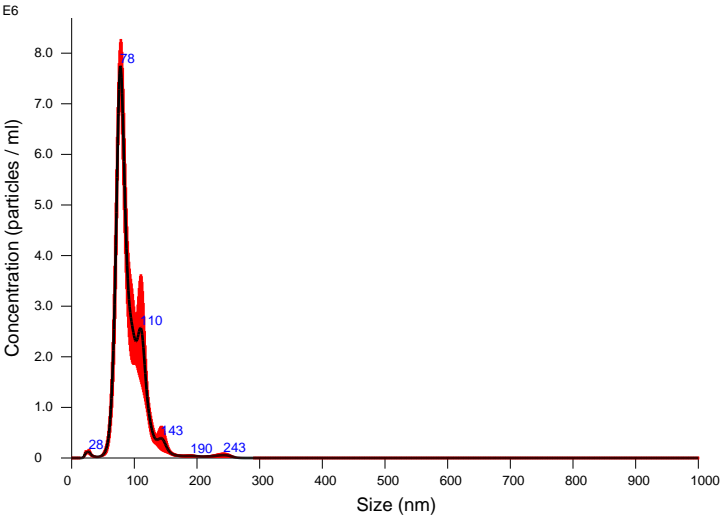

Averaged FTLA Concentration / Size for Experiment:  
STh10\_40x FD21 2023-06-14 12-46-32  
Error bars indicate + / - 1 standard error of the mean

|                                                                                                                                                                                                                                                                                                                                                                                                                                                                                                                                                                                                                                                                                                                                                                                                                                                                                                                                                                                                                                                                                                                 |                                                                                                                                                                                                                                                                                                                                                                                                                                                                                                                                                                                                                                                                                                                                                                |
|-----------------------------------------------------------------------------------------------------------------------------------------------------------------------------------------------------------------------------------------------------------------------------------------------------------------------------------------------------------------------------------------------------------------------------------------------------------------------------------------------------------------------------------------------------------------------------------------------------------------------------------------------------------------------------------------------------------------------------------------------------------------------------------------------------------------------------------------------------------------------------------------------------------------------------------------------------------------------------------------------------------------------------------------------------------------------------------------------------------------|----------------------------------------------------------------------------------------------------------------------------------------------------------------------------------------------------------------------------------------------------------------------------------------------------------------------------------------------------------------------------------------------------------------------------------------------------------------------------------------------------------------------------------------------------------------------------------------------------------------------------------------------------------------------------------------------------------------------------------------------------------------|
| <div><div>Included Files</div><div>STh10_40x FD21 2023-06-14 12-46-48<br/>STh10_40x FD21 2023-06-14 12-47-27<br/>STh10_40x FD21 2023-06-14 12-48-09<br/>STh10_40x FD21 2023-06-14 12-48-48<br/>STh10_40x FD21 2023-06-14 12-49-26</div><div><div>Details</div><div><div>NTA Version:NTA 3.4 Build 3.4.4</div><div>Script Used:SOP Standard Measurement 12-46-32PM 14Jun2023.txt</div><div>Time Captured:12:46:32 14/06/2023</div><div>Operator:LN</div><div>Pre-treatment:</div><div>Sample Name:STh10_40x FD21</div><div>Diluent:</div><div>Remarks:</div></div><div><div>Capture Settings</div><div><div>Camera Type:sCMOS</div><div>Laser Type:Green</div><div>Camera Level:6</div><div>Slider Shutter:64</div><div>Slider Gain:5</div><div>FPS25.0</div><div>Number of Frames:749</div><div>Temperature:25.2 - 25.2 °C</div><div>Viscosity:(Water) 0.884 - 0.885 cP</div><div>Dilution factor:Dilution not recorded</div></div><div><div>Analysis Settings</div><div><div>Detect Threshold:5</div><div>Blur Size:Auto</div><div>Max Jump Distance:Auto: 20.3 - 21.0 pix</div></div></div></div></div></div> | <div><div>Results</div><div><div>Stats: Merged Data</div><div><div>Mean:91.7 nm</div><div>Mode:77.8 nm</div><div>SD:25.5 nm</div><div>D10:70.3 nm</div><div>D50:84.6 nm</div><div>D90:118.4 nm</div></div><div><div>Stats: Mean +/- Standard Error</div><div><div>Mean:91.8 +/- 1.3 nm</div><div>Mode:78.1 +/- 1.0 nm</div><div>SD:24.9 +/- 3.1 nm</div><div>D10:70.6 +/- 1.3 nm</div><div>D50:84.4 +/- 1.0 nm</div><div>D90:123.1 +/- 4.4 nm</div></div><div><div>Concentration (Upgrade):</div><div>2.33e+08 +/- 8.53e+06 particles/ml</div><div>37.5 +/- 1.4 particles/frame</div><div>103.7 +/- 5.0 centres/frame</div></div><div><div>Concentration measurements may be unreliable</div><div>See summary file for more info</div></div></div></div></div> |
|-----------------------------------------------------------------------------------------------------------------------------------------------------------------------------------------------------------------------------------------------------------------------------------------------------------------------------------------------------------------------------------------------------------------------------------------------------------------------------------------------------------------------------------------------------------------------------------------------------------------------------------------------------------------------------------------------------------------------------------------------------------------------------------------------------------------------------------------------------------------------------------------------------------------------------------------------------------------------------------------------------------------------------------------------------------------------------------------------------------------|----------------------------------------------------------------------------------------------------------------------------------------------------------------------------------------------------------------------------------------------------------------------------------------------------------------------------------------------------------------------------------------------------------------------------------------------------------------------------------------------------------------------------------------------------------------------------------------------------------------------------------------------------------------------------------------------------------------------------------------------------------------|

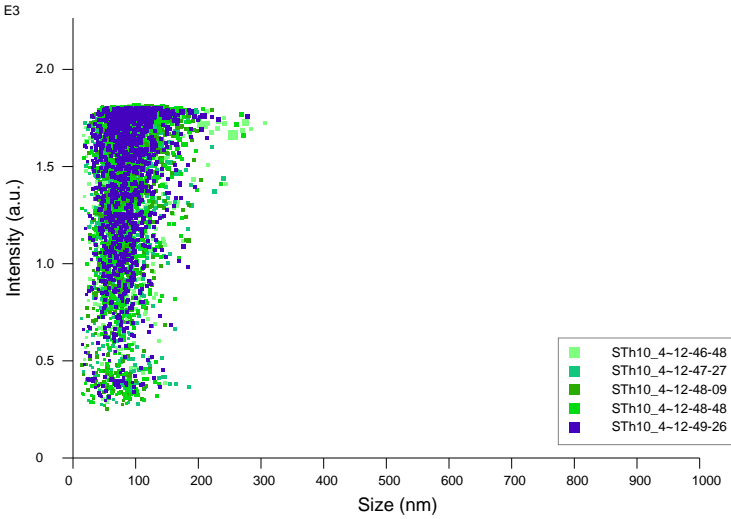

Intensity / Size graph for Experiment:  
STh10\_40x FD21 2023-06-14 12-46-32
