# Supplementary material for: Lyophilizing SERS biosensors to enable translation into an easy-to-use assay
Source: Royal Society of Chemistry journal article supplement (doi:10.1039/d4ay01667j), 2024-01-01
Supplement: d4ay01667j1.zip [file d4ay01667j1.zip]

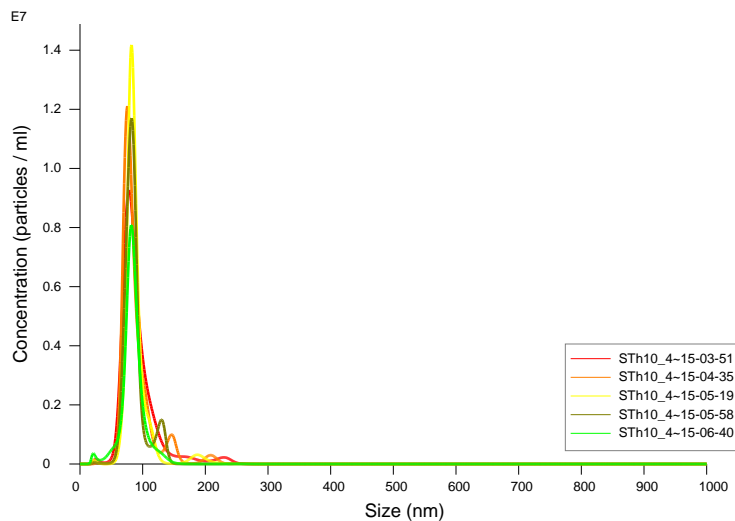

FTLA Concentration / Size graph for Experiment:  
STh10\_40x RT6 2023-05-24 15-03-37

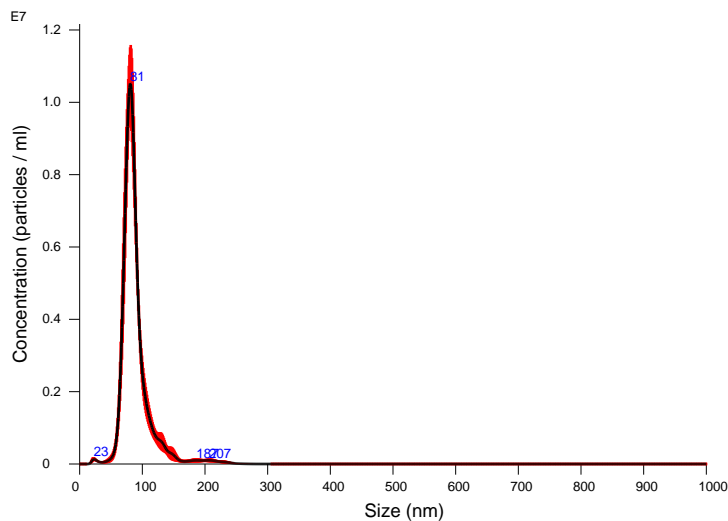

Averaged FTLA Concentration / Size for Experiment:  
STh10\_40x RT6 2023-05-24 15-03-37  
Error bars indicate + / - 1 standard error of the mean

### Included Files

STh10\_40x RT6 2023-05-24 15-03-51  
STh10\_40x RT6 2023-05-24 15-04-35  
STh10\_40x RT6 2023-05-24 15-05-19  
STh10\_40x RT6 2023-05-24 15-05-58  
STh10\_40x RT6 2023-05-24 15-06-40

### Details

NTA Version: NTA 3.4 Build 3.4.4  
Script Used: SOP Standard Measurement 03-03-37PM 24May2023.txt  
Time Captured: 15:03:37 24/05/2023  
Operator: LN  
Pre-treatment:  
Sample Name: STh10\_40x RT6  
Diluent:  
Remarks: Dilution from concentrated NPs+HITC

### Capture Settings

Camera Type: sCMOS  
Laser Type: Green  
Camera Level: 7  
Slider Shutter: 121  
Slider Gain: 24  
FPS: 25.0  
Number of Frames: 749  
Temperature: 25.6 - 25.6 °C  
Viscosity: (Water) 0.9 cP  
Dilution factor: Dilution not recorded

### Analysis Settings

Detect Threshold: 5  
Blur Size: Auto  
Max Jump Distance: Auto: 20.1 - 25.4 pix

### Results

#### Stats: Merged Data

Mean: 88.6 nm  
Mode: 80.9 nm  
SD: 24.7 nm  
D10: 69.3 nm  
D50: 83.3 nm  
D90: 113.2 nm

#### Stats: Mean +/- Standard Error

Mean: 88.2 +/- 1.4 nm  
Mode: 80.1 +/- 1.3 nm  
SD: 23.4 +/- 2.4 nm  
D10: 69.2 +/- 1.3 nm  
D50: 83.2 +/- 0.6 nm  
D90: 112.9 +/- 3.4 nm  
Concentration (Upgrade): 3.02e+08 +/- 2.28e+07 particles/ml  
47.2 +/- 3.5 particles/frame  
116.3 +/- 6.9 centres/frame

Concentration measurements may be unreliable  
See summary file for more info

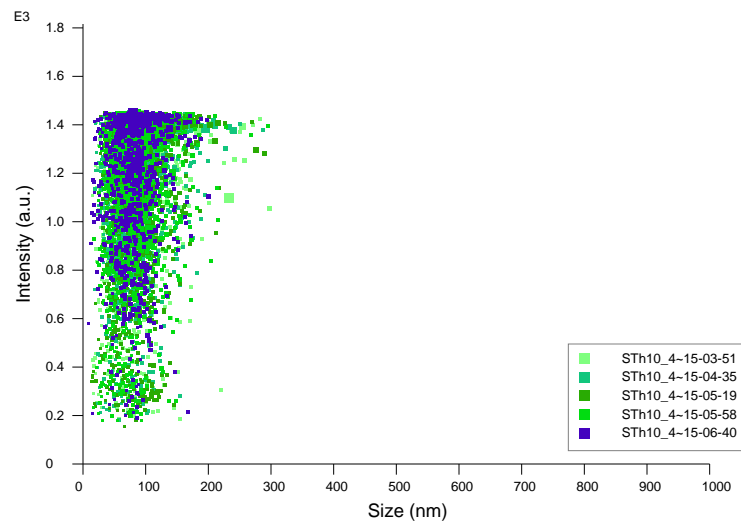

Intensity / Size graph for Experiment:  
STh10\_40x RT6 2023-05-24 15-03-37
