# Supplementary material for: Lyophilizing SERS biosensors to enable translation into an easy-to-use assay
Source: Royal Society of Chemistry journal article supplement (doi:10.1039/d4ay01667j), 2024-01-01
Supplement: d4ay01667j1.zip [file d4ay01667j1.zip]

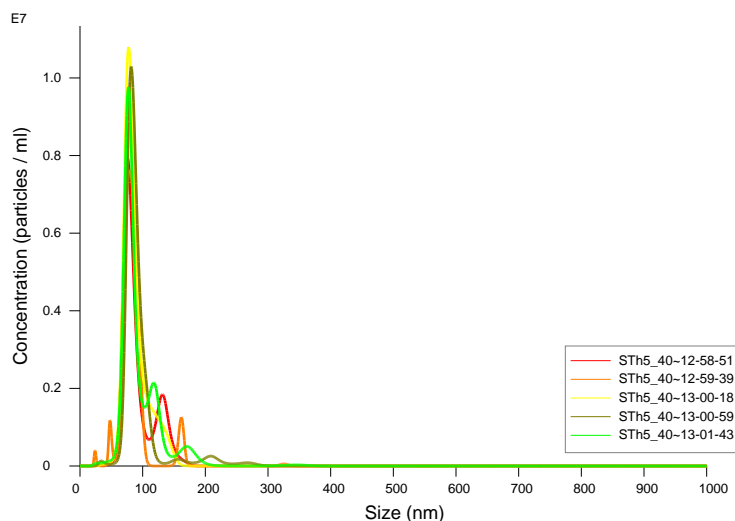

FTLA Concentration / Size graph for Experiment:  
STh5\_40x FD7 2023-05-31 12-58-36

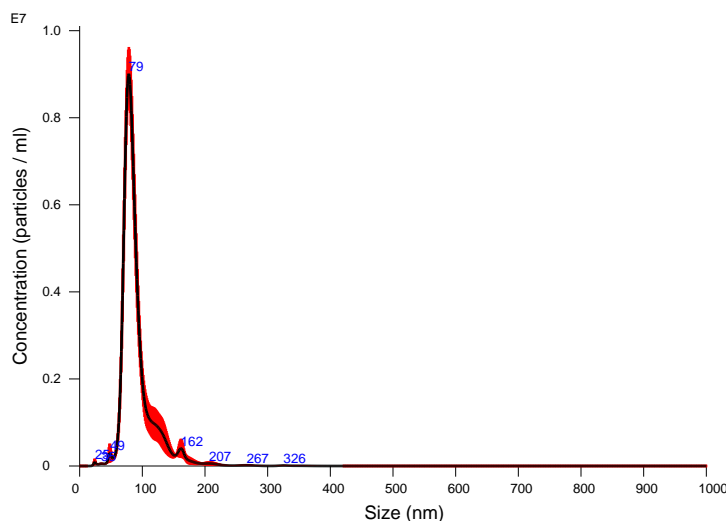

Averaged FTLA Concentration / Size for Experiment:  
STh5\_40x FD7 2023-05-31 12-58-36  
Error bars indicate + / - 1 standard error of the mean

### Included Files

STh5\_40x FD7 2023-05-31 12-58-51  
STh5\_40x FD7 2023-05-31 12-59-39  
STh5\_40x FD7 2023-05-31 13-00-18  
STh5\_40x FD7 2023-05-31 13-00-59  
STh5\_40x FD7 2023-05-31 13-01-43

### Details

NTA Version: NTA 3.4 Build 3.4.4  
Script Used: SOP Standard Measurement 12-58-36PM 31May2023.txt  
Time Captured: 12:58:36 31/05/2023  
Operator: LN  
Pre-treatment:  
Sample Name: STh5\_40x FD7  
Diluent:  
Remarks:

### Capture Settings

Camera Type: sCMOS  
Laser Type: Green  
Camera Level: 7  
Slider Shutter: 121  
Slider Gain: 24  
FPS: 25.0  
Number of Frames: 749  
Temperature: 25.4 - 25.5 °C  
Viscosity: (Water) 0.879 - 0.881 cP  
Dilution factor: Dilution not recorded

### Analysis Settings

Detect Threshold: 5  
Blur Size: Auto  
Max Jump Distance: Auto: 19.3 - 22.8 pix

### Results

#### Stats: Merged Data

Mean: 90.8 nm  
Mode: 78.4 nm  
SD: 28.2 nm  
D10: 69.8 nm  
D50: 83.1 nm  
D90: 124.2 nm

#### Stats: Mean +/- Standard Error

Mean: 90.7 +/- 1.6 nm  
Mode: 78.3 +/- 1.0 nm  
SD: 27.7 +/- 2.6 nm  
D10: 70.0 +/- 1.0 nm  
D50: 82.9 +/- 0.7 nm  
D90: 118.1 +/- 6.3 nm  
Concentration (Upgrade): 2.62e+08 +/- 1.58e+07 particles/ml  
40.9 +/- 2.2 particles/frame  
90.9 +/- 6.1 centres/frame

Concentration measurements may be unreliable  
See summary file for more info

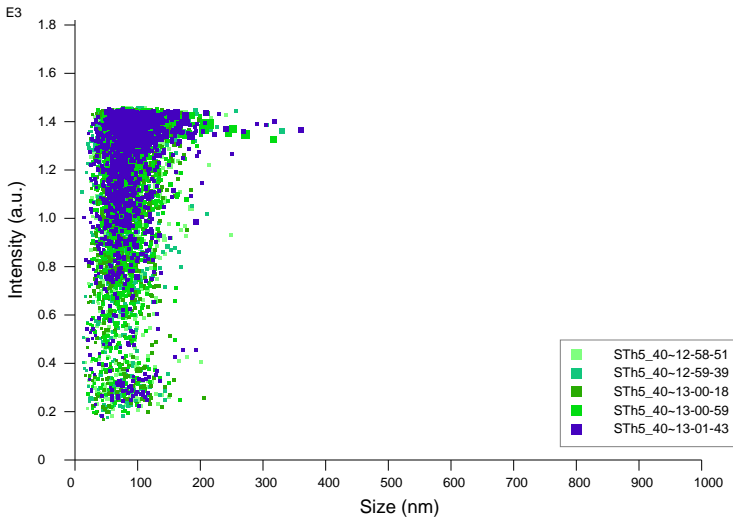

Intensity / Size graph for Experiment:  
STh5\_40x FD7 2023-05-31 12-58-36
