# Supplementary material for: Lyophilizing SERS biosensors to enable translation into an easy-to-use assay
Source: Royal Society of Chemistry journal article supplement (doi:10.1039/d4ay01667j), 2024-01-01
Supplement: d4ay01667j2.pdf [file d4ay01667j2.pdf]

### SUPPLEMENTARY INFORMATION

#### Lyophilizing SERS Biosensors to Enable Translation into Easy-to-Use Assay

Lutfun Naher, Steven Quarin, Der Vang, Pietro Strobbia\*

Department of Chemistry, University of Cincinnati, Cincinnati, OH, USA

\* corresponding author: strobbpo@ucmail.uc.edu

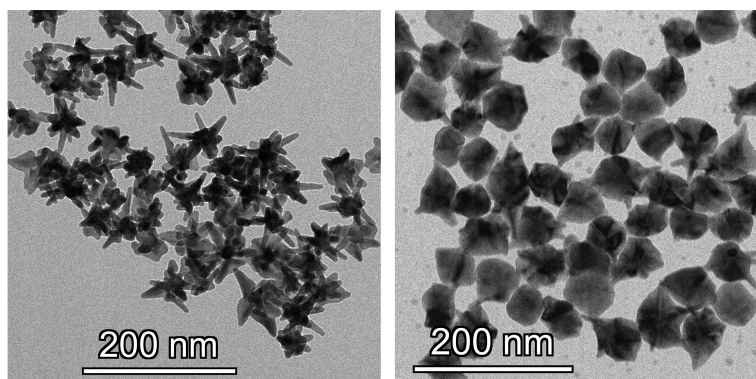

**Figure S1.** TEM images of gold nanostars (a), silver-coated gold nanostars.

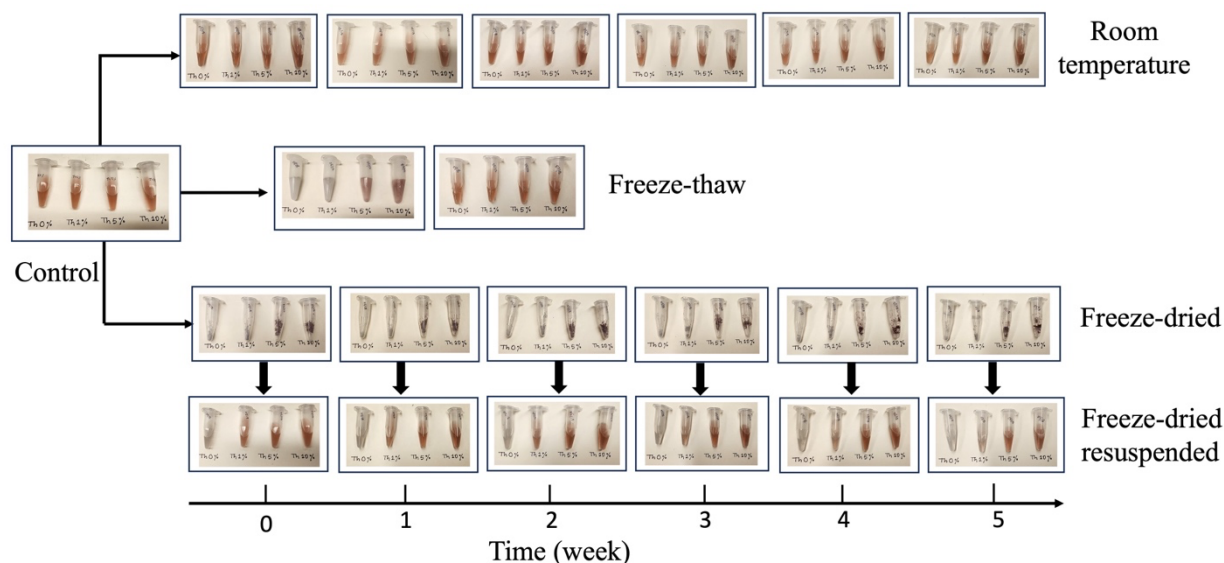

**Figure S2.** Physical appearance of sensors during storage over time in solution (C), freeze-thaw (FT) and freeze-dried (FD). The last one both in dry form and resuspended. All sensors are represented as a function of storage time in weeks. FT sensors were only pictured for one cycle on day 2.

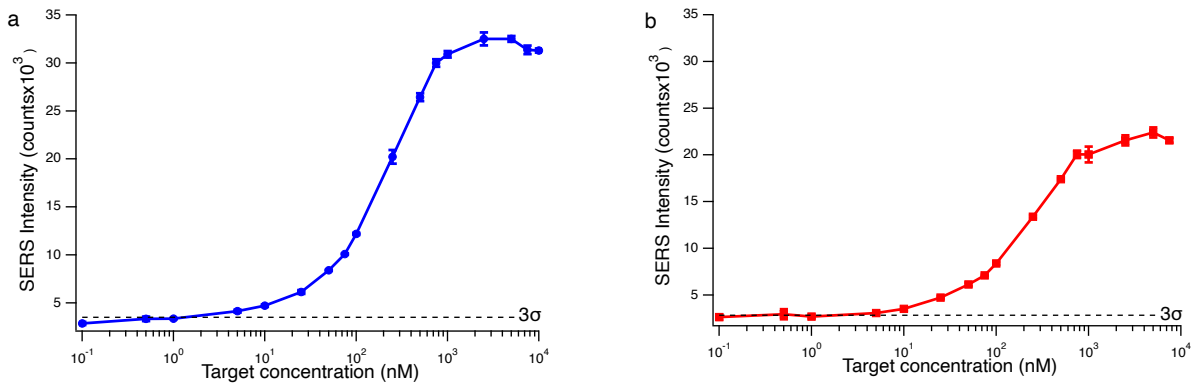

**Figure S3.** Calibration curves of sensors in solution (a) and after the freeze-drying process (b) as a function of increasing concentrations of synthetic target DNA.  $3\sigma$  dashed line represent the LOD level (blank signal +  $3 \times$  standard deviation of the blank). While the signal in the freeze-dried sensors is decreased, the LOD falls for both calibration between 1 and 5 nM.

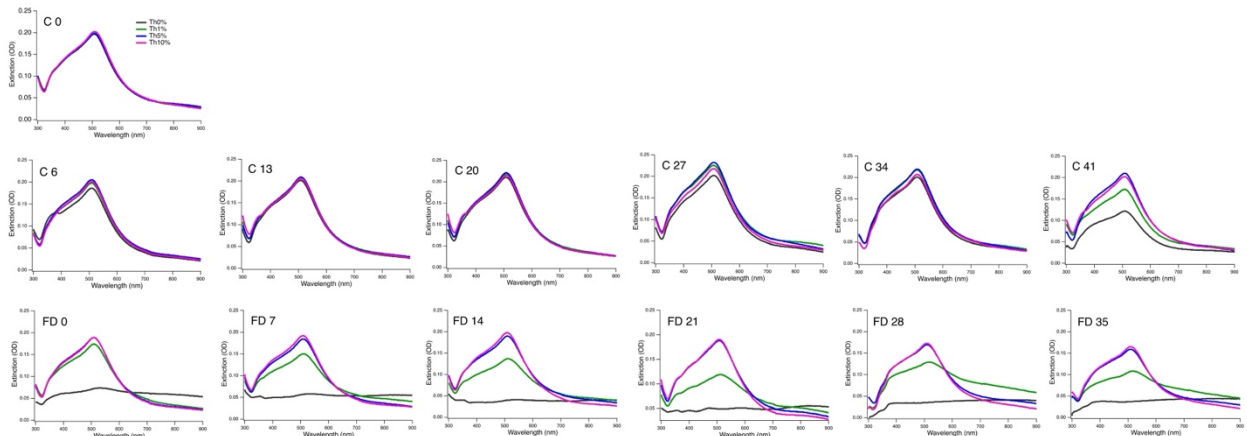

**Figure S4.** The extinction spectra of sensors at different time intervals of storage at room temperature in solution (C) and freeze-dried (FD) after resuspension.

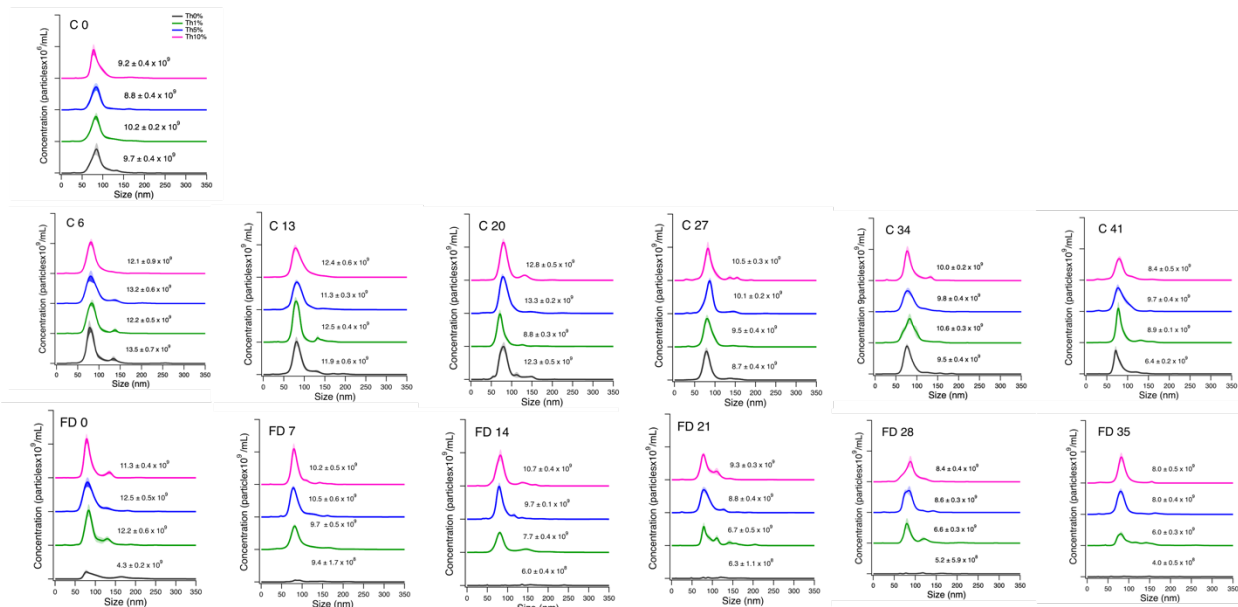

**Figure S5.** NTA shows size and concentration of functionalized sensors at different time intervals of storage at room temperature in solution (C) and freeze-dried (FD) after resuspension (y-offset for clarity). Each figure reports the calculated concentration. All graphs report different concentrations of trehalose as different colors.

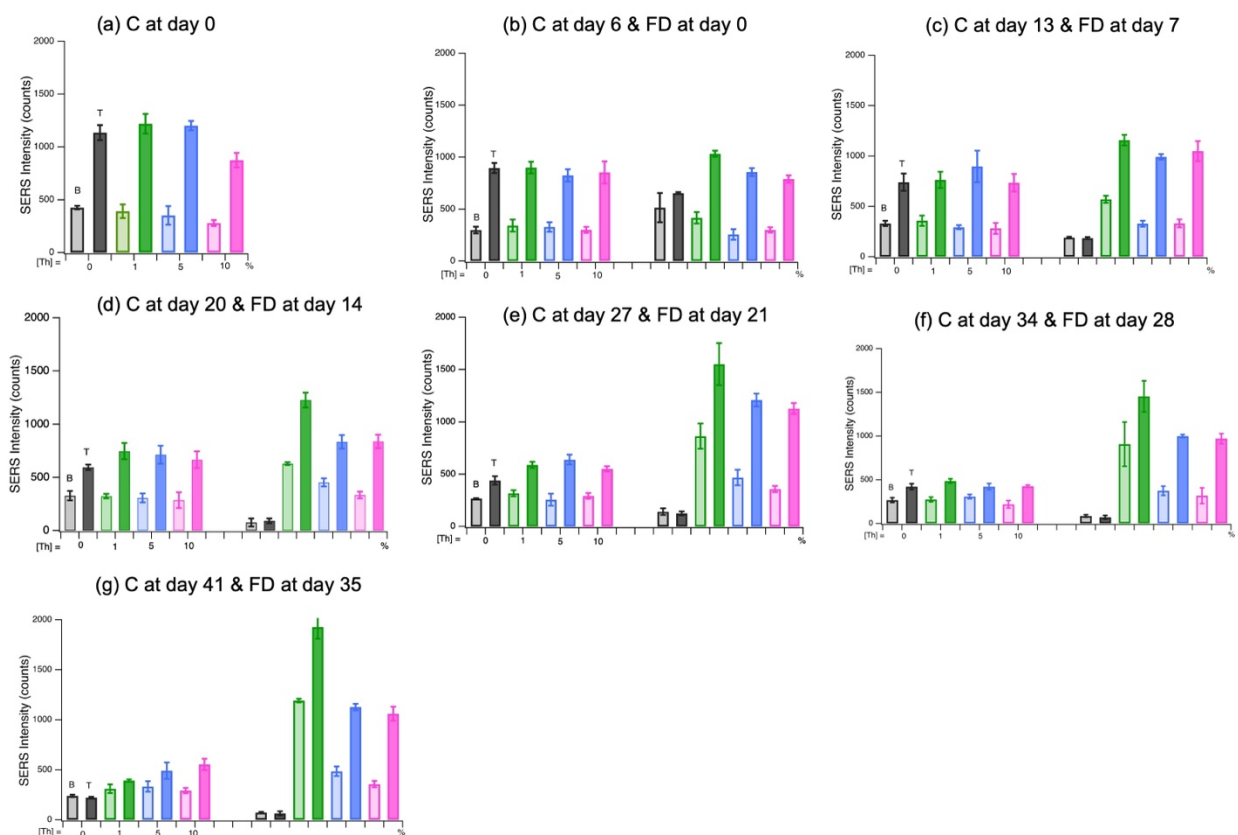

**Figure S6.** SERS sensor intensity for blank and target samples. All graphs show sensors stored in solution (C) and freeze-dried (FD), respectively left and right clusters in each graph. (a) Represent day 0 that is the initial state of the sensors as synthesized and has no freeze-dried correspondence. Different color lines represent concentrations of trehalose as reported in the x-axis ([Th] = % w/w of trehalose).

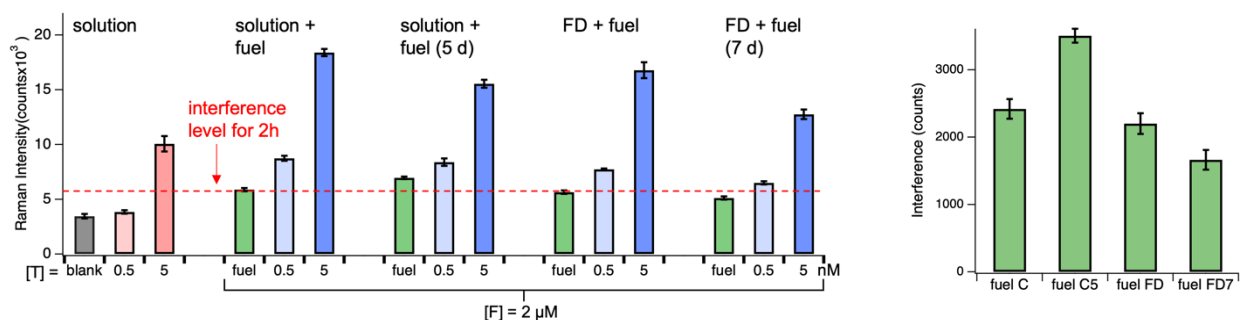

**Figure S7.** Left panel: Sensors response as a function of target concentration ([T]) with and without fuel (+ fuel) for sensors stored in different conditions (solution or lyophilized (FD)) and for different time (0 and 5 or 7 days for solution and FD, respectively). Right panel: Interference for the different storing condition and time calculated as fuel - blank. Fuel concentration ([F]) used is  $2 \mu\text{M}$ . Red dashed line reports the benchmark interference for catalytic sensing.

**Table S1.** DNA sequences used in the experiments.

|                         |                                                    |
|-------------------------|----------------------------------------------------|
| Probe                   | HS-TTTTTTATAGCATTTAGAAAATGTTACTTGGTTCCATGCTATA-Cy5 |
| PH                      | GACATATATAGCATGGAACCAAGTAACATTTTCTAAA              |
| Fuel                    | TTTAGAAAATGTTACTTGGTTCCATGCTATATTTTTTAT            |
| COVID Target (Omicron): | AATGTTACTTGGTTCCATGCTATATATGTC                     |
| COVID Target (Delta):   | AATGTTACTTGGTTCCATGCTATACATGTC                     |
|                         |                                                    |
| Probe                   | HS- AAAA ACTCTATAACTTGATGGTGGTGTAGGGATTATAGAG-Cy5  |
| PH                      | GAAAGCGACTCTATAATCCCTACACCACCATCAAGTTAT            |
| Fuel                    | AAAGCTGAGGAGGTGGTGTAGGGATTATAGAGTCGCTTTCAAGATAAATT |
| RSAD2 Target            | ATAACTTGATGGTGGTGTAGGGATTATAGAGTTTTTCTCTAT         |

**Table S2.** Nanoparticle average sizes during the lyophilization process.

| Sensors | Particle size (nm) |     |     |     |
|---------|--------------------|-----|-----|-----|
|         | Peak               | C   | FT  | FD  |
| Th0%    | Major              | 85  | 81  | 78  |
|         | Minor              | 191 | 193 | 165 |
| Th1%    | Major              | 84  | 83  | 84  |
|         | Minor              | 222 | 133 | 189 |
| Th5%    | Major              | 79  | 82  | 81  |
|         | Minor              | 187 | 180 | 181 |
| Th10%   | Major              | 81  | 79  | 79  |
|         | Minor              | 161 | 199 | 135 |
